# Supplementary material for: A flexible kinetic assay efficiently sorts prospective biocatalysts for PET plastic subunit hydrolysis
Source: Royal Society of Chemistry journal article supplement (doi:10.1039/d2ra00612j), 2022-01-01
Supplement: d2ra00612j1.zip [file 0 hr Control 50C pH8.pdf › 2021 Beech BHET SI/HPLC PDF Reports/50C pH8/0 hr Control 50C pH8.pdf]

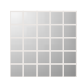SHIMADZU  
LabSolutions

## Analysis Report

## &lt;Sample Information&gt;

|                  |                                        |              |                        |
|------------------|----------------------------------------|--------------|------------------------|
| Sample Name      | : 0 hr Control ER1 50C                 |              |                        |
| Sample ID        | :                                      |              |                        |
| Data Filename    | : 0 hr Control ER1 50C_032.lcd         |              |                        |
| Method Filename  | : MHET_BHET_rpamide_060721.lcm         |              |                        |
| Batch Filename   | : BHET_Colorimetric_50C_pH8_plate1.lcb |              |                        |
| Vial #           | : 4-22                                 | Sample Type  | : Unknown              |
| Injection Volume | : 10 uL                                |              |                        |
| Date Acquired    | : 8/30/2021 10:34:57 PM                | Acquired by  | : System Administrator |
| Date Processed   | : 9/3/2021 8:52:23 AM                  | Processed by | : System Administrator |

## &lt;Chromatogram&gt;

mAU

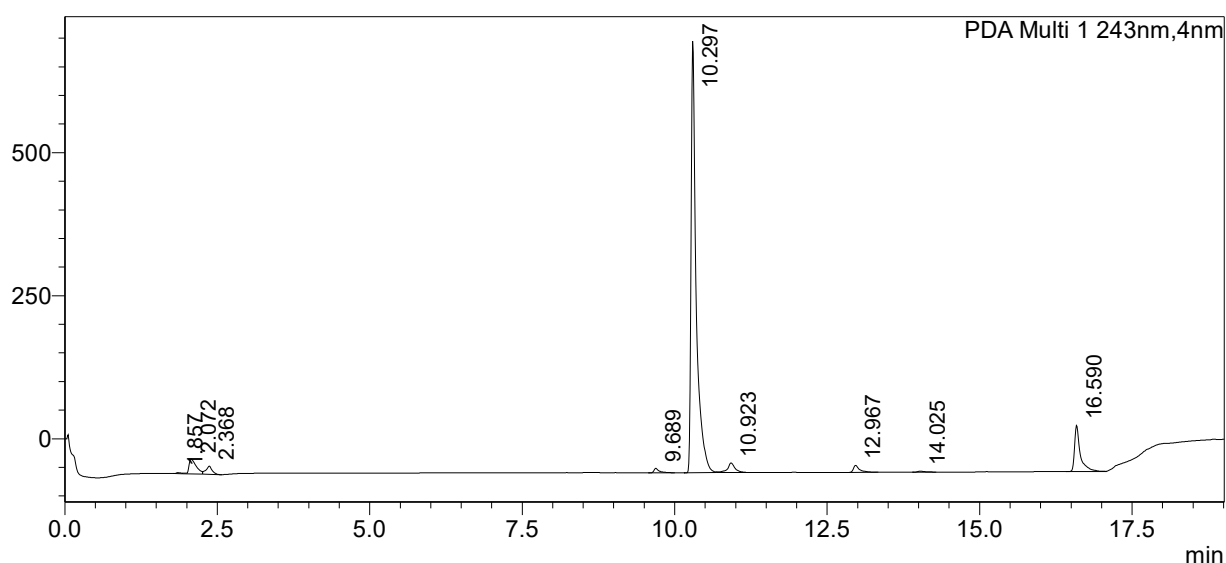

mAU

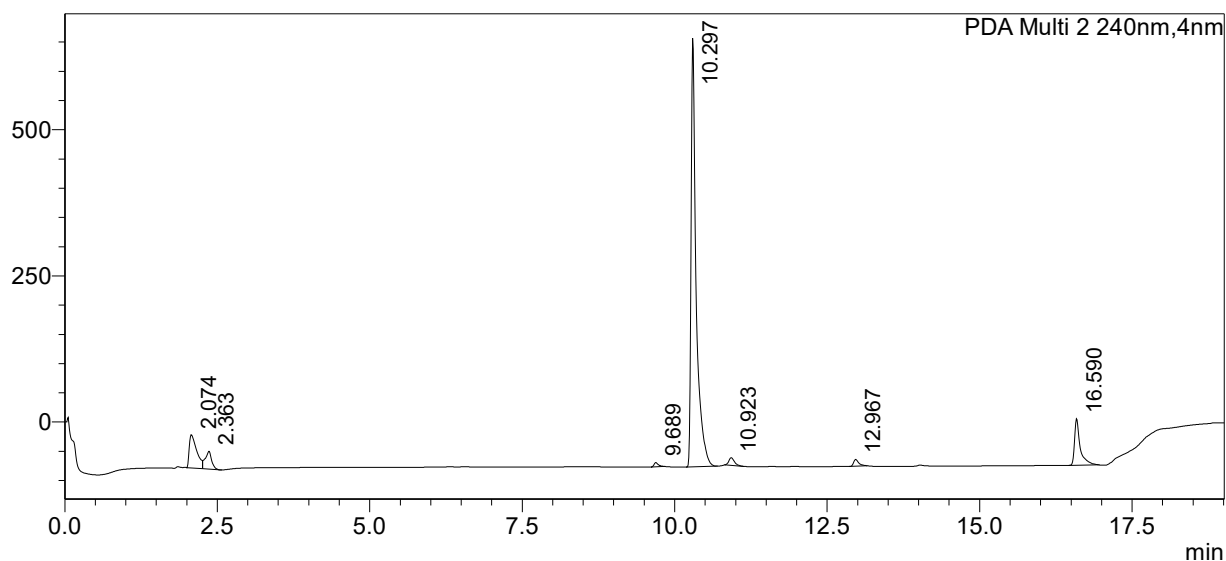

## &lt;Peak Table&gt;

PDA Ch1 243nm

| Peak# | Ret. Time | Area    | Height | Conc.   | Unit | Mark | Name |
|-------|-----------|---------|--------|---------|------|------|------|
| 1     | 1.857     | 10188   | 1813   | 0.000   |      |      |      |
| 2     | 2.072     | 223289  | 26295  | 0.000   |      | V    |      |
| 3     | 2.368     | 101759  | 14743  | 0.000   |      | V    |      |
| 4     | 9.689     | 45593   | 7699   | 1.113   | uM   |      | MHET |
| 5     | 10.297    | 4446971 | 754231 | 435.193 | uM   |      | BHET |
| 6     | 10.923    | 149715  | 16955  | 0.000   |      | V    |      |
| 7     | 12.967    | 85706   | 12261  | 0.000   |      |      |      |
| 8     | 14.025    | 14394   | 1899   | 0.000   |      |      |      |
| 9     | 16.590    | 529497  | 80360  | 0.000   |      |      |      |
| Total |           | 5607112 | 916256 |         |      |      |      |

## PDA Ch2 240nm

| Peak# | Ret. Time | Area    | Height | Conc. | Unit | Mark | Name |
|-------|-----------|---------|--------|-------|------|------|------|
| 1     | 2.074     | 492842  | 56665  | 0.000 |      |      |      |
| 2     | 2.363     | 218944  | 30593  | 0.000 |      | V    |      |
| 3     | 9.689     | 35495   | 7219   | 0.000 |      |      |      |
| 4     | 10.297    | 4303365 | 733176 | 0.000 |      |      |      |
| 5     | 10.923    | 86313   | 13274  | 0.000 |      |      |      |
| 6     | 12.967    | 68904   | 11561  | 0.000 |      |      |      |
| 7     | 16.590    | 512411  | 79524  | 0.000 |      |      |      |
| Total |           | 5718275 | 932013 |       |      |      |      |
