# Supplementary material for: A flexible kinetic assay efficiently sorts prospective biocatalysts for PET plastic subunit hydrolysis
Source: Royal Society of Chemistry journal article supplement (doi:10.1039/d2ra00612j), 2022-01-01
Supplement: d2ra00612j1.zip [file 0 hr Control pH7 37C.pdf › 2021 Beech BHET SI/HPLC PDF Reports/37C pH7/0 hr Control pH7 37C.pdf]

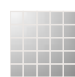SHIMADZU  
LabSolutions

# Analysis Report

## <Sample Information>

|                  |                                          |              |                        |
|------------------|------------------------------------------|--------------|------------------------|
| Sample Name      | : 0 hr Control ER2 pH7                   |              |                        |
| Sample ID        | :                                        |              |                        |
| Data Filename    | : 0 hr Control ER2 pH7_049.lcd           |              |                        |
| Method Filename  | : MHET_BHET_rpamide_060721.lcm           |              |                        |
| Batch Filename   | : BHET_Colorimetric_37C_pH7_09072021.lcb |              |                        |
| Vial #           | : 3-33                                   | Sample Type  | : Unknown              |
| Injection Volume | : 10 uL                                  |              |                        |
| Date Acquired    | : 9/8/2021 5:02:54 AM                    | Acquired by  | : System Administrator |
| Date Processed   | : 9/8/2021 10:30:52 AM                   | Processed by | : System Administrator |

## <Chromatogram>

mAU

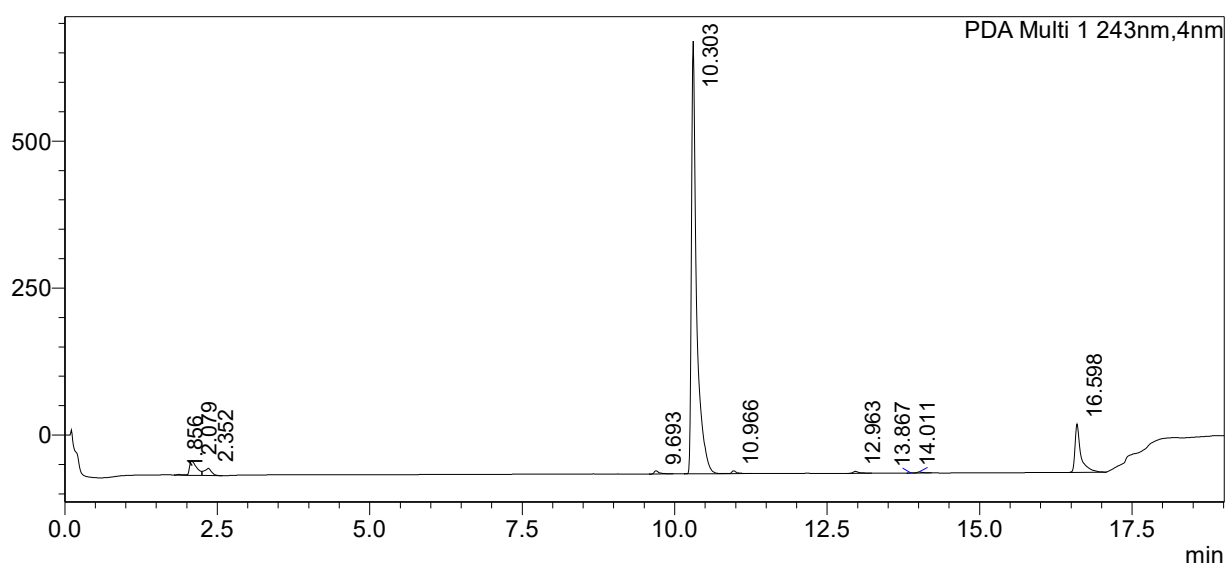

mAU

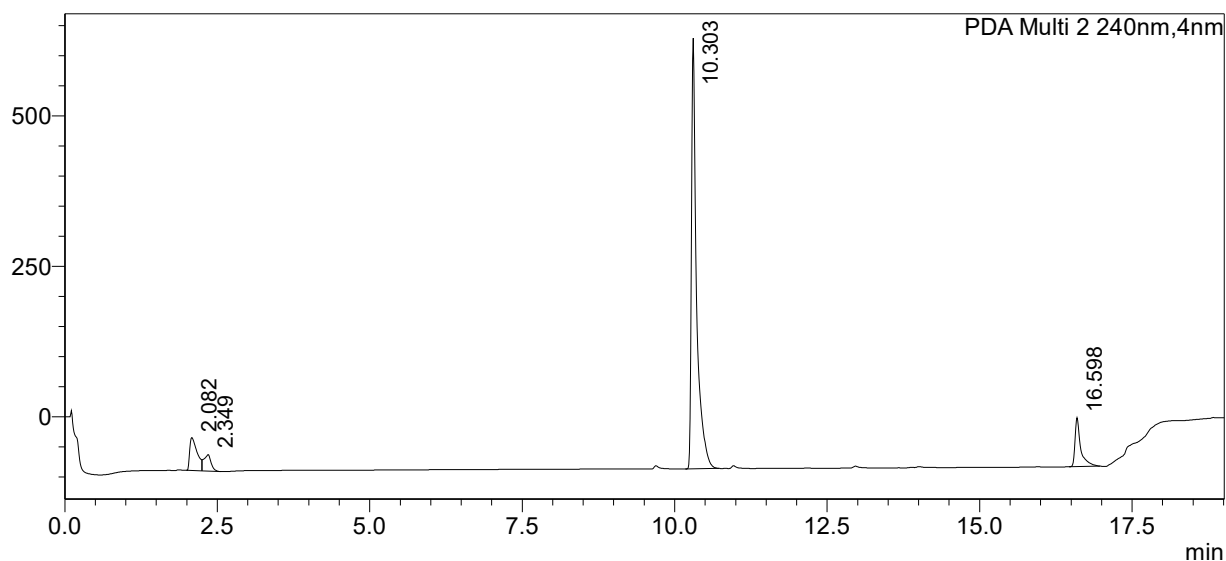

## <Peak Table>

PDA Ch1 243nm

| Peak# | Ret. Time | Area    | Height | Conc.   | Unit | Mark | Name |
|-------|-----------|---------|--------|---------|------|------|------|
| 1     | 1.856     | 9090    | 1023   | 0.000   |      |      |      |
| 2     | 2.079     | 204331  | 24304  | 0.000   |      | V    |      |
| 3     | 2.352     | 98509   | 11947  | 0.000   |      | V    |      |
| 4     | 9.693     | 32478   | 5503   | -2.567  | uM   |      | MHET |
| 5     | 10.303    | 4373374 | 736075 | 446.641 | uM   |      | BHET |
| 6     | 10.966    | 30307   | 4931   | 0.000   |      | V    |      |
| 7     | 12.963    | 21878   | 3269   | 0.000   |      |      |      |
| 8     | 13.867    | 3645    | 690    | 0.000   |      |      |      |
| 9     | 14.011    | 11395   | 1739   | 0.000   |      | V    |      |
| 10    | 16.598    | 542347  | 82006  | 0.000   |      |      |      |
| Total |           | 5327355 | 871487 |         |      |      |      |

## PDA Ch2 240nm

| Peak# | Ret. Time | Area    | Height | Conc. | Unit | Mark | Name |
|-------|-----------|---------|--------|-------|------|------|------|
| 1     | 2.082     | 477948  | 54609  | 0.000 |      |      |      |
| 2     | 2.349     | 221586  | 27334  | 0.000 |      | V    |      |
| 3     | 10.303    | 4236645 | 715402 | 0.000 |      |      |      |
| 4     | 16.598    | 523463  | 81123  | 0.000 |      |      |      |
| Total |           | 5459643 | 878468 |       |      |      |      |
