# Supplementary material for: A flexible kinetic assay efficiently sorts prospective biocatalysts for PET plastic subunit hydrolysis
Source: Royal Society of Chemistry journal article supplement (doi:10.1039/d2ra00612j), 2022-01-01
Supplement: d2ra00612j1.zip [file 24 hr Control 50C pH8.pdf › 2021 Beech BHET SI/HPLC PDF Reports/50C pH8/24 hr Control 50C pH8.pdf]

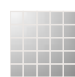SHIMADZU  
LabSolutions

## Analysis Report

## &lt;Sample Information&gt;

|                  |                                        |              |                        |
|------------------|----------------------------------------|--------------|------------------------|
| Sample Name      | : 24 hr Control ER1 50C                |              |                        |
| Sample ID        | :                                      |              |                        |
| Data Filename    | : 24 hr Control ER1 50C_029.lcd        |              |                        |
| Method Filename  | : MHET_BHET_rpamide_060721.lcm         |              |                        |
| Batch Filename   | : BHET_Colorimetric_50C_pH8_plate1.lcb |              |                        |
| Vial #           | : 4-19                                 | Sample Type  | : Unknown              |
| Injection Volume | : 10 uL                                |              |                        |
| Date Acquired    | : 8/30/2021 9:36:53 PM                 | Acquired by  | : System Administrator |
| Date Processed   | : 9/3/2021 8:52:17 AM                  | Processed by | : System Administrator |

## &lt;Chromatogram&gt;

mAU

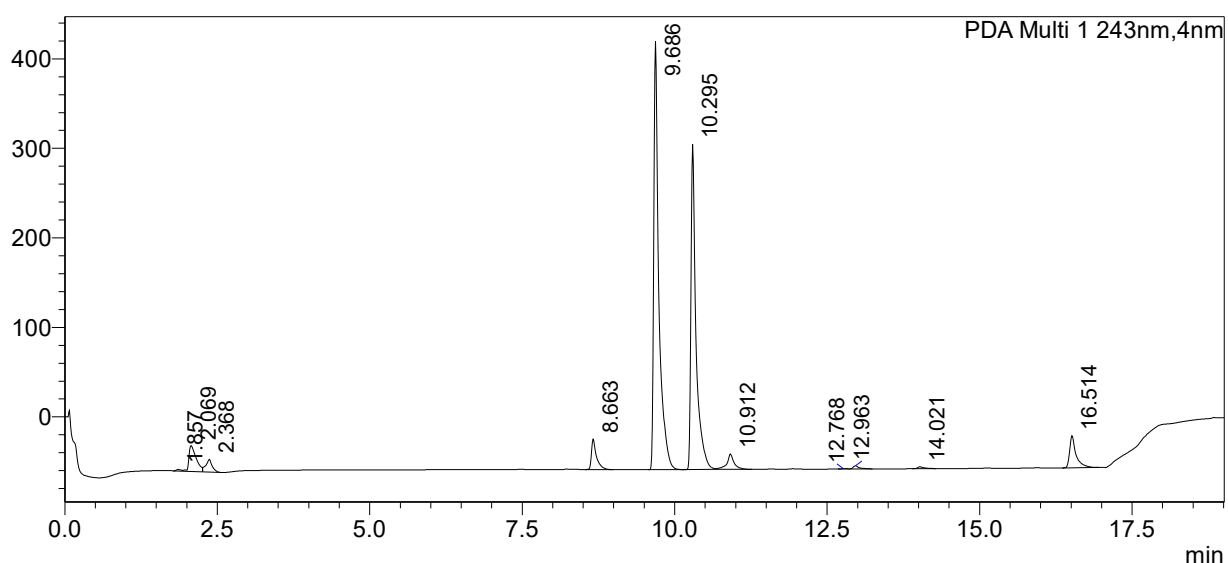

mAU

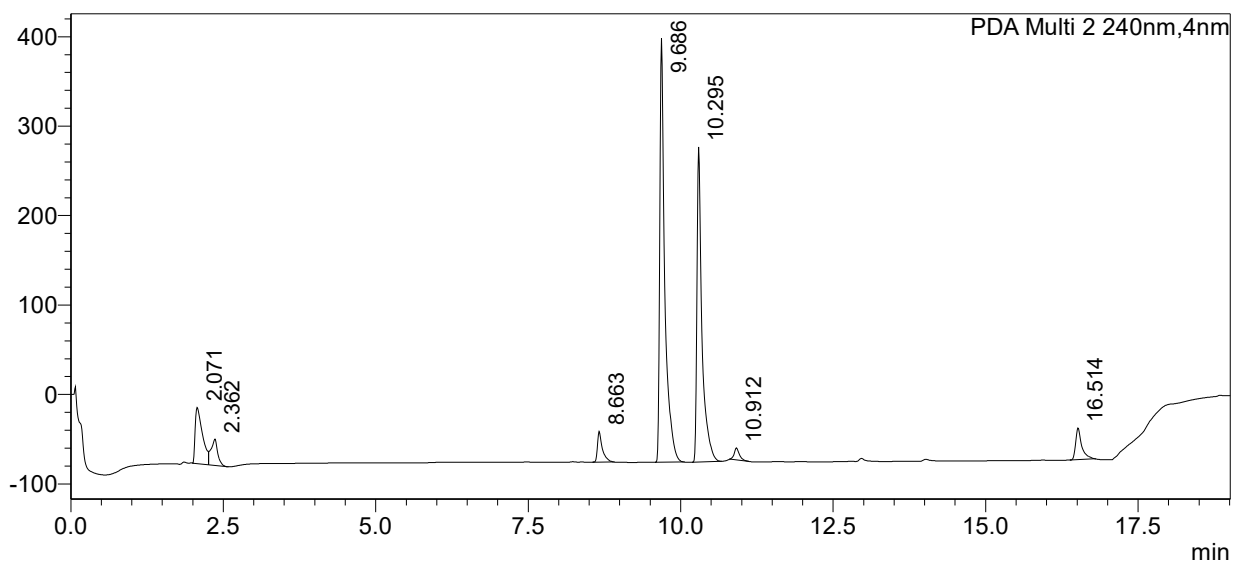

## &lt;Peak Table&gt;

PDA Ch1 243nm

| Peak# | Ret. Time | Area    | Height | Conc.   | Unit | Mark | Name |
|-------|-----------|---------|--------|---------|------|------|------|
| 1     | 1.857     | 10162   | 1806   | 0.000   |      |      |      |
| 2     | 2.069     | 243078  | 29013  | 0.000   |      | V    |      |
| 3     | 2.368     | 101415  | 14263  | 0.000   |      | V    |      |
| 4     | 8.663     | 194752  | 33896  | 0.000   |      |      |      |
| 5     | 9.686     | 2790186 | 478676 | 266.505 | uM   |      | MHET |
| 6     | 10.295    | 2126288 | 363040 | 209.850 | uM   | V    | BHET |
| 7     | 10.912    | 143272  | 17191  | 0.000   |      | V    |      |
| 8     | 12.768    | 3136    | 477    | 0.000   |      |      |      |
| 9     | 12.963    | 23687   | 3576   | 0.000   |      | V    |      |
| 10    | 14.021    | 15462   | 2030   | 0.000   |      |      |      |
| 11    | 16.514    | 263938  | 35788  | 0.000   |      |      |      |
| Total |           | 5915375 | 979755 |         |      |      |      |

## PDA Ch2 240nm

| Peak# | Ret. Time | Area    | Height  | Conc.  | Unit | Mark | Name |
|-------|-----------|---------|---------|--------|------|------|------|
| 1     | 2.071     | 540237  | 62890   | 0.000  |      |      |      |
| 2     | 2.362     | 218772  | 29465   | 0.000  |      | V    |      |
| 3     | 8.663     | 191817  | 34078   | 15.052 | uM   |      | TPA  |
| 4     | 9.686     | 2756869 | 474156  | 0.000  |      |      |      |
| 5     | 10.295    | 2048640 | 352200  | 0.000  |      |      |      |
| 6     | 10.912    | 80153   | 13413   | 0.000  |      |      |      |
| 7     | 16.514    | 249390  | 35612   | 0.000  |      |      |      |
| Total |           | 6085878 | 1001813 |        |      |      |      |
