# Supplementary material for: A flexible kinetic assay efficiently sorts prospective biocatalysts for PET plastic subunit hydrolysis
Source: Royal Society of Chemistry journal article supplement (doi:10.1039/d2ra00612j), 2022-01-01
Supplement: d2ra00612j1.zip [file 24 hr Control pH7 37C.pdf › 2021 Beech BHET SI/HPLC PDF Reports/37C pH7/24 hr Control pH7 37C.pdf]

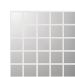

SHIMADZU  
LabSolutions

# Analysis Report

## <Sample Information>

|                  |                                          |              |                        |
|------------------|------------------------------------------|--------------|------------------------|
| Sample Name      | : 24 hr Control ER1 pH7                  |              |                        |
| Sample ID        | :                                        |              |                        |
| Data Filename    | : 24 hr Control ER1 pH7_030.lcd          |              |                        |
| Method Filename  | : MHET_BHET_rpamide_060721.lcm           |              |                        |
| Batch Filename   | : BHET_Colorimetric_37C_pH7_09072021.lcb |              |                        |
| Vial #           | : 3-14                                   | Sample Type  | : Unknown              |
| Injection Volume | : 10 uL                                  |              |                        |
| Date Acquired    | : 9/7/2021 10:55:25 PM                   | Acquired by  | : System Administrator |
| Date Processed   | : 9/8/2021 10:30:17 AM                   | Processed by | : System Administrator |

## <Chromatogram>

mAU

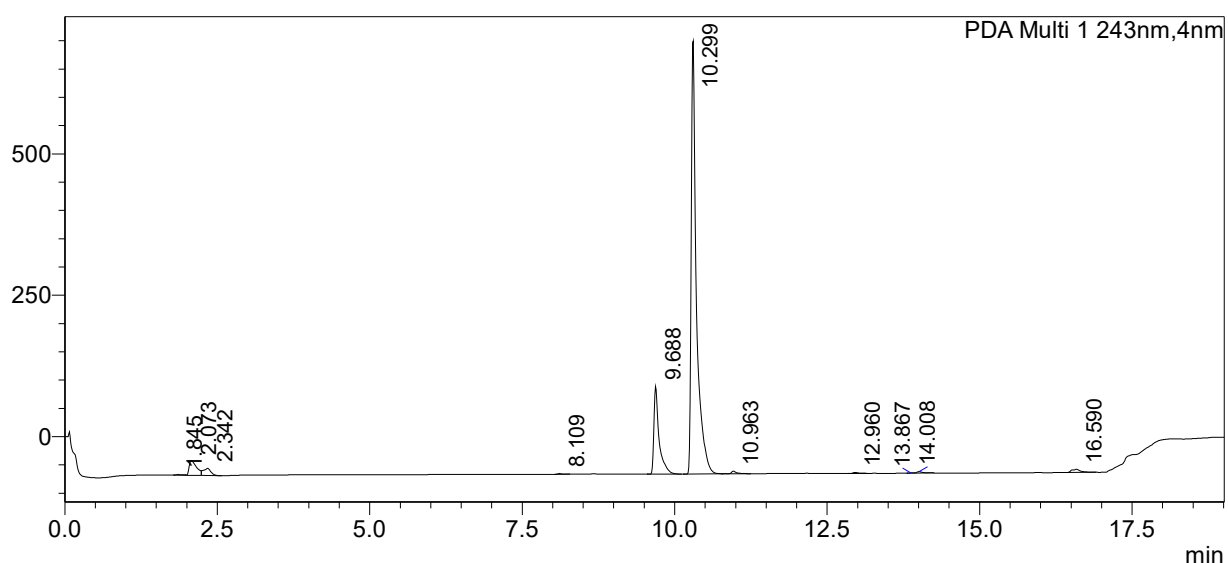

mAU

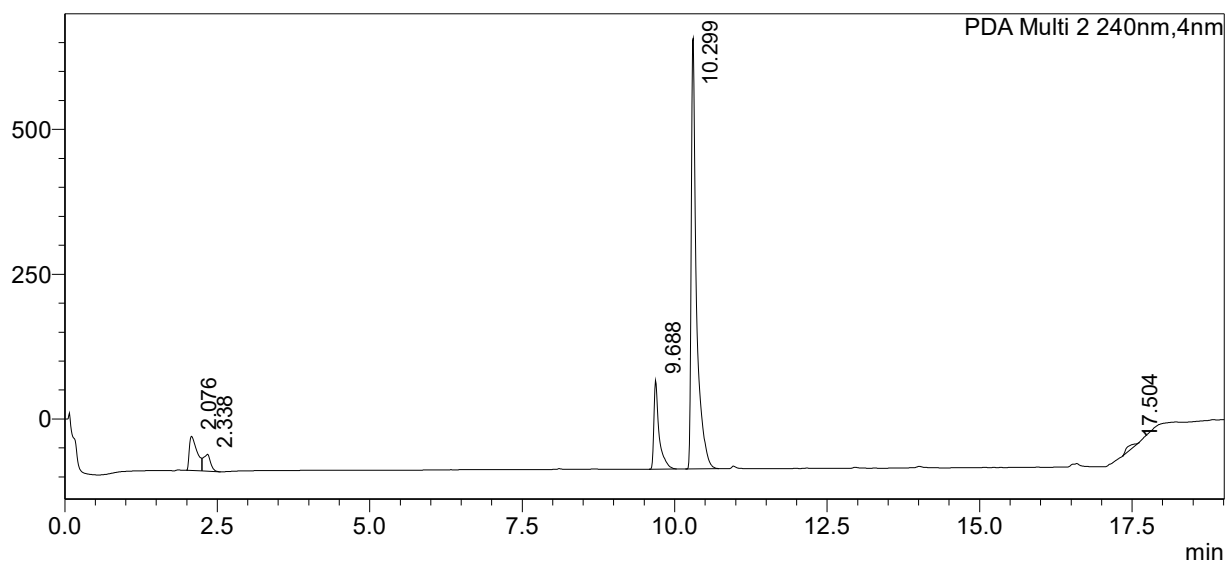

## <Peak Table>

PDA Ch1 243nm

| Peak# | Ret. Time | Area    | Height | Conc.   | Unit | Mark | Name |
|-------|-----------|---------|--------|---------|------|------|------|
| 1     | 1.845     | 10013   | 1122   | 0.000   |      |      |      |
| 2     | 2.073     | 226442  | 26171  | 0.000   |      | V    |      |
| 3     | 2.342     | 108462  | 12787  | 0.000   |      | V    |      |
| 4     | 8.109     | 5898    | 1244   | 0.000   |      |      |      |
| 5     | 9.688     | 921253  | 155036 | 81.925  | uM   |      | MHET |
| 6     | 10.299    | 4634348 | 765428 | 474.487 | uM   |      | BHET |
| 7     | 10.963    | 29664   | 4782   | 0.000   |      | V    |      |
| 8     | 12.960    | 10779   | 1683   | 0.000   |      |      |      |
| 9     | 13.867    | 3738    | 743    | 0.000   |      |      |      |
| 10    | 14.008    | 18639   | 2639   | 0.000   |      | V    |      |
| 11    | 16.590    | 59822   | 5890   | 0.000   |      |      |      |
| Total |           | 6029057 | 977524 |         |      |      |      |

## PDA Ch2 240nm

| Peak# | Ret. Time | Area    | Height | Conc. | Unit | Mark | Name |
|-------|-----------|---------|--------|-------|------|------|------|
| 1     | 2.076     | 542924  | 58986  | 0.000 |      |      |      |
| 2     | 2.338     | 231622  | 29345  | 0.000 |      | V    |      |
| 3     | 9.688     | 904306  | 153211 | 0.000 |      |      |      |
| 4     | 10.299    | 4489777 | 743877 | 0.000 |      |      |      |
| 5     | 17.504    | 86414   | 6211   | 0.000 |      |      |      |
| Total |           | 6255042 | 991629 |       |      |      |      |
