# Supplementary material for: A flexible kinetic assay efficiently sorts prospective biocatalysts for PET plastic subunit hydrolysis
Source: Royal Society of Chemistry journal article supplement (doi:10.1039/d2ra00612j), 2022-01-01
Supplement: d2ra00612j1.zip [file E1 37C pH8.pdf › 2021 Beech BHET SI/HPLC PDF Reports/37C pH8/E1 37C pH8.pdf]

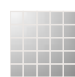SHIMADZU  
LabSolutions

## Analysis Report

## &lt;Sample Information&gt;

|                  |                                               |                                     |
|------------------|-----------------------------------------------|-------------------------------------|
| Sample Name      | : E1                                          |                                     |
| Sample ID        | :                                             |                                     |
| Data Filename    | : E1_006.lcd                                  |                                     |
| Method Filename  | : MHET_BHET_rpamide_060721.lcm                |                                     |
| Batch Filename   | : BHET_Colorimetric_37C_pH8_plate1_RECALC.lcb |                                     |
| Vial #           | : 4-19                                        | Sample Type : Unknown               |
| Injection Volume | : 10 uL                                       |                                     |
| Date Acquired    | : 8/24/2021 9:39:39 AM                        | Acquired by : System Administrator  |
| Date Processed   | : 9/3/2021 9:16:19 AM                         | Processed by : System Administrator |

## &lt;Chromatogram&gt;

mAU

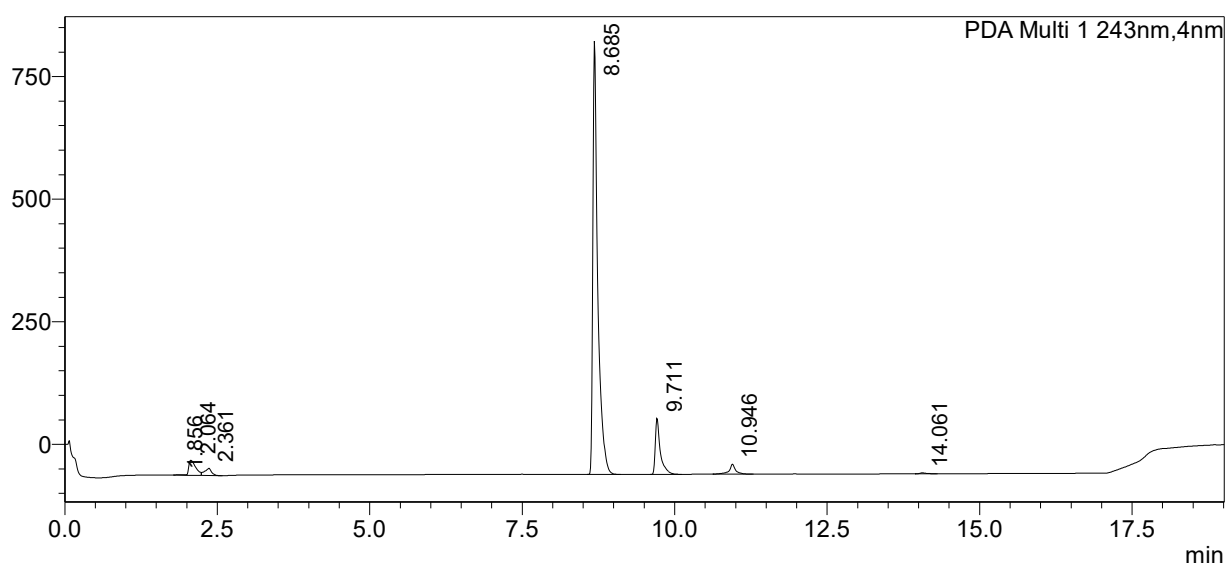

mAU

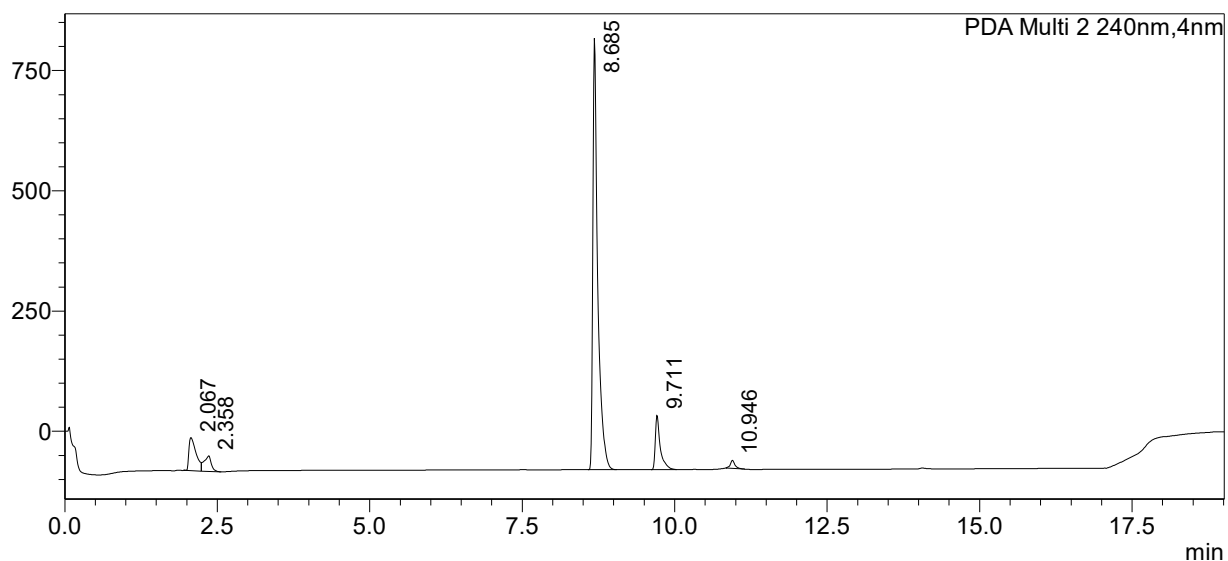

## &lt;Peak Table&gt;

PDA Ch1 243nm

| Peak# | Ret. Time | Area    | Height  | Conc.  | Unit | Mark | Name |
|-------|-----------|---------|---------|--------|------|------|------|
| 1     | 1.856     | 11012   | 1174    | 0.000  |      |      |      |
| 2     | 2.064     | 248544  | 30930   | 0.000  |      | V    |      |
| 3     | 2.361     | 115377  | 14667   | 0.000  |      | V    |      |
| 4     | 8.685     | 4993544 | 883628  | 0.000  |      |      |      |
| 5     | 9.711     | 656641  | 113940  | 57.341 | uM   |      | MHET |
| 6     | 10.946    | 151375  | 20672   | 0.000  |      |      |      |
| 7     | 14.061    | 14113   | 1982    | 0.000  |      |      |      |
| Total |           | 6190606 | 1066993 |        |      |      |      |

## PDA Ch2 240nm

| Peak# | Ret. Time | Area    | Height  | Conc.   | Unit | Mark | Name |
|-------|-----------|---------|---------|---------|------|------|------|
| 1     | 2.067     | 575060  | 68773   | 0.000   |      |      |      |
| 2     | 2.358     | 259428  | 32504   | 0.000   |      | V    |      |
| 3     | 8.685     | 5051996 | 896992  | 487.791 | uM   |      | TPA  |
| 4     | 9.711     | 644336  | 112610  | 0.000   |      |      |      |
| 5     | 10.946    | 87262   | 16596   | 0.000   |      |      |      |
| Total |           | 6618083 | 1127475 |         |      |      |      |
