# Supplementary material for: A flexible kinetic assay efficiently sorts prospective biocatalysts for PET plastic subunit hydrolysis
Source: Royal Society of Chemistry journal article supplement (doi:10.1039/d2ra00612j), 2022-01-01
Supplement: d2ra00612j1.zip [file E1 50C pH8.pdf › 2021 Beech BHET SI/HPLC PDF Reports/50C pH8/E1 50C pH8.pdf]

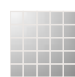**SHIMADZU**  
**LabSolutions**

# Analysis Report

## <Sample Information>

|                  |                                        |                                     |
|------------------|----------------------------------------|-------------------------------------|
| Sample Name      | : E1 50C                               |                                     |
| Sample ID        | :                                      |                                     |
| Data Filename    | : E1 50C_017.lcd                       |                                     |
| Method Filename  | : MHET_BHET_rpamide_060721.lcm         |                                     |
| Batch Filename   | : BHET_Colorimetric_50C_pH8_plate1.lcb |                                     |
| Vial #           | : 4-7                                  | Sample Type : Unknown               |
| Injection Volume | : 10 uL                                |                                     |
| Date Acquired    | : 8/30/2021 5:44:29 PM                 | Acquired by : System Administrator  |
| Date Processed   | : 9/3/2021 8:51:55 AM                  | Processed by : System Administrator |

## <Chromatogram>

mAU

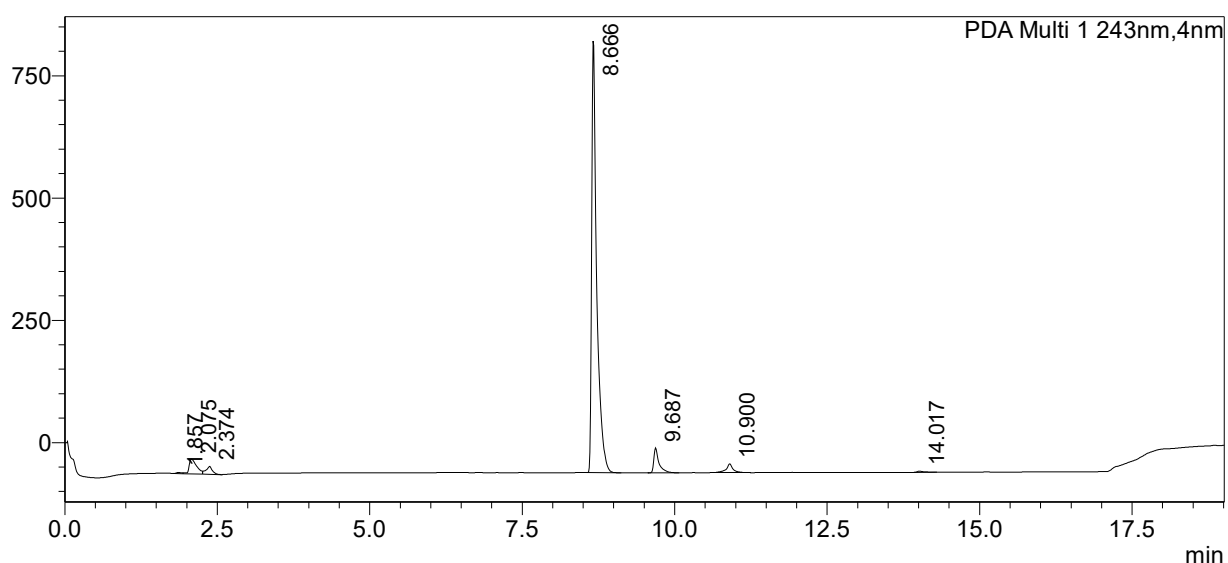

mAU

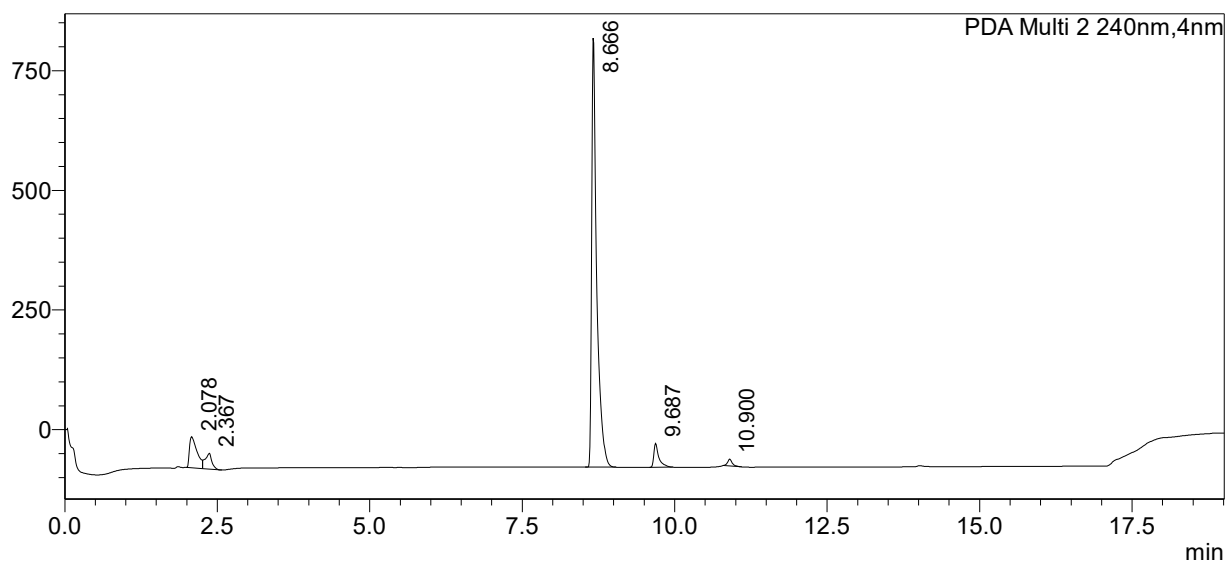

## <Peak Table>

PDA Ch1 243nm

| Peak# | Ret. Time | Area    | Height  | Conc.  | Unit | Mark | Name |
|-------|-----------|---------|---------|--------|------|------|------|
| 1     | 1.857     | 15172   | 2520    | 0.000  |      |      |      |
| 2     | 2.075     | 266339  | 30187   | 0.000  |      | V    |      |
| 3     | 2.374     | 117023  | 16474   | 0.000  |      | V    |      |
| 4     | 8.666     | 5148691 | 882369  | 0.000  |      |      |      |
| 5     | 9.687     | 296793  | 50979   | 24.228 | uM   |      | MHET |
| 6     | 10.900    | 138798  | 18203   | 0.000  |      |      |      |
| 7     | 14.017    | 18494   | 2406    | 0.000  |      |      |      |
| Total |           | 6001308 | 1003138 |        |      |      |      |

## PDA Ch2 240nm

| Peak# | Ret. Time | Area    | Height  | Conc.   | Unit | Mark | Name |
|-------|-----------|---------|---------|---------|------|------|------|
| 1     | 2.078     | 577192  | 65103   | 0.000   |      |      |      |
| 2     | 2.367     | 249655  | 33444   | 0.000   |      | V    |      |
| 3     | 8.666     | 5210057 | 896168  | 503.702 | uM   |      | TPA  |
| 4     | 9.687     | 286485  | 50275   | 0.000   |      |      |      |
| 5     | 10.900    | 77334   | 14308   | 0.000   |      |      |      |
| Total |           | 6400722 | 1059299 |         |      |      |      |
