# Supplementary material for: A flexible kinetic assay efficiently sorts prospective biocatalysts for PET plastic subunit hydrolysis
Source: Royal Society of Chemistry journal article supplement (doi:10.1039/d2ra00612j), 2022-01-01
Supplement: d2ra00612j1.zip [file E1 pH7 37C.pdf › 2021 Beech BHET SI/HPLC PDF Reports/37C pH7/E1 pH7 37C.pdf]

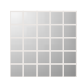SHIMADZU  
LabSolutions

## Analysis Report

## &lt;Sample Information&gt;

|                  |                                          |                                     |
|------------------|------------------------------------------|-------------------------------------|
| Sample Name      | : E1 pH7                                 |                                     |
| Sample ID        | :                                        |                                     |
| Data Filename    | : E1 pH7_019.lcd                         |                                     |
| Method Filename  | : MHET_BHET_rpamide_060721.lcm           |                                     |
| Batch Filename   | : BHET_Colorimetric_37C_pH7_09072021.lcb |                                     |
| Vial #           | : 3-3                                    | Sample Type : Unknown               |
| Injection Volume | : 10 uL                                  |                                     |
| Date Acquired    | : 9/7/2021 7:22:41 PM                    | Acquired by : System Administrator  |
| Date Processed   | : 9/8/2021 10:29:57 AM                   | Processed by : System Administrator |

## &lt;Chromatogram&gt;

mAU

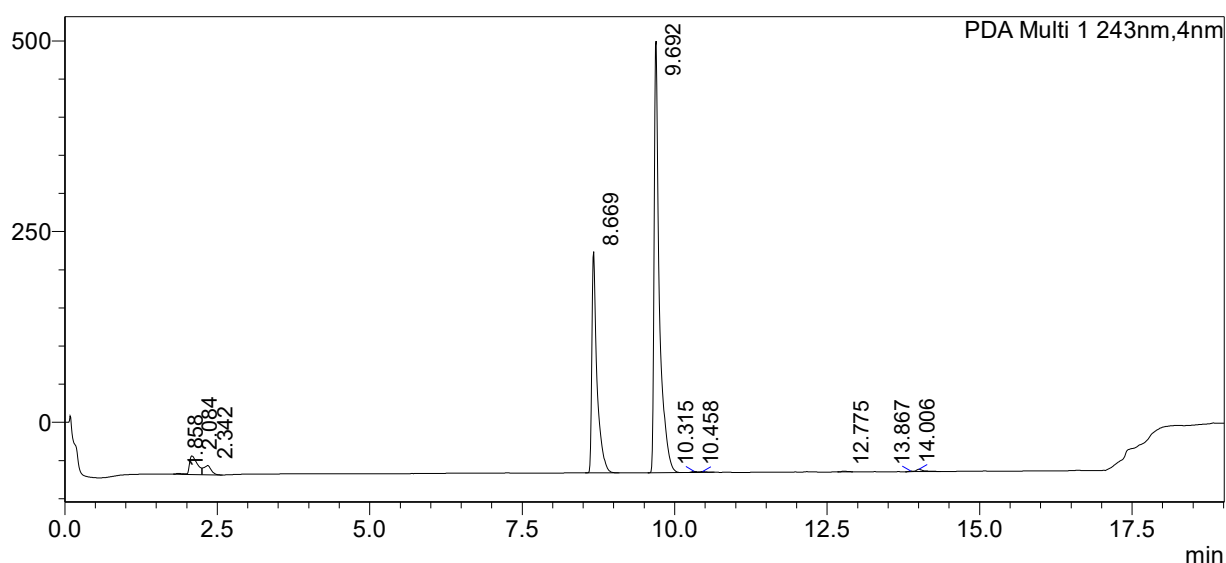

mAU

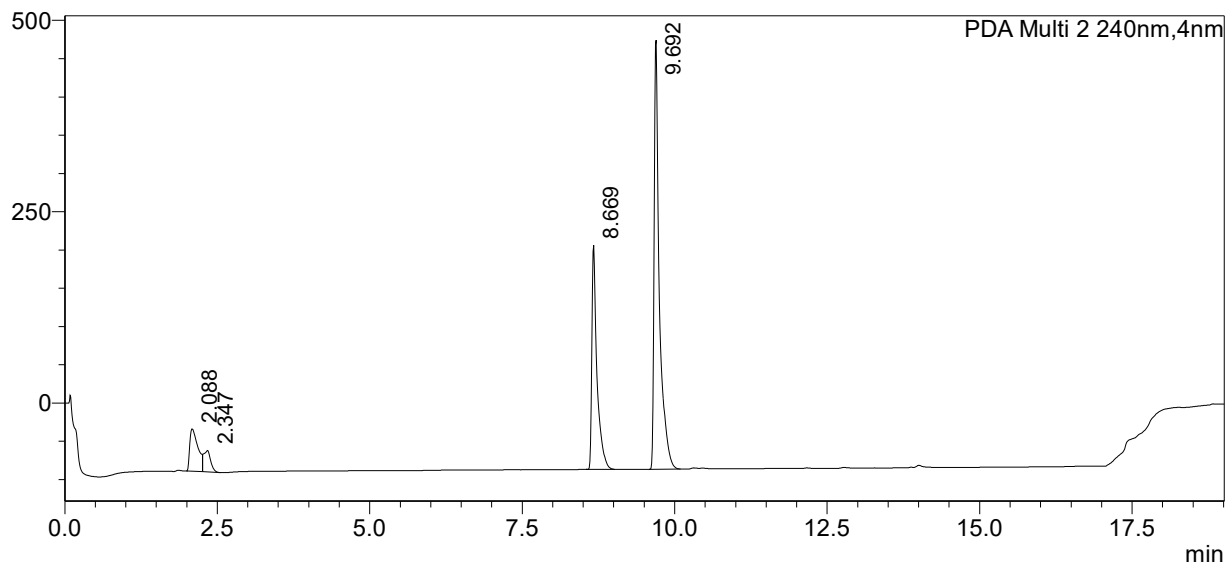

## &lt;Peak Table&gt;

PDA Ch1 243nm

| Peak# | Ret. Time | Area    | Height | Conc.   | Unit | Mark | Name |
|-------|-----------|---------|--------|---------|------|------|------|
| 1     | 1.858     | 7486    | 1227   | 0.000   |      |      |      |
| 2     | 2.084     | 225737  | 24326  | 0.000   |      | V    |      |
| 3     | 2.342     | 101521  | 12106  | 0.000   |      | V    |      |
| 4     | 8.669     | 1712815 | 290059 | 0.000   |      |      |      |
| 5     | 9.692     | 3413818 | 565814 | 324.502 | uM   |      | MHET |
| 6     | 10.315    | 10768   | 1526   | -4.895  | uM   |      | BHET |
| 7     | 10.458    | 8155    | 1255   | 0.000   |      | V    |      |
| 8     | 12.775    | 5684    | 1017   | 0.000   |      |      |      |
| 9     | 13.867    | 4080    | 786    | 0.000   |      |      |      |
| 10    | 14.006    | 25396   | 3060   | 0.000   |      | V    |      |
| Total |           | 5515460 | 901177 |         |      |      |      |

## PDA Ch2 240nm

| Peak# | Ret. Time | Area    | Height | Conc.   | Unit | Mark | Name |
|-------|-----------|---------|--------|---------|------|------|------|
| 1     | 2.088     | 535721  | 55277  | 0.000   |      |      |      |
| 2     | 2.347     | 214063  | 27594  | 0.000   |      | V    |      |
| 3     | 8.669     | 1723938 | 292729 | 161.765 | uM   |      | TPA  |
| 4     | 9.692     | 3375466 | 560667 | 0.000   |      |      |      |
| Total |           | 5849188 | 936267 |         |      |      |      |
