# Supplementary material for: A flexible kinetic assay efficiently sorts prospective biocatalysts for PET plastic subunit hydrolysis
Source: Royal Society of Chemistry journal article supplement (doi:10.1039/d2ra00612j), 2022-01-01
Supplement: d2ra00612j1.zip [file E2 37C pH8.pdf › 2021 Beech BHET SI/HPLC PDF Reports/37C pH8/E2 37C pH8.pdf]

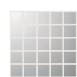SHIMADZU  
LabSolutions

## Analysis Report

## &lt;Sample Information&gt;

|                  |                                               |                                     |
|------------------|-----------------------------------------------|-------------------------------------|
| Sample Name      | : E2                                          |                                     |
| Sample ID        | :                                             |                                     |
| Data Filename    | : E2_009.lcd                                  |                                     |
| Method Filename  | : MHET_BHET_rpamide_060721.lcm                |                                     |
| Batch Filename   | : BHET_Colorimetric_37C_pH8_plate1_RECALC.lcb |                                     |
| Vial #           | : 4-22                                        | Sample Type : Unknown               |
| Injection Volume | : 10 uL                                       |                                     |
| Date Acquired    | : 8/24/2021 10:37:44 AM                       | Acquired by : System Administrator  |
| Date Processed   | : 9/3/2021 9:16:14 AM                         | Processed by : System Administrator |

## &lt;Chromatogram&gt;

mAU

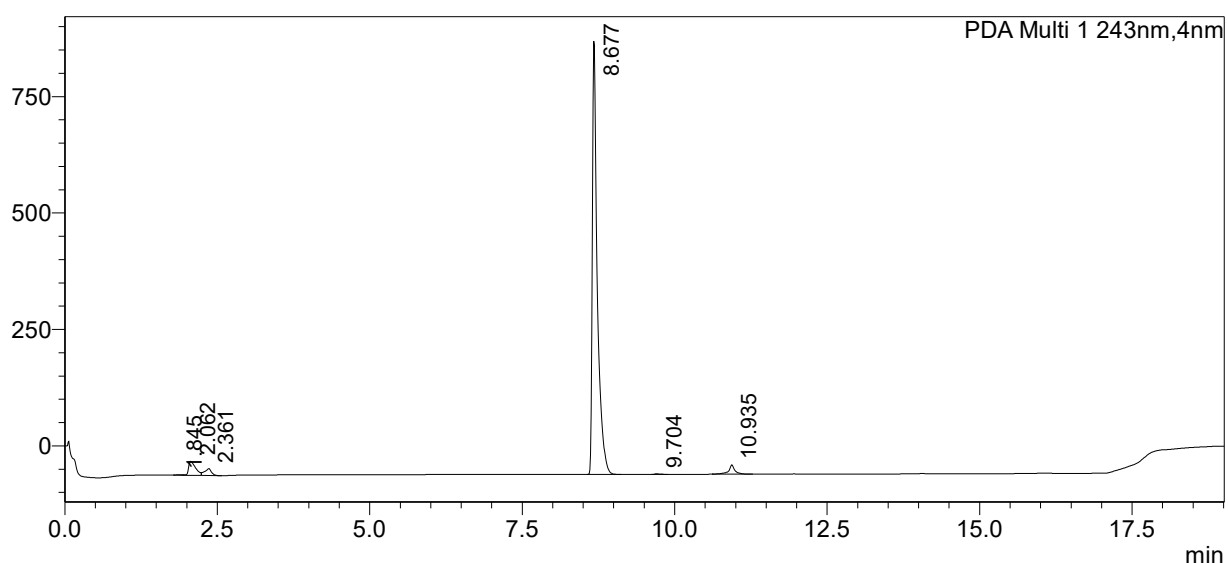

mAU

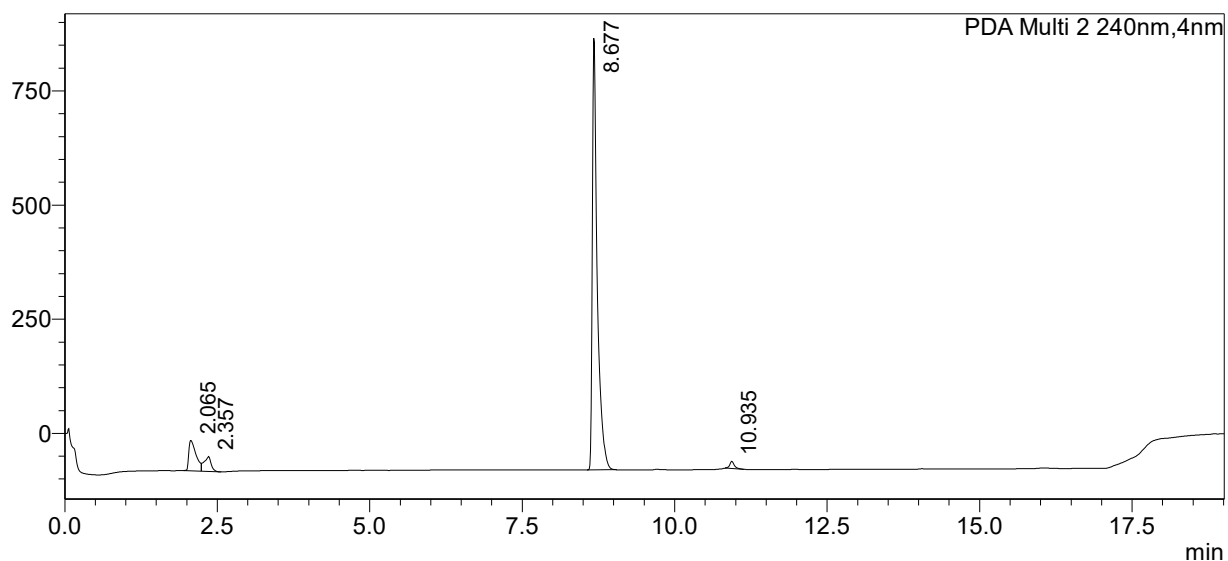

## &lt;Peak Table&gt;

PDA Ch1 243nm

| Peak# | Ret. Time | Area    | Height | Conc.  | Unit | Mark | Name |
|-------|-----------|---------|--------|--------|------|------|------|
| 1     | 1.845     | 5732    | 691    | 0.000  |      |      |      |
| 2     | 2.062     | 246468  | 30008  | 0.000  |      | V    |      |
| 3     | 2.361     | 115166  | 14915  | 0.000  |      | V    |      |
| 4     | 8.677     | 5324395 | 930305 | 0.000  |      |      |      |
| 5     | 9.704     | 7256    | 1390   | -2.414 | uM   |      | MHET |
| 6     | 10.935    | 146489  | 19944  | 0.000  |      |      |      |
| Total |           | 5845505 | 997253 |        |      |      |      |

## PDA Ch2 240nm

| Peak# | Ret. Time | Area    | Height  | Conc.   | Unit | Mark | Name |
|-------|-----------|---------|---------|---------|------|------|------|
| 1     | 2.065     | 560383  | 66318   | 0.000   |      |      |      |
| 2     | 2.357     | 256714  | 32598   | 0.000   |      | V    |      |
| 3     | 8.677     | 5389424 | 945277  | 524.870 | uM   |      | TPA  |
| 4     | 10.935    | 83874   | 15983   | 0.000   |      |      |      |
| Total |           | 6290395 | 1060175 |         |      |      |      |
