# Supplementary material for: A flexible kinetic assay efficiently sorts prospective biocatalysts for PET plastic subunit hydrolysis
Source: Royal Society of Chemistry journal article supplement (doi:10.1039/d2ra00612j), 2022-01-01
Supplement: d2ra00612j1.zip [file E2 50C pH8.pdf › 2021 Beech BHET SI/HPLC PDF Reports/50C pH8/E2 50C pH8.pdf]

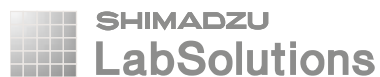

# Analysis Report

## <Sample Information>

|                  |                                        |                                     |
|------------------|----------------------------------------|-------------------------------------|
| Sample Name      | : E2 50C                               |                                     |
| Sample ID        | :                                      |                                     |
| Data Filename    | : E2 50C_020.lcd                       |                                     |
| Method Filename  | : MHET_BHET_rpamide_060721.lcm         |                                     |
| Batch Filename   | : BHET_Colorimetric_50C_pH8_plate1.lcb |                                     |
| Vial #           | : 4-10                                 | Sample Type : Unknown               |
| Injection Volume | : 10 uL                                |                                     |
| Date Acquired    | : 8/30/2021 6:42:36 PM                 | Acquired by : System Administrator  |
| Date Processed   | : 9/3/2021 8:52:01 AM                  | Processed by : System Administrator |

## <Chromatogram>

mAU

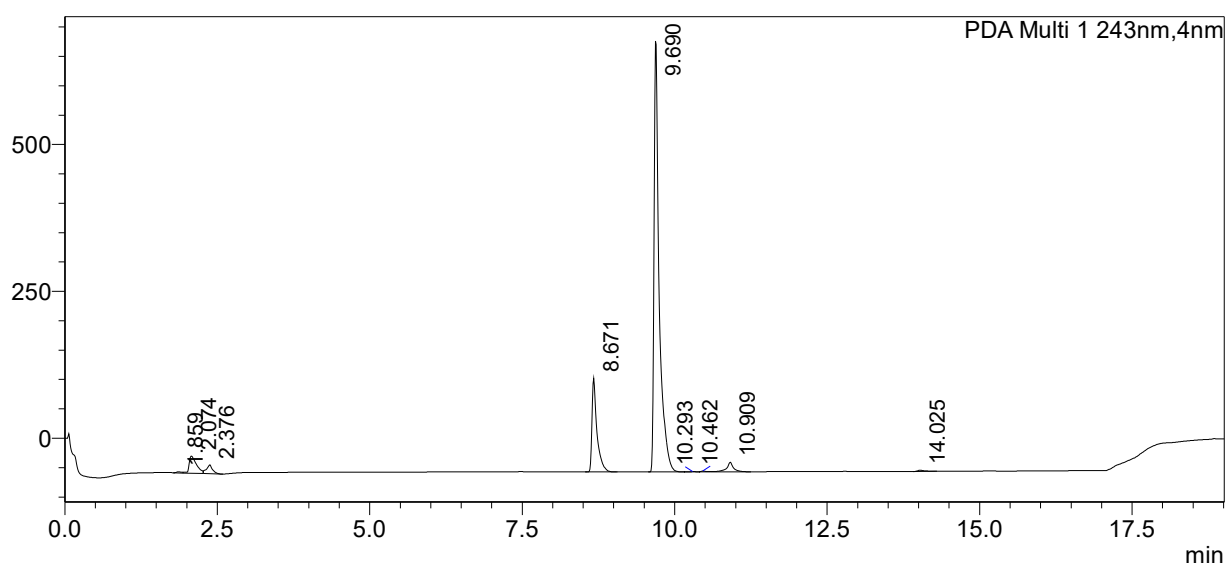

mAU

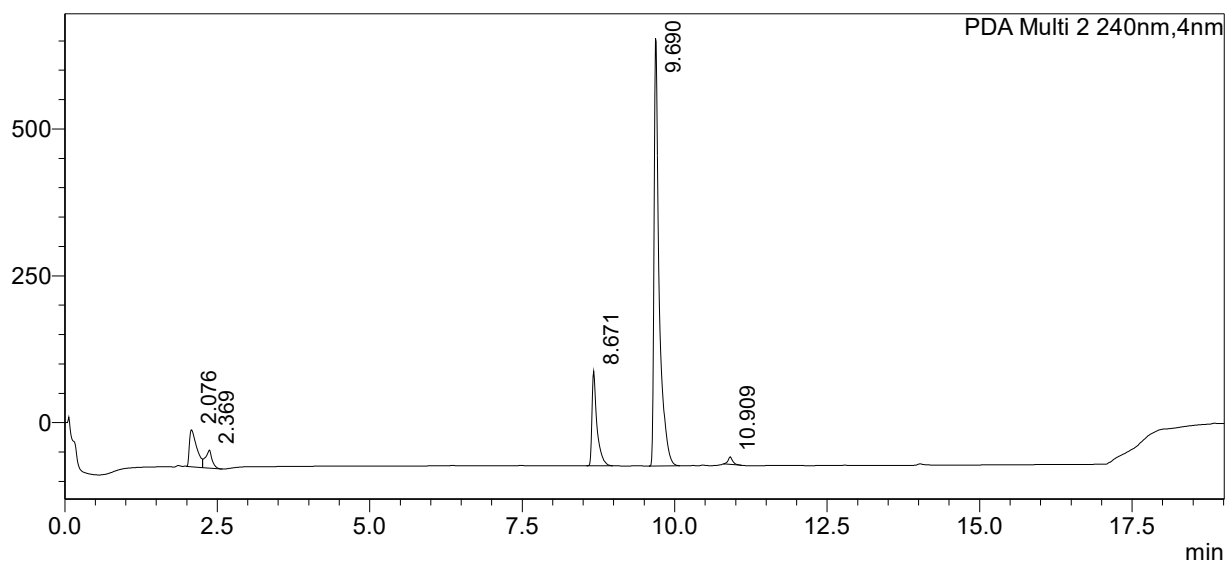

## <Peak Table>

PDA Ch1 243nm

| Peak# | Ret. Time | Area    | Height | Conc.   | Unit | Mark | Name |
|-------|-----------|---------|--------|---------|------|------|------|
| 1     | 1.859     | 11648   | 1922   | 0.000   |      |      |      |
| 2     | 2.074     | 247786  | 29187  | 0.000   |      | V    |      |
| 3     | 2.376     | 102414  | 15081  | 0.000   |      | V    |      |
| 4     | 8.671     | 910509  | 159148 | 0.000   |      |      |      |
| 5     | 9.690     | 4332931 | 733481 | 409.411 | uM   |      | MHET |
| 6     | 10.293    | 3430    | 613    | -2.372  | uM   | V    | BHET |
| 7     | 10.462    | 8170    | 1479   | 0.000   |      | V    |      |
| 8     | 10.909    | 129820  | 16397  | 0.000   |      | V    |      |
| 9     | 14.025    | 16418   | 2138   | 0.000   |      |      |      |
| Total |           | 5763127 | 959444 |         |      |      |      |

## PDA Ch2 240nm

| Peak# | Ret. Time | Area    | Height | Conc.  | Unit | Mark | Name |
|-------|-----------|---------|--------|--------|------|------|------|
| 1     | 2.076     | 538554  | 62973  | 0.000  |      |      |      |
| 2     | 2.369     | 227537  | 30721  | 0.000  |      | V    |      |
| 3     | 8.671     | 915382  | 160578 | 82.732 | uM   |      | TPA  |
| 4     | 9.690     | 4289580 | 728154 | 0.000  |      |      |      |
| 5     | 10.909    | 68044   | 12703  | 0.000  |      |      |      |
| Total |           | 6039096 | 995128 |        |      |      |      |
