# Supplementary material for: A flexible kinetic assay efficiently sorts prospective biocatalysts for PET plastic subunit hydrolysis
Source: Royal Society of Chemistry journal article supplement (doi:10.1039/d2ra00612j), 2022-01-01
Supplement: d2ra00612j1.zip [file E2 pH7 37C.pdf › 2021 Beech BHET SI/HPLC PDF Reports/37C pH7/E2 pH7 37C.pdf]

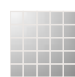SHIMADZU  
LabSolutions

## Analysis Report

## &lt;Sample Information&gt;

|                  |                                          |              |                        |
|------------------|------------------------------------------|--------------|------------------------|
| Sample Name      | : E2 pH7                                 |              |                        |
| Sample ID        | :                                        |              |                        |
| Data Filename    | : E2 pH7_040.lcd                         |              |                        |
| Method Filename  | : MHET_BHET_rpamide_060721.lcm           |              |                        |
| Batch Filename   | : BHET_Colorimetric_37C_pH7_09072021.lcb |              |                        |
| Vial #           | : 3-24                                   | Sample Type  | : Unknown              |
| Injection Volume | : 10 uL                                  |              |                        |
| Date Acquired    | : 9/8/2021 2:08:49 AM                    | Acquired by  | : System Administrator |
| Date Processed   | : 9/8/2021 10:30:36 AM                   | Processed by | : System Administrator |

## &lt;Chromatogram&gt;

mAU

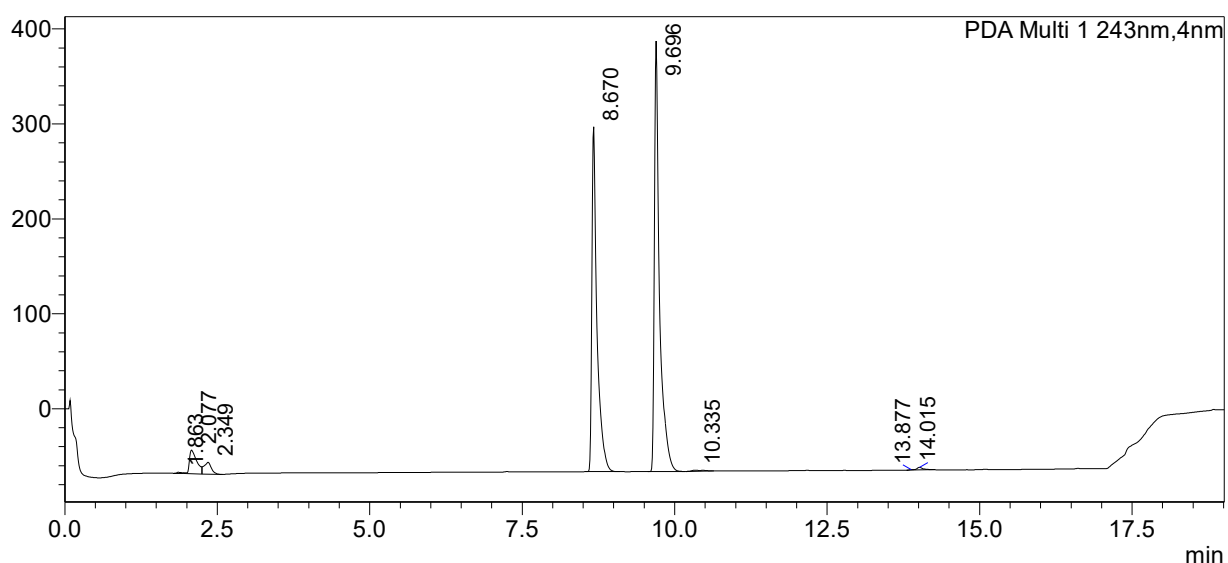

mAU

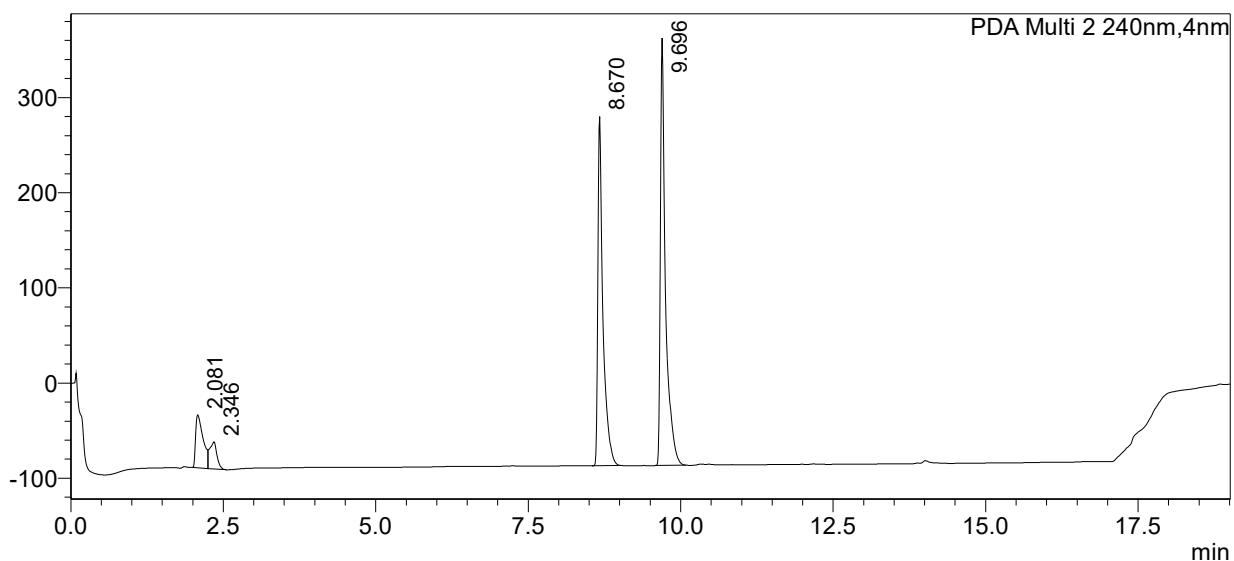

## &lt;Peak Table&gt;

PDA Ch1 243nm

| Peak# | Ret. Time | Area    | Height | Conc.   | Unit | Mark | Name |
|-------|-----------|---------|--------|---------|------|------|------|
| 1     | 1.863     | 7738    | 1192   | 0.000   |      |      |      |
| 2     | 2.077     | 212740  | 24733  | 0.000   |      | V    |      |
| 3     | 2.349     | 101314  | 12496  | 0.000   |      | V    |      |
| 4     | 8.670     | 2133850 | 363360 | 0.000   |      |      |      |
| 5     | 9.696     | 2684692 | 453404 | 250.578 | uM   |      | MHET |
| 6     | 10.335    | 14456   | 1093   | -4.523  | uM   |      | BHET |
| 7     | 13.877    | 2906    | 645    | 0.000   |      |      |      |
| 8     | 14.015    | 19463   | 2748   | 0.000   |      | V    |      |
| Total |           | 5177159 | 859670 |         |      |      |      |

## PDA Ch2 240nm

| Peak# | Ret. Time | Area    | Height | Conc.   | Unit | Mark | Name |
|-------|-----------|---------|--------|---------|------|------|------|
| 1     | 2.081     | 491550  | 55616  | 0.000   |      |      |      |
| 2     | 2.346     | 227943  | 28468  | 0.000   |      | V    |      |
| 3     | 8.670     | 2149632 | 366878 | 204.100 | uM   |      | TPA  |
| 4     | 9.696     | 2651310 | 448941 | 0.000   |      |      |      |
| Total |           | 5520435 | 899903 |         |      |      |      |
