# Supplementary material for: A flexible kinetic assay efficiently sorts prospective biocatalysts for PET plastic subunit hydrolysis
Source: Royal Society of Chemistry journal article supplement (doi:10.1039/d2ra00612j), 2022-01-01
Supplement: d2ra00612j1.zip [file E3 37C pH8.pdf › 2021 Beech BHET SI/HPLC PDF Reports/37C pH8/E3 37C pH8.pdf]

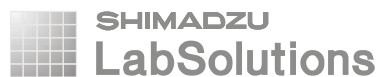

# Analysis Report

## <Sample Information>

Sample Name : E3  
Sample ID :  
Data Filename : E3\_012.lcd  
Method Filename : MHET\_BHET\_rpamide\_060721.lcm  
Batch Filename : BHET\_Colorimetric\_37C\_pH8\_plate1\_RECASC.lcb  
Vial # : 4-25  
Injection Volume : 10 uL  
Date Acquired : 8/24/2021 11:35:50 AM  
Date Processed : 9/3/2021 9:16:09 AM  
Sample Type : Unknown  
Acquired by : System Administrator  
Processed by : System Administrator

## <Chromatogram>

mAU

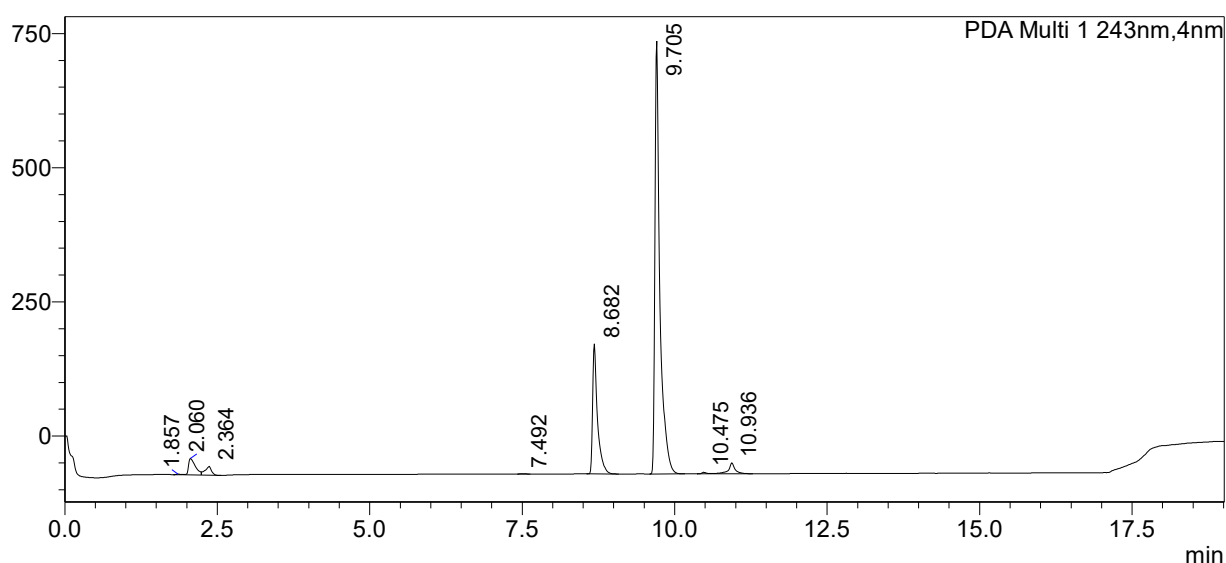

mAU

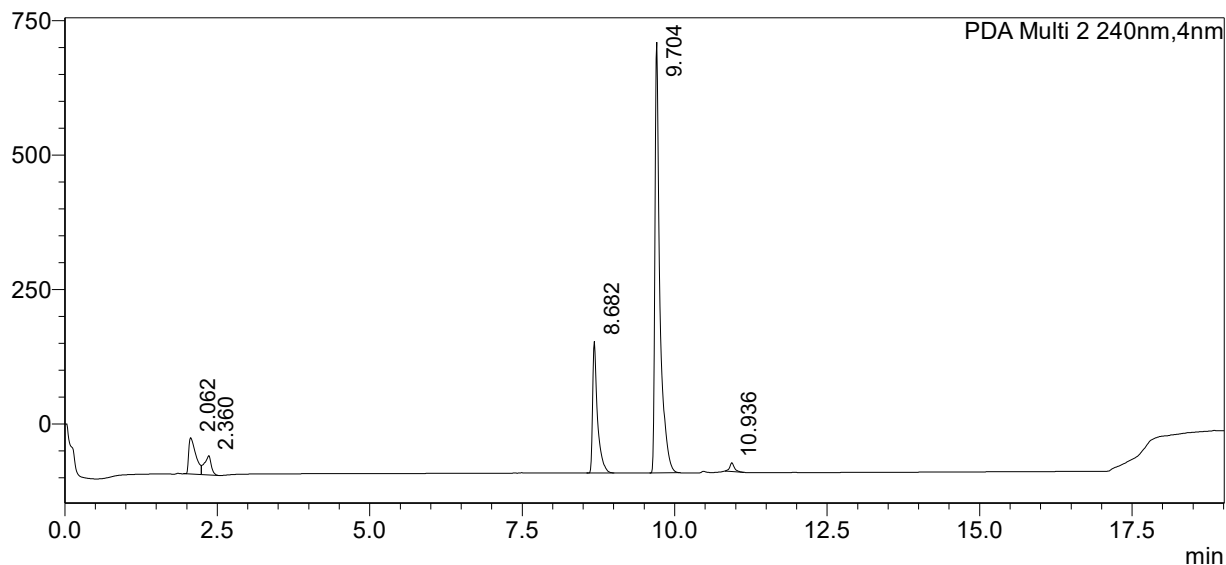

## <Peak Table>

PDA Ch1 243nm

| Peak# | Ret. Time | Area    | Height  | Conc.   | Unit | Mark | Name |
|-------|-----------|---------|---------|---------|------|------|------|
| 1     | 1.857     | 7278    | 1232    | 0.000   |      |      |      |
| 2     | 2.060     | 247648  | 30664   | 0.000   |      | V    |      |
| 3     | 2.364     | 122311  | 16387   | 0.000   |      | V    |      |
| 4     | 7.492     | 2976    | 669     | 0.000   |      |      |      |
| 5     | 8.682     | 1349455 | 242321  | 0.000   |      |      |      |
| 6     | 9.705     | 4605635 | 806494  | 434.672 | uM   |      | MHET |
| 7     | 10.475    | 16063   | 2840    | -1.163  | uM   |      | BHET |
| 8     | 10.936    | 155958  | 20548   | 0.000   |      | V    |      |
| Total |           | 6507325 | 1121155 |         |      |      |      |

## PDA Ch2 240nm

| Peak# | Ret. Time | Area    | Height  | Conc.   | Unit | Mark | Name |
|-------|-----------|---------|---------|---------|------|------|------|
| 1     | 2.062     | 561641  | 67371   | 0.000   |      |      |      |
| 2     | 2.360     | 273512  | 35820   | 0.000   |      | V    |      |
| 3     | 8.682     | 1358359 | 244529  | 124.167 | uM   |      | TPA  |
| 4     | 9.704     | 4561369 | 800775  | 0.000   |      |      |      |
| 5     | 10.936    | 86210   | 16402   | 0.000   |      |      |      |
| Total |           | 6841090 | 1164898 |         |      |      |      |
