# Supplementary material for: A flexible kinetic assay efficiently sorts prospective biocatalysts for PET plastic subunit hydrolysis
Source: Royal Society of Chemistry journal article supplement (doi:10.1039/d2ra00612j), 2022-01-01
Supplement: d2ra00612j1.zip [file E4 37C pH8.pdf › 2021 Beech BHET SI/HPLC PDF Reports/37C pH8/E4 37C pH8.pdf]

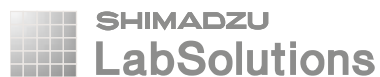

# Analysis Report

## <Sample Information>

|                  |                                        |                                     |
|------------------|----------------------------------------|-------------------------------------|
| Sample Name      | : E4                                   |                                     |
| Sample ID        | :                                      |                                     |
| Data Filename    | : E4_024.lcd                           |                                     |
| Method Filename  | : MHET_BHET_rpamide_060721.lcm         |                                     |
| Batch Filename   | : BHET_Colorimetric_37C_pH8_plate2.lcb |                                     |
| Vial #           | : 4-16                                 | Sample Type : Unknown               |
| Injection Volume | : 10 uL                                |                                     |
| Date Acquired    | : 8/26/2021 3:34:37 PM                 | Acquired by : System Administrator  |
| Date Processed   | : 9/3/2021 8:54:39 AM                  | Processed by : System Administrator |

## <Chromatogram>

mAU

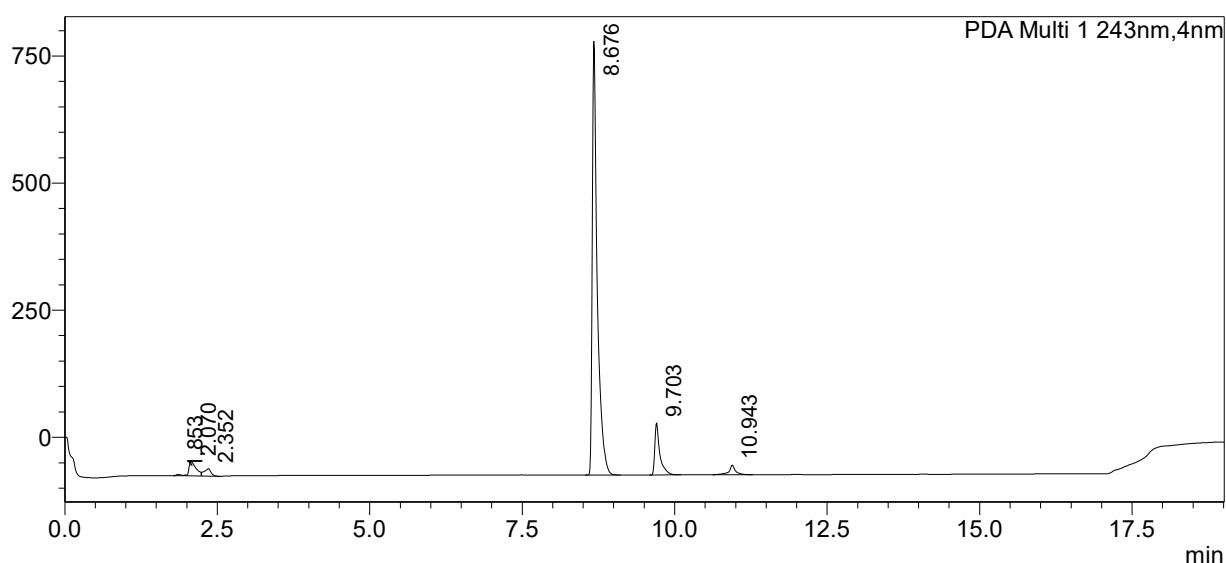

mAU

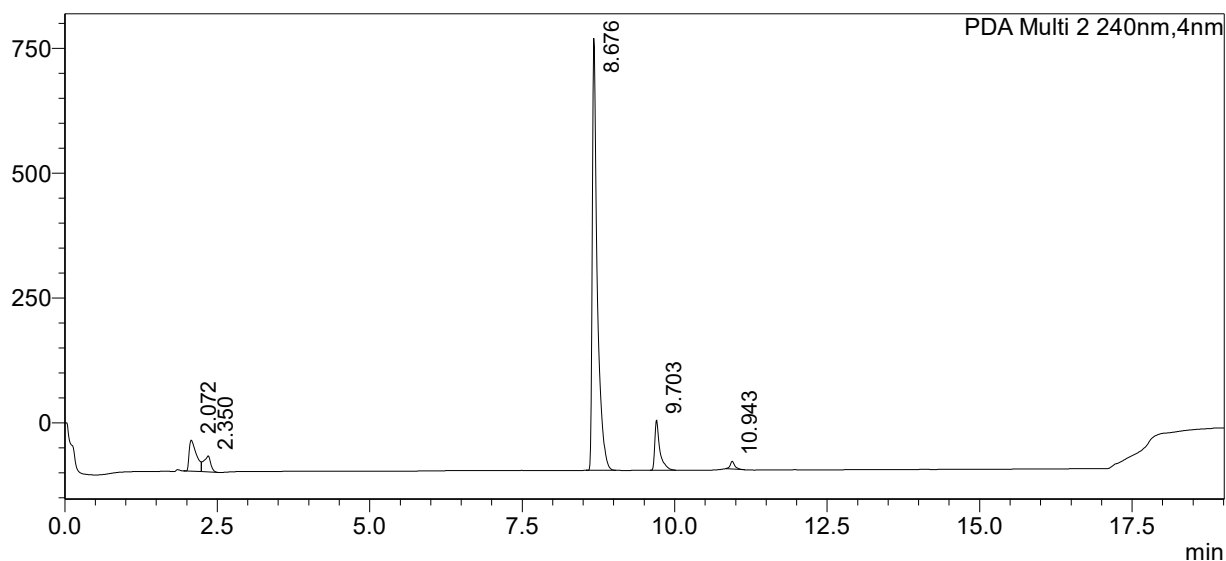

## <Peak Table>

PDA Ch1 243nm

| Peak# | Ret. Time | Area    | Height  | Conc.  | Unit | Mark | Name |
|-------|-----------|---------|---------|--------|------|------|------|
| 1     | 1.853     | 14812   | 2624    | 0.000  |      |      |      |
| 2     | 2.070     | 234530  | 27952   | 0.000  |      | V    |      |
| 3     | 2.352     | 112530  | 14503   | 0.000  |      | V    |      |
| 4     | 8.676     | 4914744 | 853429  | 0.000  |      |      |      |
| 5     | 9.703     | 590330  | 101470  | 51.239 | uM   |      | MHET |
| 6     | 10.943    | 140028  | 19138   | 0.000  |      |      |      |
| Total |           | 6006974 | 1019116 |        |      |      |      |

## PDA Ch2 240nm

| Peak# | Ret. Time | Area    | Height  | Conc.   | Unit | Mark | Name |
|-------|-----------|---------|---------|---------|------|------|------|
| 1     | 2.072     | 528513  | 62125   | 0.000   |      |      |      |
| 2     | 2.350     | 252942  | 32252   | 0.000   |      | V    |      |
| 3     | 8.676     | 4969003 | 865747  | 479.793 | uM   |      | TPA  |
| 4     | 9.703     | 578617  | 100246  | 0.000   |      |      |      |
| 5     | 10.943    | 79934   | 15291   | 0.000   |      |      |      |
| Total |           | 6409010 | 1075660 |         |      |      |      |
