# Supplementary material for: A flexible kinetic assay efficiently sorts prospective biocatalysts for PET plastic subunit hydrolysis
Source: Royal Society of Chemistry journal article supplement (doi:10.1039/d2ra00612j), 2022-01-01
Supplement: d2ra00612j1.zip [file E5 37C pH8.pdf › 2021 Beech BHET SI/HPLC PDF Reports/37C pH8/E5 37C pH8.pdf]

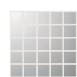SHIMADZU  
LabSolutions

## Analysis Report

## &lt;Sample Information&gt;

|                  |                                               |                                     |
|------------------|-----------------------------------------------|-------------------------------------|
| Sample Name      | : E5                                          |                                     |
| Sample ID        | :                                             |                                     |
| Data Filename    | : E5_024.lcd                                  |                                     |
| Method Filename  | : MHET_BHET_rpamide_060721.lcm                |                                     |
| Batch Filename   | : BHET_Colorimetric_37C_pH8_plate1_RECALC.lcb |                                     |
| Vial #           | : 4-37                                        | Sample Type : Unknown               |
| Injection Volume | : 10 uL                                       |                                     |
| Date Acquired    | : 8/24/2021 2:32:58 PM                        | Acquired by : System Administrator  |
| Date Processed   | : 9/3/2021 9:15:54 AM                         | Processed by : System Administrator |

## &lt;Chromatogram&gt;

mAU

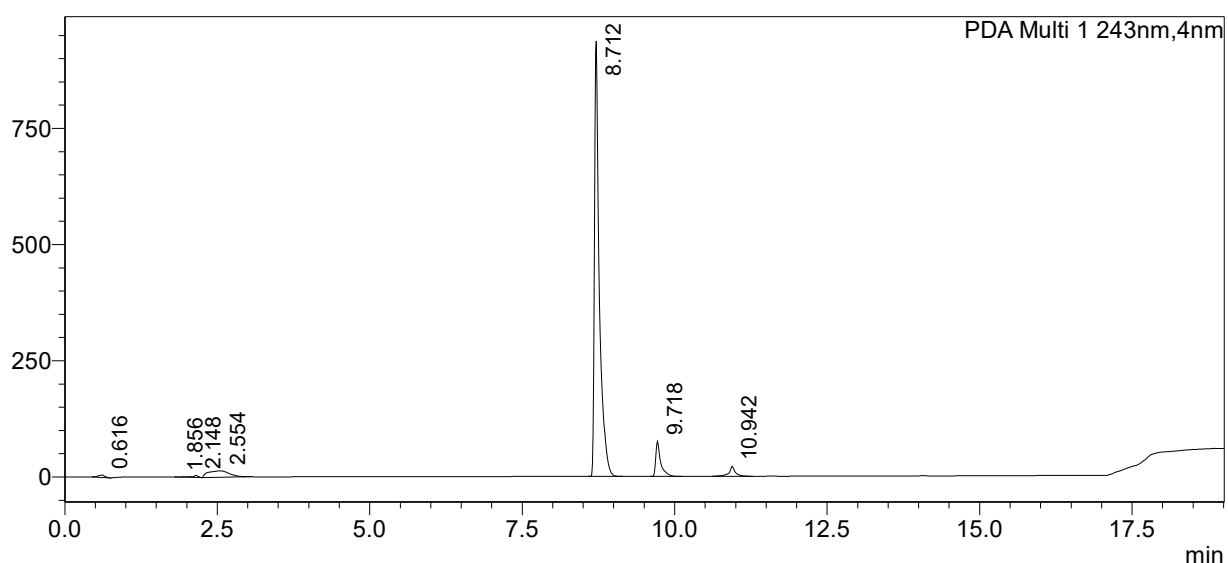

mAU

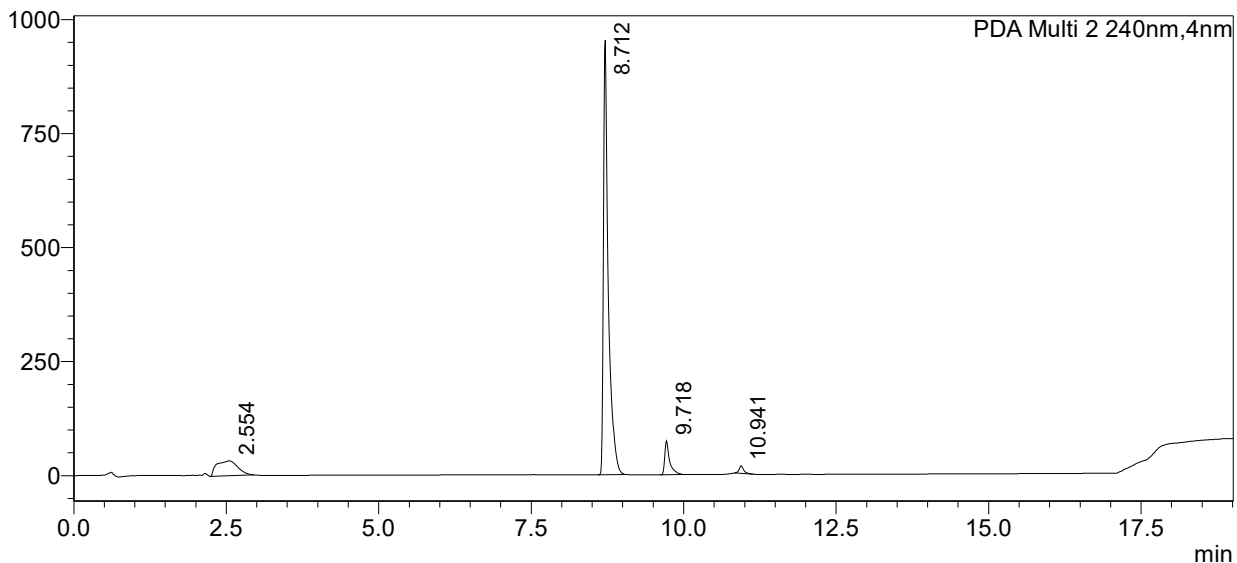

## &lt;Peak Table&gt;

PDA Ch1 243nm

| Peak# | Ret. Time | Area    | Height  | Conc.  | Unit | Mark | Name |
|-------|-----------|---------|---------|--------|------|------|------|
| 1     | 0.616     | 34934   | 5337    | 0.000  |      |      |      |
| 2     | 1.856     | 17134   | 702     | 0.000  |      |      |      |
| 3     | 2.148     | 20185   | 4346    | 0.000  |      | V    |      |
| 4     | 2.554     | 342236  | 14047   | 0.000  |      |      |      |
| 5     | 8.712     | 5245291 | 936619  | 0.000  |      |      |      |
| 6     | 9.718     | 423667  | 75137   | 35.903 | uM   |      | MHET |
| 7     | 10.942    | 152766  | 20898   | 0.000  |      |      |      |
| Total |           | 6236212 | 1057086 |        |      |      |      |

## PDA Ch2 240nm

| Peak# | Ret. Time | Area    | Height  | Conc.   | Unit | Mark | Name |
|-------|-----------|---------|---------|---------|------|------|------|
| 1     | 2.554     | 788772  | 32851   | 0.000   |      |      |      |
| 2     | 8.712     | 5314957 | 952696  | 516.082 | uM   |      | TPA  |
| 3     | 9.718     | 412231  | 74202   | 0.000   |      |      |      |
| 4     | 10.941    | 86096   | 16627   | 0.000   |      |      |      |
| Total |           | 6602055 | 1076376 |         |      |      |      |
