# Supplementary material for: A flexible kinetic assay efficiently sorts prospective biocatalysts for PET plastic subunit hydrolysis
Source: Royal Society of Chemistry journal article supplement (doi:10.1039/d2ra00612j), 2022-01-01
Supplement: d2ra00612j1.zip [file E6 37C pH8.pdf › 2021 Beech BHET SI/HPLC PDF Reports/37C pH8/E6 37C pH8.pdf]

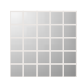SHIMADZU  
LabSolutions

## Analysis Report

## &lt;Sample Information&gt;

|                  |                                        |                                     |
|------------------|----------------------------------------|-------------------------------------|
| Sample Name      | : E6                                   |                                     |
| Sample ID        | :                                      |                                     |
| Data Filename    | : E6_027.lcd                           |                                     |
| Method Filename  | : MHET_BHET_rpamide_060721.lcm         |                                     |
| Batch Filename   | : BHET_Colorimetric_37C_pH8_plate1.lcb |                                     |
| Vial #           | : 4-40                                 | Sample Type : Unknown               |
| Injection Volume | : 10 uL                                |                                     |
| Date Acquired    | : 8/24/2021 3:31:01 PM                 | Acquired by : System Administrator  |
| Date Processed   | : 9/3/2021 9:06:21 AM                  | Processed by : System Administrator |

## &lt;Chromatogram&gt;

mAU

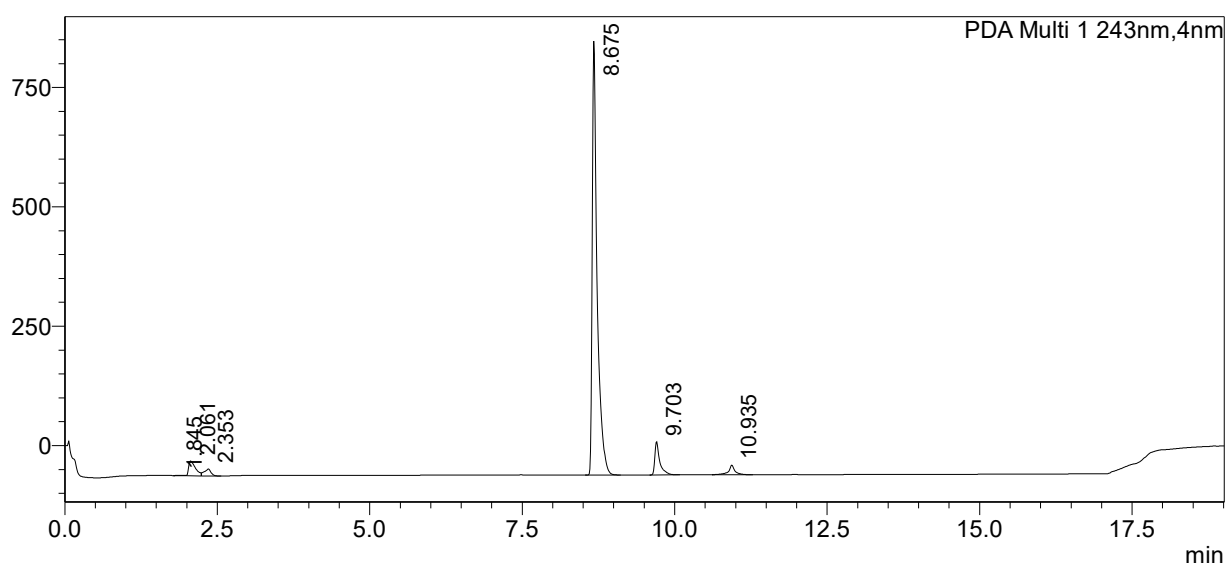

mAU

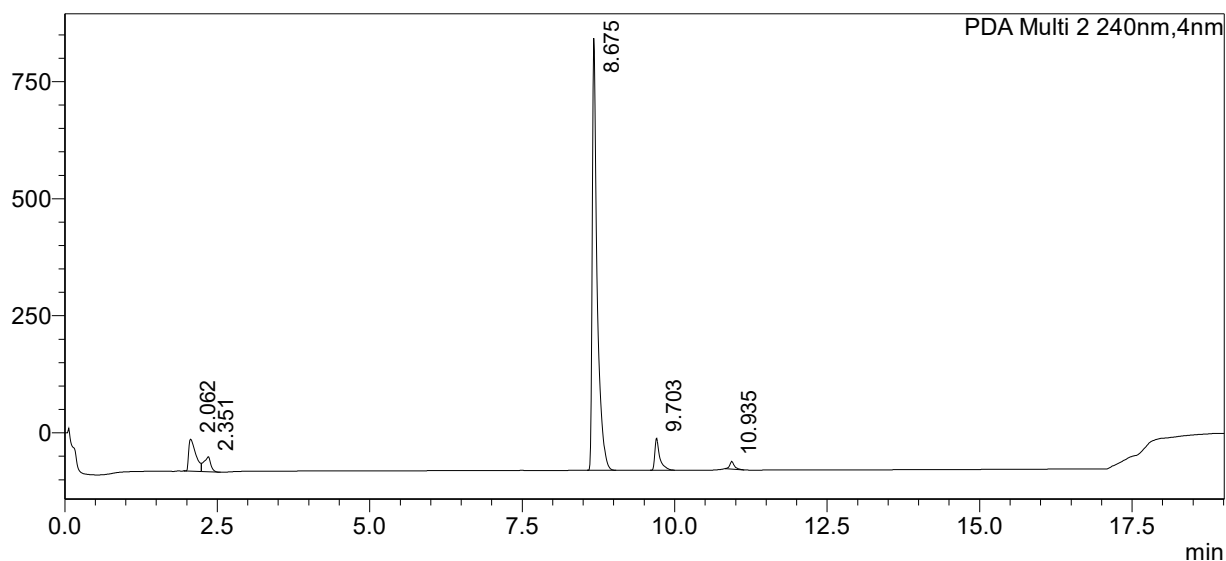

## &lt;Peak Table&gt;

PDA Ch1 243nm

| Peak# | Ret. Time | Area    | Height  | Conc.  | Unit | Mark | Name |
|-------|-----------|---------|---------|--------|------|------|------|
| 1     | 1.845     | 8404    | 698     | 0.000  |      |      |      |
| 2     | 2.061     | 245585  | 30889   | 0.000  |      | V    |      |
| 3     | 2.353     | 111238  | 14704   | 0.000  |      | V    |      |
| 4     | 8.675     | 5134327 | 908478  | 0.000  |      |      |      |
| 5     | 9.703     | 395170  | 69230   | 33.281 | uM   |      | MHET |
| 6     | 10.935    | 147709  | 20191   | 0.000  |      |      |      |
| Total |           | 6042433 | 1044190 |        |      |      |      |

## PDA Ch2 240nm

| Peak# | Ret. Time | Area    | Height  | Conc.   | Unit | Mark | Name |
|-------|-----------|---------|---------|---------|------|------|------|
| 1     | 2.062     | 570643  | 68544   | 0.000   |      |      |      |
| 2     | 2.351     | 250098  | 32288   | 0.000   |      | V    |      |
| 3     | 8.675     | 5195439 | 922665  | 501.977 | uM   |      | TPA  |
| 4     | 9.703     | 385667  | 68375   | 0.000   |      |      |      |
| 5     | 10.935    | 84728   | 16196   | 0.000   |      |      |      |
| Total |           | 6486574 | 1108068 |         |      |      |      |
