# Supplementary material for: A flexible kinetic assay efficiently sorts prospective biocatalysts for PET plastic subunit hydrolysis
Source: Royal Society of Chemistry journal article supplement (doi:10.1039/d2ra00612j), 2022-01-01
Supplement: d2ra00612j1.zip [file E7 37C pH8.pdf › 2021 Beech BHET SI/HPLC PDF Reports/37C pH8/E7 37C pH8.pdf]

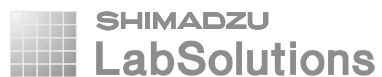

# Analysis Report

## <Sample Information>

Sample Name : E7  
Sample ID :  
Data Filename : E7\_006.lcd  
Method Filename : MHET\_BHET\_rpamide\_060721.lcm  
Batch Filename : BHET\_Colorimetric\_37C\_pH8\_plate1.lcb  
Vial # : 4-48  
Injection Volume : 10 uL  
Date Acquired : 8/24/2021 6:05:58 PM  
Date Processed : 9/3/2021 9:06:35 AM  
Sample Type : Unknown  
Acquired by : System Administrator  
Processed by : System Administrator

## <Chromatogram>

mAU

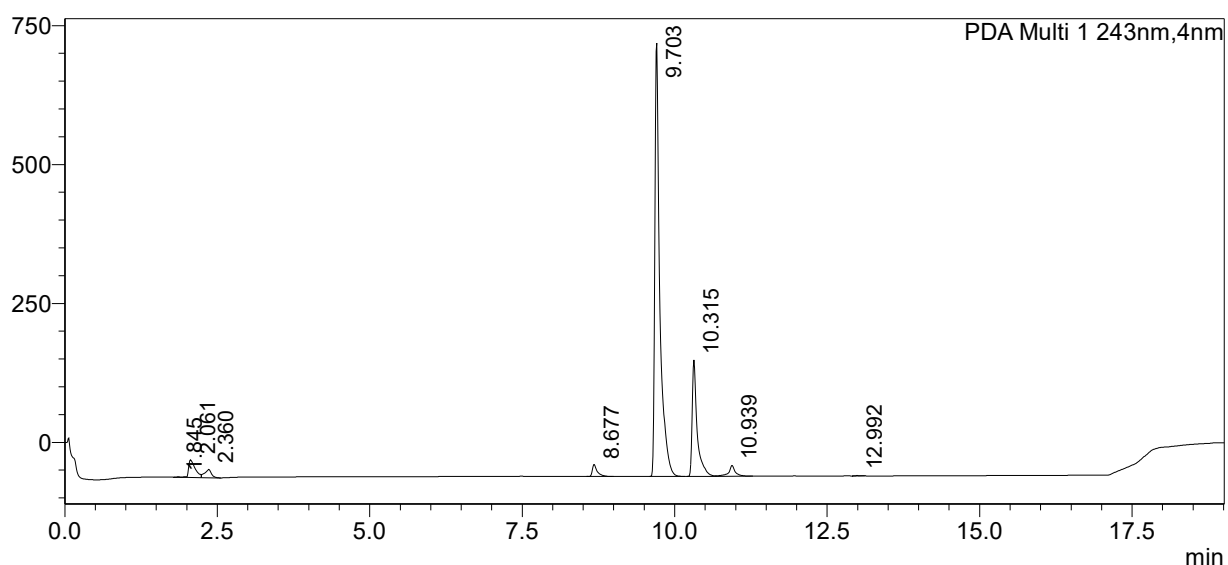

mAU

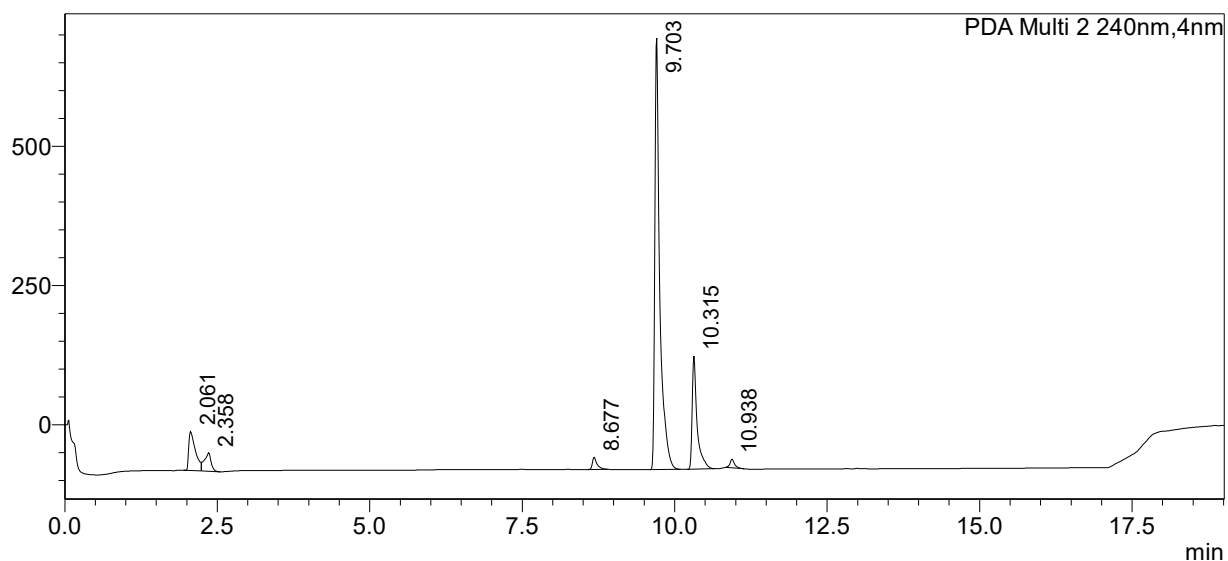

## <Peak Table>

PDA Ch1 243nm

| Peak# | Ret. Time | Area    | Height  | Conc.   | Unit | Mark | Name |
|-------|-----------|---------|---------|---------|------|------|------|
| 1     | 1.845     | 8290    | 686     | 0.000   |      |      |      |
| 2     | 2.061     | 236108  | 31585   | 0.000   |      | V    |      |
| 3     | 2.360     | 110873  | 15066   | 0.000   |      | V    |      |
| 4     | 8.677     | 120180  | 21360   | 0.000   |      |      |      |
| 5     | 9.703     | 4467328 | 779790  | 421.860 | uM   |      | MHET |
| 6     | 10.315    | 1201463 | 209699  | 112.287 | uM   |      | BHET |
| 7     | 10.939    | 148427  | 19492   | 0.000   |      | V    |      |
| 8     | 12.992    | 3249    | 649     | 0.000   |      |      |      |
| Total |           | 6295918 | 1078327 |         |      |      |      |

## PDA Ch2 240nm

| Peak# | Ret. Time | Area    | Height  | Conc. | Unit | Mark | Name |
|-------|-----------|---------|---------|-------|------|------|------|
| 1     | 2.061     | 547036  | 69786   | 0.000 |      |      |      |
| 2     | 2.358     | 249939  | 33265   | 0.000 |      | V    |      |
| 3     | 8.677     | 116230  | 21384   | 7.982 | uM   |      | TPA  |
| 4     | 9.703     | 4424033 | 774038  | 0.000 |      |      |      |
| 5     | 10.315    | 1150471 | 203219  | 0.000 |      |      |      |
| 6     | 10.938    | 80593   | 15328   | 0.000 |      |      |      |
| Total |           | 6568302 | 1117021 |       |      |      |      |
