# Supplementary material for: A flexible kinetic assay efficiently sorts prospective biocatalysts for PET plastic subunit hydrolysis
Source: Royal Society of Chemistry journal article supplement (doi:10.1039/d2ra00612j), 2022-01-01
Supplement: d2ra00612j1.zip [file E8 37C pH8.pdf › 2021 Beech BHET SI/HPLC PDF Reports/37C pH8/E8 37C pH8.pdf]

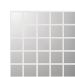SHIMADZU  
LabSolutions

## Analysis Report

## &lt;Sample Information&gt;

|                  |                                        |                                     |
|------------------|----------------------------------------|-------------------------------------|
| Sample Name      | : E8                                   |                                     |
| Sample ID        | :                                      |                                     |
| Data Filename    | : E8_009.lcd                           |                                     |
| Method Filename  | : MHET_BHET_rpamide_060721.lcm         |                                     |
| Batch Filename   | : BHET_Colorimetric_37C_pH8_plate1.lcb |                                     |
| Vial #           | : 4-51                                 | Sample Type : Unknown               |
| Injection Volume | : 10 uL                                |                                     |
| Date Acquired    | : 8/24/2021 7:04:03 PM                 | Acquired by : System Administrator  |
| Date Processed   | : 9/3/2021 9:06:41 AM                  | Processed by : System Administrator |

## &lt;Chromatogram&gt;

mAU

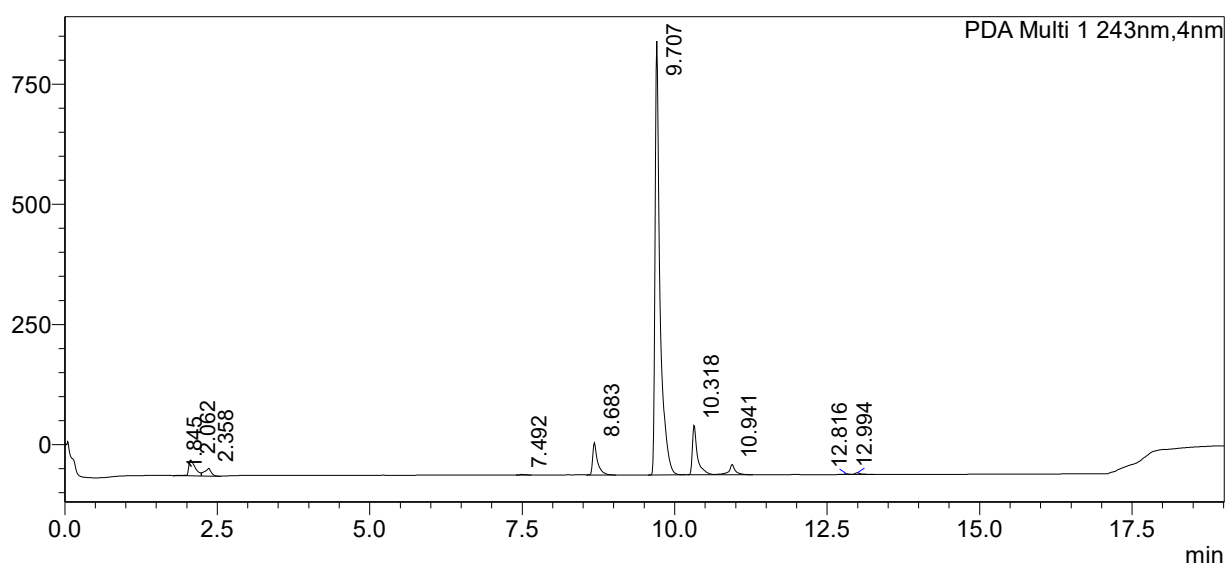

mAU

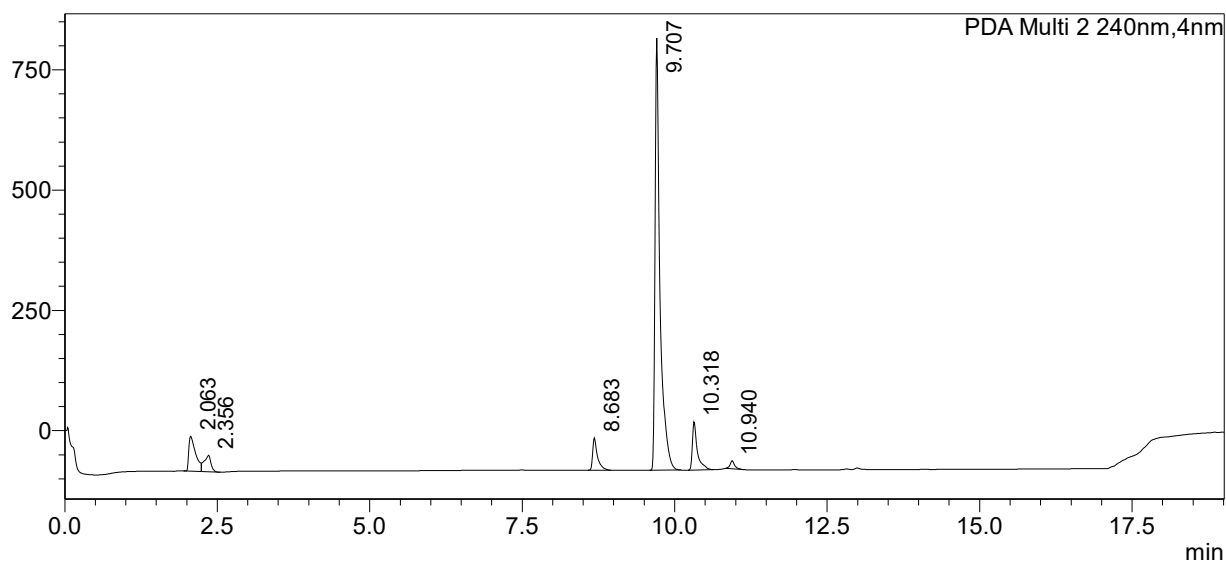

## &lt;Peak Table&gt;

PDA Ch1 243nm

| Peak# | Ret. Time | Area    | Height  | Conc.   | Unit | Mark | Name |
|-------|-----------|---------|---------|---------|------|------|------|
| 1     | 1.845     | 9392    | 826     | 0.000   |      |      |      |
| 2     | 2.062     | 248453  | 32755   | 0.000   |      | V    |      |
| 3     | 2.358     | 117583  | 15741   | 0.000   |      | V    |      |
| 4     | 7.492     | 4533    | 964     | 0.000   |      |      |      |
| 5     | 8.683     | 370485  | 66867   | 0.000   |      |      |      |
| 6     | 9.707     | 5131915 | 903134  | 483.422 | uM   |      | MHET |
| 7     | 10.318    | 600295  | 102984  | 54.752  | uM   |      | BHET |
| 8     | 10.941    | 158757  | 21086   | 0.000   |      | V    |      |
| 9     | 12.816    | 8357    | 1416    | 0.000   |      |      |      |
| 10    | 12.994    | 23268   | 3468    | 0.000   |      | V    |      |
| Total |           | 6673038 | 1149241 |         |      |      |      |

## PDA Ch2 240nm

| Peak# | Ret. Time | Area    | Height  | Conc.  | Unit | Mark | Name |
|-------|-----------|---------|---------|--------|------|------|------|
| 1     | 2.063     | 575354  | 72405   | 0.000  |      |      |      |
| 2     | 2.356     | 265290  | 34701   | 0.000  |      | V    |      |
| 3     | 8.683     | 369172  | 67336   | 31.641 | uM   |      | TPA  |
| 4     | 9.707     | 5086891 | 897801  | 0.000  |      |      |      |
| 5     | 10.318    | 569472  | 99684   | 0.000  |      |      |      |
| 6     | 10.940    | 86524   | 16632   | 0.000  |      |      |      |
| Total |           | 6952703 | 1188558 |        |      |      |      |
