# Supplementary material for: A flexible kinetic assay efficiently sorts prospective biocatalysts for PET plastic subunit hydrolysis
Source: Royal Society of Chemistry journal article supplement (doi:10.1039/d2ra00612j), 2022-01-01
Supplement: d2ra00612j1.zip [file E9 37C pH8.pdf › 2021 Beech BHET SI/HPLC PDF Reports/37C pH8/E9 37C pH8.pdf]

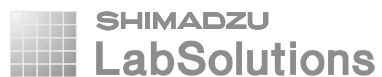

# Analysis Report

## <Sample Information>

|                  |                                        |                                     |
|------------------|----------------------------------------|-------------------------------------|
| Sample Name      | :E9                                    |                                     |
| Sample ID        | :                                      |                                     |
| Data Filename    | : E9_009.lcd                           |                                     |
| Method Filename  | : MHET_BHET_rpamide_060721.lcm         |                                     |
| Batch Filename   | : BHET_Colorimetric_37C_pH8_plate1.lcb |                                     |
| Vial #           | : 3-3                                  | Sample Type : Unknown               |
| Injection Volume | : 10 uL                                |                                     |
| Date Acquired    | : 8/24/2021 9:37:21 PM                 | Acquired by : System Administrator  |
| Date Processed   | : 9/3/2021 9:06:52 AM                  | Processed by : System Administrator |

## <Chromatogram>

mAU

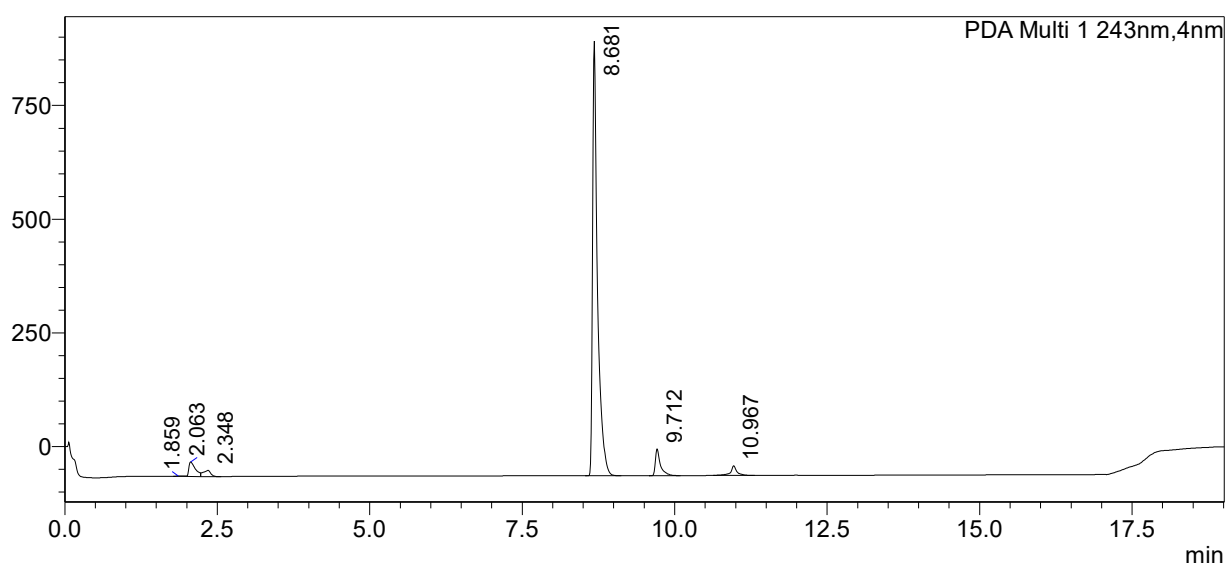

mAU

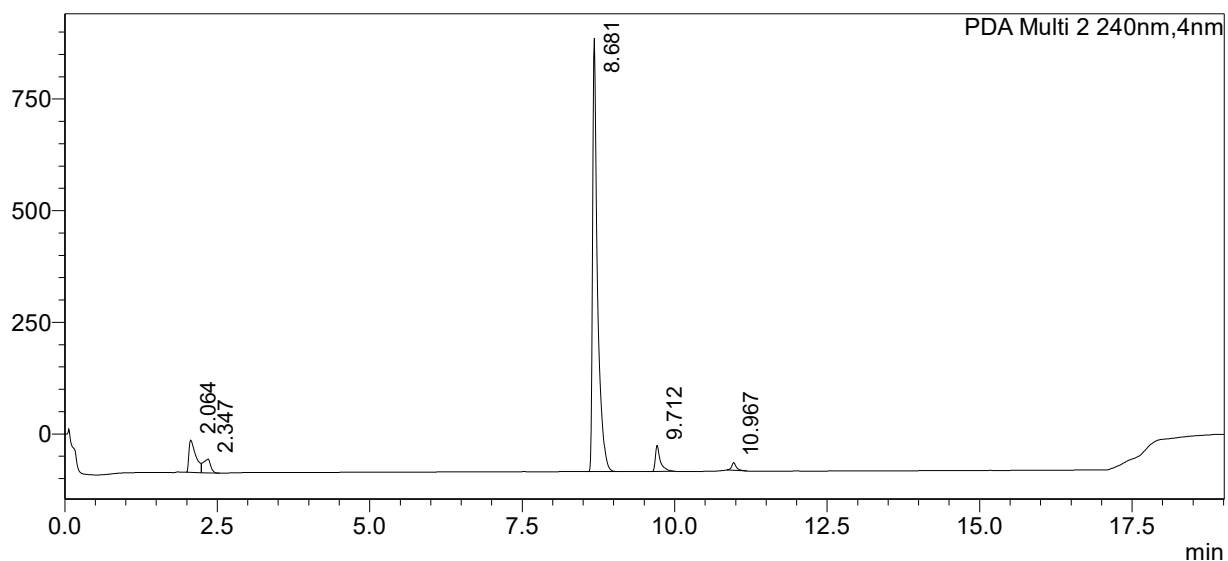

## <Peak Table>

PDA Ch1 243nm

| Peak# | Ret. Time | Area    | Height  | Conc.  | Unit | Mark | Name |
|-------|-----------|---------|---------|--------|------|------|------|
| 1     | 1.859     | 6515    | 1130    | 0.000  |      |      |      |
| 2     | 2.063     | 249117  | 32264   | 0.000  |      | V    |      |
| 3     | 2.348     | 117235  | 13781   | 0.000  |      | V    |      |
| 4     | 8.681     | 5415011 | 955628  | 0.000  |      |      |      |
| 5     | 9.712     | 339927  | 58624   | 28.197 | uM   |      | MHET |
| 6     | 10.967    | 152946  | 21542   | 0.000  |      |      |      |
| Total |           | 6280751 | 1082968 |        |      |      |      |

## PDA Ch2 240nm

| Peak# | Ret. Time | Area    | Height  | Conc.   | Unit | Mark | Name |
|-------|-----------|---------|---------|---------|------|------|------|
| 1     | 2.064     | 585386  | 71889   | 0.000   |      |      |      |
| 2     | 2.347     | 254146  | 31111   | 0.000   |      | V    |      |
| 3     | 8.681     | 5480464 | 970557  | 535.613 | uM   |      | TPA  |
| 4     | 9.712     | 330027  | 57840   | 0.000   |      |      |      |
| 5     | 10.967    | 90199   | 17465   | 0.000   |      |      |      |
| Total |           | 6740222 | 1148863 |         |      |      |      |
