# Supplementary material for: A flexible kinetic assay efficiently sorts prospective biocatalysts for PET plastic subunit hydrolysis
Source: Royal Society of Chemistry journal article supplement (doi:10.1039/d2ra00612j), 2022-01-01
Supplement: d2ra00612j1.zip [file E10 37C pH8.pdf › 2021 Beech BHET SI/HPLC PDF Reports/37C pH8/E10 37C pH8.pdf]

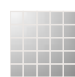SHIMADZU  
LabSolutions

## Analysis Report

## &lt;Sample Information&gt;

|                  |                                        |                                     |
|------------------|----------------------------------------|-------------------------------------|
| Sample Name      | E10                                    |                                     |
| Sample ID        | :                                      |                                     |
| Data Filename    | : E10_015.lcd                          |                                     |
| Method Filename  | : MHET_BHET_rpamide_060721.lcm         |                                     |
| Batch Filename   | : BHET_Colorimetric_37C_pH8_plate1.lcb |                                     |
| Vial #           | : 3-9                                  | Sample Type : Unknown               |
| Injection Volume | : 10 uL                                |                                     |
| Date Acquired    | : 8/24/2021 11:33:24 PM                | Acquired by : System Administrator  |
| Date Processed   | : 9/3/2021 9:07:02 AM                  | Processed by : System Administrator |

## &lt;Chromatogram&gt;

mAU

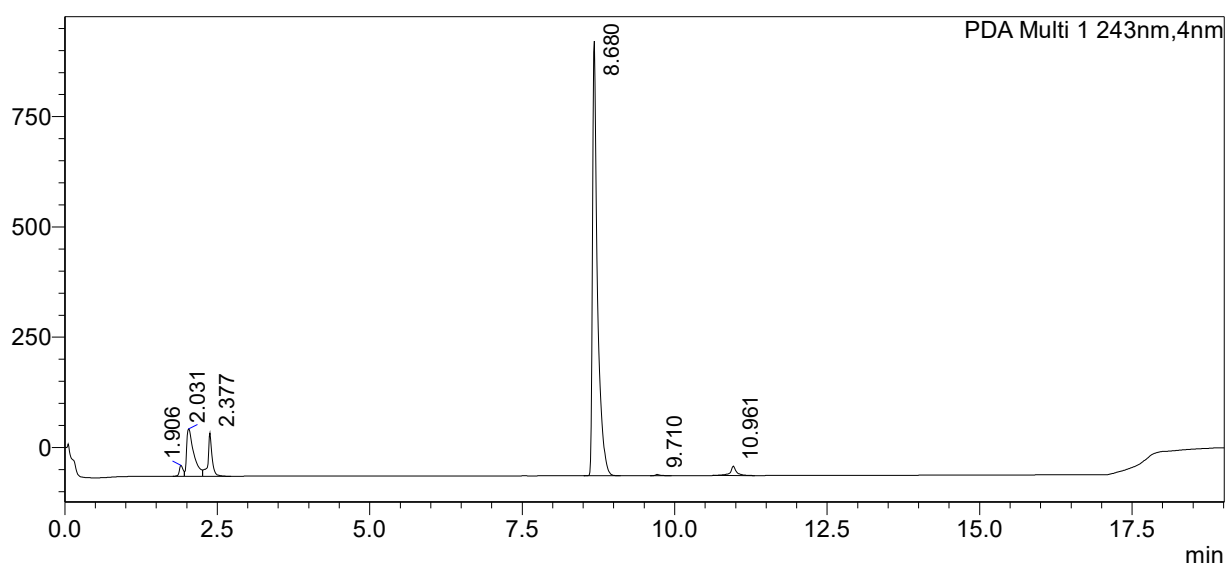

mAU

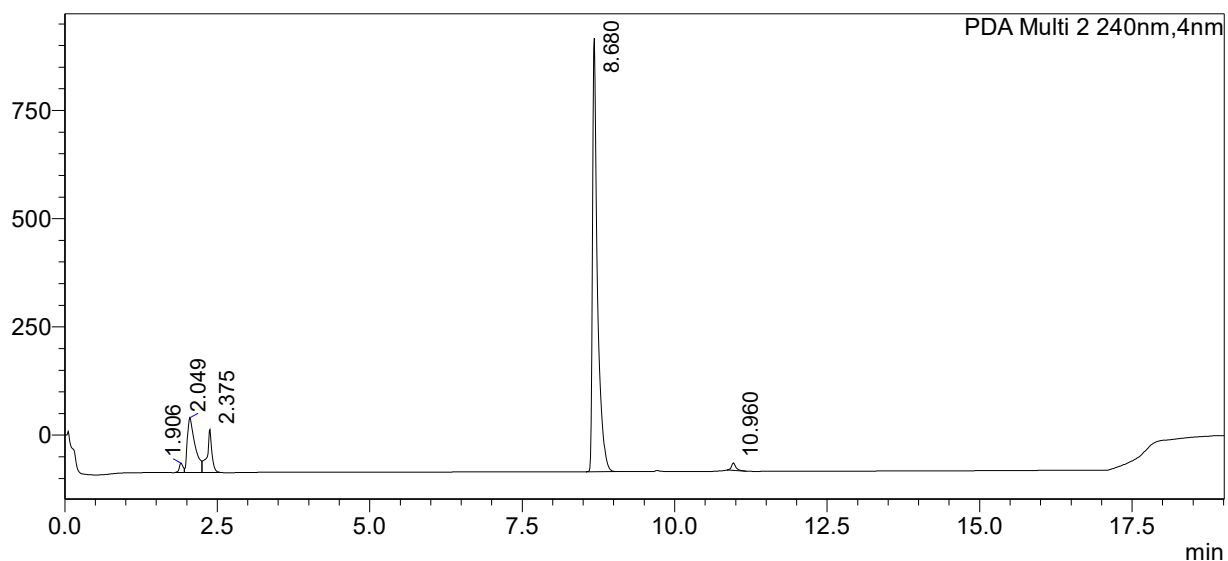

## &lt;Peak Table&gt;

PDA Ch1 243nm

| Peak# | Ret. Time | Area    | Height  | Conc.  | Unit | Mark | Name |
|-------|-----------|---------|---------|--------|------|------|------|
| 1     | 1.906     | 111829  | 25111   | 0.000  |      |      |      |
| 2     | 2.031     | 900993  | 107641  | 0.000  |      | V    |      |
| 3     | 2.377     | 464664  | 98229   | 0.000  |      | V    |      |
| 4     | 8.680     | 5623676 | 985323  | 0.000  |      |      |      |
| 5     | 9.710     | 15164   | 2665    | -1.687 | uM   |      | MHET |
| 6     | 10.961    | 151676  | 21082   | 0.000  |      |      |      |
| Total |           | 7268002 | 1240052 |        |      |      |      |

## PDA Ch2 240nm

| Peak# | Ret. Time | Area    | Height  | Conc.   | Unit | Mark | Name |
|-------|-----------|---------|---------|---------|------|------|------|
| 1     | 1.906     | 97256   | 21757   | 0.000   |      |      |      |
| 2     | 2.049     | 1135302 | 126147  | 0.000   |      | V    |      |
| 3     | 2.375     | 547999  | 98906   | 0.000   |      | V    |      |
| 4     | 8.680     | 5694606 | 1001225 | 560.884 | uM   |      | TPA  |
| 5     | 10.960    | 87036   | 16874   | 0.000   |      |      |      |
| Total |           | 7562198 | 1264909 |         |      |      |      |
