# Supplementary material for: A flexible kinetic assay efficiently sorts prospective biocatalysts for PET plastic subunit hydrolysis
Source: Royal Society of Chemistry journal article supplement (doi:10.1039/d2ra00612j), 2022-01-01
Supplement: d2ra00612j1.zip [file E10 50C pH8.pdf › 2021 Beech BHET SI/HPLC PDF Reports/50C pH8/E10 50C pH8.pdf]

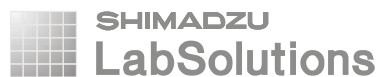

# Analysis Report

## <Sample Information>

Sample Name : E10 50C  
Sample ID :  
Data Filename : E10 50C\_023.lcd  
Method Filename : MHET\_BHET\_rpamide\_060721.lcm  
Batch Filename : BHET\_Colorimetric\_50C\_pH8\_plate1.lcb  
Vial # : 4-13  
Injection Volume : 10 uL  
Date Acquired : 8/30/2021 7:40:40 PM  
Date Processed : 9/3/2021 8:52:06 AM  
Sample Type : Unknown  
Acquired by : System Administrator  
Processed by : System Administrator

## <Chromatogram>

mAU

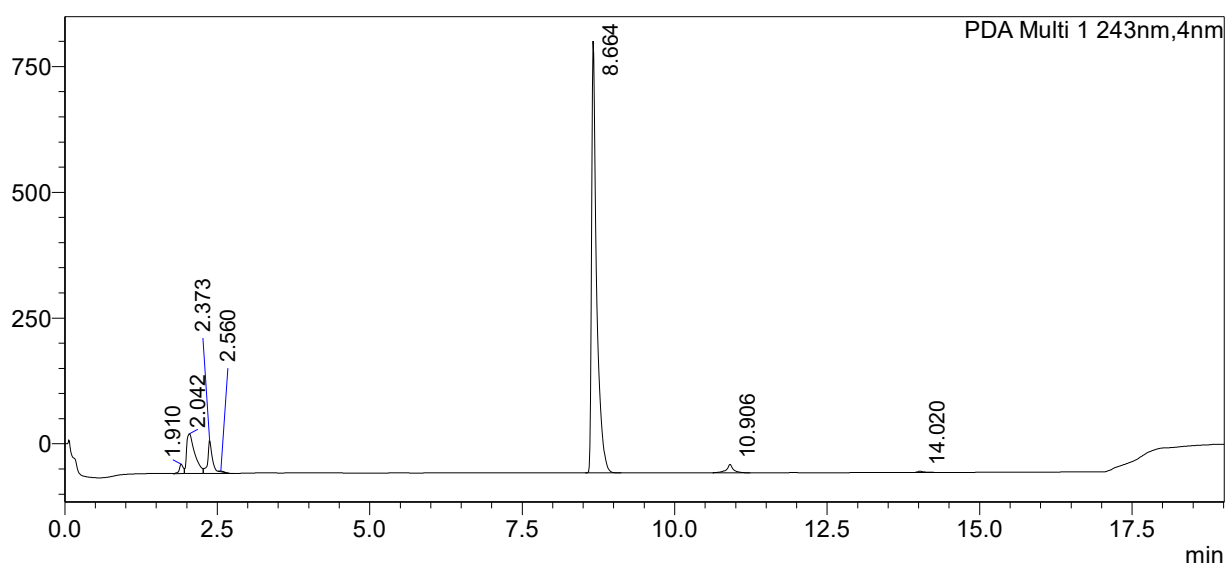

mAU

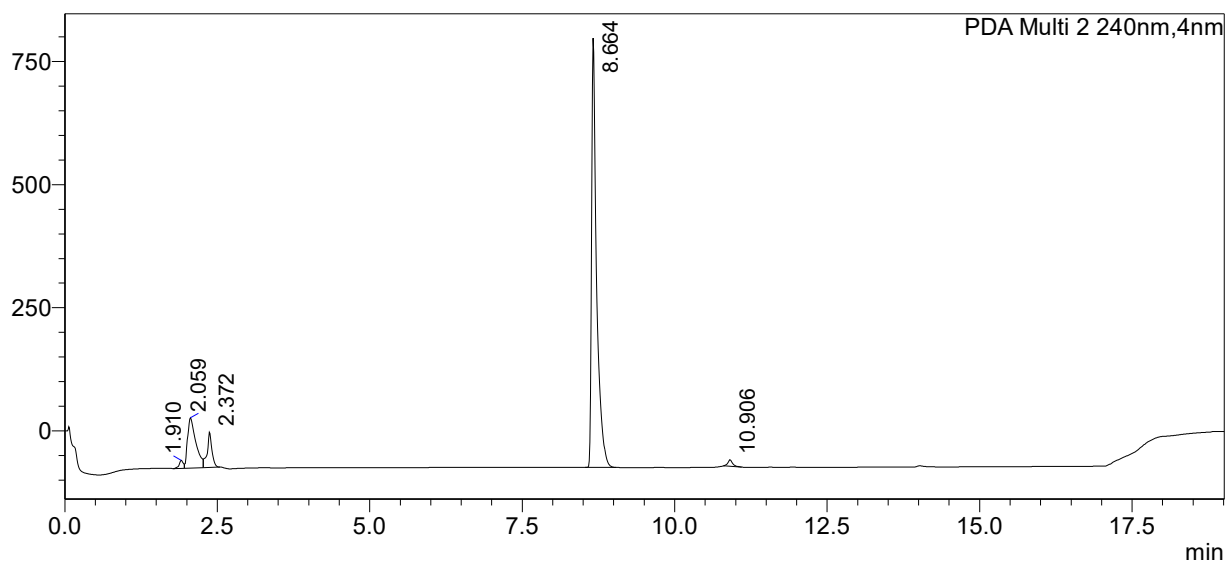

## <Peak Table>

PDA Ch1 243nm

| Peak# | Ret. Time | Area    | Height  | Conc. | Unit | Mark | Name |
|-------|-----------|---------|---------|-------|------|------|------|
| 1     | 1.910     | 86983   | 18624   | 0.000 |      |      |      |
| 2     | 2.042     | 747310  | 79044   | 0.000 |      | V    |      |
| 3     | 2.373     | 372008  | 65150   | 0.000 |      | SV   |      |
| 4     | 2.560     | 6628    | 1544    | 0.000 |      | T    |      |
| 5     | 8.664     | 4973833 | 858277  | 0.000 |      |      |      |
| 6     | 10.906    | 126332  | 16601   | 0.000 |      |      |      |
| 7     | 14.020    | 19113   | 2455    | 0.000 |      |      |      |
| Total |           | 6332207 | 1041695 |       |      |      |      |

## PDA Ch2 240nm

| Peak# | Ret. Time | Area    | Height  | Conc.   | Unit | Mark | Name |
|-------|-----------|---------|---------|---------|------|------|------|
| 1     | 1.910     | 79848   | 16357   | 0.000   |      |      |      |
| 2     | 2.059     | 977905  | 102118  | 0.000   |      | V    |      |
| 3     | 2.372     | 385443  | 71554   | 0.000   |      | V    |      |
| 4     | 8.664     | 5031486 | 871142  | 485.814 | uM   |      | TPA  |
| 5     | 10.906    | 68566   | 12919   | 0.000   |      |      |      |
| Total |           | 6543249 | 1074090 |         |      |      |      |
