# Supplementary material for: A flexible kinetic assay efficiently sorts prospective biocatalysts for PET plastic subunit hydrolysis
Source: Royal Society of Chemistry journal article supplement (doi:10.1039/d2ra00612j), 2022-01-01
Supplement: d2ra00612j1.zip [file E10 pH 7 37C.pdf › 2021 Beech BHET SI/HPLC PDF Reports/37C pH7/E10 pH 7 37C.pdf]

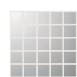**SHIMADZU**  
**LabSolutions**

# Analysis Report

## <Sample Information>

|                  |                                          |              |                        |
|------------------|------------------------------------------|--------------|------------------------|
| Sample Name      | : E10 pH 7                               |              |                        |
| Sample ID        | :                                        |              |                        |
| Data Filename    | : E10 pH 7_043.lcd                       |              |                        |
| Method Filename  | : MHET_BHET_rpamide_060721.lcm           |              |                        |
| Batch Filename   | : BHET_Colorimetric_37C_pH7_09072021.lcb |              |                        |
| Vial #           | : 3-27                                   | Sample Type  | : Unknown              |
| Injection Volume | : 10 uL                                  |              |                        |
| Date Acquired    | : 9/8/2021 3:06:52 AM                    | Acquired by  | : System Administrator |
| Date Processed   | : 9/8/2021 10:30:41 AM                   | Processed by | : System Administrator |

## <Chromatogram>

mAU

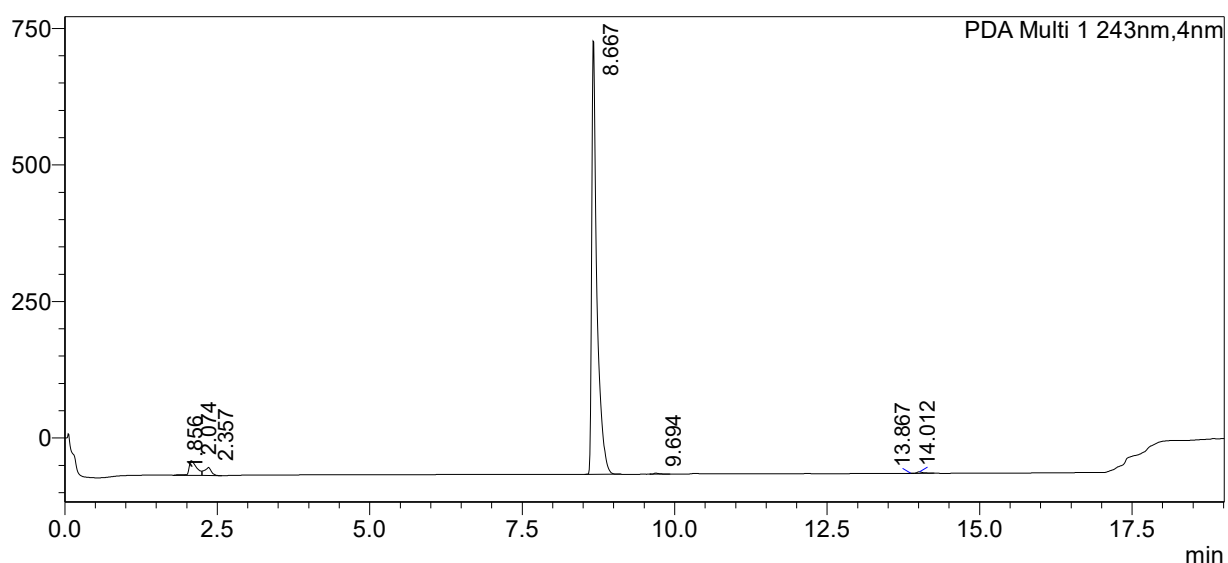

mAU

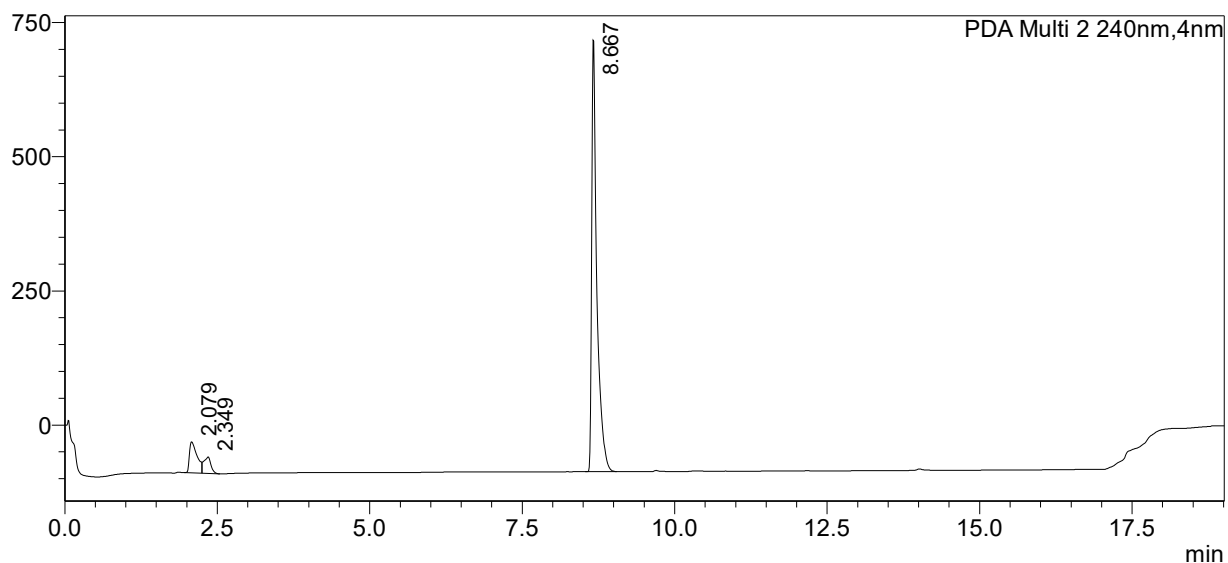

## <Peak Table>

PDA Ch1 243nm

| Peak# | Ret. Time | Area    | Height | Conc.  | Unit | Mark | Name |
|-------|-----------|---------|--------|--------|------|------|------|
| 1     | 1.856     | 9504    | 1196   | 0.000  |      |      |      |
| 2     | 2.074     | 233156  | 26757  | 0.000  |      | V    |      |
| 3     | 2.357     | 111893  | 14673  | 0.000  |      | V    |      |
| 4     | 8.667     | 4739134 | 793137 | 0.000  |      |      |      |
| 5     | 9.694     | 12223   | 2137   | -4.493 | uM   |      | MHET |
| 6     | 13.867    | 3074    | 614    | 0.000  |      |      |      |
| 7     | 14.012    | 19089   | 2725   | 0.000  |      | V    |      |
| Total |           | 5128073 | 841240 |        |      |      |      |

## PDA Ch2 240nm

| Peak# | Ret. Time | Area    | Height | Conc.   | Unit | Mark | Name |
|-------|-----------|---------|--------|---------|------|------|------|
| 1     | 2.079     | 519709  | 57805  | 0.000   |      |      |      |
| 2     | 2.349     | 242945  | 30939  | 0.000   |      | V    |      |
| 3     | 8.667     | 4789150 | 804054 | 475.899 | uM   |      | TPA  |
| Total |           | 5551804 | 892798 |         |      |      |      |
