# Supplementary material for: A flexible kinetic assay efficiently sorts prospective biocatalysts for PET plastic subunit hydrolysis
Source: Royal Society of Chemistry journal article supplement (doi:10.1039/d2ra00612j), 2022-01-01
Supplement: d2ra00612j1.zip [file E11 37C pH8.pdf › 2021 Beech BHET SI/HPLC PDF Reports/37C pH8/E11 37C pH8.pdf]

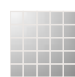SHIMADZU  
LabSolutions

# Analysis Report

## <Sample Information>

|                  |                                        |                                     |
|------------------|----------------------------------------|-------------------------------------|
| Sample Name      | : Bacillus subtilis Plate 1            |                                     |
| Sample ID        | :                                      |                                     |
| Data Filename    | : Bacillus subtilis Plate 1_017.lcd    |                                     |
| Method Filename  | : MHET_BHET_rpamide_060721.lcm         |                                     |
| Batch Filename   | : BHET_Colorimetric_37C_pH8_plate1.lcb |                                     |
| Vial #           | : 3-11                                 | Sample Type : Unknown               |
| Injection Volume | : 10 uL                                |                                     |
| Date Acquired    | : 8/25/2021 12:12:05 AM                | Acquired by : System Administrator  |
| Date Processed   | : 9/3/2021 9:07:06 AM                  | Processed by : System Administrator |

## <Chromatogram>

mAU

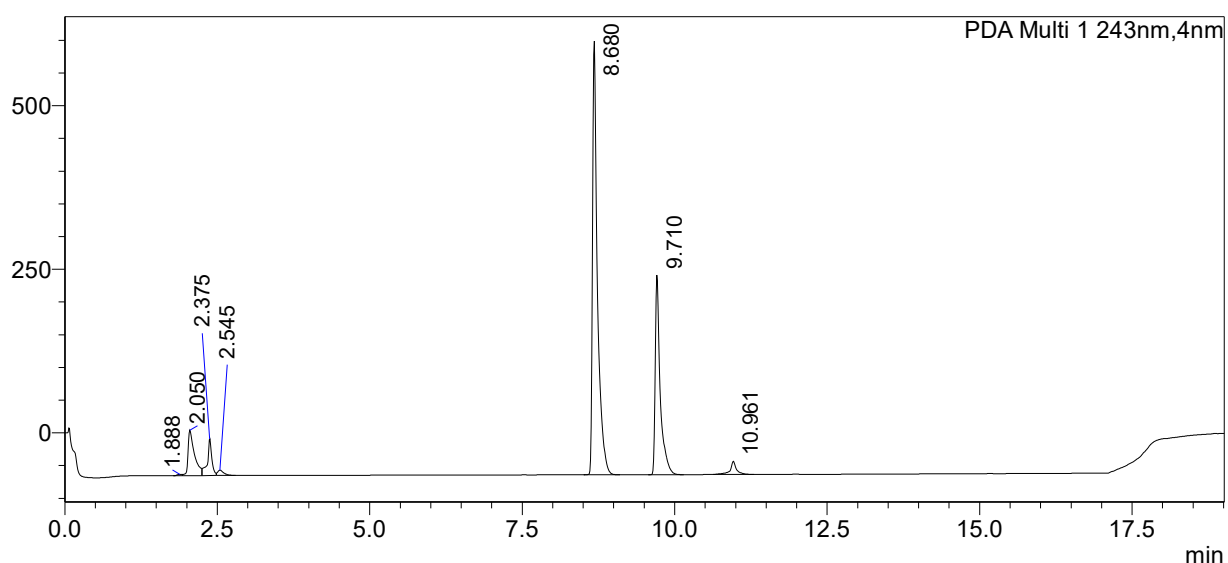

mAU

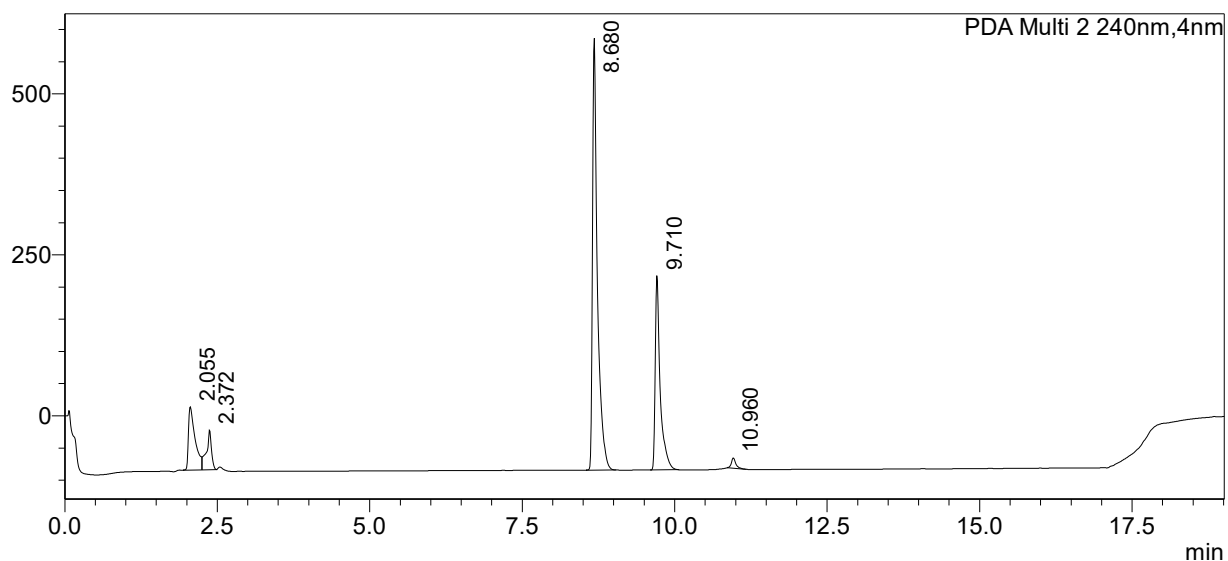

## <Peak Table>

PDA Ch1 243nm

| Peak# | Ret. Time | Area    | Height  | Conc.   | Unit | Mark | Name |
|-------|-----------|---------|---------|---------|------|------|------|
| 1     | 1.888     | 11997   | 2071    | 0.000   |      |      |      |
| 2     | 2.050     | 517541  | 69300   | 0.000   |      | V    |      |
| 3     | 2.375     | 282842  | 56017   | 0.000   |      | V    |      |
| 4     | 2.545     | 54869   | 8132    | 0.000   |      | V    |      |
| 5     | 8.680     | 3761649 | 662883  | 0.000   |      |      |      |
| 6     | 9.710     | 1748690 | 305326  | 161.551 | uM   |      | MHET |
| 7     | 10.961    | 142008  | 19866   | 0.000   |      |      |      |
| Total |           | 6519594 | 1123594 |         |      |      |      |

## PDA Ch2 240nm

| Peak# | Ret. Time | Area    | Height  | Conc.   | Unit | Mark | Name |
|-------|-----------|---------|---------|---------|------|------|------|
| 1     | 2.055     | 769822  | 98392   | 0.000   |      |      |      |
| 2     | 2.372     | 350030  | 61465   | 0.000   |      | V    |      |
| 3     | 8.680     | 3798618 | 670839  | 367.001 | uM   |      | TPA  |
| 4     | 9.710     | 1725703 | 302101  | 0.000   |      |      |      |
| 5     | 10.960    | 82111   | 15927   | 0.000   |      |      |      |
| Total |           | 6726283 | 1148724 |         |      |      |      |
