# Supplementary material for: A flexible kinetic assay efficiently sorts prospective biocatalysts for PET plastic subunit hydrolysis
Source: Royal Society of Chemistry journal article supplement (doi:10.1039/d2ra00612j), 2022-01-01
Supplement: d2ra00612j1.zip [file E11 50C pH8.pdf › 2021 Beech BHET SI/HPLC PDF Reports/50C pH8/E11 50C pH8.pdf]

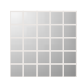SHIMADZU  
LabSolutions

## Analysis Report

## &lt;Sample Information&gt;

|                  |                                        |                                     |
|------------------|----------------------------------------|-------------------------------------|
| Sample Name      | : E11 50C                              |                                     |
| Sample ID        | :                                      |                                     |
| Data Filename    | : E11 50C_026.lcd                      |                                     |
| Method Filename  | : MHET_BHET_rpamide_060721.lcm         |                                     |
| Batch Filename   | : BHET_Colorimetric_50C_pH8_plate1.lcb |                                     |
| Vial #           | : 4-16                                 | Sample Type : Unknown               |
| Injection Volume | : 10 uL                                |                                     |
| Date Acquired    | : 8/30/2021 8:38:47 PM                 | Acquired by : System Administrator  |
| Date Processed   | : 9/3/2021 8:52:12 AM                  | Processed by : System Administrator |

## &lt;Chromatogram&gt;

mAU

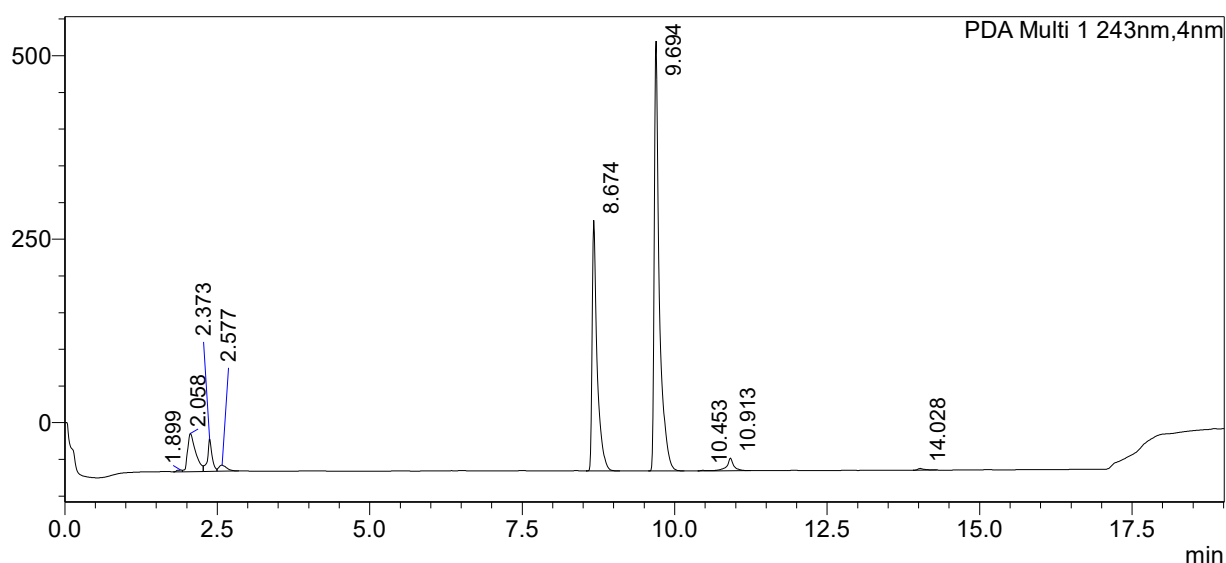

mAU

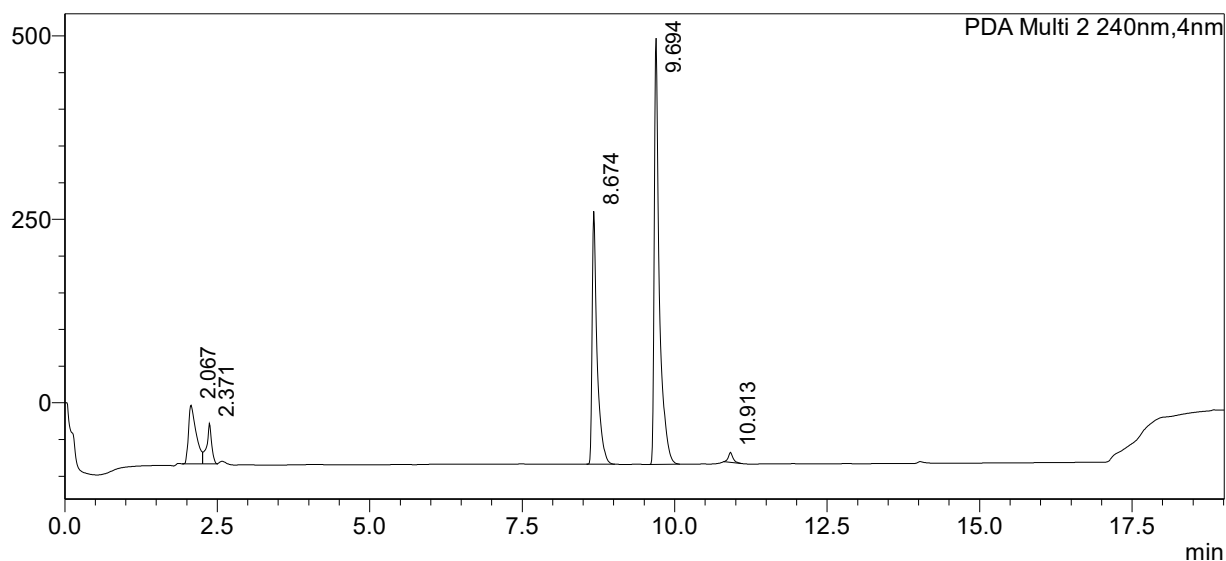

## &lt;Peak Table&gt;

PDA Ch1 243nm

| Peak# | Ret. Time | Area    | Height  | Conc.   | Unit | Mark | Name |
|-------|-----------|---------|---------|---------|------|------|------|
| 1     | 1.899     | 15404   | 2411    | 0.000   |      |      |      |
| 2     | 2.058     | 487021  | 52238   | 0.000   |      | V    |      |
| 3     | 2.373     | 228065  | 43721   | 0.000   |      | V    |      |
| 4     | 2.577     | 71826   | 8204    | 0.000   |      | V    |      |
| 5     | 8.674     | 1957407 | 341293  | 0.000   |      |      |      |
| 6     | 9.694     | 3426832 | 585637  | 325.478 | uM   |      | MHET |
| 7     | 10.453    | 5372    | 560     | -2.186  | uM   |      | BHET |
| 8     | 10.913    | 132546  | 17279   | 0.000   |      | V    |      |
| 9     | 14.028    | 17966   | 2331    | 0.000   |      |      |      |
| Total |           | 6342440 | 1053674 |         |      |      |      |

## PDA Ch2 240nm

| Peak# | Ret. Time | Area    | Height  | Conc.   | Unit | Mark | Name |
|-------|-----------|---------|---------|---------|------|------|------|
| 1     | 2.067     | 719636  | 79902   | 0.000   |      |      |      |
| 2     | 2.371     | 308639  | 54799   | 0.000   |      | V    |      |
| 3     | 8.674     | 1972137 | 344687  | 187.113 | uM   |      | TPA  |
| 4     | 9.694     | 3390125 | 580604  | 0.000   |      |      |      |
| 5     | 10.913    | 73217   | 13583   | 0.000   |      |      |      |
| Total |           | 6463753 | 1073575 |         |      |      |      |
