# Supplementary material for: A flexible kinetic assay efficiently sorts prospective biocatalysts for PET plastic subunit hydrolysis
Source: Royal Society of Chemistry journal article supplement (doi:10.1039/d2ra00612j), 2022-01-01
Supplement: d2ra00612j1.zip [file E11 pH7 37C.pdf › 2021 Beech BHET SI/HPLC PDF Reports/37C pH7/E11 pH7 37C.pdf]

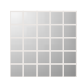

SHIMADZU  
LabSolutions

# Analysis Report

## <Sample Information>

|                  |                                          |              |                        |
|------------------|------------------------------------------|--------------|------------------------|
| Sample Name      | : E11 pH7                                |              |                        |
| Sample ID        | :                                        |              |                        |
| Data Filename    | : E11 pH7_027.lcd                        |              |                        |
| Method Filename  | : MHET_BHET_rpamide_060721.lcm           |              |                        |
| Batch Filename   | : BHET_Colorimetric_37C_pH7_09072021.lcb |              |                        |
| Vial #           | : 3-11                                   | Sample Type  | : Unknown              |
| Injection Volume | : 10 uL                                  |              |                        |
| Date Acquired    | : 9/7/2021 9:57:24 PM                    | Acquired by  | : System Administrator |
| Date Processed   | : 9/8/2021 10:30:12 AM                   | Processed by | : System Administrator |

## <Chromatogram>

mAU

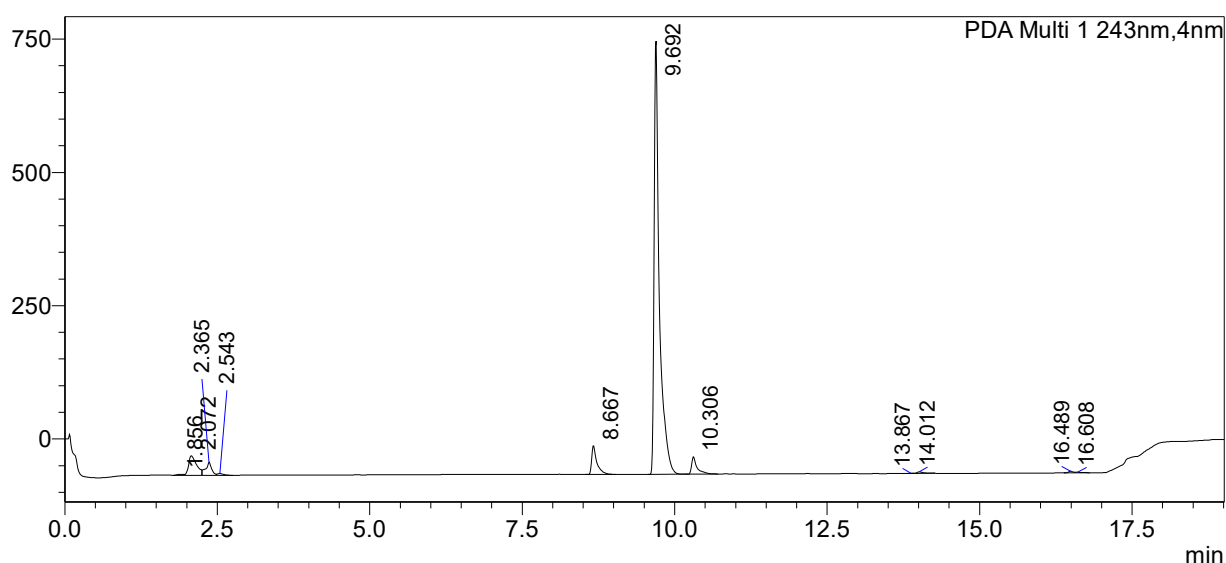

mAU

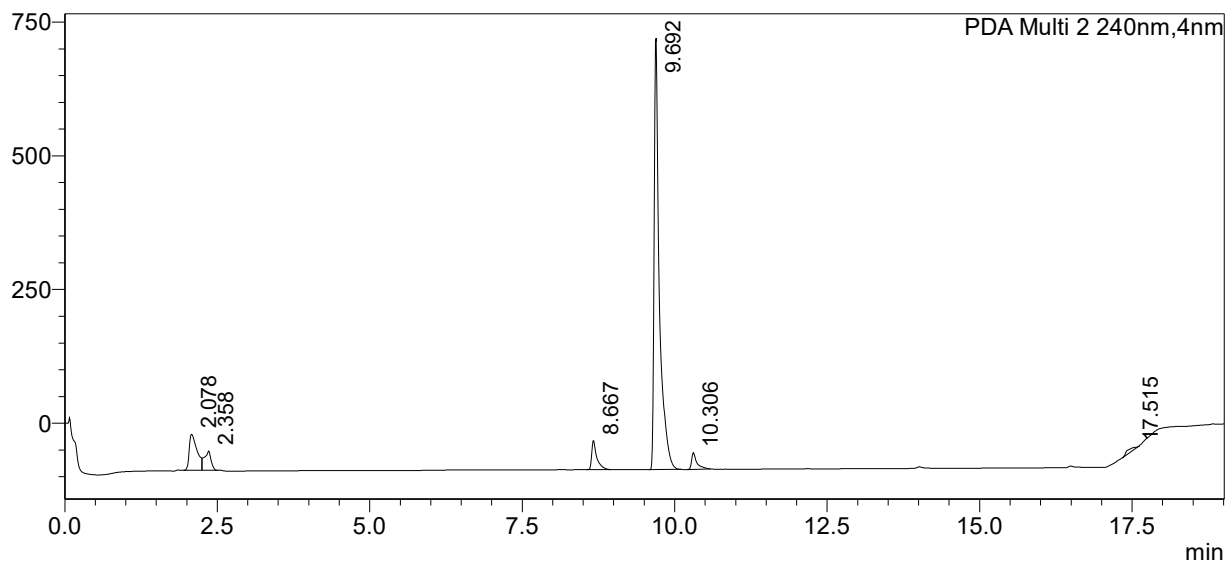

## <Peak Table>

PDA Ch1 243nm

| Peak# | Ret. Time | Area    | Height | Conc.   | Unit | Mark | Name |
|-------|-----------|---------|--------|---------|------|------|------|
| 1     | 1.856     | 12843   | 1427   | 0.000   |      |      |      |
| 2     | 2.072     | 339485  | 36680  | 0.000   |      | V    |      |
| 3     | 2.365     | 165467  | 24299  | 0.000   |      | V    |      |
| 4     | 2.543     | 22136   | 3277   | 0.000   |      | V    |      |
| 5     | 8.667     | 317461  | 53390  | 0.000   |      |      |      |
| 6     | 9.692     | 4895040 | 812572 | 474.681 | uM   |      | MHET |
| 7     | 10.306    | 202341  | 32284  | 14.428  | uM   |      | BHET |
| 8     | 13.867    | 2702    | 525    | 0.000   |      |      |      |
| 9     | 14.012    | 20474   | 2881   | 0.000   |      | V    |      |
| 10    | 16.489    | 17018   | 3141   | 0.000   |      |      |      |
| 11    | 16.608    | 7539    | 1166   | 0.000   |      | V    |      |
| Total |           | 6002506 | 971642 |         |      |      |      |

## PDA Ch2 240nm

| Peak# | Ret. Time | Area    | Height | Conc.  | Unit | Mark | Name |
|-------|-----------|---------|--------|--------|------|------|------|
| 1     | 2.078     | 619593  | 67331  | 0.000  |      |      |      |
| 2     | 2.358     | 269324  | 36292  | 0.000  |      | V    |      |
| 3     | 8.667     | 315529  | 53723  | 25.066 | uM   |      | TPA  |
| 4     | 9.692     | 4846599 | 806647 | 0.000  |      |      |      |
| 5     | 10.306    | 185425  | 31077  | 0.000  |      |      |      |
| 6     | 17.515    | 73401   | 4921   | 0.000  |      |      |      |
| Total |           | 6309871 | 999990 |        |      |      |      |
