# Supplementary material for: A flexible kinetic assay efficiently sorts prospective biocatalysts for PET plastic subunit hydrolysis
Source: Royal Society of Chemistry journal article supplement (doi:10.1039/d2ra00612j), 2022-01-01
Supplement: d2ra00612j1.zip [file E12 37C pH8.pdf › 2021 Beech BHET SI/HPLC PDF Reports/37C pH8/E12 37C pH8.pdf]

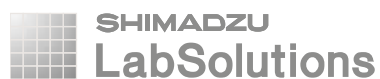

# Analysis Report

## <Sample Information>

|                  |                                                    |                                     |
|------------------|----------------------------------------------------|-------------------------------------|
| Sample Name      | : E12                                              |                                     |
| Sample ID        | :                                                  |                                     |
| Data Filename    | : E12_013.lcd                                      |                                     |
| Method Filename  | : MHET_BHET_rpamide_060721.lcm                     |                                     |
| Batch Filename   | : BHET_Colorimetric_37C_pH8_plate1_Commercials.lcb |                                     |
| Vial #           | : 3-6                                              | Sample Type : Unknown               |
| Injection Volume | : 10 uL                                            |                                     |
| Date Acquired    | : 8/25/2021 11:10:58 AM                            | Acquired by : System Administrator  |
| Date Processed   | : 9/3/2021 9:02:37 AM                              | Processed by : System Administrator |

## <Chromatogram>

mAU

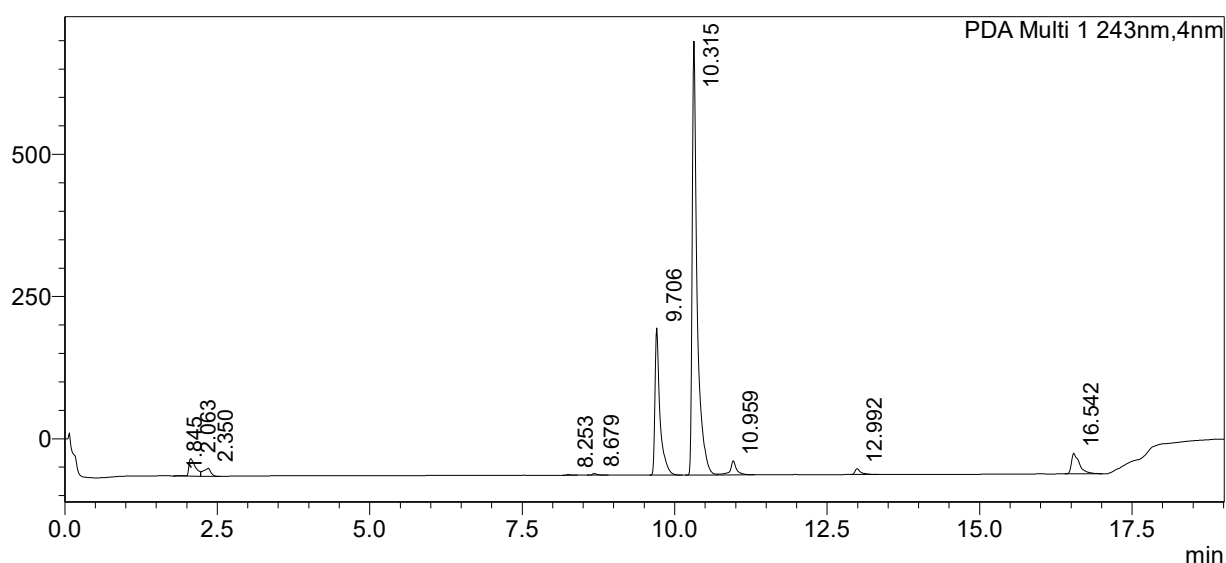

mAU

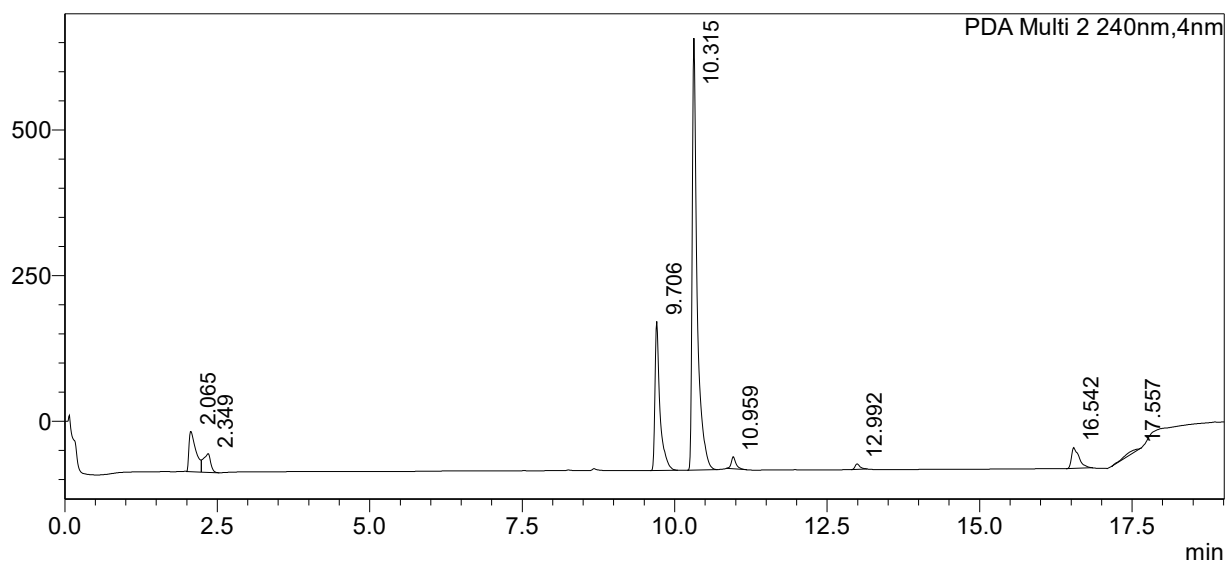

## <Peak Table>

PDA Ch1 243nm

| Peak# | Ret. Time | Area    | Height  | Conc.   | Unit | Mark | Name |
|-------|-----------|---------|---------|---------|------|------|------|
| 1     | 1.845     | 7719    | 637     | 0.000   |      |      |      |
| 2     | 2.063     | 236320  | 30727   | 0.000   |      | V    |      |
| 3     | 2.350     | 118078  | 14185   | 0.000   |      | V    |      |
| 4     | 8.253     | 5595    | 1188    | 0.000   |      |      |      |
| 5     | 8.679     | 16832   | 3036    | 0.000   |      |      |      |
| 6     | 9.706     | 1473190 | 258768  | 133.326 | uM   |      | MHET |
| 7     | 10.315    | 4362271 | 762960  | 427.132 | uM   |      | BHET |
| 8     | 10.959    | 181085  | 24790   | 0.000   |      | V    |      |
| 9     | 12.992    | 69454   | 10355   | 0.000   |      |      |      |
| 10    | 16.542    | 326557  | 35933   | 0.000   |      |      |      |
| Total |           | 6797102 | 1142579 |         |      |      |      |

## PDA Ch2 240nm

| Peak# | Ret. Time | Area    | Height  | Conc. | Unit | Mark | Name |
|-------|-----------|---------|---------|-------|------|------|------|
| 1     | 2.065     | 564150  | 68798   | 0.000 |      |      |      |
| 2     | 2.349     | 256947  | 32069   | 0.000 |      | V    |      |
| 3     | 9.706     | 1452684 | 255954  | 0.000 |      |      |      |
| 4     | 10.315    | 4217804 | 741330  | 0.000 |      |      |      |
| 5     | 10.959    | 112272  | 20503   | 0.000 |      |      |      |
| 6     | 12.992    | 54072   | 9655    | 0.000 |      |      |      |
| 7     | 16.542    | 307674  | 35677   | 0.000 |      |      |      |
| 8     | 17.557    | 86673   | 3254    | 0.000 |      |      |      |
| Total |           | 7052275 | 1167238 |       |      |      |      |
