# Supplementary material for: A flexible kinetic assay efficiently sorts prospective biocatalysts for PET plastic subunit hydrolysis
Source: Royal Society of Chemistry journal article supplement (doi:10.1039/d2ra00612j), 2022-01-01
Supplement: d2ra00612j1.zip [file E13 37C pH8.pdf › 2021 Beech BHET SI/HPLC PDF Reports/37C pH8/E13 37C pH8.pdf]

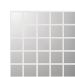SHIMADZU  
LabSolutions

# Analysis Report

## <Sample Information>

|                  |                                                    |                                     |
|------------------|----------------------------------------------------|-------------------------------------|
| Sample Name      | : E13                                              |                                     |
| Sample ID        | :                                                  |                                     |
| Data Filename    | : E13_016.lcd                                      |                                     |
| Method Filename  | : MHET_BHET_rpamide_060721.lcm                     |                                     |
| Batch Filename   | : BHET_Colorimetric_37C_pH8_plate1_Commercials.lcb |                                     |
| Vial #           | : 3-9                                              | Sample Type : Unknown               |
| Injection Volume | : 10 uL                                            |                                     |
| Date Acquired    | : 8/25/2021 12:09:02 PM                            | Acquired by : System Administrator  |
| Date Processed   | : 9/3/2021 9:02:42 AM                              | Processed by : System Administrator |

## <Chromatogram>

mAU

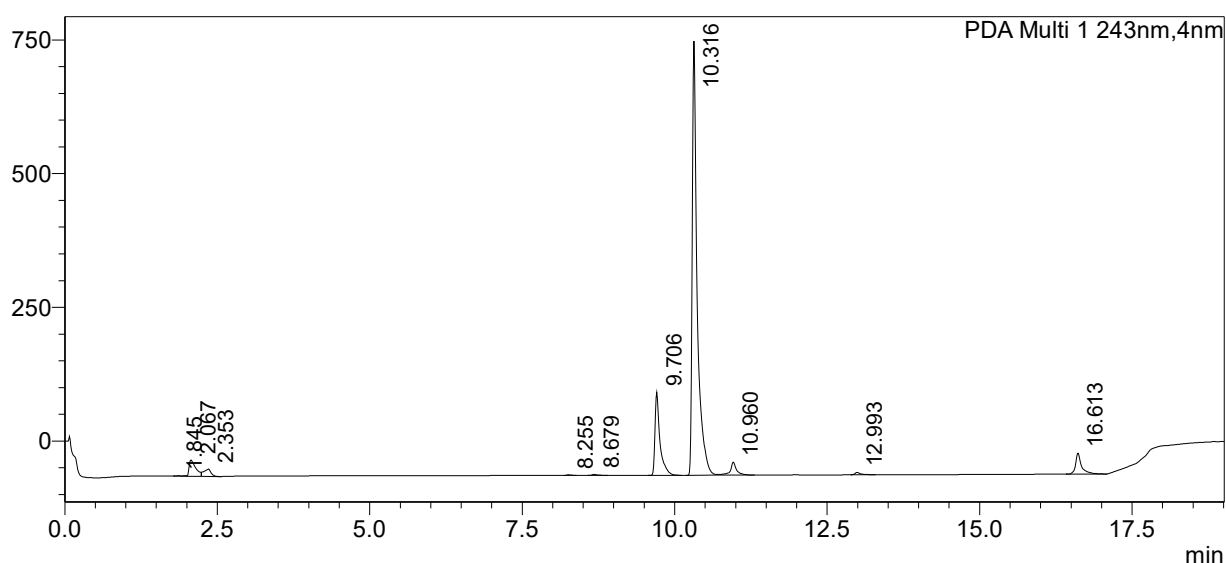

mAU

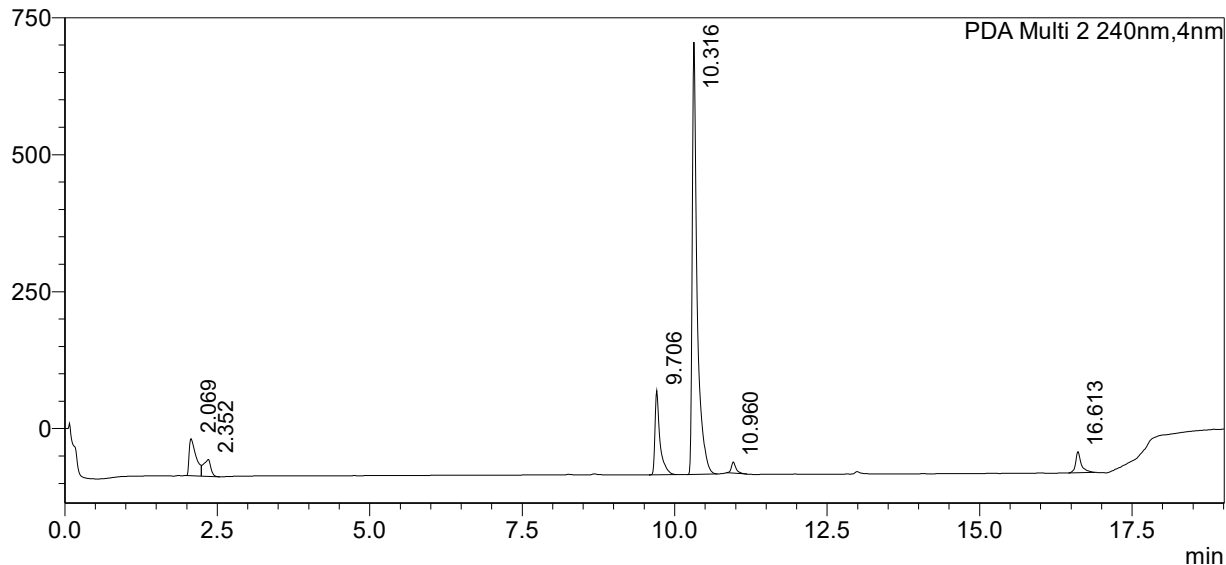

## <Peak Table>

PDA Ch1 243nm

| Peak# | Ret. Time | Area    | Height  | Conc.   | Unit | Mark | Name |
|-------|-----------|---------|---------|---------|------|------|------|
| 1     | 1.845     | 8122    | 623     | 0.000   |      |      |      |
| 2     | 2.067     | 234653  | 30223   | 0.000   |      | V    |      |
| 3     | 2.353     | 110492  | 13660   | 0.000   |      | V    |      |
| 4     | 8.255     | 4743    | 1143    | 0.000   |      |      |      |
| 5     | 8.679     | 10353   | 1840    | 0.000   |      |      |      |
| 6     | 9.706     | 881757  | 154810  | 78.055  | uM   |      | MHET |
| 7     | 10.316    | 4645533 | 811676  | 454.090 | uM   |      | BHET |
| 8     | 10.960    | 178363  | 24274   | 0.000   |      | V    |      |
| 9     | 12.993    | 30926   | 4628    | 0.000   |      |      |      |
| 10    | 16.613    | 271561  | 39003   | 0.000   |      |      |      |
| Total |           | 6376503 | 1081881 |         |      |      |      |

## PDA Ch2 240nm

| Peak# | Ret. Time | Area    | Height  | Conc. | Unit | Mark | Name |
|-------|-----------|---------|---------|-------|------|------|------|
| 1     | 2.069     | 547343  | 67708   | 0.000 |      |      |      |
| 2     | 2.352     | 250976  | 30727   | 0.000 |      | V    |      |
| 3     | 9.706     | 866643  | 153015  | 0.000 |      |      |      |
| 4     | 10.316    | 4493305 | 788949  | 0.000 |      |      |      |
| 5     | 10.960    | 111085  | 20116   | 0.000 |      |      |      |
| 6     | 16.613    | 247441  | 38196   | 0.000 |      |      |      |
| Total |           | 6516794 | 1098711 |       |      |      |      |
