# Supplementary material for: A flexible kinetic assay efficiently sorts prospective biocatalysts for PET plastic subunit hydrolysis
Source: Royal Society of Chemistry journal article supplement (doi:10.1039/d2ra00612j), 2022-01-01
Supplement: d2ra00612j1.zip [file E14 37C pH8.pdf › 2021 Beech BHET SI/HPLC PDF Reports/37C pH8/E14 37C pH8.pdf]

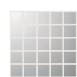SHIMADZU  
LabSolutions

## Analysis Report

## &lt;Sample Information&gt;

Sample Name : E14  
Sample ID :  
Data Filename : E14\_018.lcd  
Method Filename : MHET\_BHET\_rpamide\_060721.lcm  
Batch Filename : BHET\_Colorimetric\_37C\_pH8\_plate1\_Commercials.lcb  
Vial # : 3-11 Sample Type : Unknown  
Injection Volume : 10 uL  
Date Acquired : 8/25/2021 12:47:43 PM Acquired by : System Administrator  
Date Processed : 9/3/2021 9:02:46 AM Processed by : System Administrator

## &lt;Chromatogram&gt;

mAU

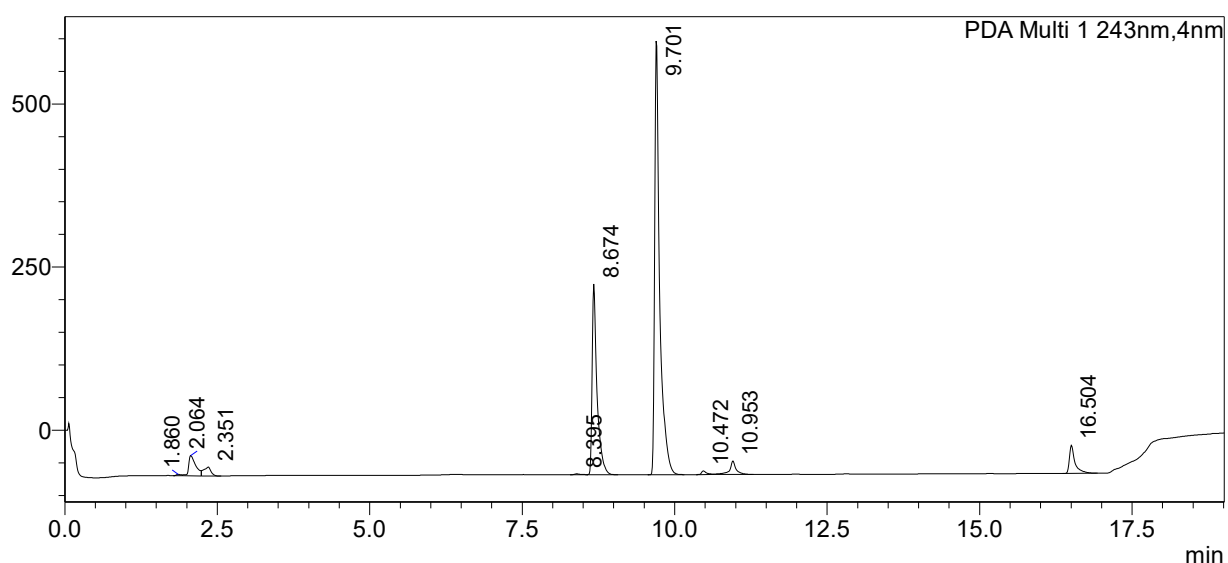

mAU

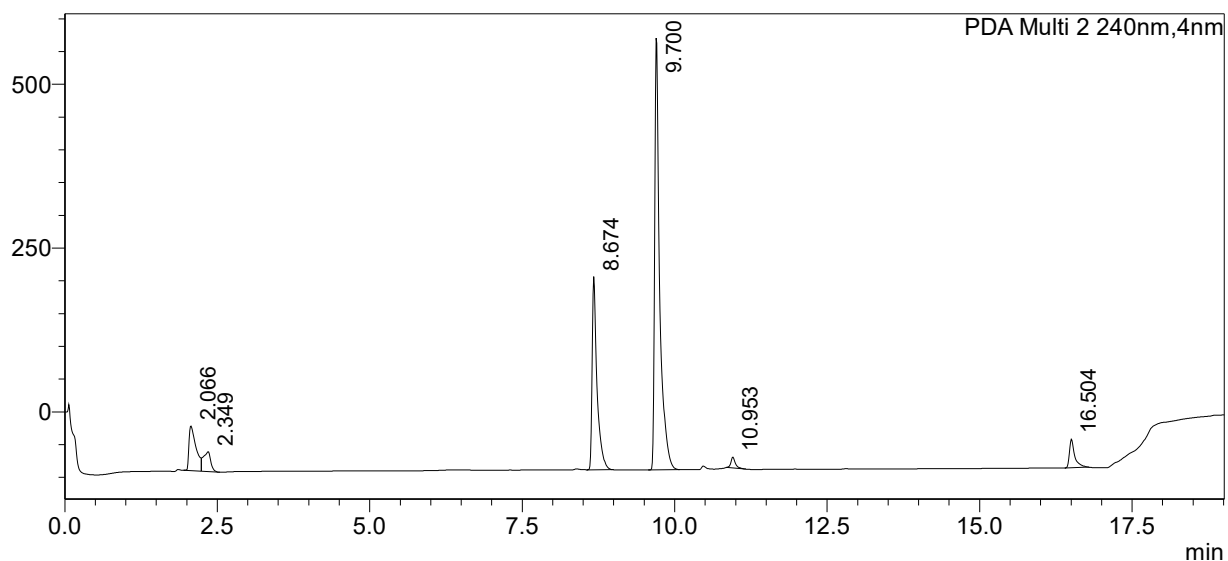

## &lt;Peak Table&gt;

PDA Ch1 243nm

| Peak# | Ret. Time | Area    | Height  | Conc.   | Unit | Mark | Name |
|-------|-----------|---------|---------|---------|------|------|------|
| 1     | 1.860     | 12257   | 2150    | 0.000   |      |      |      |
| 2     | 2.064     | 256756  | 31040   | 0.000   |      | V    |      |
| 3     | 2.351     | 112882  | 13578   | 0.000   |      | V    |      |
| 4     | 8.395     | 8274    | 1286    | 0.000   |      |      |      |
| 5     | 8.674     | 1643709 | 292321  | 0.000   |      | V    |      |
| 6     | 9.701     | 3849508 | 664515  | 364.631 | uM   |      | MHET |
| 7     | 10.472    | 32686   | 5586    | 0.428   | uM   |      | BHET |
| 8     | 10.953    | 153222  | 20781   | 0.000   |      | V    |      |
| 9     | 16.504    | 273325  | 43007   | 0.000   |      |      |      |
| Total |           | 6342618 | 1074265 |         |      |      |      |

## PDA Ch2 240nm

| Peak# | Ret. Time | Area    | Height  | Conc.   | Unit | Mark | Name |
|-------|-----------|---------|---------|---------|------|------|------|
| 1     | 2.066     | 563821  | 67870   | 0.000   |      |      |      |
| 2     | 2.349     | 249159  | 30425   | 0.000   |      | V    |      |
| 3     | 8.674     | 1650984 | 294779  | 154.135 | uM   |      | TPA  |
| 4     | 9.700     | 3808221 | 658888  | 0.000   |      |      |      |
| 5     | 10.953    | 85554   | 16633   | 0.000   |      |      |      |
| 6     | 16.504    | 263937  | 43300   | 0.000   |      |      |      |
| Total |           | 6621675 | 1111896 |         |      |      |      |
