# Supplementary material for: A flexible kinetic assay efficiently sorts prospective biocatalysts for PET plastic subunit hydrolysis
Source: Royal Society of Chemistry journal article supplement (doi:10.1039/d2ra00612j), 2022-01-01
Supplement: d2ra00612j1.zip [file E15 37C pH8.pdf › 2021 Beech BHET SI/HPLC PDF Reports/37C pH8/E15 37C pH8.pdf]

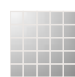SHIMADZU  
LabSolutions

## Analysis Report

## &lt;Sample Information&gt;

|                  |                                                    |                                     |
|------------------|----------------------------------------------------|-------------------------------------|
| Sample Name      | : E15                                              |                                     |
| Sample ID        | :                                                  |                                     |
| Data Filename    | : E15_025.lcd                                      |                                     |
| Method Filename  | : MHET_BHET_rpamide_060721.lcm                     |                                     |
| Batch Filename   | : BHET_Colorimetric_37C_pH8_plate1_Commercials.lcb |                                     |
| Vial #           | : 3-18                                             | Sample Type : Unknown               |
| Injection Volume | : 10 uL                                            |                                     |
| Date Acquired    | : 8/25/2021 3:03:08 PM                             | Acquired by : System Administrator  |
| Date Processed   | : 9/3/2021 9:02:59 AM                              | Processed by : System Administrator |

## &lt;Chromatogram&gt;

mAU

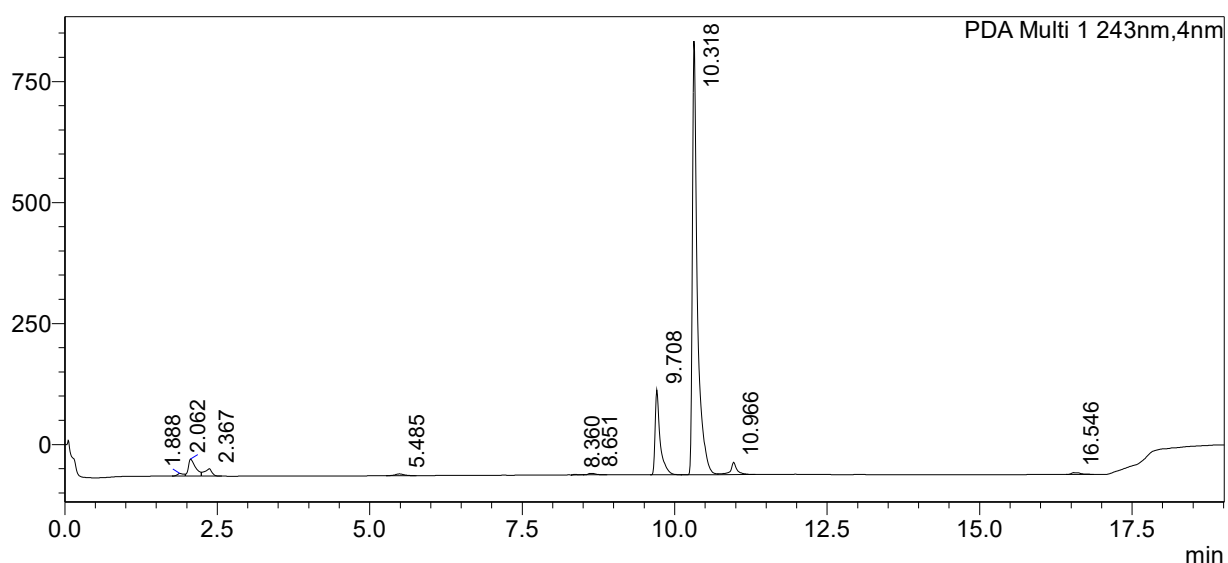

mAU

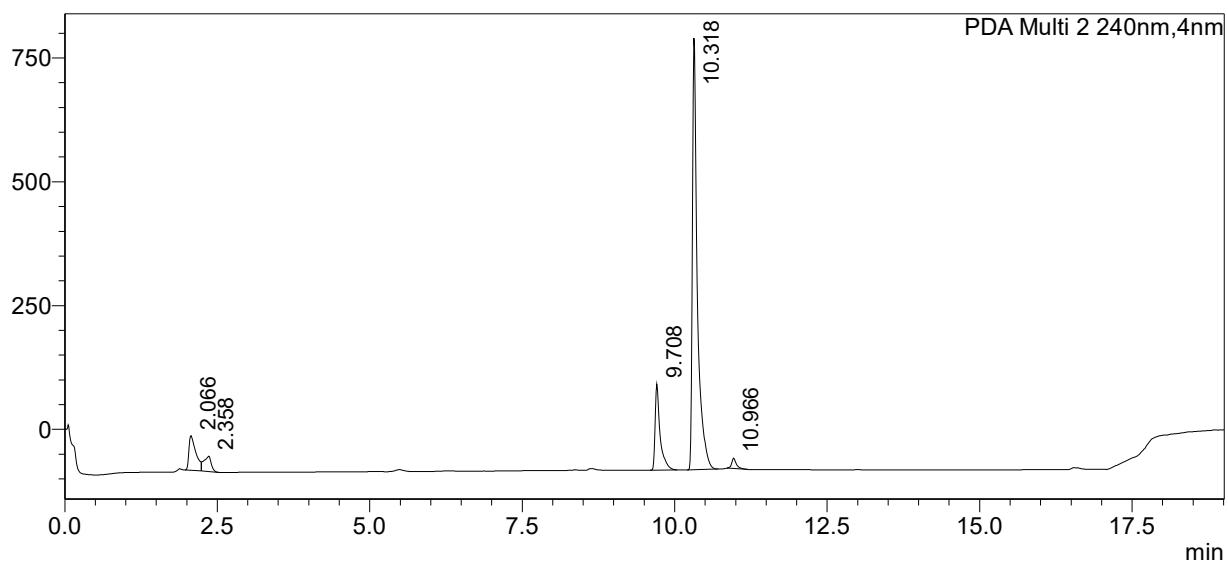

## &lt;Peak Table&gt;

PDA Ch1 243nm

| Peak# | Ret. Time | Area    | Height  | Conc.   | Unit | Mark | Name |
|-------|-----------|---------|---------|---------|------|------|------|
| 1     | 1.888     | 39689   | 5505    | 0.000   |      |      |      |
| 2     | 2.062     | 288949  | 35147   | 0.000   |      | V    |      |
| 3     | 2.367     | 124531  | 15159   | 0.000   |      | V    |      |
| 4     | 5.485     | 39991   | 3806    | 0.000   |      |      |      |
| 5     | 8.360     | 6483    | 1349    | 0.000   |      |      |      |
| 6     | 8.651     | 25905   | 2966    | 0.000   |      | V    |      |
| 7     | 9.708     | 1002716 | 175311  | 89.186  | uM   |      | MHET |
| 8     | 10.318    | 5185030 | 895873  | 506.691 | uM   | V    | BHET |
| 9     | 10.966    | 184074  | 25296   | 0.000   |      | V    |      |
| 10    | 16.546    | 37725   | 3655    | 0.000   |      |      |      |
| Total |           | 6935095 | 1164067 |         |      |      |      |

## PDA Ch2 240nm

| Peak# | Ret. Time | Area    | Height  | Conc. | Unit | Mark | Name |
|-------|-----------|---------|---------|-------|------|------|------|
| 1     | 2.066     | 566557  | 69522   | 0.000 |      |      |      |
| 2     | 2.358     | 254811  | 31138   | 0.000 |      | V    |      |
| 3     | 9.708     | 986411  | 173289  | 0.000 |      |      |      |
| 4     | 10.318    | 5016353 | 871529  | 0.000 |      |      |      |
| 5     | 10.966    | 111578  | 20840   | 0.000 |      |      |      |
| Total |           | 6935709 | 1166318 |       |      |      |      |
