# Supplementary material for: A flexible kinetic assay efficiently sorts prospective biocatalysts for PET plastic subunit hydrolysis
Source: Royal Society of Chemistry journal article supplement (doi:10.1039/d2ra00612j), 2022-01-01
Supplement: d2ra00612j1.zip [file E16 37C pH8.pdf › 2021 Beech BHET SI/HPLC PDF Reports/37C pH8/E16 37C pH8.pdf]

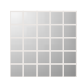SHIMADZU  
LabSolutions

## Analysis Report

## &lt;Sample Information&gt;

|                  |                                                    |                                     |
|------------------|----------------------------------------------------|-------------------------------------|
| Sample Name      | : E16                                              |                                     |
| Sample ID        | :                                                  |                                     |
| Data Filename    | : E16_031.lcd                                      |                                     |
| Method Filename  | : MHET_BHET_rpamide_060721.lcm                     |                                     |
| Batch Filename   | : BHET_Colorimetric_37C_pH8_plate1_Commercials.lcb |                                     |
| Vial #           | : 3-24                                             | Sample Type : Unknown               |
| Injection Volume | : 10 uL                                            |                                     |
| Date Acquired    | : 8/25/2021 4:59:10 PM                             | Acquired by : System Administrator  |
| Date Processed   | : 9/3/2021 9:03:10 AM                              | Processed by : System Administrator |

## &lt;Chromatogram&gt;

mAU

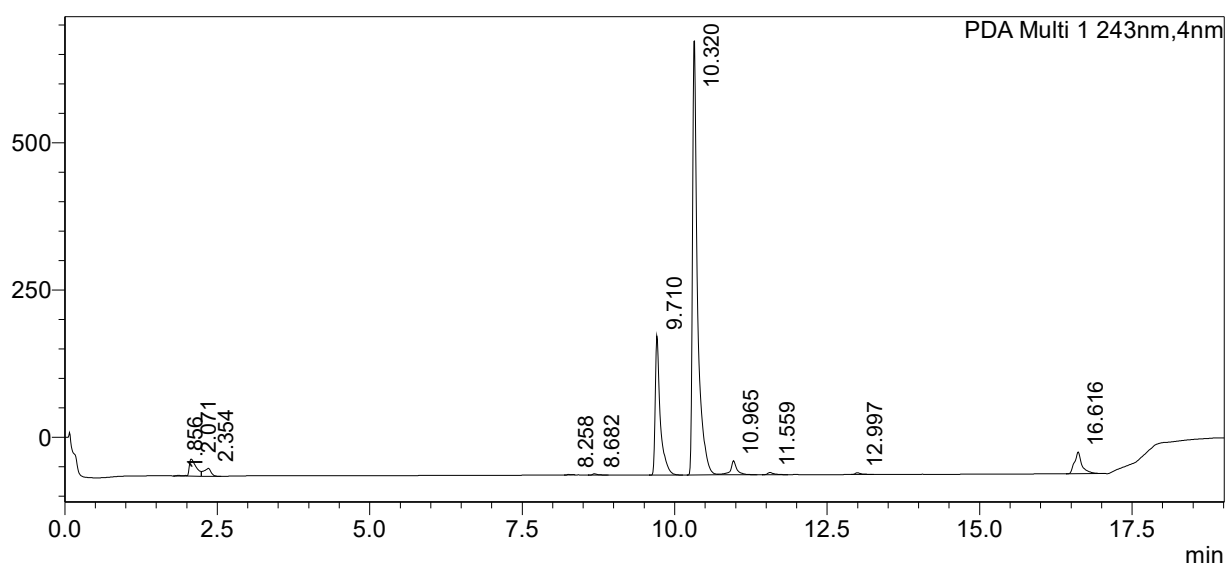

mAU

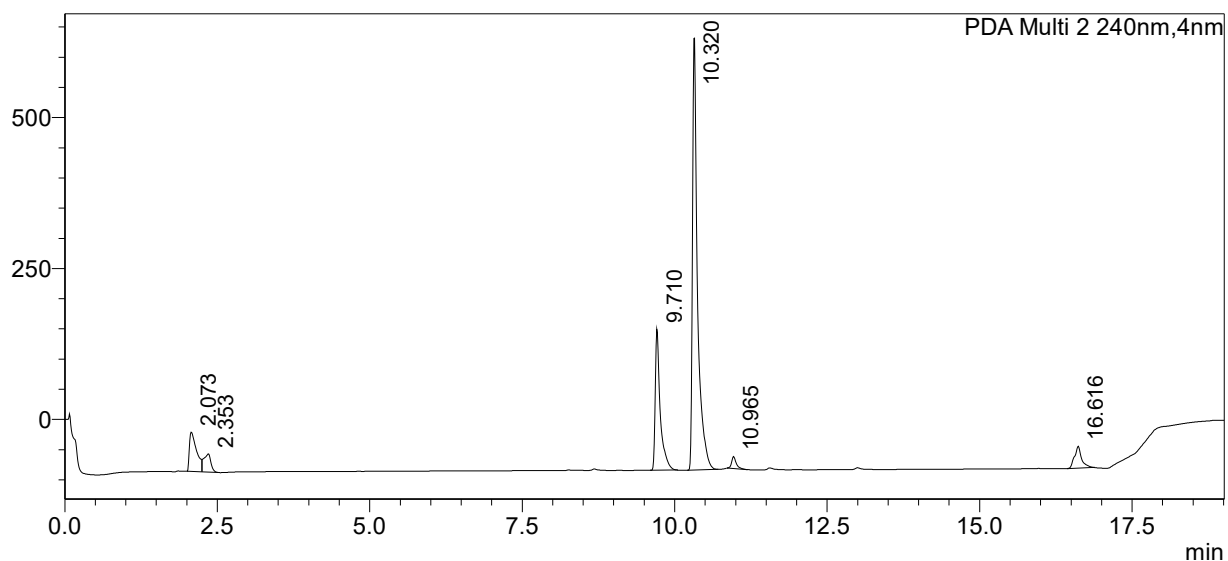

## &lt;Peak Table&gt;

PDA Ch1 243nm

| Peak# | Ret. Time | Area    | Height  | Conc.   | Unit | Mark | Name |
|-------|-----------|---------|---------|---------|------|------|------|
| 1     | 1.856     | 9323    | 971     | 0.000   |      |      |      |
| 2     | 2.071     | 231639  | 29207   | 0.000   |      | V    |      |
| 3     | 2.354     | 111009  | 13483   | 0.000   |      | V    |      |
| 4     | 8.258     | 3605    | 962     | 0.000   |      |      |      |
| 5     | 8.682     | 13327   | 2415    | 0.000   |      |      |      |
| 6     | 9.710     | 1358657 | 236295  | 121.939 | uM   |      | MHET |
| 7     | 10.320    | 4305962 | 736291  | 421.773 | uM   |      | BHET |
| 8     | 10.965    | 175642  | 24088   | 0.000   |      | V    |      |
| 9     | 11.559    | 28161   | 3908    | 0.000   |      |      |      |
| 10    | 12.997    | 19807   | 3035    | 0.000   |      |      |      |
| 11    | 16.616    | 314900  | 37021   | 0.000   |      |      |      |
| Total |           | 6572033 | 1087675 |         |      |      |      |

## PDA Ch2 240nm

| Peak# | Ret. Time | Area    | Height  | Conc. | Unit | Mark | Name |
|-------|-----------|---------|---------|-------|------|------|------|
| 1     | 2.073     | 553715  | 65403   | 0.000 |      |      |      |
| 2     | 2.353     | 239504  | 30366   | 0.000 |      | V    |      |
| 3     | 9.710     | 1338443 | 233677  | 0.000 |      |      |      |
| 4     | 10.320    | 4163018 | 715240  | 0.000 |      |      |      |
| 5     | 10.965    | 107187  | 19830   | 0.000 |      |      |      |
| 6     | 16.616    | 292550  | 36262   | 0.000 |      |      |      |
| Total |           | 6694417 | 1100779 |       |      |      |      |
