# Supplementary material for: A flexible kinetic assay efficiently sorts prospective biocatalysts for PET plastic subunit hydrolysis
Source: Royal Society of Chemistry journal article supplement (doi:10.1039/d2ra00612j), 2022-01-01
Supplement: d2ra00612j1.zip [file E17 37C pH8.pdf › 2021 Beech BHET SI/HPLC PDF Reports/37C pH8/E17 37C pH8.pdf]

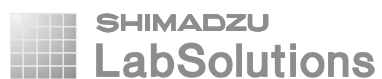

# Analysis Report

## <Sample Information>

|                  |                                                    |                                     |
|------------------|----------------------------------------------------|-------------------------------------|
| Sample Name      | : E17                                              |                                     |
| Sample ID        | :                                                  |                                     |
| Data Filename    | : E17_034.lcd                                      |                                     |
| Method Filename  | : MHET_BHET_rpamide_060721.lcm                     |                                     |
| Batch Filename   | : BHET_Colorimetric_37C_pH8_plate1_Commercials.lcb |                                     |
| Vial #           | : 3-27                                             | Sample Type : Unknown               |
| Injection Volume | : 10 uL                                            |                                     |
| Date Acquired    | : 8/25/2021 5:57:12 PM                             | Acquired by : System Administrator  |
| Date Processed   | : 9/3/2021 9:03:15 AM                              | Processed by : System Administrator |

## <Chromatogram>

mAU

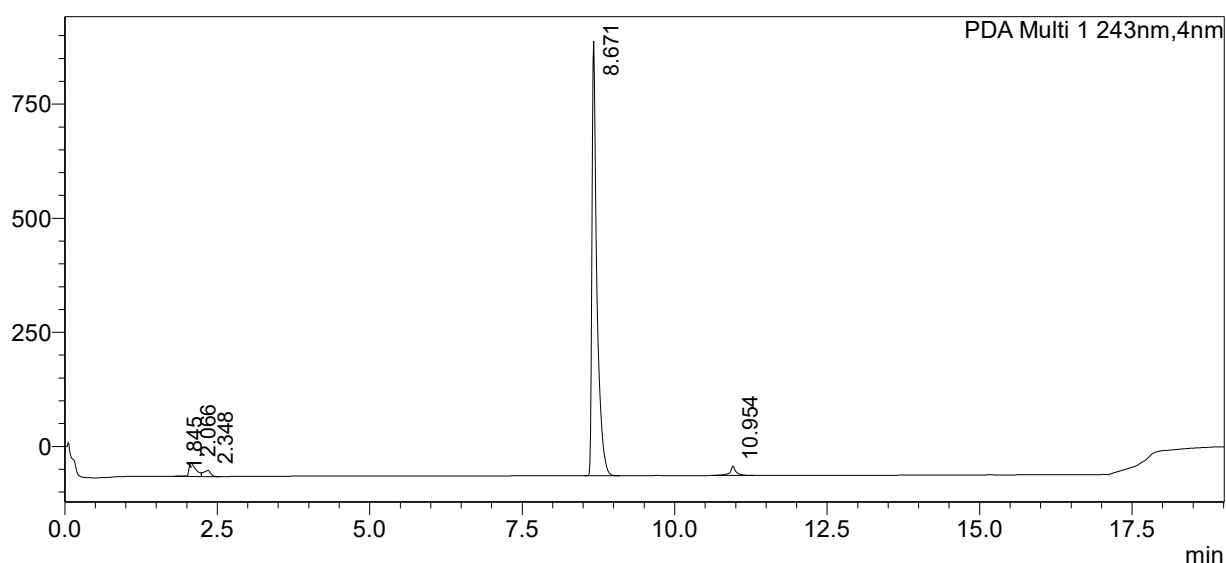

mAU

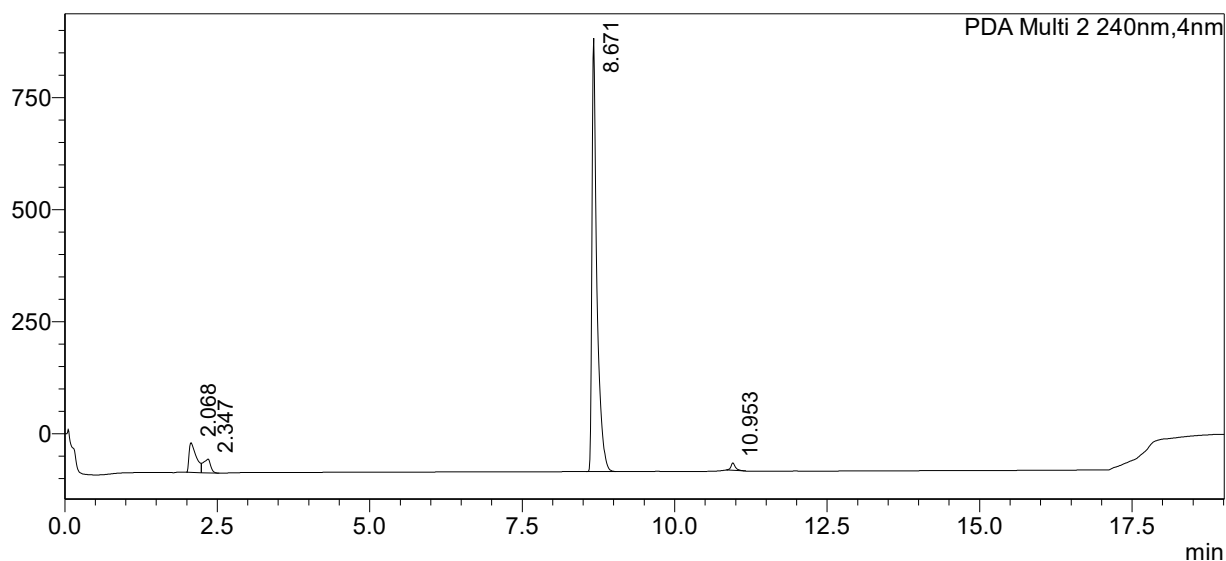

## <Peak Table>

PDA Ch1 243nm

| Peak# | Ret. Time | Area    | Height  | Conc. | Unit | Mark | Name |
|-------|-----------|---------|---------|-------|------|------|------|
| 1     | 1.845     | 8822    | 794     | 0.000 |      |      |      |
| 2     | 2.066     | 238025  | 29370   | 0.000 |      | V    |      |
| 3     | 2.348     | 110668  | 13798   | 0.000 |      | V    |      |
| 4     | 8.671     | 5431477 | 952331  | 0.000 |      |      |      |
| 5     | 10.954    | 144209  | 20218   | 0.000 |      |      |      |
| Total |           | 5933201 | 1016512 |       |      |      |      |

## PDA Ch2 240nm

| Peak# | Ret. Time | Area    | Height  | Conc.   | Unit | Mark | Name |
|-------|-----------|---------|---------|---------|------|------|------|
| 1     | 2.068     | 554609  | 66020   | 0.000   |      |      |      |
| 2     | 2.347     | 251214  | 31138   | 0.000   |      | V    |      |
| 3     | 8.671     | 5496723 | 967049  | 537.532 | uM   |      | TPA  |
| 4     | 10.953    | 84108   | 16308   | 0.000   |      |      |      |
| Total |           | 6386655 | 1080515 |         |      |      |      |
