# Supplementary material for: A flexible kinetic assay efficiently sorts prospective biocatalysts for PET plastic subunit hydrolysis
Source: Royal Society of Chemistry journal article supplement (doi:10.1039/d2ra00612j), 2022-01-01
Supplement: d2ra00612j1.zip [file E18 37C pH8.pdf › 2021 Beech BHET SI/HPLC PDF Reports/37C pH8/E18 37C pH8.pdf]

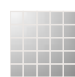SHIMADZU  
LabSolutions

## Analysis Report

## &lt;Sample Information&gt;

|                  |                                                    |                                     |
|------------------|----------------------------------------------------|-------------------------------------|
| Sample Name      | : E18                                              |                                     |
| Sample ID        | :                                                  |                                     |
| Data Filename    | : E18_037.lcd                                      |                                     |
| Method Filename  | : MHET_BHET_rpamide_060721.lcm                     |                                     |
| Batch Filename   | : BHET_Colorimetric_37C_pH8_plate1_Commercials.lcb |                                     |
| Vial #           | : 3-30                                             | Sample Type : Unknown               |
| Injection Volume | : 10 uL                                            |                                     |
| Date Acquired    | : 8/25/2021 6:55:14 PM                             | Acquired by : System Administrator  |
| Date Processed   | : 9/3/2021 9:03:21 AM                              | Processed by : System Administrator |

## &lt;Chromatogram&gt;

mAU

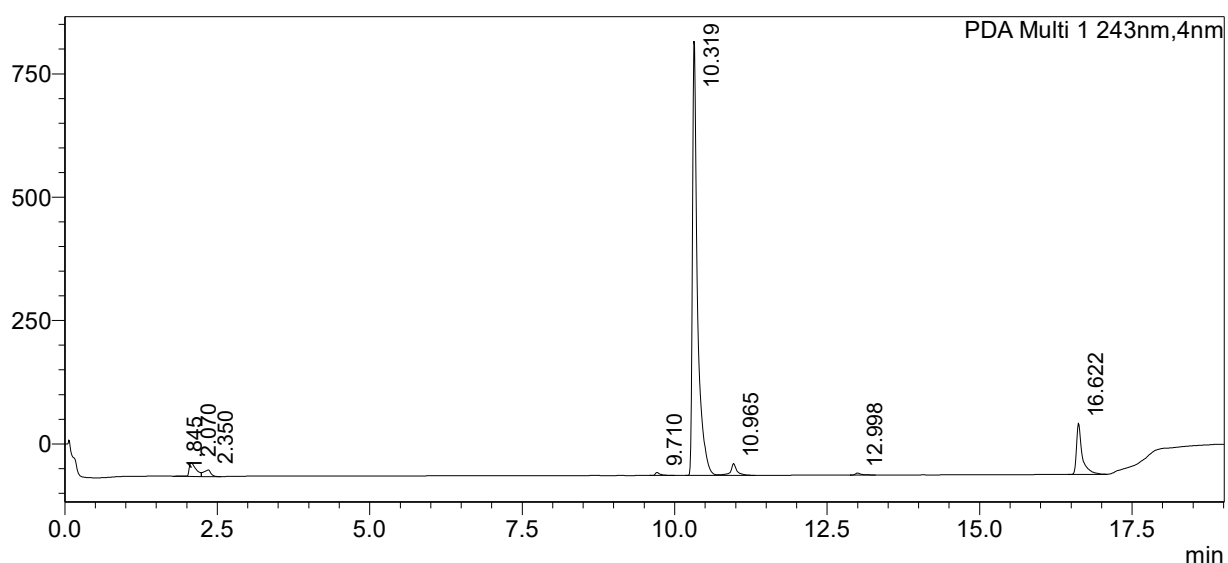

mAU

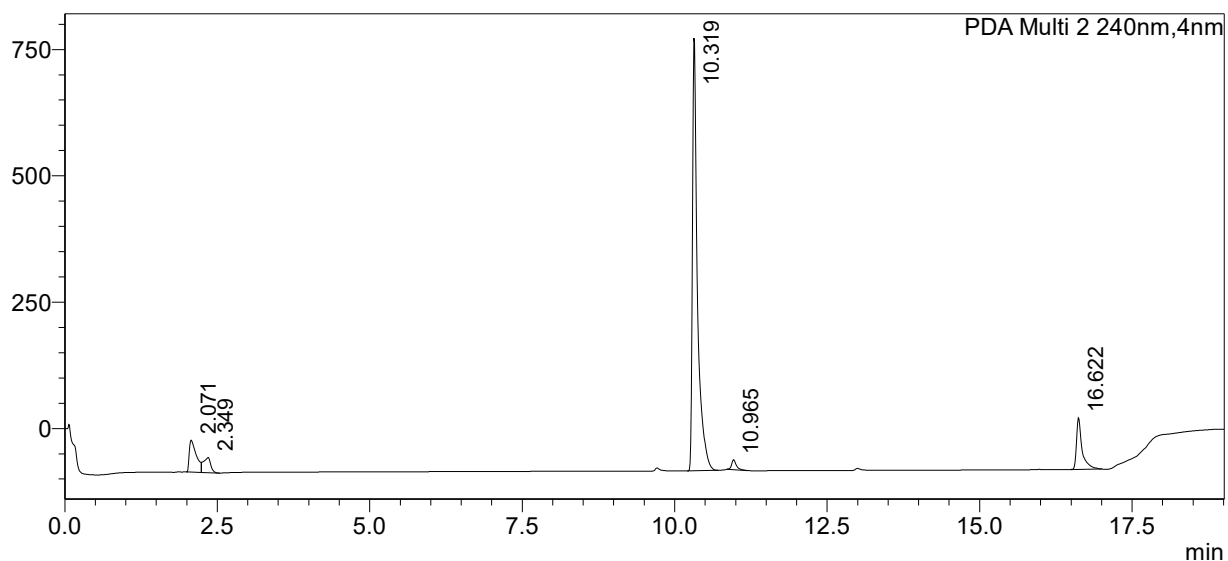

## &lt;Peak Table&gt;

PDA Ch1 243nm

| Peak# | Ret. Time | Area    | Height  | Conc.   | Unit | Mark | Name |
|-------|-----------|---------|---------|---------|------|------|------|
| 1     | 1.845     | 7700    | 611     | 0.000   |      |      |      |
| 2     | 2.070     | 222776  | 28026   | 0.000   |      | V    |      |
| 3     | 2.350     | 107111  | 13322   | 0.000   |      | V    |      |
| 4     | 9.710     | 35887   | 6200    | 0.220   | uM   |      | MHET |
| 5     | 10.319    | 5128896 | 880225  | 500.112 | uM   |      | BHET |
| 6     | 10.965    | 172186  | 23824   | 0.000   |      | V    |      |
| 7     | 12.998    | 28001   | 4121    | 0.000   |      |      |      |
| 8     | 16.622    | 668203  | 103152  | 0.000   |      |      |      |
| Total |           | 6370760 | 1059481 |         |      |      |      |

## PDA Ch2 240nm

| Peak# | Ret. Time | Area    | Height  | Conc. | Unit | Mark | Name |
|-------|-----------|---------|---------|-------|------|------|------|
| 1     | 2.071     | 521014  | 62955   | 0.000 |      |      |      |
| 2     | 2.349     | 243715  | 30100   | 0.000 |      | V    |      |
| 3     | 10.319    | 4963165 | 856162  | 0.000 |      |      |      |
| 4     | 10.965    | 106675  | 19686   | 0.000 |      |      |      |
| 5     | 16.622    | 651020  | 102152  | 0.000 |      |      |      |
| Total |           | 6485589 | 1071056 |       |      |      |      |
