# Supplementary material for: A flexible kinetic assay efficiently sorts prospective biocatalysts for PET plastic subunit hydrolysis
Source: Royal Society of Chemistry journal article supplement (doi:10.1039/d2ra00612j), 2022-01-01
Supplement: d2ra00612j1.zip [file t=0 control 37C pH8.pdf › 2021 Beech BHET SI/HPLC PDF Reports/37C pH8/t=0 control 37C pH8.pdf]

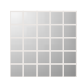SHIMADZU  
LabSolutions

## Analysis Report

## &lt;Sample Information&gt;

Sample Name : t=0 control Plate 1  
Sample ID :  
Data Filename : t=0 control Plate 1\_040.lcd  
Method Filename : MHET\_BHET\_rpamide\_060721.lcm  
Batch Filename : BHET\_Colorimetric\_37C\_pH8\_plate1\_Commercials.lcb  
Vial # : 3-33 Sample Type : Unknown  
Injection Volume : 10 uL  
Date Acquired : 8/25/2021 7:53:14 PM Acquired by : System Administrator  
Date Processed : 9/3/2021 9:03:26 AM Processed by : System Administrator

## &lt;Chromatogram&gt;

mAU

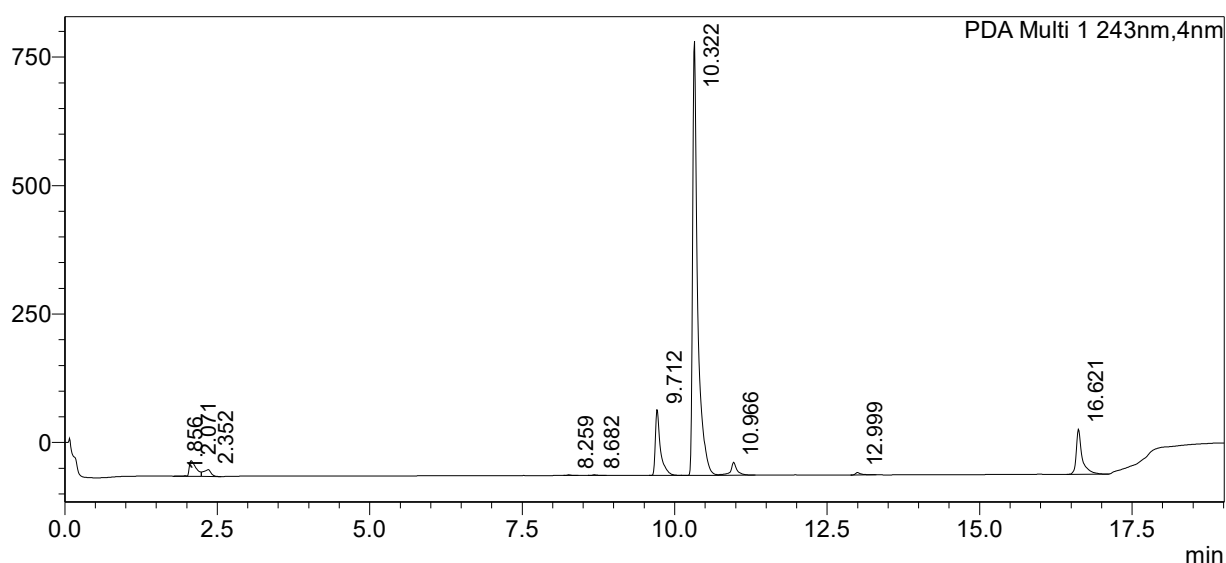

mAU

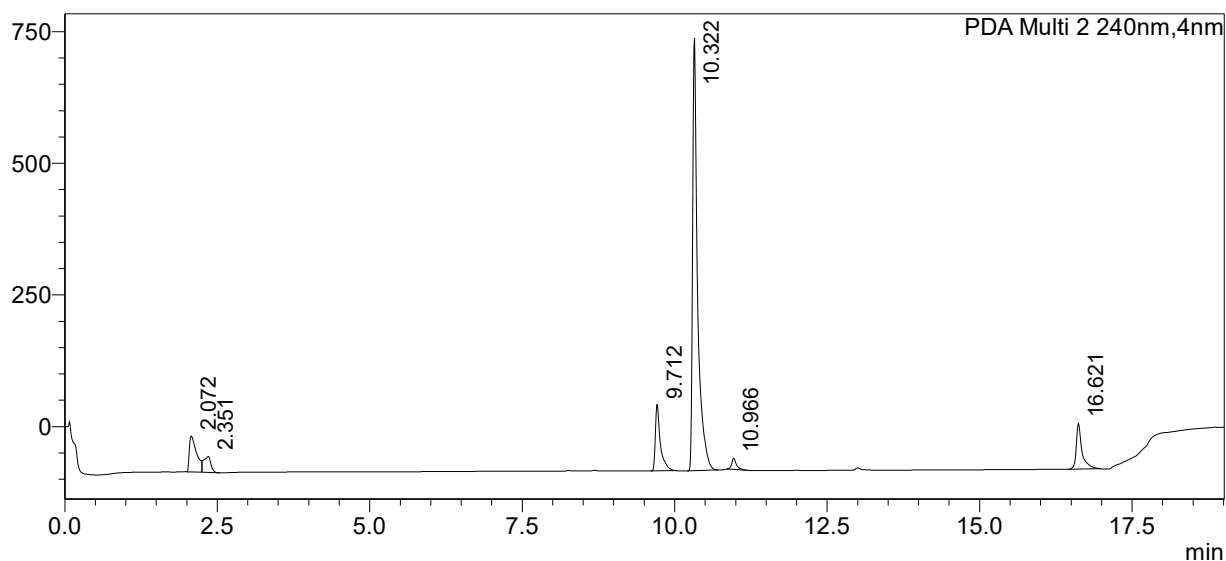

## &lt;Peak Table&gt;

PDA Ch1 243nm

| Peak# | Ret. Time | Area    | Height  | Conc.   | Unit | Mark | Name |
|-------|-----------|---------|---------|---------|------|------|------|
| 1     | 1.856     | 8296    | 740     | 0.000   |      |      |      |
| 2     | 2.071     | 243165  | 30541   | 0.000   |      | V    |      |
| 3     | 2.352     | 113130  | 13449   | 0.000   |      | V    |      |
| 4     | 8.259     | 5605    | 1238    | 0.000   |      |      |      |
| 5     | 8.682     | 7148    | 1312    | 0.000   |      |      |      |
| 6     | 9.712     | 741431  | 127567  | 65.143  | uM   |      | MHET |
| 7     | 10.322    | 4896151 | 844957  | 477.941 | uM   | V    | BHET |
| 8     | 10.966    | 184399  | 25410   | 0.000   |      | V    |      |
| 9     | 12.999    | 30876   | 4567    | 0.000   |      |      |      |
| 10    | 16.621    | 588370  | 87655   | 0.000   |      |      |      |
| Total |           | 6818571 | 1137436 |         |      |      |      |

## PDA Ch2 240nm

| Peak# | Ret. Time | Area    | Height  | Conc. | Unit | Mark | Name |
|-------|-----------|---------|---------|-------|------|------|------|
| 1     | 2.072     | 580697  | 68443   | 0.000 |      |      |      |
| 2     | 2.351     | 242978  | 30367   | 0.000 |      | V    |      |
| 3     | 9.712     | 727606  | 126052  | 0.000 |      |      |      |
| 4     | 10.322    | 4737225 | 821416  | 0.000 |      |      |      |
| 5     | 10.966    | 113676  | 20977   | 0.000 |      |      |      |
| 6     | 16.621    | 567709  | 86712   | 0.000 |      |      |      |
| Total |           | 6969890 | 1153968 |       |      |      |      |
