# Supplementary material for: A flexible kinetic assay efficiently sorts prospective biocatalysts for PET plastic subunit hydrolysis
Source: Royal Society of Chemistry journal article supplement (doi:10.1039/d2ra00612j), 2022-01-01
Supplement: d2ra00612j1.zip [file t=24hr control37C pH8.pdf › 2021 Beech BHET SI/HPLC PDF Reports/37C pH8/t=24hr control37C pH8.pdf]

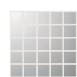SHIMADZU  
LabSolutions

## Analysis Report

## &lt;Sample Information&gt;

|                  |                                                    |                                     |
|------------------|----------------------------------------------------|-------------------------------------|
| Sample Name      | : t=24hr control Plate 1                           |                                     |
| Sample ID        | :                                                  |                                     |
| Data Filename    | : t=24hr control Plate 1_043.lcd                   |                                     |
| Method Filename  | : MHET_BHET_rpamide_060721.lcm                     |                                     |
| Batch Filename   | : BHET_Colorimetric_37C_pH8_plate1_Commercials.lcb |                                     |
| Vial #           | : 3-36                                             | Sample Type : Unknown               |
| Injection Volume | : 10 uL                                            |                                     |
| Date Acquired    | : 8/25/2021 8:51:16 PM                             | Acquired by : System Administrator  |
| Date Processed   | : 9/3/2021 9:03:32 AM                              | Processed by : System Administrator |

## &lt;Chromatogram&gt;

mAU

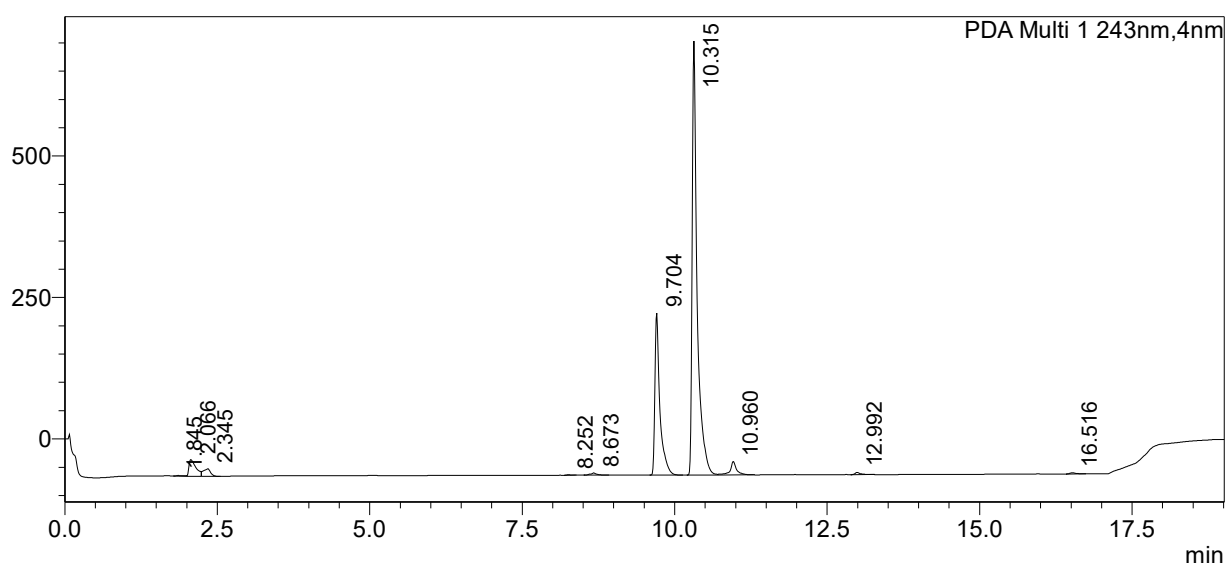

mAU

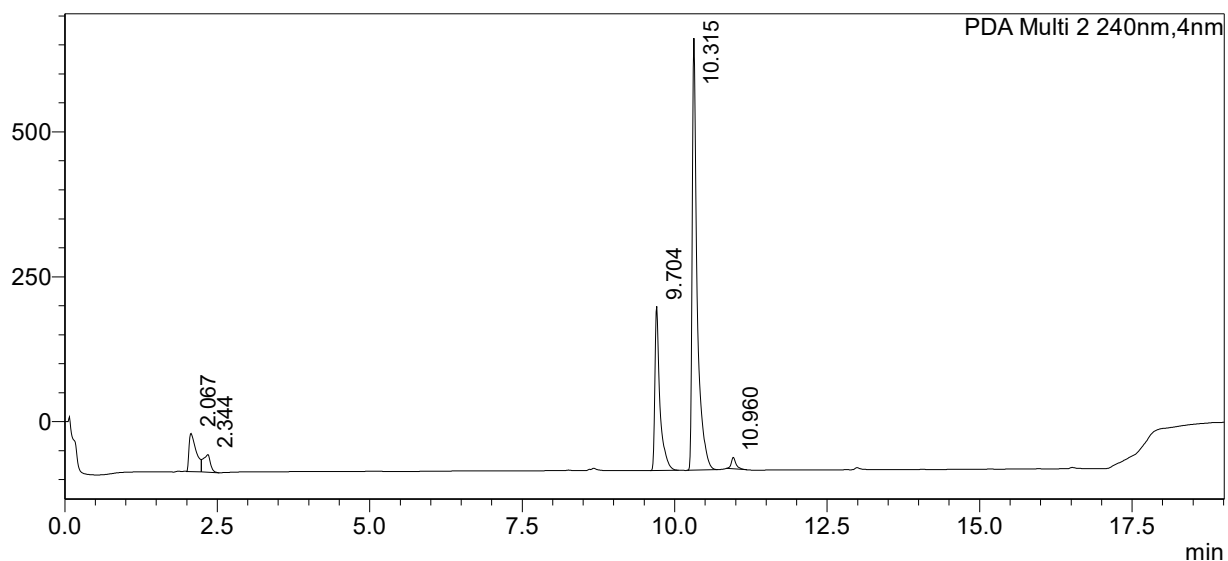

## &lt;Peak Table&gt;

PDA Ch1 243nm

| Peak# | Ret. Time | Area    | Height  | Conc.   | Unit | Mark | Name |
|-------|-----------|---------|---------|---------|------|------|------|
| 1     | 1.845     | 9899    | 994     | 0.000   |      |      |      |
| 2     | 2.066     | 239593  | 29150   | 0.000   |      | V    |      |
| 3     | 2.345     | 107769  | 13479   | 0.000   |      | V    |      |
| 4     | 8.252     | 4114    | 968     | 0.000   |      |      |      |
| 5     | 8.673     | 29213   | 3946    | 0.000   |      |      |      |
| 6     | 9.704     | 1647514 | 286161  | 151.186 | uM   |      | MHET |
| 7     | 10.315    | 4423166 | 767049  | 432.927 | uM   |      | BHET |
| 8     | 10.960    | 175461  | 23838   | 0.000   |      | V    |      |
| 9     | 12.992    | 25111   | 3816    | 0.000   |      |      |      |
| 10    | 16.516    | 13941   | 2169    | 0.000   |      |      |      |
| Total |           | 6675782 | 1131570 |         |      |      |      |

## PDA Ch2 240nm

| Peak# | Ret. Time | Area    | Height  | Conc. | Unit | Mark | Name |
|-------|-----------|---------|---------|-------|------|------|------|
| 1     | 2.067     | 557233  | 65581   | 0.000 |      |      |      |
| 2     | 2.344     | 243376  | 30331   | 0.000 |      | V    |      |
| 3     | 9.704     | 1625422 | 283083  | 0.000 |      |      |      |
| 4     | 10.315    | 4275713 | 745283  | 0.000 |      |      |      |
| 5     | 10.960    | 109237  | 19687   | 0.000 |      |      |      |
| Total |           | 6810980 | 1143965 |       |      |      |      |
