# Supplementary material for: A flexible kinetic assay efficiently sorts prospective biocatalysts for PET plastic subunit hydrolysis
Source: RSC Adv. 2022 Mar 14;12(13):8119–30. doi: 10.1039/d2ra00612j (PMC8982334; doi:10.1039/d2ra00612j)
Supplement: RA-012-D2RA00612J-s002 [file RA-012-D2RA00612J-s002.xlsx]

## Sheet: Abs550
Trial 1
	avg. time [s]	0	899.99	1799.99	2699.99	3599.99	4499.99	5399.99	6299.99	7199.99	8099.99	8999.99	9899.99	10800	11700	12600	13500	14400	15300	16200	17100	18000	18900	19800	20700	21600	22500	23400	24300	25200	26100	27000	27900	28800	29700	30600	31500	32400	33300	34200	35100	36000	36900	37800	38700	39600	40500	41400	42300
	Time (min)	0	14.9998	29.9998	44.9998	59.9998	74.9998	89.9998	105	120	135	150	165	180	195	210	225	240	255	270	285	300	315	330	345	360	375	390	405	420	435	450	465	480	495	510	525	540	555	570	585	600	615	630	645	660	675	690	705
1	T. fusca cutinase	1.54813	1.242	0.8908	0.7999	0.7511	0.7344	0.702	0.6908	0.6649	0.6639	0.6472	0.649	0.6333	0.6372	0.6246	0.6321	0.6194	0.6257	0.613	0.6193	0.6059	0.6119	0.598	0.6047	0.5918	0.5981	0.5852	0.5914	0.5784	0.5847	0.5719	0.5784	0.5658	0.5717	0.5595	0.5663	0.5538	0.5603	0.5481	0.5549	0.5424	0.5499	0.537	0.5445	0.5324	0.5393	0.5272	0.5341
1	T. fusca cutinase	1.54813	1.2802	0.9437	0.8407	0.7999	0.773	0.7524	0.7352	0.7179	0.706	0.6994	0.6892	0.6856	0.6768	0.6738	0.6653	0.6627	0.6544	0.6525	0.6441	0.6421	0.6341	0.6318	0.6248	0.6237	0.6159	0.6153	0.6076	0.6071	0.5998	0.5996	0.5921	0.5921	0.5848	0.585	0.5777	0.5783	0.5712	0.572	0.5654	0.5661	0.5593	0.5605	0.5539	0.5552	0.5486	0.5501	0.543
1	T. fusca cutinase	1.54813	1.2241	0.9057	0.8248	0.7847	0.7589	0.7394	0.7274	0.7206	0.7084	0.7025	0.6948	0.6893	0.6822	0.6786	0.672	0.6687	0.6626	0.6592	0.653	0.6496	0.6459	0.6451	0.6403	0.6377	0.6322	0.6299	0.6244	0.6225	0.6172	0.6152	0.6097	0.608	0.6027	0.601	0.596	0.5951	0.5901	0.589	0.5842	0.5828	0.5779	0.577	0.5723	0.5718	0.5671	0.5666	0.5615
2	I. sakiensis PETase	1.54813	0.8591	0.6766	0.6504	0.6007	0.5882	0.5702	0.5534	0.5403	0.5261	0.5168	0.5045	0.4967	0.4855	0.4797	0.4698	0.4643	0.4551	0.4509	0.4425	0.4386	0.4307	0.4273	0.4208	0.4186	0.4119	0.4109	0.4046	0.4039	0.398	0.3978	0.3921	0.3918	0.3868	0.387	0.3819	0.3829	0.3779	0.3792	0.375	0.3762	0.3719	0.3734	0.3692	0.371	0.3669	0.3687	0.3642
2	I. sakiensis PETase	1.54813	0.9268	0.7331	0.709	0.6344	0.6118	0.598	0.5867	0.5756	0.5617	0.5513	0.5407	0.5315	0.5204	0.5148	0.5034	0.4976	0.4886	0.4834	0.4749	0.4704	0.4627	0.4586	0.4525	0.4498	0.4432	0.4415	0.4352	0.4342	0.4284	0.4279	0.4222	0.4217	0.4168	0.4167	0.4119	0.4125	0.4076	0.4085	0.4046	0.4054	0.4013	0.4029	0.3987	0.4002	0.3961	0.3981	0.3935
2	I. sakiensis PETase	1.54813	0.9163	0.7275	0.6874	0.6226	0.6034	0.587	0.5748	0.5621	0.549	0.5384	0.5265	0.517	0.5074	0.4995	0.4903	0.4837	0.4754	0.4696	0.462	0.4567	0.4503	0.4454	0.44	0.4366	0.4313	0.4288	0.4238	0.4218	0.4171	0.4157	0.4113	0.4099	0.406	0.4052	0.4016	0.4014	0.3978	0.3977	0.395	0.3947	0.392	0.3923	0.3897	0.3898	0.3873	0.3878	0.3848
3	501	1.54813	1.38	1.1922	1.1353	1.0998	1.0794	1.0493	1.0331	1.0079	0.9963	0.9771	0.9702	0.9541	0.9502	0.9375	0.9361	0.9244	0.9247	0.9145	0.9151	0.9058	0.9077	0.8988	0.9018	0.8948	0.898	0.8913	0.8944	0.8876	0.8912	0.8853	0.8888	0.8828	0.886	0.8805	0.8843	0.8788	0.8821	0.8772	0.8809	0.8757	0.8798	0.8743	0.8781	0.8733	0.8766	0.8717	0.8744
3	501	1.54813	1.3598	1.1981	1.1625	1.1575	1.1086	1.1159	1.0751	1.0832	1.0407	1.0558	1.0164	1.0355	0.9975	1.0185	0.9819	1.004	0.9694	0.994	0.9593	0.9844	0.9521	0.9775	0.9457	0.9734	0.9404	0.9685	0.9362	0.9665	0.9336	0.9641	0.9298	0.9594	0.9293	0.959	0.9258	0.9572	0.9242	0.9557	0.9234	0.9548	0.9209	0.9545	0.92	0.9523	0.9197	0.9528	0.9179
3	702	1.54813	1.1799	0.8756	0.7766	0.7412	0.7092	0.6921	0.6853	0.6797	0.6719	0.6655	0.6577	0.6532	0.6463	0.6417	0.6353	0.6313	0.6247	0.6209	0.6144	0.6106	0.6047	0.6009	0.5959	0.5925	0.5872	0.5848	0.5794	0.577	0.5724	0.57	0.5649	0.563	0.5581	0.5564	0.5519	0.5503	0.5458	0.5445	0.5407	0.5391	0.5353	0.5344	0.5304	0.5295	0.5256	0.5247	0.5203
4	702	1.54813	1.2449	0.9121	0.8192	0.7752	0.7457	0.7099	0.6902	0.6801	0.6694	0.6627	0.6566	0.6488	0.6421	0.6374	0.6304	0.6252	0.6194	0.6141	0.6081	0.6031	0.5977	0.5924	0.5884	0.5841	0.5794	0.5758	0.5708	0.5675	0.5634	0.5602	0.556	0.5529	0.5489	0.546	0.5423	0.5399	0.536	0.5338	0.5308	0.5283	0.5253	0.5234	0.5203	0.5183	0.5152	0.5138	0.51
4	702	1.54813	1.2328	0.8955	0.7914	0.7462	0.7133	0.6868	0.6718	0.6615	0.6556	0.6466	0.6385	0.6313	0.6246	0.6184	0.6125	0.6064	0.6005	0.5953	0.5897	0.5841	0.5791	0.5732	0.5694	0.5649	0.5603	0.5564	0.5519	0.548	0.544	0.5405	0.5368	0.5332	0.5294	0.5263	0.5227	0.52	0.5167	0.514	0.5114	0.5086	0.5085	0.5096	0.5102	0.5102	0.5092	0.5088	0.5069
4	703	1.54813	1.236	0.898	0.7853	0.7488	0.7328	0.7227	0.7148	0.7073	0.7003	0.6917	0.6781	0.6683	0.6605	0.6533	0.6475	0.641	0.6359	0.6297	0.6247	0.6182	0.6137	0.6071	0.6037	0.5986	0.5948	0.59	0.5865	0.5822	0.5788	0.575	0.572	0.5681	0.5651	0.5616	0.559	0.5558	0.5533	0.5502	0.5484	0.5449	0.5431	0.5401	0.5385	0.5353	0.5337	0.5311	0.5292
5	703	1.54813	1.2333	0.8938	0.7915	0.7525	0.735	0.7255	0.7172	0.7104	0.7029	0.6966	0.6897	0.6795	0.6664	0.6581	0.6507	0.6452	0.6396	0.6347	0.6293	0.6247	0.6196	0.6146	0.6105	0.6063	0.6017	0.5982	0.5934	0.5902	0.586	0.5834	0.5791	0.5765	0.5727	0.5702	0.5667	0.565	0.5613	0.5596	0.5568	0.5548	0.5519	0.5506	0.5479	0.5464	0.5435	0.5423	0.5386
5	703	1.54813	1.2456	0.9127	0.8198	0.7826	0.7622	0.7535	0.7455	0.739	0.7314	0.7256	0.7179	0.7037	0.6924	0.6869	0.6793	0.6751	0.6696	0.6646	0.6587	0.6548	0.6489	0.6444	0.6397	0.6359	0.6307	0.6275	0.6223	0.6193	0.615	0.6125	0.6077	0.6053	0.601	0.5986	0.5947	0.5929	0.5891	0.5875	0.5844	0.5825	0.5793	0.5782	0.5747	0.5736	0.5702	0.5695	0.5656
5	705	1.54813	1.2131	1.1942	1.1373	1.1018	1.0814	1.0513	1.0351	1.0099	0.9983	0.9791	0.9722	0.9561	0.9522	0.9395	0.9381	0.9264	0.9267	0.9165	0.9171	0.9078	0.9097	0.9008	0.9038	0.8968	0.9	0.8933	0.8964	0.8896	0.8932	0.8873	0.8908	0.8848	0.888	0.8825	0.8863	0.8808	0.8841	0.8792	0.8829	0.8777	0.8818	0.8763	0.8801	0.8753	0.8786	0.8737	0.8764
6	705	1.54813	1.2168	1.1832	1.1263	1.0908	1.0704	1.0403	1.0241	0.9989	0.9873	0.9681	0.9612	0.9451	0.9412	0.9285	0.9271	0.9154	0.9157	0.9055	0.9061	0.8968	0.8987	0.8898	0.8928	0.8858	0.889	0.8823	0.8854	0.8786	0.8822	0.8763	0.8798	0.8738	0.877	0.8715	0.8753	0.8698	0.8731	0.8682	0.8719	0.8667	0.8708	0.8653	0.8691	0.8643	0.8676	0.8627	0.8654
6	705	1.54813	1.2214	1.1991	1.1635	1.1585	1.1096	1.1169	1.0761	1.0842	1.0417	1.0568	1.0174	1.0365	0.9985	1.0195	0.9829	1.005	0.9704	0.995	0.9603	0.9854	0.9531	0.9785	0.9467	0.9744	0.9414	0.9695	0.9372	0.9675	0.9346	0.9651	0.9308	0.9604	0.9303	0.96	0.9268	0.9582	0.9252	0.9567	0.9244	0.9558	0.9219	0.9555	0.921	0.9533	0.9207	0.9538	0.9189
6	707	1.54813	1.2399	1.1053	1.0809	1.0747	1.0688	1.0613	1.0546	1.0462	1.0388	1.033	1.029	1.0193	1.008	0.9969	0.9896	0.9855	0.9831	0.9808	0.9782	0.9766	0.9756	0.9745	0.9753	0.9755	0.9762	0.9772	0.9778	0.9785	0.9792	0.9798	0.9802	0.9808	0.9808	0.9813	0.9812	0.9817	0.9815	0.9815	0.9815	0.9817	0.9819	0.9817	0.9814	0.9811	0.9808	0.9805	0.9794
7	707	1.54813	1.3167	1.1655	1.1354	1.125	1.1178	1.1108	1.1021	1.0938	1.0858	1.0794	1.0725	1.0665	1.0604	1.0549	1.0494	1.0417	1.0326	1.0274	1.0252	1.0224	1.0209	1.0193	1.0212	1.0214	1.0225	1.0239	1.0248	1.0264	1.0272	1.0283	1.0289	1.0299	1.03	1.031	1.0308	1.0315	1.0316	1.0324	1.0321	1.032	1.0324	1.0321	1.0326	1.0322	1.0319	1.0314	1.0312
7	707	1.54813	1.22	1.0292	1.014	1.0186	1.0224	1.021	1.0148	1.007	0.9988	0.9927	0.9869	0.9803	0.9747	0.9719	0.9707	0.9721	0.9716	0.9705	0.9712	0.9703	0.9705	0.9721	0.9737	0.9743	0.9769	0.9783	0.9805	0.9822	0.984	0.9853	0.9873	0.9886	0.9904	0.991	0.992	0.994	0.9954	0.9965	0.9981	0.999	1.0003	1.001	1.0013	1.0026	1.0034	1.0045	1.0033
7	708	1.54813	1.2109	1.0912	1.0392	1.0174	1.0013	0.9694	0.9565	0.9324	0.9127	0.8977	0.8868	0.8788	0.8722	0.8656	0.8592	0.853	0.8473	0.841	0.8361	0.8296	0.8242	0.8183	0.8139	0.8088	0.8043	0.7995	0.795	0.7907	0.7861	0.7822	0.7778	0.774	0.7695	0.7659	0.7619	0.7583	0.7545	0.7516	0.7485	0.7449	0.7417	0.7382	0.7354	0.7323	0.7294	0.7266	0.7233
8	708	1.54813	2.6684	2.4407	2.4675	2.4698	2.2524	2.4759	2.2202	2.2178	2.2035	2.1934	2.1888	2.1777	2.1721	2.1717	2.1522	2.1534	2.1287	2.1139	2.0908	2.0815	2.0652	2.0706	2.0438	2.0454	2.0353	2.0179	2.0193	2.0064	2.0026	1.9817	1.9786	1.9585	1.9618	1.9583	1.9413	1.9273	1.9194	1.907	1.9013	1.9034	1.884	1.8804	1.8605	1.8712	1.8607	1.8547	1.8406
8	708	1.54813	1.2195	1.0988	1.0527	1.0348	1.0143	0.975	0.9608	0.9434	0.9214	0.91	0.9025	0.8937	0.8873	0.882	0.8745	0.8684	0.8638	0.8569	0.8488	0.8414	0.8343	0.827	0.8225	0.8172	0.812	0.808	0.8032	0.7996	0.7962	0.7928	0.7891	0.7861	0.7824	0.7796	0.7768	0.7737	0.7708	0.768	0.7658	0.7629	0.7605	0.7578	0.7553	0.7526	0.7498	0.7481	0.7444
8	715	1.54813	1.8287	1.4106	1.3105	1.3009	1.2835	1.2788	1.2733	1.2644	1.2536	1.2566	1.2448	1.2446	1.2313	1.2218	1.2284	1.2199	1.1943	1.1782	1.1847	1.1691	1.1701	1.1571	1.1603	1.1479	1.1431	1.1377	1.1348	1.1287	1.117	1.1183	1.1089	1.1039	1.0937	1.1588	1.1572	1.1536	1.1454	1.1452	1.1413	1.1309	1.1292	1.1225	1.1215	1.1153	1.1106	1.105	1.1103
9	715	1.54813	1.3339	0.9848	0.8913	0.8508	0.8322	0.821	0.8136	0.8052	0.797	0.7901	0.7831	0.7765	0.7696	0.7588	0.752	0.7446	0.7379	0.7315	0.7262	0.7204	0.7156	0.7095	0.7059	0.7004	0.6963	0.6914	0.6871	0.6829	0.6783	0.675	0.6709	0.6671	0.6634	0.6601	0.6567	0.6537	0.6503	0.6476	0.645	0.642	0.6395	0.6368	0.6347	0.6321	0.6298	0.6278	0.6248
9	715	1.54813	1.2858	0.9274	0.8361	0.8013	0.7862	0.7763	0.7687	0.7609	0.7536	0.7472	0.7408	0.7346	0.7285	0.7165	0.7069	0.7039	0.7002	0.6948	0.6903	0.6862	0.6818	0.6772	0.6741	0.6703	0.6661	0.6622	0.6583	0.6543	0.6504	0.6471	0.6428	0.6394	0.6355	0.6319	0.628	0.6252	0.6215	0.6186	0.616	0.6129	0.6102	0.6076	0.6049	0.6026	0.5999	0.5976	0.5943
9	Geobacillus stearothermophilis esterase	1.54813	0.8628	0.7733	0.6397	0.523	0.4964	0.4794	0.4574	0.4396	0.427	0.4165	0.408	0.4002	0.3887	0.3835	0.3791	0.3747	0.371	0.3677	0.3645	0.3608	0.3588	0.355	0.3535	0.3511	0.3492	0.3478	0.3456	0.344	0.3419	0.3408	0.339	0.3377	0.3327	0.3317	0.3298	0.3291	0.3275	0.3267	0.3255	0.3247	0.3235	0.3229	0.3219	0.3208	0.32	0.3194	0.318
10	Geobacillus stearothermophilis esterase	1.54813	0.9309	0.6597	0.5266	0.4694	0.394	0.3642	0.3421	0.3211	0.3058	0.2942	0.2841	0.2764	0.2696	0.2636	0.2583	0.2538	0.2508	0.2477	0.2449	0.2413	0.239	0.236	0.2344	0.2321	0.2304	0.2284	0.2262	0.2245	0.2228	0.2207	0.2187	0.217	0.2155	0.2138	0.2121	0.2108	0.2088	0.2074	0.206	0.2046	0.2033	0.2015	0.2009	0.2005	0.1983	0.1979	0.1962
10	Geobacillus stearothermophilis esterase	1.54813	0.8828	0.6215	0.4942	0.4299	0.3689	0.3445	0.3224	0.3052	0.2904	0.2808	0.2722	0.2643	0.2576	0.2571	0.2579	0.2567	0.2532	0.2477	0.2432	0.2393	0.2352	0.2306	0.2283	0.2252	0.2221	0.2193	0.2172	0.214	0.2117	0.2096	0.2074	0.2051	0.2031	0.2008	0.1991	0.1973	0.1956	0.1941	0.1932	0.1913	0.1902	0.1892	0.188	0.1868	0.1855	0.185	0.1829
10	Bacillus subilis esterase	1.54813	0.9434	0.6826	0.6106	0.5892	0.5812	0.5776	0.5741	0.5695	0.5656	0.5609	0.5586	0.5543	0.55	0.5463	0.5397	0.5332	0.5261	0.5216	0.5189	0.5155	0.5156	0.5135	0.5131	0.5111	0.5106	0.5094	0.5071	0.5084	0.5064	0.5064	0.5044	0.5046	0.5032	0.5029	0.5016	0.5017	0.5004	0.5005	0.4994	0.4998	0.4996	0.4983	0.4984	0.4984	0.4972	0.4971	0.4963
11	Bacillus subilis esterase	1.54813	0.9926	0.7456	0.6578	0.6311	0.6229	0.6217	0.6175	0.6143	0.6097	0.6075	0.6033	0.6011	0.5981	0.5962	0.5927	0.5905	0.5864	0.5792	0.5721	0.5659	0.5635	0.5581	0.5574	0.5543	0.5523	0.5507	0.547	0.5473	0.544	0.5445	0.5413	0.5415	0.5397	0.5401	0.5378	0.5389	0.5358	0.5386	0.5371	0.5365	0.5366	0.5361	0.5364	0.5363	0.5358	0.5358	0.5341
11	Bacillus subilis esterase	1.54813	0.9884	0.8216	0.7546	0.7337	0.7225	0.7164	0.7131	0.7084	0.7046	0.7004	0.6981	0.6947	0.6921	0.6905	0.6873	0.684	0.6769	0.6684	0.6645	0.6619	0.661	0.6589	0.6582	0.6573	0.6567	0.6556	0.6539	0.654	0.6516	0.6514	0.6492	0.6491	0.6478	0.6478	0.6462	0.6462	0.6455	0.6461	0.6454	0.6457	0.6447	0.6449	0.6452	0.6446	0.6449	0.6445	0.6434
11	Aspergilis oryzae lipase	1.54813	1.3887	1.1969	1.1894	1.1919	1.1883	1.1826	1.1785	1.1719	1.1651	1.1597	1.1532	1.1475	1.1408	1.136	1.1292	1.1237	1.1185	1.1114	1.1058	1.0986	1.0943	1.0849	1.0776	1.0665	1.0568	1.0463	1.0385	1.0312	1.0229	1.0165	1.0098	1.003	0.996	0.9901	0.9827	0.9765	0.9704	0.965	0.9592	0.9534	0.9244	0.9201	0.9167	0.9128	0.9086	0.9055	0.9014
12	Aspergilis oryzae lipase	1.54813	1.301	1.1804	1.1534	1.1457	1.1443	1.143	1.1412	1.1366	1.1353	1.1327	1.1304	1.1293	1.1268	1.1264	1.1254	1.1233	1.1202	1.1191	1.1168	1.1147	1.1133	1.1111	1.1098	1.1069	1.1016	1.0974	1.0914	1.0858	1.0811	1.0777	1.0737	1.0709	1.0676	1.0651	1.0624	1.0603	1.0576	1.0558	1.0545	1.0518	1.0499	1.0479	1.0464	1.0445	1.0424	1.0407	1.0381
12	Aspergilis oryzae lipase	1.54813	1.2271	1.1214	1.0962	1.0901	1.0866	1.0843	1.0815	1.0807	1.0784	1.0783	1.0757	1.0764	1.0726	1.073	1.072	1.0687	1.07	1.0684	1.0677	1.0667	1.066	1.0597	1.0581	1.0535	1.0463	1.0418	1.0363	1.0325	1.0287	1.0262	1.0232	1.0206	1.0177	1.0155	1.0128	1.0111	1.0087	1.0069	1.005	1.0028	1.0007	0.9991	0.9971	0.9954	0.9932	0.9916	0.9889
12	Candita antarctica lipase A	1.54813	1.2236	1.1083	1.0805	1.0739	1.0711	1.0671	1.0577	1.0484	1.0385	1.0329	1.0248	1.0232	1.0217	1.021	1.0227	1.0203	1.0205	1.0192	1.0188	1.0193	1.0198	1.018	1.0198	1.0193	1.0192	1.0191	1.0194	1.0186	1.0186	1.0188	1.0188	1.0187	1.0182	1.0177	1.018	1.0179	1.0171	1.0173	1.0162	1.0162	1.0154	1.0159	1.0148	1.0144	1.0135	1.0125	1.0109
13	Candita antarctica lipase A	1.54813	1.234	1.1147	1.0886	1.0812	1.0764	1.0735	1.0714	1.0709	1.0672	1.0646	1.0641	1.0652	1.0612	1.0628	1.0585	1.0571	1.0608	1.0542	1.0532	1.0521	1.0517	1.0489	1.0492	1.0467	1.0444	1.0431	1.0422	1.0411	1.0398	1.0402	1.0384	1.0371	1.0369	1.0354	1.0339	1.0335	1.0322	1.0305	1.0301	1.0285	1.0274	1.0266	1.0249	1.0244	1.0227	1.022	1.0197
13	Candita antarctica lipase A	1.54813	1.222	1.1055	1.0765	1.0689	1.0652	1.0636	1.0619	1.0597	1.0586	1.058	1.0564	1.0559	1.0544	1.0542	1.0518	1.0518	1.0509	1.0486	1.048	1.0465	1.0454	1.0436	1.0434	1.0425	1.0411	1.0403	1.0394	1.0382	1.0374	1.0366	1.0353	1.0345	1.0333	1.032	1.0307	1.0301	1.0286	1.0277	1.0271	1.0257	1.0246	1.0239	1.0225	1.0214	1.0197	1.0186	1.0164
13	Candita antarctica lipase B	1.54813	1.1356	0.8245	0.7164	0.6703	0.6516	0.6429	0.6388	0.6361	0.6332	0.6326	0.6317	0.6307	0.6291	0.6284	0.6286	0.628	0.6266	0.6262	0.6256	0.6244	0.6239	0.6222	0.6221	0.6211	0.6204	0.6198	0.6188	0.6182	0.6174	0.6172	0.6162	0.6154	0.6145	0.6136	0.6128	0.6125	0.6115	0.6107	0.6103	0.6095	0.6089	0.6081	0.6076	0.6067	0.6054	0.6052	0.6036
14	Candita antarctica lipase B	1.54813	1.1244	0.8192	0.7096	0.6653	0.6468	0.6387	0.6347	0.6326	0.6309	0.6303	0.6296	0.6288	0.6284	0.6282	0.6277	0.6274	0.6268	0.6261	0.6252	0.6235	0.623	0.6208	0.6207	0.62	0.619	0.6183	0.6172	0.6166	0.6151	0.6145	0.6132	0.6123	0.6114	0.6109	0.6098	0.6096	0.6083	0.6083	0.6078	0.6072	0.6064	0.6057	0.6051	0.6049	0.604	0.6039	0.6021
14	Candita antarctica lipase B	1.54813	1.1519	0.84	0.729	0.6814	0.6604	0.6508	0.6459	0.6432	0.6406	0.6402	0.6386	0.6378	0.637	0.6366	0.6359	0.6349	0.6344	0.6334	0.6331	0.6321	0.6314	0.6297	0.6298	0.6291	0.6287	0.6283	0.6276	0.6271	0.6269	0.6265	0.6261	0.6256	0.6252	0.6245	0.6241	0.6241	0.6232	0.6233	0.6232	0.6227	0.6222	0.6221	0.6216	0.6214	0.6208	0.6208	0.6194
14	Rhizopus oryzae esterase	1.54813	0.3863	0.3771	0.359	0.3504	0.3421	0.3354	0.3295	0.3231	0.3169	0.3114	0.3058	0.3008	0.2923	0.2879	0.2836	0.2791	0.2755	0.2712	0.2674	0.2632	0.2595	0.2547	0.252	0.2487	0.2453	0.2422	0.2389	0.2357	0.2327	0.2299	0.227	0.224	0.2211	0.2184	0.2158	0.2134	0.2106	0.2082	0.2061	0.2038	0.2014	0.1992	0.1969	0.195	0.1926	0.1907	0.1879
15	Rhizopus oryzae esterase	1.54813	0.4142	0.3576	0.3355	0.3254	0.3192	0.3132	0.3078	0.302	0.296	0.2913	0.2862	0.2814	0.2777	0.2733	0.2695	0.2647	0.2611	0.257	0.2532	0.2494	0.2458	0.2414	0.2388	0.2355	0.2323	0.2293	0.2265	0.2234	0.2207	0.2183	0.2154	0.2124	0.2097	0.2073	0.2048	0.2026	0.2002	0.1977	0.196	0.1934	0.1913	0.1893	0.1872	0.1852	0.183	0.1812	0.1787
15	Rhizopus oryzae esterase	1.54813	0.4188	0.4451	0.4192	0.4141	0.407	0.3953	0.3909	0.3649	0.3639	0.3583	0.3562	0.3514	0.3479	0.3439	0.3397	0.3354	0.3337	0.328	0.3261	0.3224	0.3195	0.314	0.3111	0.3096	0.3057	0.3049	0.3022	0.2993	0.2984	0.2943	0.2939	0.2882	0.2886	0.2843	0.2834	0.2813	0.281	0.2782	0.279	0.2753	0.275	0.2717	0.2706	0.2694	0.2694	0.2652	0.2689
15	Aspergilis oryzae phospholipase	1.54813	1.3032	1.2786	1.2799	1.2846	1.2766	1.2424	1.2221	1.2233	1.2216	1.2179	1.2159	1.2132	1.2117	1.2092	1.2074	1.206	1.2021	1.2021	1.1991	1.197	1.1945	1.1916	1.1894	1.1888	1.1857	1.1844	1.1801	1.179	1.1779	1.1751	1.1745	1.1705	1.1677	1.1667	1.1647	1.162	1.16	1.1568	1.1544	1.1533	1.1509	1.1483	1.1463	1.1445	1.1423	1.1392	1.1373
16	Aspergilis oryzae phospholipase	1.54813	1.3187	1.3421	1.292	1.3114	1.3019	1.2667	1.2343	1.2324	1.2326	1.2284	1.2254	1.2253	1.2229	1.2218	1.2194	1.2193	1.2158	1.2142	1.2114	1.2098	1.2071	1.2046	1.2027	1.2011	1.198	1.1976	1.1944	1.1932	1.1903	1.188	1.1859	1.184	1.1821	1.179	1.1763	1.1743	1.1721	1.171	1.1678	1.1665	1.1642	1.1621	1.16	1.1581	1.1554	1.1535	1.1501
16	Aspergilis oryzae phospholipase	1.54813	1.3342	1.2827	1.2501	1.277	1.2663	1.2515	1.2139	1.2106	1.2108	1.2063	1.2039	1.2026	1.1996	1.1982	1.1957	1.1946	1.1925	1.1894	1.1875	1.1851	1.183	1.1794	1.1787	1.1759	1.1739	1.1726	1.1684	1.1677	1.1649	1.1627	1.1602	1.1586	1.1556	1.154	1.1506	1.1505	1.1464	1.1459	1.1429	1.1415	1.1396	1.1373	1.1356	1.1331	1.131	1.129	1.1258
16	Pseudomonas sp. lipoprotein lipase	1.54813	1.1423	0.7606	0.7392	0.7151	0.6944	0.695	0.6912	0.688	0.6794	0.6738	0.6641	0.6563	0.6487	0.6424	0.6355	0.6288	0.6228	0.6168	0.6113	0.6061	0.6012	0.5963	0.5928	0.5891	0.5854	0.5822	0.5796	0.5761	0.5735	0.5713	0.5685	0.5664	0.5646	0.5624	0.5603	0.5594	0.5586	0.5581	0.5574	0.5562	0.5542	0.5538	0.5526	0.5511	0.5499	0.5495	0.5479
17	Pseudomonas sp. lipoprotein lipase	1.54813	1.0797	0.7145	0.7133	0.7015	0.6949	0.6885	0.6922	0.688	0.6811	0.6747	0.6675	0.6612	0.6547	0.6486	0.6429	0.6372	0.6329	0.6261	0.6216	0.617	0.6128	0.6079	0.6052	0.6014	0.5986	0.5959	0.5929	0.5905	0.5885	0.5862	0.5845	0.5822	0.5805	0.5791	0.5782	0.5766	0.5752	0.5743	0.574	0.5726	0.5726	0.5714	0.5711	0.5706	0.5703	0.5697	0.5688
17	Pseudomonas sp. lipoprotein lipase	1.54813	1.0885	0.7027	0.687	0.6692	0.6571	0.6481	0.649	0.6398	0.6304	0.6219	0.6137	0.6048	0.5973	0.5908	0.5837	0.5775	0.5716	0.5659	0.5606	0.5572	0.5557	0.5507	0.5473	0.5437	0.5396	0.5366	0.5328	0.5304	0.5274	0.5252	0.5229	0.5207	0.5186	0.5166	0.5146	0.5136	0.5117	0.5104	0.5094	0.5083	0.5075	0.5064	0.5056	0.505	0.5038	0.5034	0.5023
17	Bovine pancreas phospholipase	1.54813	1.2515	1.1111	1.0866	1.0851	1.079	1.0752	1.0722	1.0683	1.0596	1.0469	1.0382	1.0298	1.0238	1.0155	1.0103	1.0071	1.0042	1.0016	0.9991	0.9972	0.9947	0.9917	0.9909	0.9889	0.9872	0.9858	0.9833	0.982	0.981	0.9791	0.9773	0.9756	0.9754	0.9723	0.9706	0.9697	0.9679	0.9667	0.9665	0.965	0.9636	0.9615	0.9605	0.9595	0.9574	0.9573	0.955
18	Bovine pancreas phospholipase	1.54813	1.3287	1.1744	1.1274	1.1179	1.1113	1.1042	1.0995	1.0954	1.0893	1.0836	1.067	1.0545	1.0514	1.0439	1.0368	1.0298	1.0244	1.0198	1.0164	1.0129	1.0104	1.0081	1.0051	1.0026	1.0008	0.9989	0.9975	0.9949	0.9935	0.9912	0.9902	0.9884	0.9863	0.9851	0.9829	0.9815	0.9798	0.9788	0.9776	0.9762	0.975	0.9732	0.9723	0.9707	0.9692	0.9679	0.9661
18	Bovine pancreas phospholipase	1.54813	1.3547	1.2097	1.1541	1.1418	1.1341	1.1319	1.1256	1.1224	1.1141	1.101	1.0878	1.0791	1.0703	1.0669	1.0603	1.0551	1.052	1.048	1.0453	1.0419	1.0387	1.0353	1.0333	1.0318	1.0293	1.0274	1.025	1.0235	1.0219	1.0199	1.018	1.0162	1.0145	1.0125	1.0107	1.0096	1.0075	1.0061	1.0047	1.0032	1.0011	1.0009	0.9987	0.9975	0.9954	0.9946	0.9921
18	lysate	1.54813	1.1897	1.0506	1.0236	1.0153	1.0106	1.0068	1.0031	0.9993	0.9952	0.9921	0.9887	0.9853	0.9824	0.9795	0.9764	0.973	0.9698	0.9664	0.9632	0.9597	0.9567	0.9526	0.9504	0.9471	0.944	0.941	0.9379	0.9348	0.932	0.9293	0.9263	0.9236	0.9211	0.919	0.9168	0.915	0.9129	0.9113	0.9095	0.9076	0.9057	0.9041	0.9024	0.9008	0.8988	0.8974	0.8949
	lysate	1.54813	1.2665	1.1709	1.1413	1.1291	1.1241	1.1201	1.116	1.1114	1.1069	1.0878	1.0837	1.08	1.0763	1.0732	1.0695	1.0657	1.0622	1.0586	1.0548	1.0509	1.0477	1.0431	1.0406	1.0371	1.0339	1.0305	1.027	1.0238	1.0203	1.0176	1.014	1.0105	1.0072	1.0042	1.0006	0.9978	0.9942	0.9915	0.9886	0.9855	0.983	0.9804	0.9785	0.9765	0.9747	0.973	0.9705
	lysate	1.54813	1.262	1.1713	1.1388	1.1263	1.1195	1.1129	1.1077	1.1028	1.0947	1.0851	1.0765	1.0693	1.0642	1.0584	1.054	1.0488	1.0452	1.041	1.0378	1.0344	1.0311	1.0275	1.0254	1.0227	1.0198	1.0172	1.015	1.0114	1.0094	1.0066	1.0043	1.0014	0.9991	0.9963	0.9947	0.9923	0.9903	0.9881	0.9874	0.9857	0.9844	0.983	0.9814	0.98	0.9785	0.9773	0.9749
	MasterMix+BHET (G04)	1.54813	1.3615	1.2203	1.2417	1.2403	1.2308	1.1892	1.1843	1.1854	1.1792	1.1756	1.172	1.1711	1.1685	1.1677	1.1663	1.1654	1.164	1.1626	1.1615	1.1599	1.1585	1.1568	1.1567	1.1552	1.1532	1.1518	1.1494	1.1483	1.1465	1.1448	1.1428	1.1409	1.1388	1.1373	1.1349	1.1342	1.1324	1.1314	1.1294	1.1286	1.1268	1.1261	1.1247	1.1239	1.1219	1.1214	1.1191
	MasterMix+BHET (G05)	1.54813	1.3516	1.2404	1.252	1.2471	1.235	1.197	1.1835	1.1875	1.1771	1.18	1.1764	1.1741	1.1736	1.1728	1.1713	1.1714	1.1706	1.1703	1.1684	1.1678	1.1661	1.1644	1.1638	1.1631	1.1621	1.1614	1.1599	1.1584	1.1549	1.1515	1.1472	1.1439	1.1399	1.1371	1.1337	1.1317	1.1288	1.1263	1.1241	1.1224	1.121	1.1196	1.1185	1.1172	1.1153	1.1142	1.1124
	MasterMix+BHET (G06)	1.54813	1.3313	1.2148	1.1853	1.1789	1.1732	1.1428	1.1346	1.1282	1.1216	1.1187	1.1148	1.1127	1.1114	1.1098	1.1087	1.1074	1.1052	1.104	1.1027	1.1006	1.0994	1.0976	1.0967	1.0959	1.0944	1.0936	1.092	1.0912	1.0901	1.0897	1.088	1.0869	1.0855	1.0846	1.0835	1.0826	1.0816	1.0805	1.0796	1.0787	1.0776	1.077	1.0762	1.0752	1.0739	1.073	1.0717
	MaserMix No BHET	1.32421	1.336	1.1869	1.1726	1.17	1.1389	1.102	1.1037	1.1006	1.0934	1.0922	1.0903	1.0905	1.0885	1.0881	1.087	1.0866	1.0865	1.0853	1.0845	1.083	1.0821	1.08	1.0806	1.0798	1.0786	1.0786	1.077	1.077	1.0765	1.0759	1.0748	1.0743	1.0733	1.0724	1.0714	1.0709	1.0702	1.0697	1.0693	1.069	1.0683	1.068	1.0674	1.0671	1.0662	1.0662	1.0649
	MaserMix No BHET	1.37179	1.3993	1.1896	1.1687	1.1623	1.1499	1.1224	1.1118	1.1052	1.0953	1.0915	1.0876	1.0859	1.0854	1.0839	1.0832	1.0826	1.0813	1.0802	1.0793	1.0785	1.0763	1.0745	1.0742	1.0732	1.0723	1.0723	1.0709	1.0704	1.0698	1.0692	1.0681	1.0672	1.0663	1.0651	1.0641	1.064	1.0628	1.0621	1.0618	1.0609	1.0606	1.0599	1.0597	1.0594	1.058	1.0578	1.0572
	MaserMix No BHET	1.34008	1.3664	1.1845	1.1764	1.1709	1.1587	1.1253	1.1143	1.1089	1.1044	1.1024	1.1	1.0986	1.0966	1.0962	1.0943	1.0942	1.0935	1.0909	1.0847	1.0779	1.0715	1.0647	1.0612	1.057	1.0531	1.0506	1.0483	1.0462	1.045	1.0443	1.0431	1.0425	1.0419	1.0412	1.0405	1.0404	1.0397	1.0396	1.0392	1.0389	1.0385	1.0385	1.038	1.0375	1.037	1.037	1.0354
Trial 2
	avg. time [s]	0	899.99	1799.99	2699.99	3599.99	4499.99	5399.99	6299.99	7199.99	8099.99	8999.99	9899.99	10800	11700	12600	13500	14400	15300	16200	17100	18000	18900	19800	20700	21600	22500	23400	24300	25200	26100	27000	27900	28800	29700	30600	31500	32400	33300	34200	35100	36000	36900	37800	38700	39600	40500	41400	42300
	Time (min)	0	14.9998	29.9998	44.9998	59.9998	74.9998	89.9998	105	120	135	150	165	180	195	210	225	240	255	270	285	300	315	330	345	360	375	390	405	420	435	450	465	480	495	510	525	540	555	570	585	600	615	630	645	660	675	690	705
1	T. fusca cutinase	1.2497	1.0587	0.8142	0.7445	0.6919	0.6804	0.6659	0.6612	0.6491	0.6474	0.6358	0.6342	0.6244	0.6235	0.6119	0.6103	0.5983	0.5956	0.583	0.5817	0.5696	0.5696	0.5584	0.5595	0.5487	0.551	0.5391	0.5408	0.531	0.5329	0.523	0.5248	0.5149	0.5176	0.5082	0.5104	0.5006	0.5051	0.4946	0.4981	0.4888	0.4948	0.4834	0.4874	0.4777	0.4819	0.4722	0.4772
1	T. fusca cutinase	1.2497	1.1079	0.825	0.7647	0.7326	0.7188	0.7123	0.7079	0.6955	0.6931	0.6842	0.6823	0.672	0.6704	0.6537	0.6535	0.6427	0.642	0.6311	0.6313	0.6196	0.6205	0.6104	0.6104	0.6031	0.6012	0.5929	0.5949	0.5855	0.5867	0.5777	0.5793	0.57	0.5725	0.5639	0.5656	0.557	0.5596	0.5505	0.5534	0.5453	0.5472	0.5401	0.5426	0.5346	0.5378	0.53	0.5336
1	T. fusca cutinase	1.2497	1.0976	0.8464	0.7619	0.7192	0.7082	0.6891	0.6887	0.6739	0.6746	0.6596	0.6612	0.6476	0.6483	0.6329	0.6319	0.6172	0.6169	0.6037	0.6054	0.5915	0.5941	0.581	0.5839	0.572	0.5751	0.5621	0.5654	0.5541	0.5572	0.546	0.5488	0.5376	0.5416	0.5309	0.534	0.5238	0.5284	0.5171	0.5217	0.5113	0.5171	0.5059	0.5102	0.5	0.5045	0.4946	0.4999
2	I. sakiensis PETase	1.2497	0.7626	0.6711	0.6402	0.6092	0.5806	0.5469	0.5353	0.515	0.5064	0.4883	0.4824	0.4667	0.4627	0.4478	0.4453	0.4322	0.4304	0.4182	0.4173	0.4065	0.4063	0.396	0.3972	0.3878	0.3896	0.38	0.3821	0.3739	0.3765	0.3686	0.3709	0.3638	0.3669	0.36	0.3629	0.3562	0.3603	0.3533	0.3572	0.3508	0.3561	0.3492	0.3529	0.3468	0.3508	0.3452	0.3498
2	I. sakiensis PETase	1.2497	0.7649	0.6699	0.6392	0.6112	0.578	0.5534	0.5334	0.5168	0.5019	0.4891	0.4769	0.4674	0.4569	0.4487	0.44	0.4333	0.4253	0.4196	0.4129	0.4085	0.4025	0.3986	0.3935	0.3907	0.386	0.3835	0.379	0.3775	0.3734	0.3723	0.3685	0.3677	0.3646	0.3642	0.3609	0.361	0.3583	0.3582	0.3556	0.3559	0.3535	0.3543	0.3513	0.3522	0.3497	0.3507	0.3487
2	I. sakiensis PETase	1.2497	0.7732	0.6784	0.647	0.6194	0.5872	0.5577	0.5405	0.5208	0.5088	0.4929	0.4834	0.4706	0.4636	0.4517	0.4461	0.4358	0.4311	0.4219	0.4187	0.4098	0.4075	0.3999	0.3986	0.3917	0.391	0.384	0.3837	0.378	0.3782	0.3726	0.3728	0.3682	0.369	0.3643	0.3649	0.3608	0.3623	0.3577	0.3596	0.3557	0.3578	0.3539	0.3553	0.3515	0.3535	0.3503	0.3523
3	501	1.2497	1.2653	1.21	1.1489	1.1328	1.1021	1.087	1.0625	1.0529	1.0291	1.024	1.0038	1.0007	0.9816	0.98	0.9623	0.9627	0.9459	0.9467	0.9301	0.934	0.9185	0.9232	0.908	0.9138	0.8982	0.9056	0.8911	0.8988	0.8831	0.8923	0.878	0.8874	0.873	0.8825	0.8685	0.8786	0.8811	0.899	0.8978	0.8965	0.8944	0.8936	0.8913	0.8901	0.8884	0.8875	0.8869
3	501	1.2497	1.1939	1.1609	1.1526	1.1012	1.0997	1.0576	1.0667	1.0312	1.0401	1.0044	1.0166	0.9845	0.9989	0.9666	0.9831	0.9526	0.9691	0.9388	0.9571	0.9274	0.9458	0.9171	0.9371	0.9093	0.9305	0.9014	0.9222	0.8955	0.9177	0.8901	0.9115	0.8849	0.9072	0.8809	0.9027	0.8762	0.901	0.873	0.8968	0.8707	0.8975	0.8683	0.893	0.8658	0.8904	0.8634	0.889
3	501	1.2497	1.2332	1.1728	1.1297	1.0804	1.0788	1.0428	1.0477	1.0159	1.0195	0.9877	0.9954	0.9657	0.9753	0.9459	0.9573	0.9303	0.9421	0.9157	0.9291	0.9031	0.9171	0.8925	0.9075	0.8838	0.9001	0.8754	0.8915	0.8686	0.8863	0.863	0.8799	0.8575	0.8756	0.8535	0.8703	0.8487	0.8684	0.8447	0.8641	0.8423	0.864	0.8399	0.8592	0.8369	0.8566	0.8343	0.8546
4	702	1.2497	1.0728	0.8192	0.7292	0.6886	0.6684	0.6546	0.6433	0.6283	0.6164	0.6033	0.5927	0.5845	0.5779	0.5707	0.565	0.5588	0.5534	0.5471	0.5424	0.5371	0.5321	0.5273	0.5232	0.5182	0.5145	0.5098	0.5056	0.5015	0.498	0.4938	0.4902	0.4862	0.483	0.4793	0.4761	0.4724	0.4696	0.4661	0.4634	0.4601	0.4588	0.4557	0.4529	0.4501	0.4476	0.4448	0.4429
4	702	1.2497	1.0614	0.8005	0.7126	0.6739	0.6542	0.6439	0.6325	0.6157	0.6064	0.596	0.5872	0.5799	0.5732	0.5656	0.56	0.554	0.5485	0.5426	0.5377	0.5324	0.5278	0.5225	0.5188	0.5139	0.51	0.5052	0.5018	0.4975	0.4939	0.49	0.4865	0.4826	0.4796	0.4758	0.4728	0.4694	0.4667	0.4632	0.4608	0.4574	0.4549	0.4521	0.4494	0.4466	0.4441	0.4414	0.4395
4	702	1.2497	1.0758	0.8123	0.7221	0.6847	0.6644	0.6521	0.6394	0.6261	0.6156	0.6029	0.5917	0.5849	0.5775	0.5707	0.5649	0.5592	0.5529	0.5477	0.5422	0.5369	0.532	0.5273	0.5226	0.5182	0.514	0.5095	0.5052	0.5018	0.4974	0.494	0.4899	0.4865	0.4831	0.4796	0.4759	0.4728	0.4696	0.4664	0.4634	0.4607	0.4575	0.4555	0.452	0.4493	0.4466	0.4442	0.4419
5	703	1.2497	1.074	0.7982	0.7068	0.6703	0.6628	0.645	0.6377	0.6268	0.6197	0.6125	0.6062	0.5991	0.5953	0.587	0.5821	0.5764	0.5715	0.5663	0.5615	0.5564	0.552	0.5474	0.5449	0.5393	0.5355	0.531	0.5274	0.5238	0.5202	0.5163	0.5127	0.509	0.5055	0.5016	0.4979	0.4941	0.4907	0.4865	0.4835	0.4797	0.4766	0.474	0.4721	0.4702	0.4695	0.4676	0.467
5	703	1.2497	1.0967	0.8267	0.7452	0.7108	0.6934	0.6816	0.673	0.6621	0.6557	0.648	0.6419	0.6349	0.6299	0.6229	0.6186	0.6123	0.6079	0.6014	0.5976	0.5915	0.5879	0.5823	0.5791	0.574	0.5712	0.5656	0.5628	0.5581	0.5551	0.5504	0.5477	0.5425	0.54	0.5344	0.5311	0.5262	0.5251	0.521	0.5209	0.5178	0.5175	0.5143	0.5137	0.5103	0.5095	0.5062	0.5063
5	703	1.2497	1.046	0.7895	0.7266	0.6993	0.6966	0.6856	0.6716	0.6679	0.6569	0.6498	0.6438	0.6395	0.6339	0.6283	0.6202	0.619	0.6106	0.6075	0.6009	0.5977	0.5926	0.589	0.5841	0.581	0.5761	0.5737	0.5683	0.5664	0.5609	0.5593	0.5538	0.5517	0.546	0.544	0.5389	0.5375	0.5336	0.5333	0.5301	0.5297	0.5262	0.5272	0.5233	0.5235	0.5204	0.5207	0.5174
6	705	1.2497	1.0965	0.9858	0.9458	0.9266	0.9162	0.9031	0.8884	0.8719	0.8575	0.8415	0.8322	0.8238	0.8171	0.8084	0.8026	0.7955	0.7896	0.7827	0.7779	0.7709	0.7666	0.7604	0.7566	0.7508	0.7468	0.7411	0.7376	0.7328	0.7289	0.7241	0.7204	0.7159	0.7133	0.7086	0.7056	0.7014	0.699	0.6944	0.6921	0.6882	0.6859	0.6824	0.6802	0.6765	0.6741	0.6711	0.6694
6	705	1.2497	1.0891	0.9885	0.945	0.9231	0.9097	0.8967	0.8839	0.8656	0.8489	0.8352	0.8271	0.8179	0.8109	0.8022	0.7967	0.7899	0.784	0.7773	0.7724	0.7666	0.7612	0.7559	0.7517	0.7459	0.742	0.737	0.7328	0.728	0.7243	0.7198	0.716	0.7119	0.7087	0.7044	0.7012	0.6974	0.6947	0.6908	0.6879	0.6845	0.6819	0.6789	0.6763	0.6733	0.6701	0.6674	0.6656
6	705	1.2497	1.1019	0.9953	0.9577	0.9365	0.9222	0.9076	0.8907	0.8733	0.8553	0.8418	0.8337	0.8252	0.8178	0.8093	0.8031	0.7965	0.7905	0.7836	0.7783	0.773	0.7673	0.762	0.7577	0.752	0.7479	0.743	0.7383	0.7339	0.7298	0.7254	0.7213	0.7175	0.7142	0.7099	0.7067	0.7026	0.6998	0.696	0.6931	0.6898	0.6872	0.684	0.681	0.6782	0.6752	0.6725	0.6706
7	707	1.2497	1.0985	1.0463	1.0651	1.0535	1.042	1.0323	1.026	1.0178	1.0092	1.0032	0.9958	0.9901	0.9844	0.9787	0.9736	0.9686	0.964	0.959	0.9541	0.9493	0.945	0.9406	0.9368	0.9332	0.93	0.9261	0.9233	0.9209	0.9176	0.915	0.9125	0.9102	0.9087	0.9065	0.9042	0.9027	0.9011	0.899	0.8978	0.8965	0.8944	0.8936	0.8913	0.8901	0.8884	0.8875	0.8869
7	707	1.2497	1.134	1.0438	1.0295	1.0178	1.0071	0.9978	0.9895	0.9835	0.9763	0.9708	0.9659	0.9614	0.9566	0.9519	0.9471	0.9435	0.939	0.9354	0.9321	0.9288	0.9261	0.9233	0.9211	0.9183	0.9161	0.9138	0.9113	0.9091	0.9074	0.9056	0.9035	0.9016	0.8995	0.8983	0.8965	0.8946	0.8933	0.8918	0.8901	0.8887	0.8871	0.8859	0.8845	0.883	0.8817	0.8806	0.8789
7	707	1.2497	1.1113	1.1136	1.1023	1.0943	1.0854	1.0787	1.0699	1.0614	1.0533	1.046	1.0391	1.0335	1.027	1.0207	1.0154	1.0094	1.0039	0.9987	0.9938	0.9888	0.9839	0.9789	0.975	0.9705	0.9664	0.962	0.9575	0.9538	0.9495	0.9458	0.9419	0.9385	0.9356	0.9327	0.9302	0.9285	0.9269	0.925	0.924	0.9224	0.9204	0.9194	0.9166	0.916	0.914	0.913	0.9127
8	708	1.2497	1.1009	1.0088	0.9669	0.9471	0.9337	0.9222	0.9117	0.9008	0.8844	0.874	0.8644	0.8538	0.8422	0.8323	0.8239	0.8162	0.8094	0.8027	0.7967	0.7912	0.7847	0.7795	0.7747	0.7689	0.7645	0.7595	0.7543	0.7498	0.7455	0.741	0.7367	0.7328	0.7286	0.7247	0.721	0.7172	0.7137	0.7103	0.7067	0.7036	0.7004	0.6972	0.6937	0.6911	0.6878	0.685	0.6825
8	708	1.2497	1.0887	0.9944	0.9513	0.9308	0.9182	0.9066	0.8957	0.8838	0.8654	0.8523	0.847	0.8357	0.8245	0.8141	0.807	0.7999	0.7932	0.7868	0.7807	0.7754	0.7696	0.764	0.7595	0.7539	0.7489	0.7443	0.7396	0.7353	0.7307	0.7265	0.722	0.7185	0.7147	0.7108	0.7069	0.7036	0.7003	0.6965	0.6933	0.69	0.687	0.6842	0.6807	0.6782	0.6749	0.6723	0.6698
8	708	1.2497	1.0763	0.9855	0.9413	0.9229	0.9087	0.8977	0.8887	0.8788	0.8656	0.8545	0.8434	0.8312	0.8191	0.8104	0.8028	0.7954	0.7887	0.7822	0.7761	0.7699	0.7644	0.7588	0.7537	0.7483	0.7436	0.7385	0.734	0.7299	0.725	0.7207	0.7165	0.7126	0.7089	0.7049	0.7008	0.6977	0.6942	0.6903	0.6873	0.684	0.6805	0.678	0.6746	0.6715	0.6687	0.666	0.6634
9	715	1.2497	1.0957	0.8192	0.7379	0.7045	0.6905	0.6818	0.6737	0.6651	0.6568	0.6495	0.6421	0.6357	0.629	0.6225	0.6167	0.6108	0.6051	0.5994	0.5941	0.5889	0.5839	0.5789	0.5745	0.5701	0.5657	0.5613	0.5573	0.5538	0.5493	0.5455	0.5413	0.5373	0.5331	0.5291	0.5255	0.5216	0.5177	0.5142	0.5117	0.5099	0.5083	0.5073	0.5051	0.5042	0.5024	0.5009	0.4999
9	715	1.2497	1.1054	0.8276	0.7411	0.7072	0.6948	0.6858	0.6777	0.669	0.6606	0.6535	0.6455	0.6393	0.6325	0.6252	0.6194	0.6136	0.6077	0.602	0.5965	0.591	0.5862	0.5813	0.5768	0.5721	0.5677	0.5631	0.5593	0.5555	0.5513	0.547	0.5428	0.5394	0.5354	0.5313	0.5277	0.5237	0.5199	0.5157	0.512	0.5085	0.5053	0.5031	0.5003	0.498	0.495	0.4923	0.4902
9	715	1.2497	1.1325	0.8422	0.7649	0.7364	0.7226	0.7127	0.7039	0.6948	0.6861	0.6791	0.6711	0.6645	0.6576	0.6509	0.6446	0.6389	0.6329	0.6271	0.6219	0.6163	0.6112	0.6062	0.6017	0.597	0.593	0.5883	0.5842	0.5807	0.5766	0.5727	0.5691	0.5655	0.5625	0.5587	0.5546	0.5506	0.5458	0.5416	0.5392	0.5374	0.5356	0.5344	0.5324	0.5308	0.5288	0.527	0.5256
10	Geobacillus stearothermophilis esterase	1.2497	0.7974	0.6128	0.5135	0.4604	0.4134	0.3799	0.3656	0.3505	0.3338	0.3214	0.3095	0.3013	0.2937	0.2877	0.2822	0.2775	0.2731	0.2696	0.2664	0.263	0.2599	0.2575	0.2548	0.2525	0.2509	0.2496	0.248	0.2471	0.245	0.2435	0.2424	0.2416	0.2402	0.2391	0.2376	0.2373	0.236	0.2347	0.234	0.2328	0.2317	0.2315	0.2302	0.2294	0.2283	0.2279	0.2271
10	Geobacillus stearothermophilis esterase	1.2497	0.8043	0.6148	0.5239	0.4751	0.4325	0.393	0.3774	0.3616	0.3445	0.3315	0.3206	0.3124	0.3049	0.2987	0.2933	0.289	0.2877	0.2848	0.2829	0.2743	0.2715	0.2689	0.2674	0.2653	0.2637	0.2623	0.2609	0.2602	0.2581	0.2571	0.256	0.2555	0.2547	0.2541	0.2526	0.2527	0.2517	0.2508	0.2501	0.2499	0.2486	0.2488	0.2473	0.2468	0.2463	0.2462	0.2451
10	Geobacillus stearothermophilis esterase	1.2497	0.8165	0.6017	0.4918	0.443	0.4105	0.3633	0.3496	0.3355	0.3164	0.3039	0.2928	0.2846	0.2769	0.2705	0.2649	0.2606	0.2557	0.2521	0.2483	0.2456	0.2425	0.2399	0.2376	0.2352	0.2337	0.2318	0.2299	0.2284	0.2265	0.2248	0.2235	0.2224	0.2212	0.2202	0.2185	0.2174	0.2163	0.2153	0.2141	0.2132	0.212	0.2116	0.2104	0.2094	0.2082	0.208	0.2073
11	Bacillus subilis esterase	1.2497	1.0198	0.7836	0.6891	0.6545	0.6387	0.6274	0.62	0.6142	0.6085	0.6057	0.601	0.5978	0.5951	0.5914	0.5879	0.5845	0.5811	0.5774	0.5762	0.5733	0.5698	0.5672	0.5644	0.5613	0.5589	0.5561	0.5535	0.5512	0.5483	0.5461	0.544	0.5419	0.5396	0.5374	0.535	0.5333	0.5311	0.529	0.5272	0.5256	0.5231	0.5221	0.5198	0.5181	0.5164	0.515	0.5133
11	Bacillus subilis esterase	1.2497	1.0264	0.7911	0.7128	0.6882	0.6704	0.6596	0.6525	0.6469	0.6413	0.6375	0.6336	0.6301	0.6261	0.6217	0.6183	0.6149	0.6114	0.6075	0.604	0.6009	0.5979	0.5948	0.5919	0.5889	0.5864	0.5834	0.5806	0.5783	0.5753	0.5733	0.5708	0.5708	0.569	0.5665	0.5643	0.5621	0.5602	0.5582	0.5564	0.5545	0.5525	0.5512	0.5489	0.5475	0.5456	0.5441	0.5429
11	Bacillus subilis esterase	1.2497	1.0025	0.7834	0.7017	0.6654	0.6478	0.6353	0.6267	0.6195	0.6133	0.6094	0.6047	0.6012	0.5973	0.5937	0.59	0.5869	0.5832	0.5801	0.5767	0.5734	0.5703	0.5679	0.5646	0.562	0.5592	0.5562	0.5539	0.5515	0.5486	0.5464	0.544	0.5418	0.5398	0.5373	0.5352	0.5333	0.5315	0.529	0.5273	0.5257	0.5236	0.5223	0.5202	0.5185	0.5168	0.5152	0.514
12	Aspergilis oryzae lipase	1.2497	1.1363	1.0846	1.0757	1.0379	1.0328	1.0291	1.0291	1.0296	1.0263	1.0248	1.0239	1.0226	1.0213	1.0191	1.0166	1.0154	1.0141	1.0123	1.0111	1.0098	1.008	1.006	1.0056	1.0031	1.0018	1.0006	0.9989	0.9978	0.9964	0.9951	0.9928	0.9923	0.9905	0.9891	0.9877	0.9866	0.9852	0.9837	0.9824	0.9809	0.9798	0.9786	0.977	0.9757	0.9739	0.973	0.972
12	Aspergilis oryzae lipase	1.2497	1.1421	1.0903	1.0757	1.0686	1.0641	1.0598	1.0553	1.054	1.0513	1.049	1.0474	1.0471	1.047	1.0439	1.0434	1.041	1.0397	1.0381	1.0363	1.0346	1.0333	1.0314	1.03	1.0285	1.0271	1.0257	1.0243	1.0227	1.021	1.02	1.0178	1.0166	1.0153	1.0141	1.0123	1.0108	1.0095	1.008	1.0068	1.0053	1.0038	1.0031	1.001	0.9996	0.998	0.9971	0.9959
12	Aspergilis oryzae lipase	1.2497	1.1614	1.1104	1.0972	1.0914	1.0884	1.086	1.0835	1.083	1.0779	1.0761	1.0744	1.0712	1.0702	1.0673	1.0659	1.0641	1.0628	1.0599	1.0584	1.0575	1.0554	1.0538	1.0528	1.0504	1.0493	1.0481	1.0459	1.0447	1.0446	1.0431	1.0409	1.041	1.0394	1.0381	1.0367	1.0348	1.0339	1.0323	1.0309	1.0294	1.0282	1.0273	1.0254	1.0241	1.0225	1.0215	1.0206
13	Candita antarctica lipase A	1.2497	1.1501	1.1	1.0872	1.0856	1.0833	1.0822	1.0816	1.0781	1.0772	1.0747	1.0739	1.0734	1.0729	1.0728	1.0728	1.0722	1.0711	1.0705	1.0703	1.0692	1.0692	1.0683	1.0682	1.0672	1.067	1.0663	1.0659	1.0653	1.0651	1.0646	1.0633	1.063	1.0626	1.0619	1.0613	1.0607	1.0602	1.0594	1.0588	1.0582	1.0575	1.0573	1.0565	1.0557	1.0548	1.0543	1.0542
13	Candita antarctica lipase A	1.2497	1.1486	1.0943	1.0806	1.0763	1.0751	1.074	1.0726	1.0724	1.0701	1.0689	1.0693	1.0701	1.0695	1.0685	1.0678	1.0683	1.0671	1.0666	1.0666	1.0657	1.0652	1.0648	1.0645	1.0637	1.0635	1.0628	1.0621	1.0622	1.0612	1.0604	1.0597	1.0595	1.0589	1.0582	1.0575	1.0572	1.0562	1.0557	1.0551	1.0544	1.0538	1.0537	1.0526	1.0521	1.0512	1.0506	1.0501
13	Candita antarctica lipase A	1.2497	1.1521	1.0968	1.0819	1.0776	1.0752	1.0747	1.0726	1.0718	1.0709	1.0697	1.0694	1.0705	1.0699	1.0691	1.0682	1.0677	1.0669	1.0664	1.0658	1.0652	1.0647	1.0641	1.0633	1.0632	1.0627	1.0622	1.0613	1.061	1.0605	1.0597	1.0592	1.0587	1.0575	1.0572	1.0561	1.0563	1.0553	1.0544	1.054	1.0537	1.0525	1.0525	1.0513	1.0505	1.05	1.0495	1.0494
14	Candita antarctica lipase B	1.2497	1.1691	1.046	0.9769	0.942	0.9139	0.8889	0.867	0.848	0.8302	0.8154	0.8017	0.7905	0.7796	0.7702	0.762	0.7547	0.748	0.7423	0.7371	0.7324	0.7284	0.7249	0.722	0.719	0.7169	0.7144	0.7124	0.7108	0.7088	0.7076	0.7063	0.7054	0.7043	0.7035	0.7024	0.7019	0.7011	0.7003	0.6999	0.6991	0.6984	0.6985	0.6978	0.6972	0.6966	0.6965	0.6964
14	Candita antarctica lipase B	1.2497	1.16	1.0363	0.9676	0.932	0.9036	0.8788	0.8568	0.8378	0.8201	0.8056	0.7923	0.7811	0.7706	0.7612	0.7532	0.7462	0.7396	0.7343	0.7292	0.7248	0.721	0.7176	0.7146	0.7118	0.7097	0.7072	0.7056	0.7044	0.7023	0.7011	0.6999	0.6991	0.698	0.6968	0.6962	0.6955	0.695	0.6941	0.6937	0.6932	0.6924	0.6926	0.6917	0.6912	0.6906	0.6907	0.6904
14	Candita antarctica lipase B	1.2497	1.1418	1.0203	0.9537	0.9201	0.8936	0.87	0.8493	0.831	0.8138	0.7999	0.7864	0.7757	0.7652	0.7559	0.7478	0.7407	0.7341	0.7286	0.7237	0.719	0.7151	0.712	0.7087	0.7058	0.7037	0.7012	0.6994	0.6978	0.696	0.6947	0.6933	0.6925	0.6913	0.6907	0.6896	0.689	0.6884	0.6875	0.6871	0.6865	0.686	0.6878	0.6872	0.6869	0.6863	0.6859	0.6859
15	Rhizopus oryzae esterase	1.2497	0.823	0.7634	0.7391	0.7305	0.7198	0.715	0.711	0.7069	0.7035	0.7012	0.6988	0.697	0.6946	0.6921	0.6903	0.6883	0.6862	0.6841	0.6821	0.68	0.6784	0.6764	0.6747	0.6728	0.6713	0.6693	0.6676	0.6663	0.6639	0.6626	0.6606	0.6592	0.6577	0.6559	0.6543	0.6528	0.6513	0.6498	0.6484	0.6468	0.6451	0.6444	0.6423	0.6409	0.6394	0.6382	0.6371
15	Rhizopus oryzae esterase	1.2497	0.8124	0.7626	0.7729	0.7727	0.7752	0.7713	0.7667	0.7613	0.7575	0.7556	0.7535	0.7515	0.749	0.7466	0.7446	0.7422	0.7398	0.7378	0.7357	0.7335	0.7315	0.7295	0.7279	0.7257	0.724	0.7213	0.7195	0.718	0.7158	0.7142	0.7121	0.7102	0.7088	0.7071	0.705	0.7034	0.7017	0.6995	0.6985	0.6966	0.6948	0.6936	0.6917	0.6898	0.6882	0.6869	0.6856
15	Rhizopus oryzae esterase	1.2497	0.8316	0.7827	0.7674	0.7595	0.7574	0.7542	0.7509	0.7487	0.7453	0.7446	0.741	0.7398	0.7371	0.735	0.7336	0.731	0.729	0.7264	0.7243	0.7221	0.7214	0.7182	0.7173	0.7145	0.713	0.7106	0.7088	0.7071	0.7052	0.7039	0.7016	0.6998	0.6982	0.6963	0.6949	0.6931	0.6916	0.6898	0.688	0.6868	0.6852	0.684	0.6818	0.6802	0.6787	0.6773	0.6761
16	Aspergilis oryzae phospholipase	1.2497	1.2138	1.1284	1.1166	1.1112	1.1125	1.1158	1.119	1.1153	1.1207	1.1208	1.1188	1.1214	1.121	1.1205	1.121	1.121	1.1187	1.117	1.1165	1.1152	1.1141	1.113	1.1113	1.1096	1.1103	1.1087	1.1069	1.1058	1.1033	1.1024	1.1011	1.0994	1.0985	1.0971	1.0952	1.0938	1.0927	1.0907	1.09	1.0882	1.0864	1.0855	1.0841	1.0831	1.0822	1.08	1.0786
16	Aspergilis oryzae phospholipase	1.2497	1.2065	1.1325	1.1111	1.1392	1.197	1.199	1.1927	1.1914	1.189	1.1905	1.1871	1.1895	1.1859	1.186	1.1833	1.1841	1.1854	1.182	1.1776	1.1749	1.173	1.1699	1.1694	1.1671	1.1656	1.165	1.1627	1.1616	1.1607	1.1586	1.1561	1.1564	1.1543	1.1527	1.1515	1.15	1.1481	1.1472	1.1445	1.1437	1.1413	1.1415	1.1388	1.1384	1.1459	1.1356	1.1328
16	Aspergilis oryzae phospholipase	1.2497	1.2005	1.1361	1.1158	1.1365	1.1926	1.2048	1.1882	1.1832	1.181	1.1899	1.1827	1.1819	1.1832	1.1841	1.1808	1.1809	1.1843	1.1783	1.1807	1.1741	1.1759	1.1747	1.1739	1.1724	1.1717	1.1712	1.1696	1.168	1.1662	1.1655	1.1629	1.1636	1.1624	1.1607	1.159	1.1578	1.1562	1.1556	1.1531	1.1526	1.1508	1.1501	1.1479	1.1473	1.146	1.1442	1.1426
17	Pseudomonas sp. lipoprotein lipase	1.2497	0.8616	0.6469	0.6279	0.6156	0.605	0.5949	0.5826	0.5748	0.5724	0.5701	0.5582	0.5507	0.5429	0.5372	0.531	0.5253	0.5206	0.5146	0.5097	0.5041	0.5001	0.496	0.4921	0.4882	0.4864	0.4824	0.4794	0.4769	0.474	0.4719	0.4699	0.4677	0.4663	0.4649	0.4634	0.4621	0.4613	0.4599	0.4591	0.4583	0.4565	0.4564	0.4551	0.4542	0.4535	0.4537	0.4536
17	Pseudomonas sp. lipoprotein lipase	1.2497	0.8965	0.6759	0.6589	0.6431	0.6204	0.6107	0.5998	0.5913	0.5862	0.5799	0.5711	0.5645	0.5587	0.55	0.5439	0.5372	0.5305	0.5252	0.5205	0.5147	0.5103	0.5075	0.5028	0.4992	0.4965	0.4929	0.4899	0.4876	0.4849	0.4825	0.4806	0.4789	0.4778	0.4759	0.474	0.4733	0.4722	0.4708	0.4706	0.4696	0.4685	0.4683	0.4673	0.4667	0.466	0.4665	0.4659
17	Pseudomonas sp. lipoprotein lipase	1.2497	0.8965	0.6604	0.6518	0.6298	0.6215	0.6139	0.6023	0.5916	0.5855	0.5789	0.5717	0.5658	0.5585	0.5513	0.5445	0.5405	0.5338	0.5287	0.5229	0.5188	0.515	0.5107	0.5068	0.5035	0.5003	0.4978	0.496	0.4931	0.4903	0.4884	0.4867	0.4853	0.4837	0.4819	0.4806	0.4809	0.4793	0.4783	0.4774	0.4763	0.4759	0.4763	0.4749	0.4749	0.4739	0.4733	0.474
18	Bovine pancreas phospholipase	1.2497	1.1605	1.0735	1.0416	1.0309	1.0256	1.0208	1.0179	1.0147	1.0104	1.0091	1.0058	1.0048	1.0018	0.9992	0.9973	0.9948	0.9934	0.9903	0.9891	0.9875	0.9852	0.9843	0.9828	0.9806	0.979	0.9776	0.9766	0.975	0.9733	0.9721	0.9706	0.9696	0.9679	0.9669	0.9654	0.9643	0.9628	0.9616	0.9606	0.9594	0.9583	0.9572	0.956	0.9548	0.9534	0.9527	0.9514
18	Bovine pancreas phospholipase	1.2497	1.2073	1.118	1.0792	1.0665	1.0605	1.056	1.0529	1.0488	1.0438	1.0417	1.0392	1.0368	1.0341	1.0324	1.0298	1.0291	1.0262	1.0248	1.0232	1.0219	1.0195	1.0183	1.0161	1.0142	1.0144	1.0119	1.0101	1.0091	1.0074	1.0059	1.0046	1.0033	1.0012	0.9998	0.9985	0.9972	0.996	0.9951	0.9936	0.992	0.991	0.9904	0.9885	0.987	0.986	0.9854	0.984
18	Bovine pancreas phospholipase	1.2497	1.2016	1.1126	1.074	1.0629	1.0573	1.0529	1.0504	1.0479	1.044	1.0431	1.0408	1.038	1.0367	1.0344	1.0321	1.0303	1.0287	1.0265	1.0254	1.0238	1.0224	1.021	1.0188	1.0177	1.0158	1.0144	1.0123	1.0113	1.0091	1.0083	1.0065	1.0056	1.0037	1.0028	1.0007	1	0.9986	0.9972	0.9957	0.9948	0.9929	0.9924	0.9907	0.9898	0.9882	0.9877	0.9862
	lysate	1.2497	1.0386	0.9923	0.9832	0.9746	0.9691	0.9656	0.9635	0.962	0.9603	0.9594	0.9583	0.9582	0.957	0.9562	0.9552	0.9544	0.9532	0.9522	0.9515	0.9504	0.9495	0.9488	0.9481	0.947	0.9465	0.9453	0.9444	0.9436	0.9426	0.9418	0.9406	0.9398	0.9388	0.9375	0.9366	0.9352	0.9341	0.9327	0.9316	0.93	0.9279	0.9266	0.9243	0.9212	0.9188	0.9162	0.914
	lysate	1.2497	1.0976	1.0454	1.0396	1.0309	1.0274	1.0245	1.022	1.0201	1.0176	1.0167	1.015	1.0147	1.0133	1.0121	1.0113	1.0105	1.0096	1.0084	1.0076	1.006	1.0057	1.0045	1.0038	1.0027	1.0019	1.0005	1	0.9989	0.9974	0.9966	0.9951	0.9944	0.9932	0.9923	0.9905	0.9895	0.9882	0.9861	0.9849	0.9825	0.9798	0.9778	0.9743	0.9715	0.9694	0.9678	0.9659
	lysate	1.2497	1.0622	1.011	0.9941	0.9889	0.9876	0.9868	0.9861	0.9854	0.9839	0.9832	0.982	0.9818	0.9808	0.9798	0.9792	0.9782	0.977	0.9763	0.9753	0.9743	0.973	0.9719	0.9713	0.9702	0.9691	0.9678	0.9667	0.9659	0.9642	0.963	0.9617	0.9604	0.9591	0.9571	0.9552	0.9536	0.9517	0.9487	0.9466	0.944	0.941	0.9392	0.9366	0.9344	0.9324	0.9311	0.9292
	MasterMix+BHET (G04)	1.2497	1.1451	1.0768	1.1345	1.1653	1.1766	1.1767	1.1582	1.1541	1.1545	1.1512	1.1492	1.1485	1.1478	1.1452	1.1441	1.1431	1.1418	1.1412	1.1401	1.1391	1.1377	1.1373	1.1364	1.1355	1.1349	1.134	1.1336	1.1325	1.1313	1.131	1.1298	1.1297	1.1286	1.128	1.1273	1.1268	1.1261	1.1256	1.1248	1.124	1.123	1.1231	1.1222	1.1217	1.1203	1.1203	1.1197
	MasterMix+BHET (G05)	1.2497	1.1492	1.0629	1.12	1.1436	1.1668	1.1697	1.1528	1.1507	1.1482	1.1439	1.1419	1.141	1.1387	1.1371	1.1367	1.1352	1.1341	1.1323	1.1316	1.1311	1.1297	1.129	1.1285	1.1265	1.1263	1.1252	1.1245	1.1239	1.1231	1.1223	1.1219	1.1208	1.1198	1.1199	1.1187	1.118	1.118	1.1168	1.1163	1.1156	1.1149	1.1142	1.1133	1.1125	1.1122	1.1118	1.1113
	MasterMix+BHET (G06)	1.2497	1.1548	1.1147	1.1272	1.1573	1.174	1.1837	1.1722	1.1634	1.1622	1.159	1.1551	1.1526	1.1516	1.1499	1.1473	1.1458	1.1445	1.1441	1.1423	1.14	1.1392	1.1379	1.1369	1.1353	1.1344	1.133	1.1324	1.1311	1.1301	1.1293	1.1288	1.1277	1.1275	1.1267	1.1265	1.1246	1.1241	1.1233	1.1227	1.1216	1.1213	1.1207	1.1198	1.1188	1.1183	1.1177	1.1167
	MaserMix No BHET	1.20155	1.1987	1.0876	1.0815	1.0819	1.0826	1.0816	1.0725	1.0601	1.0569	1.0524	1.0472	1.0418	1.039	1.0374	1.0358	1.0335	1.0318	1.0307	1.0299	1.0292	1.0281	1.0272	1.0267	1.0263	1.0256	1.0248	1.0242	1.0242	1.0226	1.0231	1.0222	1.0218	1.0213	1.0212	1.0206	1.0201	1.0197	1.0194	1.0195	1.019	1.0182	1.0187	1.0175	1.0175	1.0171	1.0172	1.0169
	MaserMix No BHET	1.18955	1.1925	1.0733	1.0766	1.0792	1.0801	1.0795	1.0699	1.0526	1.0492	1.0467	1.0427	1.0384	1.035	1.0332	1.0317	1.0318	1.0301	1.0292	1.0281	1.0279	1.0276	1.0268	1.0264	1.0263	1.026	1.0256	1.025	1.0249	1.0242	1.024	1.0236	1.0239	1.0234	1.0232	1.0228	1.0224	1.0222	1.0218	1.0219	1.0217	1.021	1.0211	1.0206	1.0203	1.0199	1.0207	1.0198
	MaserMix No BHET	1.18235	1.1771	1.0785	1.0691	1.068	1.0672	1.0648	1.0503	1.0414	1.0375	1.0307	1.0244	1.0203	1.0182	1.0162	1.014	1.0137	1.0117	1.0109	1.0095	1.009	1.0082	1.0076	1.0066	1.0059	1.0054	1.0044	1.0038	1.0037	1.0027	1.0021	1.0015	1.0012	1.0007	1.0003	0.9999	0.9995	0.9994	0.9991	0.9984	0.9979	0.9975	0.9975	0.9968	0.9967	0.996	0.9962	0.9958
No BHET Control
	avg. time [s]	0	899.99	1799.99	2699.99	3599.99	4499.99	5399.99	6299.99	7199.99	8099.99	8999.99	9899.99	10800	11700	12600	13500	14400	15300	16200	17100	18000	18900	19800	20700	21600	22500	23400	24300	25200	26100	27000	27900	28800	29700	30600	31500	32400	33300	34200	35100	36000	36900	37800	38700	39600	40500	41400	42300
	Time (min)	0	14.9998	29.9998	44.9998	59.9998	74.9998	89.9998	105	120	135	150	165	180	195	210	225	240	255	270	285	300	315	330	345	360	375	390	405	420	435	450	465	480	495	510	525	540	555	570	585	600	615	630	645	660	675	690	705
1	T. fusca cutinase	1.21193	1.2054	1.1942	1.19	1.192	1.1889	1.1909	1.1882	1.1904	1.1873	1.1897	1.1869	1.1891	1.1853	1.1865	1.1835	1.1852	1.1815	1.1838	1.1802	1.182	1.1792	1.1825	1.1786	1.1814	1.1778	1.18	1.177	1.1791	1.1758	1.1787	1.1758	1.1779	1.1751	1.1772	1.1742	1.1752	1.1747	1.178	1.1749	1.1751	1.1737	1.176	1.1746	1.1785	1.1773	1.1812	1.1804
1	T. fusca cutinase	1.2817	1.2737	1.2629	1.2563	1.2592	1.2537	1.2571	1.2533	1.2565	1.251	1.2554	1.2507	1.2547	1.2495	1.2523	1.2475	1.2512	1.2455	1.2496	1.2441	1.2479	1.2427	1.2485	1.2428	1.2475	1.2418	1.246	1.2408	1.245	1.2394	1.2445	1.2393	1.2439	1.2388	1.243	1.2377	1.2409	1.2382	1.2438	1.2386	1.2408	1.2372	1.2419	1.2383	1.2442	1.2409	1.2468	1.2437
1	T. fusca cutinase	1.28113	1.2748	1.2626	1.2592	1.2595	1.2575	1.2576	1.2563	1.2566	1.2548	1.2561	1.2545	1.255	1.2526	1.2527	1.2508	1.2515	1.2492	1.2495	1.2477	1.2481	1.2463	1.2484	1.2461	1.2471	1.2451	1.2448	1.2424	1.2442	1.2408	1.2433	1.2408	1.2426	1.2404	1.2418	1.2395	1.2398	1.2398	1.2422	1.24	1.2399	1.2388	1.2408	1.2399	1.243	1.2423	1.2456	1.2456
2	I. sakiensis PETase	1.26603	1.2555	1.2397	1.2318	1.233	1.229	1.2304	1.2269	1.2295	1.2257	1.2287	1.2251	1.2281	1.2237	1.2256	1.222	1.2244	1.2201	1.2227	1.2189	1.2217	1.2182	1.222	1.2181	1.2214	1.2174	1.2206	1.217	1.2201	1.2159	1.2199	1.216	1.2192	1.2159	1.2189	1.2151	1.217	1.2159	1.2198	1.2161	1.2174	1.215	1.2186	1.2164	1.2211	1.219	1.2239	1.2225
2	I. sakiensis PETase	1.27767	1.2659	1.248	1.2393	1.2392	1.2345	1.2348	1.2317	1.2329	1.2285	1.2315	1.2279	1.2309	1.2263	1.2284	1.2247	1.2273	1.223	1.2259	1.2215	1.2243	1.2207	1.2251	1.2206	1.2242	1.2201	1.2232	1.2199	1.2229	1.2186	1.2225	1.2185	1.222	1.2186	1.2218	1.2179	1.2197	1.2184	1.2226	1.2186	1.22	1.2175	1.2213	1.2188	1.2236	1.2215	1.2266	1.2248
2	I. sakiensis PETase	1.27093	1.2609	1.2448	1.2378	1.2386	1.2343	1.2363	1.2326	1.2348	1.2312	1.2339	1.2305	1.2333	1.2291	1.2308	1.2272	1.2295	1.2256	1.2282	1.2242	1.2264	1.2233	1.2273	1.2233	1.2267	1.2226	1.2255	1.2222	1.2251	1.2208	1.225	1.221	1.2243	1.2208	1.2238	1.22	1.2219	1.221	1.225	1.2212	1.2223	1.2202	1.2235	1.2226	1.2287	1.2287	1.235	1.2354
3	501	1.56983	1.6167	1.6807	1.719	1.7346	1.7436	1.7563	1.7504	1.7562	1.7522	1.759	1.7542	1.7597	1.7541	1.7584	1.757	1.7631	1.7597	1.7669	1.7627	1.7696	1.7664	1.7694	1.7668	1.773	1.7689	1.7738	1.77	1.7735	1.7691	1.7762	1.7715	1.7693	1.7669	1.7749	1.77	1.7748	1.7727	1.7793	1.7748	1.7775	1.7744	1.7791	1.7767	1.7831	1.7809	1.7847	1.7847
3	501	1.63127	1.7168	1.8072	1.8903	1.8479	1.9239	1.8762	1.9338	1.8788	1.9391	1.8871	1.9451	1.885	1.9457	1.885	1.949	1.8902	1.9503	1.8888	1.9533	1.8919	1.9563	1.893	1.9586	1.894	1.9597	1.8978	1.9598	1.8958	1.9629	1.9003	1.9665	1.9053	1.969	1.9049	1.9721	1.9038	1.9745	1.9136	1.9768	1.9112	1.9779	1.9135	1.9806	1.9182	1.9827	1.9193	1.9919
3	501	1.65127	1.6853	1.7478	1.7676	1.8051	1.7811	1.814	1.7854	1.8171	1.788	1.82	1.791	1.8198	1.7926	1.8192	1.7921	1.8184	1.7908	1.8186	1.7909	1.8185	1.7896	1.8191	1.7885	1.8212	1.7904	1.8201	1.7909	1.8211	1.7909	1.8214	1.7901	1.8217	1.7934	1.8227	1.7925	1.8233	1.795	1.8265	1.7957	1.8244	1.7956	1.8271	1.7992	1.8314	1.8043	1.8349	1.8072
4	702	1.3141	1.3086	1.2985	1.2953	1.2943	1.2916	1.2908	1.2908	1.2897	1.2886	1.2872	1.2869	1.2863	1.2847	1.2827	1.2819	1.2805	1.2793	1.2782	1.2778	1.2767	1.2761	1.2769	1.281	1.2798	1.2796	1.2784	1.2787	1.2774	1.2774	1.2767	1.2766	1.2762	1.2766	1.2754	1.2757	1.2729	1.2761	1.2762	1.2758	1.2729	1.275	1.2739	1.2756	1.2719	1.2729	1.2743	1.2763
4	702	1.3506	1.3406	1.3178	1.3142	1.3116	1.3115	1.3074	1.3097	1.3068	1.3077	1.3042	1.3053	1.3029	1.3036	1.2999	1.3008	1.2977	1.298	1.2953	1.2961	1.2938	1.2948	1.2935	1.294	1.292	1.2926	1.2908	1.2921	1.2895	1.2904	1.2893	1.29	1.2883	1.2893	1.2873	1.2887	1.285	1.2888	1.288	1.2889	1.2848	1.2878	1.2856	1.2884	1.2882	1.2907	1.2904	1.2939
4	702	1.3644	1.364	1.3608	1.3618	1.3554	1.3562	1.3521	1.3551	1.351	1.3571	1.3528	1.3586	1.3545	1.3572	1.3528	1.3544	1.3504	1.3518	1.3479	1.3498	1.3461	1.3491	1.3465	1.3489	1.3449	1.3476	1.3437	1.3466	1.3423	1.3453	1.3422	1.3449	1.3421	1.3448	1.3409	1.3441	1.3389	1.3444	1.3419	1.3445	1.3389	1.3435	1.3398	1.3439	1.3426	1.3463	1.3445	1.3497
5	703	1.35877	1.3505	1.3361	1.3309	1.3291	1.327	1.3262	1.3264	1.326	1.3253	1.3255	1.3249	1.3249	1.3235	1.3229	1.3221	1.3219	1.3205	1.3205	1.3193	1.319	1.3187	1.3197	1.3184	1.3191	1.3178	1.3177	1.317	1.3172	1.3162	1.3168	1.316	1.3162	1.3157	1.3157	1.3148	1.3134	1.315	1.3163	1.315	1.3136	1.3141	1.3142	1.3152	1.3168	1.3173	1.3191	1.321
5	703	1.35057	1.3424	1.3275	1.3227	1.3208	1.3195	1.3191	1.3193	1.3193	1.3184	1.3186	1.3183	1.3185	1.3172	1.3164	1.316	1.3158	1.3146	1.3144	1.3135	1.3136	1.3128	1.3145	1.313	1.3137	1.3126	1.3129	1.3122	1.3124	1.3114	1.3125	1.3115	1.3118	1.3113	1.3111	1.31	1.309	1.3106	1.3118	1.3107	1.3085	1.3096	1.3099	1.3105	1.3122	1.3131	1.3151	1.3165
5	703	1.35067	1.3433	1.3278	1.3245	1.3232	1.3242	1.3244	1.3237	1.3233	1.3228	1.3226	1.322	1.3218	1.321	1.3196	1.3193	1.3181	1.3175	1.3168	1.3156	1.3152	1.315	1.3163	1.3149	1.3159	1.3151	1.3146	1.3141	1.3145	1.3131	1.3141	1.3136	1.3135	1.313	1.3129	1.3123	1.3108	1.313	1.3141	1.312	1.3111	1.3114	1.3119	1.3129	1.3146	1.3152	1.3169	1.3188
6	705	1.32563	1.3154	1.2987	1.2917	1.2887	1.2848	1.2836	1.2811	1.2806	1.2798	1.2802	1.2795	1.2796	1.2782	1.2775	1.2769	1.2765	1.2754	1.2755	1.2743	1.2743	1.2737	1.2745	1.2739	1.2744	1.2733	1.2737	1.2732	1.273	1.2719	1.273	1.2718	1.2722	1.2717	1.2718	1.2712	1.2696	1.2713	1.2728	1.2715	1.2696	1.2702	1.2707	1.2714	1.2731	1.2741	1.2755	1.2771
6	705	1.37407	1.3664	1.3504	1.3469	1.3438	1.3426	1.3395	1.3373	1.3347	1.3336	1.334	1.334	1.333	1.3321	1.3315	1.3316	1.3304	1.3298	1.329	1.3284	1.3277	1.3279	1.3282	1.3276	1.3278	1.3271	1.3271	1.3268	1.3258	1.3259	1.3261	1.3256	1.3253	1.3248	1.3247	1.3245	1.3228	1.3249	1.3256	1.3248	1.3225	1.324	1.3237	1.3248	1.3264	1.3275	1.3282	1.3307
6	705	1.35003	1.3437	1.3325	1.3286	1.3275	1.3258	1.325	1.3246	1.3242	1.3238	1.3237	1.3234	1.3233	1.3223	1.3212	1.3208	1.3202	1.319	1.319	1.3182	1.3176	1.3173	1.3184	1.3172	1.3173	1.3173	1.3164	1.3164	1.3161	1.3149	1.3156	1.3147	1.3149	1.3145	1.3144	1.3139	1.3122	1.3141	1.315	1.3143	1.312	1.3128	1.3129	1.3139	1.3155	1.3163	1.3181	1.3196
7	707	1.2404	1.2557	1.2684	1.285	1.2949	1.3024	1.2982	1.296	1.2848	1.2775	1.273	1.2697	1.2661	1.2629	1.2612	1.2607	1.26	1.2597	1.2594	1.2596	1.2595	1.2602	1.2615	1.2615	1.2621	1.2622	1.2624	1.2631	1.2633	1.2633	1.2642	1.2643	1.2647	1.2652	1.265	1.2653	1.2634	1.2658	1.2671	1.267	1.2651	1.2665	1.2667	1.2685	1.2699	1.2716	1.2732	1.2757
7	707	1.2586	1.2744	1.2768	1.2993	1.3133	1.3227	1.3319	1.3363	1.3346	1.3353	1.3289	1.3164	1.3122	1.309	1.302	1.3026	1.3014	1.2989	1.2989	1.2993	1.299	1.2994	1.3013	1.3011	1.3021	1.3026	1.3031	1.304	1.304	1.3043	1.3056	1.306	1.3065	1.307	1.3075	1.3077	1.3067	1.3092	1.3108	1.3107	1.3091	1.3105	1.3115	1.3127	1.3146	1.3164	1.3181	1.3207
7	707	1.3179	1.3282	1.3293	1.3442	1.3562	1.3587	1.3528	1.3529	1.3487	1.3436	1.3369	1.334	1.331	1.3291	1.327	1.3266	1.3257	1.3251	1.3252	1.3253	1.325	1.3256	1.327	1.327	1.3277	1.3276	1.328	1.3286	1.3287	1.3287	1.3298	1.3299	1.3302	1.3307	1.3307	1.331	1.3297	1.3325	1.3339	1.3336	1.3319	1.3333	1.3337	1.3352	1.337	1.3387	1.3403	1.3428
8	708	1.3421	1.3339	1.3187	1.314	1.3112	1.3103	1.3099	1.3099	1.3089	1.3084	1.308	1.3078	1.3071	1.3065	1.3049	1.3045	1.3038	1.3032	1.3024	1.3019	1.3008	1.3009	1.3016	1.3011	1.3008	1.3001	1.2997	1.2996	1.2992	1.2984	1.2989	1.2983	1.298	1.2982	1.2976	1.297	1.2953	1.2975	1.2982	1.2975	1.2954	1.2966	1.2962	1.2976	1.2989	1.3001	1.3013	1.3035
8	708	1.35697	1.3482	1.3337	1.3278	1.325	1.3235	1.3216	1.3207	1.3197	1.3194	1.319	1.319	1.3183	1.3176	1.3161	1.3162	1.3153	1.3144	1.3138	1.3135	1.3124	1.3126	1.3131	1.3123	1.3122	1.3117	1.3113	1.3111	1.3108	1.31	1.3107	1.31	1.3097	1.3108	1.3102	1.3097	1.3079	1.3104	1.3109	1.3105	1.308	1.3093	1.309	1.3101	1.3115	1.3127	1.3139	1.316
8	708	1.3306	1.3226	1.3084	1.3035	1.301	1.3001	1.2993	1.2999	1.2986	1.2981	1.2977	1.2976	1.2968	1.2959	1.2943	1.2941	1.293	1.2923	1.2915	1.2912	1.2903	1.2901	1.2909	1.2901	1.2902	1.2895	1.2889	1.2887	1.2885	1.2876	1.2879	1.2877	1.2873	1.2871	1.2868	1.2863	1.2845	1.2866	1.2875	1.2867	1.2846	1.2856	1.2854	1.2865	1.2881	1.2891	1.2903	1.2926
9	715	1.37237	1.3741	1.3759	1.3776	1.3746	1.3717	1.3616	1.3585	1.3526	1.3478	1.3375	1.3369	1.3353	1.3328	1.3313	1.3308	1.3297	1.3283	1.3277	1.3271	1.3263	1.326	1.3273	1.3263	1.3261	1.3257	1.3252	1.3256	1.3246	1.3241	1.3246	1.3242	1.3242	1.3241	1.3237	1.3236	1.3217	1.324	1.3246	1.3243	1.3222	1.3231	1.323	1.3242	1.3259	1.327	1.3287	1.3308
9	715	1.36017	1.3631	1.3687	1.3703	1.3684	1.3667	1.3596	1.3533	1.3475	1.3404	1.3389	1.3397	1.3328	1.3298	1.3277	1.3267	1.3264	1.3251	1.3245	1.3238	1.3231	1.3228	1.324	1.323	1.3233	1.3224	1.3223	1.3224	1.3219	1.3212	1.322	1.3214	1.3214	1.3213	1.3211	1.3206	1.319	1.3212	1.3221	1.3215	1.3184	1.3198	1.3203	1.3214	1.3229	1.3243	1.3256	1.3276
9	715	1.43013	1.431	1.4384	1.436	1.4311	1.4289	1.4268	1.4269	1.4253	1.4231	1.4226	1.4193	1.4173	1.4154	1.4141	1.4126	1.4115	1.4108	1.4102	1.4095	1.4087	1.4082	1.4091	1.4081	1.4087	1.4078	1.4073	1.4074	1.4075	1.4066	1.4073	1.4068	1.4067	1.4065	1.4065	1.4061	1.4043	1.4064	1.4072	1.4063	1.4044	1.4056	1.4058	1.4068	1.4082	1.4094	1.4108	1.4133
10	Geobacillus stearothermophilis esterase	1.20887	1.1983	1.1804	1.1735	1.1719	1.1696	1.1689	1.1677	1.1666	1.1658	1.1653	1.1646	1.1638	1.163	1.1614	1.1611	1.16	1.1592	1.1584	1.1579	1.1571	1.1571	1.1575	1.1568	1.1565	1.1558	1.1553	1.1552	1.1545	1.154	1.1542	1.1537	1.1534	1.1532	1.1527	1.1522	1.1504	1.1525	1.1533	1.1525	1.1503	1.1513	1.1509	1.1522	1.1534	1.1546	1.1557	1.1575
10	Geobacillus stearothermophilis esterase	1.20663	1.2006	1.1915	1.187	1.187	1.1891	1.1905	1.19	1.1892	1.1892	1.1889	1.1891	1.1882	1.1874	1.1861	1.1863	1.1854	1.1849	1.1847	1.1845	1.1838	1.1839	1.1845	1.1834	1.1835	1.1828	1.1827	1.183	1.1822	1.1818	1.1819	1.1816	1.1814	1.1814	1.1806	1.1805	1.1787	1.1807	1.181	1.1807	1.1784	1.1796	1.1793	1.1808	1.1818	1.1832	1.1844	1.1869
10	Geobacillus stearothermophilis esterase	1.20513	1.2058	1.2	1.2039	1.201	1.204	1.2045	1.2032	1.2016	1.2027	1.2023	1.2025	1.2019	1.2011	1.1999	1.1998	1.1988	1.199	1.1989	1.199	1.1985	1.1987	1.1991	1.1985	1.1982	1.1978	1.1978	1.198	1.1974	1.1971	1.1974	1.1971	1.1968	1.1968	1.1958	1.196	1.1943	1.1964	1.1967	1.1965	1.1944	1.1952	1.195	1.1966	1.1979	1.1987	1.2	1.2026
11	Bacillus subilis esterase	1.19153	1.1961	1.1928	1.2013	1.207	1.212	1.2141	1.2182	1.2188	1.2192	1.2205	1.2216	1.2219	1.221	1.2193	1.2197	1.2197	1.221	1.2209	1.2216	1.2206	1.221	1.2206	1.2203	1.2202	1.2207	1.2205	1.2215	1.2202	1.2204	1.2203	1.2202	1.2201	1.2202	1.219	1.2192	1.2172	1.2196	1.2195	1.2195	1.2174	1.2185	1.2182	1.2195	1.2214	1.2222	1.2239	1.2259
11	Bacillus subilis esterase	1.20677	1.2124	1.2065	1.2179	1.2165	1.2154	1.2154	1.2149	1.2135	1.2138	1.2132	1.2125	1.212	1.2107	1.2086	1.2079	1.207	1.206	1.2056	1.2049	1.2037	1.2042	1.2048	1.2035	1.2034	1.2028	1.2029	1.2032	1.2022	1.2019	1.2019	1.2029	1.2027	1.2023	1.2015	1.2017	1.1997	1.2017	1.2018	1.2015	1.1995	1.2003	1.1999	1.2017	1.2027	1.204	1.2051	1.2075
11	Bacillus subilis esterase	1.21893	1.2099	1.1914	1.1871	1.1846	1.1807	1.1789	1.1809	1.179	1.1778	1.176	1.1757	1.1751	1.1737	1.172	1.1714	1.1703	1.1693	1.1682	1.1677	1.1663	1.1666	1.1672	1.1662	1.1656	1.1649	1.1645	1.1644	1.1638	1.163	1.1634	1.1628	1.1626	1.1622	1.1615	1.1612	1.1593	1.1616	1.1622	1.1614	1.159	1.1602	1.1599	1.1613	1.1624	1.1636	1.1645	1.1665
12	Aspergilis oryzae lipase	1.3141	1.2271	1.2162	1.2123	1.2087	1.2068	1.204	1.2034	1.2022	1.2014	1.201	1.201	1.2005	1.1999	1.1985	1.1981	1.1975	1.1961	1.1956	1.1951	1.1947	1.1946	1.1953	1.1942	1.1943	1.1934	1.193	1.1932	1.193	1.1924	1.1929	1.1924	1.1922	1.192	1.1912	1.1909	1.1892	1.1915	1.1921	1.1914	1.1894	1.1902	1.1898	1.1915	1.1927	1.1935	1.195	1.1971
12	Aspergilis oryzae lipase	1.4073	1.3042	1.2872	1.2819	1.2786	1.2762	1.2736	1.2726	1.2731	1.2709	1.2704	1.2705	1.2696	1.2689	1.2674	1.2674	1.2661	1.266	1.265	1.2648	1.2639	1.2641	1.2647	1.2639	1.2635	1.2631	1.2626	1.2622	1.2616	1.2612	1.2616	1.2609	1.2608	1.2607	1.2602	1.2597	1.2577	1.2602	1.2608	1.2605	1.2581	1.2595	1.259	1.2602	1.2614	1.2626	1.264	1.266
12	Aspergilis oryzae lipase	1.387	1.2963	1.2806	1.2759	1.274	1.2724	1.271	1.2711	1.2701	1.2696	1.2692	1.2691	1.2686	1.2676	1.2661	1.2658	1.2649	1.2641	1.2634	1.2628	1.2619	1.2627	1.2632	1.2622	1.2624	1.2613	1.2609	1.2608	1.2602	1.2603	1.2608	1.2602	1.2599	1.26	1.2593	1.2593	1.2576	1.2596	1.26	1.2594	1.2577	1.2585	1.2585	1.2599	1.2611	1.2622	1.2634	1.2653
13	Candita antarctica lipase A	1.3807	1.3044	1.2895	1.2849	1.2832	1.2825	1.2817	1.2817	1.2804	1.2805	1.2798	1.28	1.2792	1.2785	1.2768	1.2768	1.276	1.2752	1.2746	1.2741	1.2733	1.2736	1.2739	1.2733	1.2732	1.2725	1.272	1.2723	1.2713	1.271	1.2713	1.2711	1.2706	1.2711	1.2704	1.2702	1.2683	1.2704	1.2714	1.2706	1.2685	1.2696	1.2692	1.2707	1.2718	1.2731	1.2742	1.2766
13	Candita antarctica lipase A	1.3907	1.3136	1.2991	1.2944	1.2927	1.2922	1.2913	1.2913	1.2904	1.29	1.2895	1.2895	1.2889	1.2884	1.2868	1.2867	1.2857	1.2851	1.2845	1.2841	1.2832	1.2833	1.2839	1.2832	1.2829	1.2822	1.2819	1.2822	1.2812	1.2808	1.2811	1.2808	1.2805	1.2805	1.2798	1.2796	1.2777	1.2799	1.2805	1.2801	1.2777	1.2789	1.2785	1.2797	1.2812	1.2823	1.2834	1.2857
13	Candita antarctica lipase A	1.3889	1.3172	1.3025	1.2987	1.2974	1.2967	1.296	1.2965	1.2958	1.2956	1.2951	1.2958	1.2948	1.2942	1.2928	1.2925	1.2914	1.291	1.2902	1.2897	1.289	1.2891	1.2896	1.2889	1.2888	1.2882	1.2877	1.2885	1.2879	1.2868	1.2874	1.2868	1.2865	1.2867	1.2861	1.2858	1.2836	1.2865	1.2865	1.2864	1.2842	1.285	1.2851	1.2867	1.2877	1.2889	1.2898	1.2921
14	Candita antarctica lipase B	1.3324	1.2456	1.2296	1.222	1.2203	1.2164	1.2119	1.2095	1.2079	1.2076	1.2068	1.2068	1.2065	1.2053	1.2043	1.204	1.2032	1.2022	1.2015	1.2012	1.2007	1.2008	1.2012	1.2007	1.2006	1.2001	1.1999	1.1998	1.1991	1.1988	1.1992	1.1989	1.1986	1.1988	1.1984	1.198	1.1961	1.1988	1.1991	1.1989	1.1967	1.198	1.1977	1.199	1.2002	1.2016	1.2026	1.2047
14	Candita antarctica lipase B	1.316	1.2457	1.2293	1.2224	1.2206	1.2193	1.2175	1.2159	1.2143	1.2141	1.2134	1.2133	1.2128	1.2117	1.2105	1.2106	1.2096	1.2087	1.2082	1.2081	1.2074	1.2073	1.2083	1.2076	1.2075	1.2068	1.2066	1.2066	1.206	1.2057	1.2063	1.206	1.2059	1.206	1.2053	1.2054	1.2032	1.206	1.2067	1.2065	1.2042	1.2055	1.2054	1.2066	1.2081	1.2095	1.2107	1.2127
14	Candita antarctica lipase B	1.3575	1.2476	1.2313	1.226	1.223	1.2201	1.2188	1.2176	1.2169	1.2163	1.2155	1.2148	1.2152	1.213	1.2126	1.2118	1.2117	1.2104	1.2099	1.2093	1.2091	1.2089	1.2099	1.2093	1.2091	1.2085	1.2087	1.2082	1.2081	1.2072	1.2082	1.2082	1.2077	1.2077	1.2071	1.2073	1.2052	1.2078	1.2087	1.2086	1.2067	1.208	1.2082	1.2094	1.2105	1.212	1.2136	1.2158
15	Rhizopus oryzae esterase	1.53423	0.8098	0.7303	0.7153	0.7006	0.6885	0.6808	0.6744	0.6686	0.6619	0.6571	0.652	0.6479	0.6432	0.6386	0.6334	0.6297	0.6249	0.6206	0.6162	0.6121	0.608	0.6044	0.6019	0.5981	0.5945	0.5907	0.5869	0.5837	0.5801	0.5765	0.5739	0.5705	0.5672	0.5643	0.5608	0.5575	0.553	0.5528	0.5506	0.5473	0.5424	0.5408	0.5377	0.5366	0.5352	0.5338	0.5325
15	Rhizopus oryzae esterase	1.53423	0.8517	0.7658	0.7461	0.7336	0.7198	0.7114	0.7033	0.6972	0.691	0.6852	0.6795	0.675	0.6702	0.6648	0.6591	0.6549	0.6502	0.6455	0.6412	0.6369	0.6322	0.6286	0.6255	0.6213	0.6178	0.6136	0.6096	0.6063	0.6024	0.5987	0.5955	0.5919	0.5886	0.5854	0.5819	0.5788	0.5738	0.5731	0.5712	0.5675	0.5625	0.561	0.5575	0.5564	0.555	0.5534	0.5518
15	Rhizopus oryzae esterase	1.53423	0.8713	0.7728	0.7518	0.7408	0.7318	0.7239	0.7177	0.7178	0.712	0.7077	0.7038	0.6992	0.6942	0.6906	0.6856	0.6815	0.6768	0.6722	0.6677	0.6639	0.6593	0.6554	0.6526	0.649	0.6455	0.6416	0.6383	0.635	0.6311	0.6276	0.6247	0.6217	0.6183	0.6151	0.6114	0.6086	0.6036	0.6032	0.6008	0.5976	0.5925	0.5908	0.5878	0.5867	0.5855	0.5838	0.5825
16	Aspergilis oryzae phospholipase	1.4484	1.3534	1.3393	1.3339	1.3308	1.3306	1.3292	1.328	1.3266	1.3264	1.3261	1.3261	1.325	1.3244	1.3231	1.3227	1.3217	1.3216	1.3206	1.3204	1.3199	1.3201	1.3206	1.3199	1.3194	1.3193	1.3187	1.3188	1.3184	1.3176	1.3183	1.3179	1.3174	1.3175	1.317	1.3166	1.3151	1.318	1.3178	1.3173	1.3153	1.316	1.3163	1.3178	1.3185	1.3199	1.321	1.3232
16	Aspergilis oryzae phospholipase	1.4289	1.3498	1.3366	1.3326	1.3309	1.3295	1.3276	1.3275	1.3266	1.3264	1.3258	1.3258	1.3251	1.3247	1.3232	1.3227	1.322	1.3213	1.3211	1.3203	1.3198	1.3198	1.3206	1.3204	1.3198	1.3194	1.3189	1.3187	1.3189	1.318	1.3187	1.318	1.3176	1.3182	1.3173	1.317	1.3151	1.3176	1.3176	1.3173	1.3153	1.3166	1.3162	1.3178	1.3191	1.3192	1.3216	1.3235
16	Aspergilis oryzae phospholipase	1.4617	1.3575	1.3435	1.3396	1.3387	1.3378	1.3368	1.3368	1.3358	1.3354	1.3349	1.3352	1.3347	1.3339	1.3324	1.3324	1.3313	1.3311	1.3302	1.3298	1.3292	1.3295	1.33	1.3297	1.3294	1.3288	1.3282	1.3286	1.3275	1.3276	1.3278	1.3274	1.3273	1.3269	1.3267	1.326	1.3247	1.3268	1.3278	1.3272	1.3247	1.3258	1.3255	1.3268	1.3307	1.3295	1.3306	1.3331
17	Pseudomonas sp. lipoprotein lipase	1.16973	1.1553	1.1336	1.1228	1.1136	1.1073	1.1009	1.096	1.0892	1.0824	1.0787	1.0756	1.0726	1.0703	1.0674	1.0657	1.0635	1.062	1.0607	1.0587	1.0585	1.057	1.0576	1.0565	1.0559	1.0538	1.0533	1.0534	1.0526	1.0513	1.0517	1.0506	1.05	1.0486	1.0478	1.0474	1.0442	1.0461	1.0464	1.0445	1.0417	1.0419	1.0413	1.0424	1.0432	1.044	1.0447	1.0462
17	Pseudomonas sp. lipoprotein lipase	1.1521	1.1386	1.1191	1.1086	1.0998	1.0926	1.0668	1.0635	1.0568	1.0519	1.0474	1.0461	1.0425	1.0408	1.0383	1.0372	1.0343	1.033	1.031	1.0298	1.0272	1.0272	1.0271	1.0256	1.024	1.024	1.023	1.0223	1.0217	1.0202	1.0201	1.0191	1.0191	1.0188	1.0178	1.0172	1.0144	1.0163	1.017	1.0167	1.0141	1.0143	1.0143	1.015	1.0155	1.0167	1.0169	1.0192
17	Pseudomonas sp. lipoprotein lipase	1.12957	1.1163	1.1029	1.0897	1.0828	1.0765	1.07	1.0665	1.0622	1.0594	1.0556	1.0535	1.051	1.0491	1.0463	1.0452	1.0427	1.0405	1.0392	1.0372	1.0355	1.0357	1.0349	1.0335	1.0329	1.0312	1.031	1.0296	1.0284	1.0274	1.0279	1.026	1.0256	1.0255	1.0245	1.0231	1.022	1.0233	1.0233	1.0238	1.0208	1.0207	1.0211	1.0206	1.0217	1.022	1.0232	1.0252
18	Bovine pancreas phospholipase	1.3013	1.2228	1.212	1.208	1.2043	1.2008	1.198	1.1966	1.1954	1.1947	1.1943	1.1937	1.1935	1.1925	1.1912	1.1907	1.1898	1.1884	1.1879	1.1871	1.1861	1.186	1.1867	1.1856	1.1853	1.1845	1.1838	1.1836	1.1828	1.1824	1.1824	1.1819	1.1815	1.1813	1.1811	1.1804	1.1784	1.1807	1.1814	1.1805	1.1782	1.1792	1.1794	1.1801	1.1812	1.1823	1.1831	1.1851
18	Bovine pancreas phospholipase	1.3565	1.275	1.2611	1.2557	1.2522	1.249	1.2443	1.2426	1.2403	1.2389	1.2377	1.2375	1.2364	1.2356	1.2339	1.2335	1.232	1.2314	1.2299	1.2287	1.2279	1.2279	1.2285	1.2275	1.2272	1.2265	1.226	1.2259	1.2248	1.2245	1.2243	1.2242	1.224	1.2246	1.2234	1.2227	1.2207	1.2233	1.2236	1.2256	1.2205	1.2216	1.2207	1.2223	1.2232	1.2244	1.2255	1.2276
18	Bovine pancreas phospholipase	1.3792	1.2918	1.2778	1.2728	1.2695	1.2673	1.2641	1.2628	1.2611	1.2597	1.2592	1.2589	1.2575	1.2565	1.2548	1.2537	1.2526	1.2518	1.2506	1.2501	1.249	1.2489	1.2489	1.2478	1.2478	1.2468	1.246	1.2458	1.2449	1.2443	1.2444	1.2436	1.2428	1.243	1.2424	1.2414	1.2397	1.242	1.2433	1.2428	1.2389	1.2407	1.2395	1.2414	1.2421	1.2432	1.2441	1.2475
	lysate	1.2277	1.1332	1.1238	1.1231	1.1236	1.1248	1.1246	1.1262	1.1264	1.1272	1.1274	1.128	1.1283	1.1279	1.1266	1.1269	1.1266	1.1259	1.1253	1.1253	1.1244	1.1244	1.1247	1.1246	1.1239	1.1236	1.1225	1.1232	1.1226	1.1218	1.1222	1.1219	1.1223	1.122	1.121	1.1212	1.1193	1.1221	1.1225	1.1227	1.1201	1.121	1.1213	1.1224	1.1237	1.1251	1.1266	1.1287
	lysate	1.2974	1.1874	1.1698	1.167	1.1661	1.1658	1.1651	1.1656	1.1646	1.1649	1.165	1.1661	1.1657	1.1652	1.1644	1.1645	1.1642	1.1633	1.1627	1.1623	1.1614	1.1617	1.1622	1.1617	1.1614	1.1613	1.1602	1.1605	1.16	1.1598	1.1598	1.1599	1.1597	1.16	1.1589	1.1594	1.157	1.16	1.1606	1.1606	1.1586	1.1596	1.1598	1.1611	1.1626	1.1636	1.1658	1.1675
	lysate	1.2959	1.2113	1.1942	1.1925	1.1934	1.1941	1.1946	1.1957	1.1959	1.1969	1.1972	1.1977	1.1977	1.1971	1.1961	1.196	1.1952	1.1947	1.1943	1.1938	1.1933	1.1933	1.1943	1.1932	1.1932	1.1924	1.1921	1.1916	1.1922	1.1907	1.1915	1.1907	1.1912	1.1916	1.191	1.1905	1.1894	1.1911	1.1924	1.1913	1.1898	1.1909	1.1907	1.1919	1.1938	1.195	1.1967	1.1988
	MaserMix Only	1.4093	1.4006	1.3719	1.3639	1.3545	1.3502	1.3475	1.3453	1.3436	1.3436	1.3422	1.3421	1.3416	1.3405	1.3385	1.3389	1.3374	1.337	1.3361	1.3358	1.3354	1.3361	1.3356	1.3516	1.3347	1.3388	1.3415	1.3348	1.3337	1.3331	1.3331	1.3402	1.3323	1.3355	1.334	1.347	1.33	1.3335	1.3334	1.3335	1.3302	1.3315	1.3311	1.333	1.334	1.3353	1.336	1.3389
	MaserMix Only	1.39845	1.3922	1.3591	1.3504	1.3466	1.344	1.3417	1.3412	1.3396	1.3385	1.3382	1.3377	1.3372	1.3363	1.3349	1.3345	1.3337	1.3328	1.3323	1.3355	1.331	1.3359	1.3317	1.3329	1.3324	1.3319	1.3317	1.3316	1.3312	1.3309	1.3311	1.3307	1.3308	1.3303	1.331	1.3305	1.3283	1.3312	1.3319	1.3316	1.3295	1.3308	1.3298	1.3313	1.3328	1.3344	1.3357	1.3373
	MaserMix Only	1.4077	1.3996	1.3775	1.3662	1.3613	1.358	1.3544	1.3535	1.3515	1.351	1.3493	1.3499	1.3484	1.3476	1.3458	1.3459	1.344	1.344	1.3426	1.3416	1.3405	1.3425	1.3425	1.3419	1.3415	1.3416	1.3431	1.3418	1.3407	1.3398	1.3403	1.3445	1.3395	1.3399	1.3389	1.3383	1.3364	1.3392	1.3393	1.3392	1.3375	1.3381	1.3373	1.3392	1.3406	1.3422	1.3433	1.3456
[truncated: 50 more columns]

## Sheet: Average ∆Abs550
Trial 1
	Avg ∆Abs
	Time (min)	0	14.9998	29.9998	44.9998	59.9998	74.9998	89.9998	105	120	135	150	165	180	195	210	225	240	255	270	285	300	315	330	345	360	375	390	405	420	435	450	465	480	495	510	525	540	555	570	585	600	615	630	645	660	675	690	705
	Hours	0	0.249997	0.499997	0.749997	0.999997	1.25	1.5	1.75	2	2.25	2.5	2.75	3	3.25	3.5	3.75	4	4.25	4.5	4.75	5	5.25	5.5	5.75	6	6.25	6.5	6.75	7	7.25	7.5	7.75	8	8.25	8.5	8.75	9	9.25	9.5	9.75	10	10.25	10.5	10.75	11	11.25	11.5	11.75
1	T. fusca cutinase	0	0.292411	0.616378	0.703244	0.748211	0.767811	0.793811	0.804678	0.823244	0.828144	0.840578	0.842911	0.853411	0.853611	0.861378	0.860678	0.868911	0.867711	0.875944	0.875078	0.883344	0.881978	0.891378	0.889111	0.897478	0.896044	0.903344	0.902144	0.909978	0.907978	0.916478	0.915111	0.922711	0.921578	0.928711	0.927011	0.932778	0.933578	0.941511	0.939544	0.944711	0.944078	0.951278	0.950578	0.958644	0.958378	0.966444	0.966911
2	I. sakiensis PETase	0	0.636622	0.808356	0.830622	0.894289	0.908056	0.925356	0.935356	0.949656	0.959456	0.972456	0.980522	0.992289	0.998522	1.00686	1.01339	1.02179	1.02646	1.03422	1.03832	1.04549	1.04942	1.05762	1.05949	1.06569	1.06782	1.07262	1.07509	1.07932	1.08052	1.08526	1.08656	1.09062	1.09182	1.09512	1.09579	1.09719	1.10059	1.10392	1.10369	1.10439	1.10576	1.10819	1.10999	1.11406	1.11622	1.12022	1.12332
3	501	0	0.101728	0.194278	0.275994	0.290961	0.339794	0.347644	0.382394	0.378611	0.410828	0.404928	0.433944	0.421194	0.449494	0.434361	0.463344	0.447344	0.474094	0.457361	0.483428	0.466211	0.491378	0.470761	0.496461	0.477194	0.502061	0.481211	0.505528	0.483128	0.509361	0.489228	0.512744	0.490044	0.515744	0.493861	0.519411	0.495211	0.522944	0.502244	0.526444	0.500994	0.527944	0.504794	0.531711	0.509678	0.537511	0.512444	0.542361
4	702	0	0.323633	0.6364	0.733133	0.771333	0.802133	0.8256	0.8412	0.847167	0.857267	0.861567	0.8711	0.875233	0.8826	0.8844	0.8914	0.893667	0.899933	0.902133	0.908933	0.911367	0.917933	0.9219	0.9285	0.930167	0.936067	0.937067	0.943533	0.944	0.949533	0.950933	0.956367	0.9576	0.9632	0.9634	0.968967	0.9673	0.975367	0.976367	0.980533	0.978633	0.984167	0.9824	0.987433	0.986667	0.991733	0.9924	0.999333
5	703	0	0.3019	0.623767	0.721967	0.757867	0.775033	0.784133	0.7921	0.798767	0.805433	0.8124	0.8213	0.8327	0.842267	0.848333	0.854767	0.859633	0.863967	0.869033	0.873367	0.878167	0.8829	0.8896	0.892267	0.897433	0.9009	0.904633	0.9085	0.912267	0.9151	0.918967	0.922233	0.925333	0.928533	0.931233	0.9337	0.934633	0.939767	0.9431	0.944167	0.945133	0.9484	0.9505	0.953967	0.957567	0.960867	0.9642	0.9691
6	705	0	0.322956	0.333256	0.378256	0.401189	0.428822	0.444756	0.467456	0.480389	0.501522	0.509522	0.526922	0.530956	0.545122	0.545789	0.558622	0.558322	0.568689	0.567056	0.577356	0.574756	0.584022	0.582222	0.590022	0.585722	0.593989	0.588922	0.597356	0.591289	0.599122	0.593556	0.601789	0.596022	0.603456	0.597189	0.605289	0.596822	0.607522	0.601322	0.608689	0.599522	0.609056	0.601622	0.611522	0.605589	0.615222	0.608756	0.620456
7	707	0	0.303067	0.467333	0.508567	0.524533	0.5341	0.5391	0.547067	0.549533	0.5535	0.553733	0.553067	0.5569	0.5618	0.564667	0.569233	0.571767	0.574633	0.577433	0.579033	0.580567	0.5819	0.5838	0.5823	0.582733	0.581433	0.580533	0.580033	0.5788	0.5778	0.5779	0.5771	0.576533	0.5764	0.5758	0.575833	0.573367	0.5755	0.5763	0.5757	0.573633	0.5744	0.574867	0.5762	0.5777	0.579367	0.5809	0.584267
8	708	0	-0.159789	-0.0183889	0.000211111	0.00997778	0.0935444	0.0417444	0.135911	0.149444	0.167678	0.179444	0.187011	0.195578	0.201044	0.203578	0.214544	0.217344	0.228278	0.236878	0.248544	0.255244	0.264878	0.268144	0.279344	0.282178	0.288144	0.296411	0.298878	0.305511	0.308611	0.318511	0.321744	0.330378	0.332378	0.335178	0.342578	0.347711	0.354844	0.361578	0.364611	0.363844	0.373344	0.376311	0.385911	0.385711	0.392244	0.396944	0.406178
9	715	0	0.0671778	0.447311	0.542578	0.567611	0.582378	0.584544	0.588278	0.592211	0.596278	0.595611	0.602978	0.603811	0.610111	0.619244	0.621511	0.626978	0.637844	0.646544	0.646978	0.654711	0.657078	0.666111	0.666278	0.673744	0.677378	0.681744	0.685644	0.689944	0.695978	0.698411	0.703844	0.707878	0.713678	0.694078	0.696711	0.698078	0.705378	0.708078	0.710511	0.713644	0.717111	0.721311	0.724344	0.729578	0.734044	0.738811	0.741344
10	Geobacillus stearothermophilis esterase	0	0.650656	0.847056	0.975889	1.05379	1.10906	1.13319	1.15426	1.17176	1.18609	1.19626	1.20522	1.21226	1.21979	1.22232	1.22522	1.22759	1.23062	1.23422	1.23752	1.24059	1.24349	1.24776	1.24876	1.25119	1.25282	1.25469	1.25699	1.25846	1.26009	1.26206	1.26369	1.26519	1.26796	1.26886	1.27049	1.26999	1.27382	1.27552	1.27626	1.27542	1.27762	1.27846	1.28086	1.28292	1.28549	1.28719	1.29122
11	Bacillus subilis esterase	0	0.573722	0.789356	0.870156	0.893756	0.902889	0.906622	0.912156	0.915422	0.919356	0.922689	0.925656	0.928689	0.930789	0.931356	0.935489	0.938822	0.944689	0.950889	0.955289	0.958156	0.959622	0.963089	0.962822	0.964556	0.965322	0.966456	0.969422	0.967889	0.970156	0.970156	0.972722	0.972456	0.973722	0.972789	0.974556	0.972189	0.976122	0.975156	0.975889	0.973689	0.975089	0.975289	0.976556	0.978122	0.979689	0.981089	0.984422
12	Aspergilis oryzae lipase	0	0.148933	0.273767	0.289033	0.289867	0.290733	0.291567	0.293967	0.2974	0.2997	0.301967	0.305767	0.307167	0.310733	0.310867	0.313567	0.316267	0.317833	0.320367	0.3228	0.3255	0.327933	0.3345	0.336933	0.3431	0.3497	0.355667	0.362	0.3671	0.3724	0.376967	0.380933	0.3848	0.389133	0.392	0.396	0.397533	0.403533	0.407067	0.409533	0.411067	0.423067	0.4254	0.429133	0.432833	0.4367	0.4402	0.445333
13	Candita antarctica lipase A	0	0.246567	0.3489	0.372167	0.3778	0.380933	0.382967	0.387533	0.390567	0.3953	0.397667	0.401367	0.4009	0.402633	0.400833	0.402367	0.402667	0.401067	0.4038	0.404	0.4039	0.4044	0.407	0.4057	0.406833	0.407433	0.407733	0.4087	0.408867	0.408967	0.409433	0.4101	0.410467	0.411333	0.411767	0.412367	0.410733	0.414333	0.415667	0.415933	0.4147	0.416733	0.416833	0.419667	0.421533	0.424167	0.426133	0.4305
14	Candita antarctica lipase B	0	0.321833	0.615	0.717967	0.7618	0.7785	0.784767	0.787367	0.788567	0.7906	0.790367	0.791167	0.7919	0.791333	0.7909	0.7909	0.7909	0.790667	0.7908	0.791067	0.7919	0.7924	0.795067	0.7945	0.795167	0.795267	0.795767	0.7965	0.7966	0.796933	0.798	0.7987	0.799133	0.799967	0.8001	0.800833	0.798933	0.8027	0.803567	0.803733	0.802233	0.804167	0.804633	0.8064	0.8081	0.810467	0.811833	0.815533
15	Rhizopus oryzae esterase	0	0.451733	0.376933	0.3804	0.3756	0.371167	0.3713	0.369633	0.378433	0.3766	0.3769	0.376267	0.376733	0.377133	0.376867	0.375667	0.3762	0.374433	0.3746	0.373367	0.3732	0.372133	0.373333	0.373267	0.3721	0.372067	0.3704	0.369633	0.369433	0.367833	0.367333	0.3665	0.367067	0.365467	0.3655	0.363933	0.3631	0.3601	0.362233	0.361067	0.360533	0.357133	0.358033	0.356667	0.357267	0.357467	0.358533	0.357667
16	Aspergilis oryzae phospholipase	0	0.136667	0.140467	0.163167	0.144267	0.152833	0.179467	0.209133	0.209367	0.209533	0.2132	0.215767	0.216367	0.218067	0.2183	0.220233	0.220167	0.223	0.223867	0.225967	0.227467	0.230067	0.233667	0.234867	0.236067	0.238433	0.238867	0.242867	0.243433	0.245167	0.248133	0.249367	0.251533	0.2542	0.255567	0.2578	0.257833	0.2631	0.264967	0.267367	0.266467	0.2697	0.2719	0.2753	0.279333	0.281767	0.285633	0.290667
17	Pseudomonas sp. lipoprotein lipase	0	0.4309	0.790267	0.791533	0.801133	0.807667	0.7997	0.795533	0.795133	0.7986	0.801433	0.807633	0.812267	0.8175	0.821067	0.826333	0.83	0.833733	0.838367	0.841733	0.844633	0.847733	0.852567	0.854433	0.8572	0.859467	0.861867	0.864333	0.866233	0.8675	0.87	0.870933	0.8728	0.874067	0.875	0.875867	0.874667	0.877733	0.878967	0.879067	0.8775	0.878533	0.879367	0.880567	0.882233	0.8839	0.885067	0.8882
18	Bovine pancreas phospholipase	0	0.154033	0.2877	0.325267	0.329533	0.333367	0.334167	0.337367	0.339367	0.3459	0.3557	0.368167	0.377133	0.382167	0.387	0.392633	0.3966	0.399467	0.402133	0.404167	0.406133	0.4088	0.412133	0.413	0.4148	0.415967	0.417033	0.418967	0.419833	0.420733	0.422767	0.423867	0.425167	0.4267	0.428133	0.429233	0.428467	0.432733	0.4347	0.435833	0.433533	0.4364	0.437133	0.4399	0.442067	0.4451	0.446767	0.451467
	lysate	0	0.212367	0.306133	0.3341	0.345267	0.3513	0.355967	0.361367	0.3656	0.371867	0.382667	0.388767	0.3935	0.3969	0.3998	0.403633	0.4073	0.410033	0.413233	0.416333	0.419167	0.422433	0.427133	0.428833	0.431667	0.434333	0.4365	0.4396	0.442733	0.444667	0.4478	0.450433	0.4537	0.456533	0.458267	0.4608	0.461333	0.4664	0.469333	0.470833	0.471033	0.473933	0.4759	0.478833	0.482067	0.485033	0.488267	0.4927
	MasterMix+BHET	0	0.192317	0.287317	0.276817	0.275017	0.280717	0.314517	0.322183	0.32085	0.32805	0.328117	0.331817	0.33275	0.333283	0.332617	0.333983	0.333283	0.334317	0.33435	0.336417	0.33585	0.339817	0.339983	0.34605	0.341117	0.34385	0.34615	0.345283	0.34555	0.347083	0.34915	0.35545	0.353283	0.356817	0.35795	0.364217	0.358383	0.36335	0.365117	0.366717	0.365483	0.367983	0.36815	0.371017	0.37335	0.376583	0.37845	0.382517
	MaserMix No BHET	0	-0.0218733	0.15836	0.172793	0.177627	0.196193	0.228793	0.235427	0.24046	0.24766	0.249993	0.252727	0.253693	0.255193	0.25596	0.257193	0.25756	0.25826	0.259893	0.262527	0.26556	0.268727	0.272293	0.27336	0.27536	0.27736	0.278193	0.27996	0.280827	0.281593	0.282227	0.28336	0.284027	0.28486	0.285793	0.286693	0.286927	0.287793	0.288227	0.288593	0.289093	0.28956	0.289893	0.290327	0.290693	0.291627	0.291693	0.29286
Trial 2
	Time (min)	0	14.9998	29.9998	44.9998	59.9998	74.9998	89.9998	105	120	135	150	165	180	195	210	225	240	255	270	285	300	315	330	345	360	375	390	405	420	435	450	465	480	495	510	525	540	555	570	585	600	615	630	645	660	675	690	705
	Hours	0	0.249997	0.499997	0.749997	0.999997	1.25	1.5	1.75	2	2.25	2.5	2.75	3	3.25	3.5	3.75	4	4.25	4.5	4.75	5	5.25	5.5	5.75	6	6.25	6.5	6.75	7	7.25	7.5	7.75	8	8.25	8.5	8.75	9	9.25	9.5	9.75	10	10.25	10.5	10.75	11	11.25	11.5	11.75
1	T. fusca cutinase	0	0.154678	0.402811	0.469578	0.513778	0.522344	0.537544	0.538111	0.553111	0.550778	0.565311	0.562911	0.576378	0.573178	0.589111	0.586811	0.601344	0.598678	0.613144	0.609311	0.623878	0.619444	0.634644	0.629344	0.642178	0.637244	0.650344	0.644478	0.657344	0.651178	0.664711	0.659111	0.672078	0.665644	0.677778	0.671911	0.682944	0.677978	0.692044	0.684878	0.694911	0.688311	0.701211	0.695644	0.709244	0.703544	0.717044	0.711111
2	I. sakiensis PETase	0	0.472022	0.549189	0.572322	0.601822	0.628822	0.659322	0.672156	0.693022	0.700922	0.719422	0.725089	0.740689	0.743456	0.757022	0.758989	0.771456	0.772122	0.783856	0.783389	0.794022	0.793456	0.804789	0.802389	0.812189	0.809322	0.818756	0.816256	0.824389	0.820556	0.829456	0.825922	0.833422	0.829756	0.836822	0.832922	0.838356	0.836289	0.844222	0.839322	0.843922	0.839922	0.846822	0.844256	0.852456	0.849889	0.857922	0.855456
3	501	0	0.0743778	0.196244	0.280811	0.323311	0.354911	0.385278	0.396478	0.416278	0.429111	0.448911	0.457078	0.470111	0.477778	0.488944	0.497378	0.507611	0.513478	0.523278	0.529111	0.537411	0.542544	0.548478	0.552678	0.559344	0.562311	0.568678	0.570878	0.574744	0.577511	0.583078	0.585144	0.587744	0.590078	0.594111	0.596611	0.598378	0.596144	0.599811	0.595111	0.600111	0.596244	0.604878	0.603244	0.612211	0.609744	0.616811	0.616678
4	702	0	0.1744	0.4217	0.509133	0.5447	0.5641	0.573233	0.5868	0.599133	0.611667	0.620667	0.633067	0.638133	0.645633	0.649467	0.655733	0.658867	0.664767	0.668	0.6738	0.676733	0.6827	0.6866	0.6931	0.695467	0.700433	0.7028	0.708267	0.709467	0.7146	0.7168	0.721633	0.723767	0.728333	0.729633	0.734567	0.734067	0.741133	0.743467	0.7472	0.746133	0.7517	0.752	0.757867	0.7589	0.763867	0.766267	0.771867
5	703	0	0.169533	0.422033	0.4962	0.527267	0.535667	0.548867	0.558733	0.566967	0.574433	0.581833	0.587467	0.5936	0.597233	0.603267	0.608533	0.6124	0.617233	0.621867	0.625833	0.630433	0.634367	0.6403	0.642433	0.647833	0.6506	0.654667	0.657967	0.661633	0.664533	0.668833	0.672	0.6758	0.6792	0.682933	0.6861	0.688167	0.692767	0.696833	0.697433	0.698367	0.7013	0.7032	0.7062	0.709567	0.711767	0.715233	0.718233
6	705	0	0.145789	0.237122	0.272689	0.291056	0.301489	0.313356	0.326456	0.342689	0.358289	0.372922	0.381089	0.389456	0.395389	0.403222	0.408756	0.414856	0.419822	0.426422	0.430556	0.436156	0.441056	0.447389	0.450689	0.456722	0.460122	0.465156	0.469022	0.473189	0.476356	0.481589	0.484589	0.488822	0.491389	0.495789	0.498489	0.500856	0.505389	0.510522	0.512289	0.513656	0.517122	0.520456	0.523989	0.528789	0.532622	0.536722	0.540389
7	707	0	0.1489	0.201	0.221267	0.243667	0.2605	0.268767	0.277333	0.2792	0.283267	0.283667	0.283833	0.2855	0.2884	0.290367	0.295333	0.299267	0.303	0.307533	0.312133	0.316267	0.3208	0.3264	0.329633	0.334033	0.337367	0.341267	0.345267	0.348133	0.351333	0.355133	0.358167	0.3611	0.363767	0.365967	0.368433	0.368733	0.3728	0.376067	0.3772	0.3769	0.3802	0.381733	0.3854	0.3882	0.3916	0.394233	0.397633
8	708	0	0.152744	0.230511	0.268411	0.285278	0.297578	0.307911	0.317944	0.327744	0.343311	0.354444	0.363011	0.373644	0.384544	0.392644	0.400178	0.406678	0.412678	0.418478	0.424178	0.428811	0.434778	0.440911	0.445011	0.450511	0.454578	0.459011	0.463644	0.467644	0.471411	0.476244	0.480078	0.483511	0.487778	0.491211	0.494578	0.496211	0.501911	0.506311	0.508944	0.509944	0.514344	0.516878	0.521544	0.525711	0.529978	0.533878	0.538611
9	715	0	0.140344	0.426811	0.508811	0.537478	0.548611	0.551378	0.556611	0.560978	0.564744	0.567778	0.574544	0.577444	0.581778	0.586978	0.591944	0.596911	0.601644	0.606778	0.611444	0.616111	0.620711	0.626811	0.630278	0.635111	0.638644	0.642844	0.647011	0.650144	0.653711	0.658378	0.661878	0.665511	0.669111	0.672878	0.676311	0.678511	0.684878	0.689611	0.691878	0.691878	0.695244	0.696911	0.700344	0.703478	0.706978	0.710444	0.714144
10	Geobacillus stearothermophilis esterase	0	0.438322	0.623689	0.721222	0.769956	0.811589	0.852056	0.865589	0.879422	0.897156	0.909389	0.920589	0.928022	0.934822	0.939656	0.945089	0.948522	0.951689	0.954656	0.957422	0.961656	0.964756	0.967756	0.969122	0.971222	0.972189	0.973522	0.975289	0.975622	0.977256	0.978856	0.979656	0.980189	0.981256	0.981389	0.982822	0.981489	0.984689	0.986222	0.986656	0.985222	0.987422	0.987256	0.990056	0.991989	0.994056	0.995489	0.998656
11	Bacillus subilis esterase	0	0.233856	0.454822	0.544856	0.577289	0.594356	0.605989	0.615556	0.620856	0.626522	0.629656	0.634122	0.637256	0.639589	0.641656	0.644889	0.647522	0.650822	0.653856	0.656389	0.658289	0.661889	0.664856	0.666989	0.669622	0.671922	0.674689	0.677656	0.679022	0.681656	0.683889	0.686322	0.687589	0.689389	0.690889	0.693156	0.693122	0.697322	0.699722	0.701122	0.700656	0.703889	0.704756	0.708489	0.711422	0.714289	0.717022	0.720522
12	Aspergilis oryzae lipase	0	0.0095	0.0464667	0.0540667	0.0680333	0.0702667	0.0714667	0.0733	0.0731667	0.0757	0.0771333	0.0785333	0.0795	0.0795333	0.0808	0.0820333	0.0829	0.0834333	0.0848	0.0858667	0.0864333	0.0884667	0.0909	0.0908667	0.0929667	0.0934333	0.0942667	0.0959333	0.0967667	0.0975333	0.0992667	0.1009	0.101233	0.102733	0.103367	0.104633	0.104333	0.1078	0.109867	0.110633	0.1101	0.112367	0.113	0.1163	0.118833	0.121533	0.123833	0.126867
13	Candita antarctica lipase A	0	0.0244	0.0629333	0.0723667	0.0742	0.0755333	0.0756333	0.0771667	0.0777	0.0789	0.0799667	0.0805	0.0792333	0.0792	0.0782667	0.0786667	0.0779	0.0783333	0.0782	0.078	0.0780667	0.0785667	0.0796667	0.0794	0.0798667	0.0795	0.0797	0.0808333	0.0802333	0.0802	0.0813	0.0817667	0.0817333	0.0827	0.0826	0.0831667	0.0814	0.0846333	0.0859	0.086	0.0843	0.0861667	0.0860333	0.0885	0.0904	0.0923667	0.0939333	0.0965
14	Candita antarctica lipase B	0	0.00373333	0.110267	0.1718	0.204333	0.2293	0.251233	0.271033	0.2885	0.3057	0.319333	0.332567	0.343467	0.3526	0.3611	0.368867	0.375367	0.380933	0.385867	0.3906	0.394733	0.398567	0.4027	0.405167	0.407933	0.409433	0.411867	0.413467	0.414467	0.415933	0.417833	0.418933	0.419467	0.4207	0.421	0.4219	0.420433	0.423767	0.425267	0.4255	0.424	0.425967	0.4252	0.427167	0.4289	0.430933	0.432333	0.434567
15	Rhizopus oryzae esterase	0	-0.2626	-0.2978	-0.3066	-0.313767	-0.321967	-0.326	-0.328933	-0.328967	-0.331667	-0.335	-0.3372	-0.339933	-0.342233	-0.344433	-0.348	-0.349667	-0.352233	-0.354533	-0.356867	-0.358767	-0.3618	-0.3631	-0.3645	-0.366067	-0.368033	-0.369633	-0.371567	-0.373333	-0.374967	-0.377167	-0.377933	-0.379567	-0.3814	-0.3827	-0.384567	-0.386	-0.389267	-0.387867	-0.388633	-0.390467	-0.393767	-0.394333	-0.395467	-0.394933	-0.394733	-0.395	-0.3952
16	Aspergilis oryzae phospholipase	0	-0.05	0.0108333	0.0242333	0.00786667	-0.0313667	-0.0386333	-0.0325	-0.0302667	-0.0308	-0.0347667	-0.0304667	-0.0326333	-0.0323333	-0.0339333	-0.0324	-0.0336333	-0.0347667	-0.0317667	-0.0314	-0.0284	-0.0278333	-0.0254333	-0.0248333	-0.0234667	-0.0233333	-0.023	-0.021	-0.0201667	-0.0189667	-0.0172	-0.0155667	-0.0156667	-0.0141667	-0.0131333	-0.012	-0.0122	-0.00816667	-0.00673333	-0.00523333	-0.00636667	-0.00333333	-0.003	0.000566667	0.0032	0.00153333	0.00783333	0.0119667
17	Pseudomonas sp. lipoprotein lipase	0	0.3511	0.5567	0.560067	0.568467	0.575733	0.571967	0.579667	0.582733	0.582433	0.5835	0.590633	0.594267	0.599267	0.603733	0.6088	0.611733	0.6161	0.620033	0.623433	0.6271	0.630733	0.634367	0.6372	0.639867	0.641167	0.643967	0.6459	0.6476	0.649133	0.651533	0.652067	0.6535	0.654267	0.655033	0.6558	0.654	0.656867	0.658467	0.658533	0.6567	0.6579	0.6578	0.659467	0.660767	0.662333	0.663	0.664933
18	Bovine pancreas phospholipase	0	-0.0225667	0.0529667	0.0846	0.0926	0.0952667	0.0962667	0.0976333	0.0991667	0.1024	0.103133	0.105467	0.106633	0.108033	0.108667	0.110267	0.110767	0.1118	0.112967	0.113433	0.113967	0.115933	0.117533	0.118433	0.119967	0.120233	0.121333	0.1228	0.123067	0.1245	0.125633	0.1267	0.1273	0.1294	0.129833	0.130667	0.1298	0.133567	0.1355	0.137033	0.1345	0.137133	0.137233	0.140233	0.142333	0.1448	0.146333	0.150233
	lysate	0	0.0872	0.1224	0.131267	0.138933	0.1429	0.145167	0.148	0.149167	0.151767	0.1528	0.154867	0.155033	0.155733	0.1557	0.1566	0.157	0.1574	0.157833	0.158367	0.158833	0.159767	0.161367	0.161467	0.162233	0.162633	0.1631	0.1641	0.164833	0.1654	0.166733	0.167733	0.1689	0.1702	0.1707	0.1723	0.171833	0.175767	0.1787	0.179867	0.180033	0.183633	0.185433	0.189433	0.1937	0.197067	0.2007	0.204667
	MasterMix+BHET	0	0.0923167	0.12925	0.0774833	0.0432833	0.0228167	0.0157167	0.03015	0.0333833	0.03395	0.0364167	0.03905	0.0395833	0.0399833	0.0402167	0.0416167	0.04155	0.04235	0.04235	0.0441833	0.04345	0.0471833	0.0464167	0.05275	0.0483167	0.0501167	0.0525833	0.05045	0.0505833	0.0509833	0.05185	0.0561833	0.0526833	0.0544833	0.0543167	0.0589833	0.0529833	0.05645	0.0575167	0.05805	0.05655	0.0582833	0.05795	0.0606167	0.0626833	0.0649167	0.0662833	0.06925
	MaserMix No BHET	0	0.00171667	0.11135	0.115417	0.114783	0.114517	0.11585	0.126917	0.139783	0.143283	0.147883	0.15305	0.15765	0.160417	0.162217	0.163983	0.164817	0.166617	0.16755	0.16865	0.169117	0.16985	0.170617	0.17125	0.17165	0.17215	0.172883	0.173483	0.17355	0.17465	0.17475	0.175383	0.175517	0.176017	0.17625	0.176717	0.17715	0.177383	0.177717	0.177883	0.178283	0.178917	0.178717	0.179517	0.17965	0.18015	0.179783	0.180317
Average
	Time (min)	0	14.9998	29.9998	44.9998	59.9998	74.9998	89.9998	105	120	135	150	165	180	195	210	225	240	255	270	285	300	315	330	345	360	375	390	405	420	435	450	465	480	495	510	525	540	555	570	585	600	615	630	645	660	675	690	705
	Hours	0	0.249997	0.499997	0.749997	0.999997	1.25	1.5	1.75	2	2.25	2.5	2.75	3	3.25	3.5	3.75	4	4.25	4.5	4.75	5	5.25	5.5	5.75	6	6.25	6.5	6.75	7	7.25	7.5	7.75	8	8.25	8.5	8.75	9	9.25	9.5	9.75	10	10.25	10.5	10.75	11	11.25	11.5	11.75
1	T. fusca cutinase	0	0.223544	0.509594	0.586411	0.630994	0.645078	0.665678	0.671394	0.688178	0.689461	0.702944	0.702911	0.714894	0.713394	0.725244	0.723744	0.735128	0.733194	0.744544	0.742194	0.753611	0.750711	0.763011	0.759228	0.769828	0.766644	0.776844	0.773311	0.783661	0.779578	0.790594	0.787111	0.797394	0.793611	0.803244	0.799461	0.807861	0.805778	0.816778	0.812211	0.819811	0.816194	0.826244	0.823111	0.833944	0.830961	0.841744	0.839011
2	I. sakiensis PETase	0	0.554322	0.678772	0.701472	0.748056	0.768439	0.792339	0.803756	0.821339	0.830189	0.845939	0.852806	0.866489	0.870989	0.881939	0.886189	0.896622	0.899289	0.909039	0.910856	0.919756	0.921439	0.931206	0.930939	0.938939	0.938572	0.945689	0.945672	0.951856	0.950539	0.957356	0.956239	0.962022	0.960789	0.965972	0.964356	0.967772	0.968439	0.974072	0.971506	0.974156	0.972839	0.977506	0.977122	0.983256	0.983056	0.989072	0.989389
3	501	0	0.0880528	0.195261	0.278403	0.307136	0.347353	0.366461	0.389436	0.397444	0.419969	0.426919	0.445511	0.445653	0.463636	0.461653	0.480361	0.477478	0.493786	0.490319	0.506269	0.501811	0.516961	0.509619	0.524569	0.518269	0.532186	0.524944	0.538203	0.528936	0.543436	0.536153	0.548944	0.538894	0.552911	0.543986	0.558011	0.546794	0.559544	0.551028	0.560778	0.550553	0.562094	0.554836	0.567478	0.560944	0.573628	0.564628	0.579519
4	702	0	0.249017	0.52905	0.621133	0.658017	0.683117	0.699417	0.714	0.72315	0.734467	0.741117	0.752083	0.756683	0.764117	0.766933	0.773567	0.776267	0.78235	0.785067	0.791367	0.79405	0.800317	0.80425	0.8108	0.812817	0.81825	0.819933	0.8259	0.826733	0.832067	0.833867	0.839	0.840683	0.845767	0.846517	0.851767	0.850683	0.85825	0.859917	0.863867	0.862383	0.867933	0.8672	0.87265	0.872783	0.8778	0.879333	0.8856
5	703	0	0.235717	0.5229	0.609083	0.642567	0.65535	0.6665	0.675417	0.682867	0.689933	0.697117	0.704383	0.71315	0.71975	0.7258	0.73165	0.736017	0.7406	0.74545	0.7496	0.7543	0.758633	0.76495	0.76735	0.772633	0.77575	0.77965	0.783233	0.78695	0.789817	0.7939	0.797117	0.800567	0.803867	0.807083	0.8099	0.8114	0.816267	0.819967	0.8208	0.82175	0.82485	0.82685	0.830083	0.833567	0.836317	0.839717	0.843667
6	705	0	0.234372	0.285189	0.325472	0.346122	0.365156	0.379056	0.396956	0.411539	0.429906	0.441222	0.454006	0.460206	0.470256	0.474506	0.483689	0.486589	0.494256	0.496739	0.503956	0.505456	0.512539	0.514806	0.520356	0.521222	0.527056	0.527039	0.533189	0.532239	0.537739	0.537572	0.543189	0.542422	0.547422	0.546489	0.551889	0.548839	0.556456	0.555922	0.560489	0.556589	0.563089	0.561039	0.567756	0.567189	0.573922	0.572739	0.580422
7	707	0	0.225983	0.334167	0.364917	0.3841	0.3973	0.403933	0.4122	0.414367	0.418383	0.4187	0.41845	0.4212	0.4251	0.427517	0.432283	0.435517	0.438817	0.442483	0.445583	0.448417	0.45135	0.4551	0.455967	0.458383	0.4594	0.4609	0.46265	0.463467	0.464567	0.466517	0.467633	0.468817	0.470083	0.470883	0.472133	0.47105	0.47415	0.476183	0.47645	0.475267	0.4773	0.4783	0.4808	0.48295	0.485483	0.487567	0.49095
8	708	0	-0.00352222	0.106061	0.134311	0.147628	0.195561	0.174828	0.226928	0.238594	0.255494	0.266944	0.275011	0.284611	0.292794	0.298111	0.307361	0.312011	0.320478	0.327678	0.336361	0.342028	0.349828	0.354528	0.362178	0.366344	0.371361	0.377711	0.381261	0.386578	0.390011	0.397378	0.400911	0.406944	0.410078	0.413194	0.418578	0.421961	0.428378	0.433944	0.436778	0.436894	0.443844	0.446594	0.453728	0.455711	0.461111	0.465411	0.472394
9	715	0	0.103761	0.437061	0.525694	0.552544	0.565494	0.567961	0.572444	0.576594	0.580511	0.581694	0.588761	0.590628	0.595944	0.603111	0.606728	0.611944	0.619744	0.626661	0.629211	0.635411	0.638894	0.646461	0.648278	0.654428	0.658011	0.662294	0.666328	0.670044	0.674844	0.678394	0.682861	0.686694	0.691394	0.683478	0.686511	0.688294	0.695128	0.698844	0.701194	0.702761	0.706178	0.709111	0.712344	0.716528	0.720511	0.724628	0.727744
10	Geobacillus stearothermophilis esterase	0	0.544489	0.735372	0.848556	0.911872	0.960322	0.992622	1.00992	1.02559	1.04162	1.05282	1.06291	1.07014	1.07731	1.08099	1.08516	1.08806	1.09116	1.09444	1.09747	1.10112	1.10412	1.10776	1.10894	1.11121	1.11251	1.11411	1.11614	1.11704	1.11867	1.12046	1.12167	1.12269	1.12461	1.12512	1.12666	1.12574	1.12926	1.13087	1.13146	1.13032	1.13252	1.13286	1.13546	1.13746	1.13977	1.14134	1.14494
11	Bacillus subilis esterase	0	0.403789	0.622089	0.707506	0.735522	0.748622	0.756306	0.763856	0.768139	0.772939	0.776172	0.779889	0.782972	0.785189	0.786506	0.790189	0.793172	0.797756	0.802372	0.805839	0.808222	0.810756	0.813972	0.814906	0.817089	0.818622	0.820572	0.823539	0.823456	0.825906	0.827022	0.829522	0.830022	0.831556	0.831839	0.833856	0.832656	0.836722	0.837439	0.838506	0.837172	0.839489	0.840022	0.842522	0.844772	0.846989	0.849056	0.852472
12	Aspergilis oryzae lipase	0	0.0792167	0.160117	0.17155	0.17895	0.1805	0.181517	0.183633	0.185283	0.1877	0.18955	0.19215	0.193333	0.195133	0.195833	0.1978	0.199583	0.200633	0.202583	0.204333	0.205967	0.2082	0.2127	0.2139	0.218033	0.221567	0.224967	0.228967	0.231933	0.234967	0.238117	0.240917	0.243017	0.245933	0.247683	0.250317	0.250933	0.255667	0.258467	0.260083	0.260583	0.267717	0.2692	0.272717	0.275833	0.279117	0.282017	0.2861
13	Candita antarctica lipase A	0	0.135483	0.205917	0.222267	0.226	0.228233	0.2293	0.23235	0.234133	0.2371	0.238817	0.240933	0.240067	0.240917	0.23955	0.240517	0.240283	0.2397	0.241	0.241	0.240983	0.241483	0.243333	0.24255	0.24335	0.243467	0.243717	0.244767	0.24455	0.244583	0.245367	0.245933	0.2461	0.247017	0.247183	0.247767	0.246067	0.249483	0.250783	0.250967	0.2495	0.25145	0.251433	0.254083	0.255967	0.258267	0.260033	0.2635
14	Candita antarctica lipase B	0	0.162783	0.362633	0.444883	0.483067	0.5039	0.518	0.5292	0.538533	0.54815	0.55485	0.561867	0.567683	0.571967	0.576	0.579883	0.583133	0.5858	0.588333	0.590833	0.593317	0.595483	0.598883	0.599833	0.60155	0.60235	0.603817	0.604983	0.605533	0.606433	0.607917	0.608817	0.6093	0.610333	0.61055	0.611367	0.609683	0.613233	0.614417	0.614617	0.613117	0.615067	0.614917	0.616783	0.6185	0.6207	0.622083	0.62505
15	Rhizopus oryzae esterase	0	0.0945667	0.0395667	0.0369	0.0309167	0.0246	0.02265	0.02035	0.0247333	0.0224667	0.02095	0.0195333	0.0184	0.01745	0.0162167	0.0138333	0.0132667	0.0111	0.0100333	0.00825	0.00721667	0.00516667	0.00511667	0.00438333	0.00301667	0.00201667	0.000383333	-0.000966667	-0.00195	-0.00356667	-0.00491667	-0.00571667	-0.00625	-0.00796667	-0.0086	-0.0103167	-0.01145	-0.0145833	-0.0128167	-0.0137833	-0.0149667	-0.0183167	-0.01815	-0.0194	-0.0188333	-0.0186333	-0.0182333	-0.0187667
16	Aspergilis oryzae phospholipase	0	0.0433333	0.07565	0.0937	0.0760667	0.0607333	0.0704167	0.0883167	0.08955	0.0893667	0.0892167	0.09265	0.0918667	0.0928667	0.0921833	0.0939167	0.0932667	0.0941167	0.09605	0.0972833	0.0995333	0.101117	0.104117	0.105017	0.1063	0.10755	0.107933	0.110933	0.111633	0.1131	0.115467	0.1169	0.117933	0.120017	0.121217	0.1229	0.122817	0.127467	0.129117	0.131067	0.13005	0.133183	0.13445	0.137933	0.141267	0.14165	0.146733	0.151317
17	Pseudomonas sp. lipoprotein lipase	0	0.391	0.673483	0.6758	0.6848	0.6917	0.685833	0.6876	0.688933	0.690517	0.692467	0.699133	0.703267	0.708383	0.7124	0.717567	0.720867	0.724917	0.7292	0.732583	0.735867	0.739233	0.743467	0.745817	0.748533	0.750317	0.752917	0.755117	0.756917	0.758317	0.760767	0.7615	0.76315	0.764167	0.765017	0.765833	0.764333	0.7673	0.768717	0.7688	0.7671	0.768217	0.768583	0.770017	0.7715	0.773117	0.774033	0.776567
18	Bovine pancreas phospholipase	0	0.0657333	0.170333	0.204933	0.211067	0.214317	0.215217	0.2175	0.219267	0.22415	0.229417	0.236817	0.241883	0.2451	0.247833	0.25145	0.253683	0.255633	0.25755	0.2588	0.26005	0.262367	0.264833	0.265717	0.267383	0.2681	0.269183	0.270883	0.27145	0.272617	0.2742	0.275283	0.276233	0.27805	0.278983	0.27995	0.279133	0.28315	0.2851	0.286433	0.284017	0.286767	0.287183	0.290067	0.2922	0.29495	0.29655	0.30085
	lysate	0	0.149783	0.214267	0.232683	0.2421	0.2471	0.250567	0.254683	0.257383	0.261817	0.267733	0.271817	0.274267	0.276317	0.27775	0.280117	0.28215	0.283717	0.285533	0.28735	0.289	0.2911	0.29425	0.29515	0.29695	0.298483	0.2998	0.30185	0.303783	0.305033	0.307267	0.309083	0.3113	0.313367	0.314483	0.31655	0.316583	0.321083	0.324017	0.32535	0.325533	0.328783	0.330667	0.334133	0.337883	0.34105	0.344483	0.348683
	MasterMix+BHET	0	0.142317	0.208283	0.17715	0.15915	0.151767	0.165117	0.176167	0.177117	0.181	0.182267	0.185433	0.186167	0.186633	0.186417	0.1878	0.187417	0.188333	0.18835	0.1903	0.18965	0.1935	0.1932	0.1994	0.194717	0.196983	0.199367	0.197867	0.198067	0.199033	0.2005	0.205817	0.202983	0.20565	0.206133	0.2116	0.205683	0.2099	0.211317	0.212383	0.211017	0.213133	0.21305	0.215817	0.218017	0.22075	0.222367	0.225883
	MaserMix No BHET	0	-0.0100783	0.134855	0.144105	0.146205	0.155355	0.172322	0.181172	0.190122	0.195472	0.198938	0.202888	0.205672	0.207805	0.209088	0.210588	0.211188	0.212438	0.213722	0.215588	0.217338	0.219288	0.221455	0.222305	0.223505	0.224755	0.225538	0.226722	0.227188	0.228122	0.228488	0.229372	0.229772	0.230438	0.231022	0.231705	0.232038	0.232588	0.232972	0.233238	0.233688	0.234238	0.234305	0.234922	0.235172	0.235888	0.235738	0.236588
No Substrate Control
	Time (min)
	Hours
1	T. fusca cutinase	0	0.00695556	0.0183556	0.0230889	0.0213556	0.0248889	0.0230556	0.0256556	0.0237556	0.0272222	0.0245222	0.0275556	0.0253222	0.0291222	0.0277556	0.0309889	0.0289556	0.0328556	0.0306222	0.0342556	0.0322556	0.0355222	0.0317889	0.0357556	0.0329222	0.0366889	0.0346556	0.0381889	0.0354889	0.0395889	0.0360889	0.0396222	0.0367889	0.0401556	0.0375889	0.0411222	0.0396222	0.0406889	0.0369222	0.0404222	0.0396556	0.0416889	0.0386889	0.0406556	0.0363556	0.0380889	0.0337222	0.0350222
2	I. sakiensis PETase	0	0.0107778	0.0273778	0.0352444	0.0346111	0.0389444	0.0377111	0.0411444	0.0391444	0.0430778	0.0401778	0.0437111	0.0407778	0.0451778	0.0432778	0.0469111	0.0444778	0.0486444	0.0459444	0.0500111	0.0474111	0.0508111	0.0467444	0.0508778	0.0474444	0.0515111	0.0484444	0.0518444	0.0488444	0.0531111	0.0490778	0.0530444	0.0497111	0.0531111	0.0500444	0.0538778	0.0520111	0.0531111	0.0490778	0.0529111	0.0516444	0.0539778	0.0504111	0.0522778	0.0470778	0.0484778	0.0430444	0.0439778
3	501	0	-0.0554778	-0.127778	-0.174844	-0.178411	-0.198744	-0.198044	-0.205744	-0.199911	-0.208978	-0.204578	-0.212644	-0.204044	-0.213344	-0.203411	-0.215244	-0.206444	-0.216144	-0.207311	-0.218178	-0.209211	-0.219978	-0.209711	-0.220511	-0.211944	-0.222211	-0.213111	-0.222778	-0.212678	-0.223511	-0.215178	-0.225244	-0.214644	-0.225644	-0.216711	-0.227411	-0.216511	-0.229944	-0.222344	-0.231644	-0.220244	-0.231844	-0.222444	-0.234711	-0.226778	-0.238511	-0.228844	-0.243811
4	702	0	0.0053	0.0173333	0.0192667	0.0226	0.0232667	0.0262667	0.0245	0.0272	0.0252333	0.0283	0.0261	0.0284667	0.0278667	0.0312333	0.0306667	0.0335	0.0333333	0.0359	0.0351333	0.0375	0.0363667	0.0374	0.0350667	0.0374667	0.0364333	0.0387333	0.0372333	0.0399667	0.0386667	0.0403	0.0392	0.0408333	0.0394667	0.0418333	0.0402	0.0441	0.0399333	0.041	0.0399667	0.0441667	0.0409333	0.0432667	0.0404	0.0421333	0.0397333	0.0399667	0.0364
5	703	0	0.00793333	0.0228667	0.0273	0.0289667	0.0297667	0.0301	0.0302	0.0304667	0.0311667	0.0311	0.0316	0.0316	0.0327667	0.0337	0.0342	0.0347333	0.0358	0.0361	0.0372	0.0374	0.0378333	0.0365	0.0379	0.0371	0.0381667	0.0382667	0.0389	0.0386333	0.0397667	0.0388667	0.0396333	0.0395	0.04	0.0401	0.0409667	0.0422667	0.0404667	0.0392667	0.0407667	0.0422667	0.0416333	0.0413333	0.0404667	0.0388	0.0381333	0.0363	0.0345667
6	705	0	0.00807778	0.0227111	0.0275111	0.0299111	0.0321778	0.0338778	0.0355778	0.0367444	0.0375111	0.0372778	0.0376111	0.0379444	0.0390444	0.0398444	0.0401444	0.0408778	0.0418444	0.0420778	0.0429444	0.0433778	0.0436111	0.0428778	0.0436778	0.0434111	0.0440111	0.0441778	0.0444444	0.0449444	0.0456778	0.0450111	0.0458778	0.0457778	0.0462444	0.0462778	0.0467111	0.0483778	0.0464778	0.0454444	0.0463778	0.0485444	0.0475778	0.0474778	0.0465444	0.0449111	0.0439444	0.0426444	0.0407778
7	707	0	-0.0138	-0.0192	-0.0372	-0.0491667	-0.0556333	-0.0553333	-0.0561	-0.0504	-0.0465	-0.0406333	-0.0344	-0.0308	-0.0280333	-0.0244333	-0.0243333	-0.0234	-0.0222667	-0.0222	-0.0224333	-0.0222	-0.0227667	-0.0243	-0.0242333	-0.025	-0.0251667	-0.0255333	-0.0262667	-0.0263667	-0.0264667	-0.0275667	-0.0277667	-0.0281667	-0.0286667	-0.0287667	-0.0290333	-0.0276333	-0.0302	-0.0316333	-0.0314667	-0.0297333	-0.0311333	-0.0316667	-0.0331667	-0.0348667	-0.0366	-0.0382333	-0.0407667
8	708	0	0.00832222	0.0229556	0.0281222	0.0308222	0.0319222	0.0329556	0.0330556	0.0341556	0.0345889	0.0349889	0.0350889	0.0358222	0.0365556	0.0381222	0.0382889	0.0391889	0.0399222	0.0406556	0.0410222	0.0420556	0.0420222	0.0413556	0.0420556	0.0421556	0.0427889	0.0432556	0.0434222	0.0437222	0.0445556	0.0440556	0.0445556	0.0448889	0.0445222	0.0450222	0.0455556	0.0473222	0.0450556	0.0443556	0.0449889	0.0472222	0.0460556	0.0463556	0.0451556	0.0437222	0.0425889	0.0413889	0.0391889
10	715	0	-0.00184444	-0.00677778	-0.00707778	-0.00381111	-0.00154444	0.00488889	0.00798889	0.0124222	0.0171222	0.0212222	0.0222556	0.0257556	0.0282222	0.0298556	0.0308556	0.0316889	0.0328222	0.0334222	0.0340889	0.0348556	0.0352222	0.0340889	0.0350889	0.0348556	0.0355889	0.0359556	0.0357556	0.0362222	0.0369222	0.0362556	0.0367556	0.0367889	0.0369222	0.0371222	0.0374556	0.0392222	0.0370222	0.0362556	0.0368556	0.0392222	0.0380556	0.0378556	0.0367556	0.0352222	0.0339889	0.0325222	0.0303222
13	Geobacillus stearothermophilis esterase	0	0.00531111	0.0162444	0.0187444	0.0202444	0.0193111	0.0189111	0.0199111	0.0210778	0.0209778	0.0213778	0.0214778	0.0222444	0.0230444	0.0244111	0.0244778	0.0254778	0.0258444	0.0262111	0.0264111	0.0270778	0.0269778	0.0265111	0.0273111	0.0274778	0.0280778	0.0282778	0.0281444	0.0288444	0.0292444	0.0290444	0.0294111	0.0296778	0.0297444	0.0305111	0.0306444	0.0324111	0.0303444	0.0298778	0.0303111	0.0325111	0.0315111	0.0318111	0.0303444	0.0291778	0.0280444	0.0268444	0.0245444
14	Bacillus subilis esterase	0	-0.000388889	0.00884444	0.00364444	0.00304444	0.00304444	0.00294444	0.00107778	0.00197778	0.00214444	0.00251111	0.00247778	0.00274444	0.00394444	0.00577778	0.00607778	0.00674444	0.00697778	0.00751111	0.00767778	0.00887778	0.00847778	0.00821111	0.00907778	0.00934444	0.00961111	0.00977778	0.00937778	0.0103444	0.0106444	0.0105444	0.0104444	0.0106111	0.0108444	0.0117444	0.0117111	0.0136778	0.0114444	0.0112444	0.0116111	0.0137778	0.0127444	0.0130778	0.0115778	0.0102444	0.00914444	0.00791111	0.00577778
16	Aspergilis oryzae lipase	0	0.0936	0.108133	0.112767	0.1157	0.117667	0.119933	0.120433	0.121	0.122167	0.1226	0.1226	0.123233	0.124	0.125467	0.1257	0.126633	0.1274	0.128133	0.128567	0.1293	0.129	0.1284	0.129367	0.1294	0.1302	0.130633	0.130733	0.1312	0.1315	0.131033	0.131633	0.131833	0.1319	0.132567	0.132833	0.134633	0.132367	0.131833	0.132367	0.1344	0.1334	0.1337	0.132267	0.131067	0.130033	0.128667	0.126667
17	Candita antarctica lipase A	0	0.0750333	0.0897333	0.0941	0.0956667	0.0963	0.0971	0.0969333	0.0979	0.0980667	0.0986333	0.0983333	0.0991333	0.0997333	0.1013	0.101433	0.1024	0.103	0.103667	0.104133	0.104933	0.104767	0.1043	0.104967	0.105133	0.1058	0.106233	0.105767	0.106633	0.107233	0.106833	0.1072	0.107567	0.107333	0.108	0.108233	0.110233	0.107833	0.1073	0.107733	0.109967	0.108933	0.109167	0.107733	0.106533	0.105333	0.1043	0.101967
18	Candita antarctica lipase B	0	0.089	0.105233	0.111833	0.114	0.1167	0.119233	0.120967	0.122267	0.122633	0.1234	0.123667	0.1238	0.1253	0.126167	0.1265	0.127133	0.1282	0.128767	0.1291	0.129567	0.129633	0.128833	0.129433	0.129567	0.130167	0.130233	0.130433	0.1309	0.1314	0.130733	0.130933	0.131233	0.131133	0.1317	0.131733	0.1338	0.1311	0.130467	0.130633	0.132767	0.131467	0.131533	0.1303	0.129033	0.1276	0.126333	0.124233
20	Rhizopus oryzae esterase	0	0.689967	0.777933	0.7965	0.809233	0.820867	0.828867	0.835767	0.8397	0.845933	0.8509	0.8558	0.8602	0.865033	0.869567	0.874867	0.878867	0.8836	0.888133	0.892533	0.8966	0.901067	0.904767	0.907567	0.911433	0.914967	0.918933	0.922633	0.9259	0.9297	0.9333	0.9362	0.939533	0.942867	0.945967	0.949533	0.9526	0.957433	0.957867	0.960033	0.963433	0.968433	0.970033	0.973233	0.974333	0.975667	0.977233	0.978633
21	Aspergilis oryzae phospholipase	0	0.0927667	0.106533	0.110967	0.112867	0.1137	0.115133	0.115567	0.116667	0.116933	0.1174	0.1173	0.118067	0.118667	0.1201	0.1204	0.121333	0.121667	0.122367	0.122833	0.123367	0.1232	0.1226	0.123	0.123467	0.123833	0.1244	0.1243	0.124733	0.125267	0.124733	0.125233	0.125567	0.125467	0.126	0.126467	0.128033	0.125533	0.125267	0.125733	0.1279	0.126867	0.127	0.125533	0.123567	0.123467	0.121933	0.119733
22	Pseudomonas sp. lipoprotein lipase	0	0.0137333	0.0319333	0.0434333	0.0517333	0.0583333	0.0712333	0.0751333	0.0810667	0.0859	0.0899	0.0920667	0.0951	0.0970667	0.0998	0.1011	0.103633	0.1053	0.106833	0.108567	0.110067	0.1105	0.1106	0.111933	0.112867	0.114133	0.1147	0.115367	0.116233	0.1175	0.117233	0.118567	0.1189	0.1195	0.120433	0.121233	0.1236	0.1219	0.121567	0.122133	0.124933	0.124833	0.1249	0.124467	0.123667	0.1229	0.1222	0.120267
23	Bovine pancreas phospholipase	0	0.0824667	0.0953667	0.100167	0.103667	0.106633	0.1102	0.111667	0.1134	0.114567	0.115267	0.115633	0.116533	0.117467	0.119033	0.1197	0.120867	0.1218	0.122867	0.1237	0.124667	0.124733	0.1243	0.125367	0.125567	0.1264	0.127067	0.127233	0.128167	0.1286	0.128633	0.1291	0.129567	0.129367	0.130033	0.130833	0.132733	0.130333	0.129567	0.129367	0.133133	0.131833	0.132467	0.131067	0.130167	0.129033	0.1281	0.1256
	lysate	0	0.0963667	0.111067	0.1128	0.112633	0.1121	0.112233	0.111167	0.111367	0.110667	0.110467	0.109733	0.109767	0.110267	0.1113	0.1112	0.111667	0.112367	0.1129	0.1132	0.113967	0.113867	0.113267	0.113833	0.114167	0.114567	0.1154	0.115233	0.1154	0.116233	0.115833	0.116167	0.115933	0.1158	0.1167	0.116633	0.118433	0.115933	0.115167	0.115467	0.1175	0.1165	0.1164	0.1152	0.113633	0.112433	0.110633	0.108667
	Master Mix Only	0	0.00768333	0.03565	0.0449833	0.0510167	0.0544167	0.0572833	0.0584833	0.06025	0.0607833	0.0619167	0.0619167	0.06275	0.0636833	0.0654167	0.0653833	0.0667833	0.0672167	0.06815	0.0675167	0.0695167	0.0669833	0.06855	0.0630167	0.06895	0.0677167	0.0663833	0.0690833	0.06995	0.07055	0.0703167	0.0666833	0.07095	0.0699167	0.0705167	0.06655	0.0735833	0.0705167	0.0702833	0.0703833	0.07275	0.0716833	0.0724167	0.07065	0.06935	0.06785	0.0668167	0.06455
[truncated: 50 more columns]

## Sheet: µmol Indicator Protonated
Trial 1
	Time (min)	0	14.9998	29.9998	44.9998	59.9998	74.9998	89.9998	105	120	135	150	165	180	195	210	225	240	255	270	285	300	315	330	345	360	375	390	405	420	435	450	465	480	495	510	525	540	555	570	585	600	615	630	645	660	675	690	705
1	T. fusca cutinase	0	0.00200517	0.00422672	0.0048224	0.00513075	0.00526515	0.00544345	0.00551796	0.00564528	0.00567888	0.00576414	0.00578014	0.00585214	0.00585352	0.00590677	0.00590197	0.00595843	0.0059502	0.00600666	0.00600072	0.00605741	0.00604804	0.00611249	0.00609695	0.00615432	0.0061445	0.00619455	0.00618633	0.00624004	0.00622633	0.00628461	0.00627524	0.00632736	0.00631959	0.0063685	0.00635685	0.00639639	0.00640188	0.00645628	0.00644279	0.00647822	0.00647388	0.00652325	0.00651845	0.00657377	0.00657194	0.00662725	0.00663045
2	I. sakiensis PETase	0	0.00436555	0.00554318	0.00569587	0.00613246	0.00622686	0.00634549	0.00641407	0.00651213	0.00657933	0.00666847	0.00672379	0.00680448	0.00684722	0.00690437	0.00694917	0.00700677	0.00703877	0.00709203	0.00712015	0.00716929	0.00719626	0.00725249	0.00726529	0.00730781	0.00732244	0.00735535	0.00737227	0.0074013	0.00740953	0.00744198	0.0074509	0.00747878	0.00748701	0.00750964	0.00751421	0.00752381	0.00754713	0.00756999	0.00756839	0.00757319	0.00758256	0.00759925	0.00761159	0.00763948	0.00765433	0.00768176	0.00770302
3	501	0	0.000697584	0.00133223	0.00189259	0.00199522	0.00233009	0.00238392	0.00262221	0.00259627	0.00281719	0.00277673	0.00297571	0.00288828	0.00308234	0.00297857	0.00317732	0.0030676	0.00325103	0.00313629	0.00331504	0.00319698	0.00336955	0.00322818	0.00340441	0.00327229	0.00344281	0.00329984	0.00346658	0.00331298	0.00349287	0.00335481	0.00351607	0.00336041	0.00353664	0.00338658	0.00356179	0.00339584	0.00358602	0.00344407	0.00361002	0.0034355	0.0036203	0.00346156	0.00364613	0.00349504	0.00368591	0.00351401	0.00371916
4	702	0	0.00221927	0.00436402	0.00502736	0.00528931	0.00550051	0.00566143	0.00576841	0.00580932	0.00587858	0.00590807	0.00597344	0.00600179	0.0060523	0.00606465	0.00611265	0.00612819	0.00617116	0.00618625	0.00623288	0.00624957	0.0062946	0.0063218	0.00636706	0.00637848	0.00641894	0.0064258	0.00647014	0.00647334	0.00651129	0.00652089	0.00655815	0.0065666	0.00660501	0.00660638	0.00664455	0.00663312	0.00668844	0.00669529	0.00672387	0.00671084	0.00674878	0.00673667	0.00677118	0.00676592	0.00680067	0.00680524	0.00685278
5	703	0	0.00207024	0.00427739	0.00495078	0.00519696	0.00531468	0.00537708	0.00543171	0.00547743	0.00552314	0.00557092	0.00563195	0.00571012	0.00577572	0.00581732	0.00586144	0.00589481	0.00592453	0.00595927	0.00598899	0.0060219	0.00605436	0.0061003	0.00611859	0.00615402	0.00617779	0.00620339	0.00622991	0.00625574	0.00627517	0.00630168	0.00632408	0.00634534	0.00636728	0.0063858	0.00640271	0.00640911	0.00644431	0.00646717	0.00647449	0.00648112	0.00650352	0.00651792	0.00654169	0.00656638	0.006589	0.00661186	0.00664546
6	705	0	0.00221462	0.00228525	0.00259383	0.0027511	0.00294059	0.00304985	0.00320551	0.0032942	0.00343912	0.00349398	0.00361329	0.00364095	0.0037381	0.00374267	0.00383067	0.00382861	0.0038997	0.0038885	0.00395913	0.0039413	0.00400485	0.00399251	0.00404599	0.00401651	0.00407319	0.00403845	0.00409628	0.00405468	0.00410839	0.00407022	0.00412668	0.00408714	0.00413811	0.00409514	0.00415068	0.00409262	0.004166	0.00412348	0.004174	0.00411114	0.00417651	0.00412554	0.00419343	0.00415274	0.0042188	0.00417445	0.00425468
7	707	0	0.00207824	0.00320467	0.00348742	0.00359691	0.00366251	0.0036968	0.00375143	0.00376835	0.00379555	0.00379715	0.00379258	0.00381886	0.00385246	0.00387212	0.00390344	0.00392081	0.00394047	0.00395967	0.00397064	0.00398115	0.0039903	0.00400332	0.00399304	0.00399601	0.0039871	0.00398092	0.0039775	0.00396904	0.00396218	0.00396287	0.00395738	0.00395349	0.00395258	0.00394847	0.00394869	0.00393178	0.00394641	0.00395189	0.00394778	0.00393361	0.00393887	0.00394207	0.00395121	0.00396149	0.00397292	0.00398344	0.00400652
8	708	0	-0.00109573	-0.000126099	1.44766e-06	6.84212e-05	0.000641468	0.000286257	0.000931991	0.00102479	0.00114983	0.00123051	0.0012824	0.00134115	0.00137863	0.00139601	0.00147121	0.00149041	0.00156538	0.00162436	0.00170436	0.0017503	0.00181636	0.00183876	0.00191556	0.00193499	0.00197591	0.0020326	0.00204951	0.002095	0.00211626	0.00218414	0.00220632	0.00226552	0.00227923	0.00229843	0.00234918	0.00238438	0.00243329	0.00247947	0.00250027	0.00249501	0.00256016	0.0025805	0.00264633	0.00264496	0.00268976	0.00272199	0.00278531
9	715	0	0.000460662	0.00306737	0.00372065	0.00389231	0.00399357	0.00400843	0.00403403	0.004061	0.00408889	0.00408432	0.00413483	0.00414055	0.00418375	0.00424638	0.00426192	0.00429941	0.00437393	0.00443359	0.00443656	0.00448959	0.00450582	0.00456776	0.0045689	0.00462011	0.00464502	0.00467496	0.00470171	0.00473119	0.00477257	0.00478925	0.00482651	0.00485417	0.00489394	0.00475954	0.0047776	0.00478697	0.00483703	0.00485554	0.00487223	0.00489371	0.00491749	0.00494629	0.00496709	0.00500297	0.0050336	0.00506629	0.00508366
10	Geobacillus stearothermophilis esterase	0	0.00446178	0.00580856	0.00669202	0.00722621	0.00760519	0.00777068	0.00791514	0.00803515	0.00813343	0.00820315	0.00826464	0.00831287	0.00836453	0.0083819	0.00840178	0.00841801	0.00843881	0.0084635	0.00848613	0.00850716	0.00852705	0.0085563	0.00856316	0.00857985	0.00859105	0.00860385	0.00861962	0.00862968	0.00864088	0.00865436	0.00866556	0.00867585	0.00869482	0.00870099	0.00871219	0.00870877	0.00873505	0.00874671	0.00875174	0.00874602	0.00876111	0.00876682	0.00878328	0.00879745	0.00881505	0.00882671	0.00885437
11	Bacillus subilis esterase	0	0.00393422	0.00541289	0.00596697	0.0061288	0.00619143	0.00621703	0.00625498	0.00627738	0.00630435	0.00632721	0.00634755	0.00636835	0.00638275	0.00638664	0.00641498	0.00643784	0.00647807	0.00652058	0.00655076	0.00657041	0.00658047	0.00660424	0.00660241	0.0066143	0.00661956	0.00662733	0.00664767	0.00663716	0.0066527	0.0066527	0.0066703	0.00666847	0.00667716	0.00667076	0.00668287	0.00666665	0.00669362	0.00668699	0.00669202	0.00667693	0.00668653	0.0066879	0.00669659	0.00670733	0.00671808	0.00672768	0.00675053
12	Aspergilis oryzae lipase	0	0.00102129	0.00187732	0.001982	0.00198772	0.00199366	0.00199938	0.00201583	0.00203938	0.00205515	0.00207069	0.00209675	0.00210635	0.00213081	0.00213172	0.00215024	0.00216875	0.0021795	0.00219687	0.00221355	0.00223207	0.00224876	0.00229379	0.00231047	0.00235276	0.00239802	0.00243893	0.00248236	0.00251734	0.00255368	0.00258499	0.0026122	0.00263871	0.00266843	0.00268808	0.00271551	0.00272603	0.00276717	0.0027914	0.00280832	0.00281883	0.00290112	0.00291712	0.00294272	0.00296809	0.00299461	0.00301861	0.00305381
13	Candita antarctica lipase A	0	0.0016908	0.00239253	0.00255208	0.00259071	0.0026122	0.00262614	0.00265745	0.00267825	0.00271071	0.00272694	0.00275231	0.00274911	0.002761	0.00274866	0.00275917	0.00276123	0.00275026	0.002769	0.00277037	0.00276969	0.00277311	0.00279094	0.00278203	0.0027898	0.00279392	0.00279597	0.0028026	0.00280374	0.00280443	0.00280763	0.0028122	0.00281472	0.00282066	0.00282363	0.00282775	0.00281654	0.00284123	0.00285037	0.0028522	0.00284375	0.00285769	0.00285837	0.0028778	0.0028906	0.00290866	0.00292215	0.00295209
14	Candita antarctica lipase B	0	0.00220693	0.00421727	0.00492335	0.00522393	0.00533845	0.00538142	0.00539925	0.00540748	0.00542143	0.00541983	0.00542531	0.00543034	0.00542645	0.00542348	0.00542348	0.00542348	0.00542188	0.0054228	0.00542463	0.00543034	0.00543377	0.00545206	0.00544817	0.00545274	0.00545343	0.00545686	0.00546188	0.00546257	0.00546486	0.00547217	0.00547697	0.00547994	0.00548566	0.00548657	0.0054916	0.00547857	0.0055044	0.00551034	0.00551149	0.0055012	0.00551446	0.00551766	0.00552977	0.00554143	0.00555766	0.00556703	0.0055924
15	Rhizopus oryzae esterase	0	0.0030977	0.00258477	0.00260854	0.00257562	0.00254522	0.00254614	0.00253471	0.00259505	0.00258248	0.00258454	0.00258019	0.00258339	0.00258614	0.00258431	0.00257608	0.00257974	0.00256762	0.00256877	0.00256031	0.00255917	0.00255185	0.00256008	0.00255962	0.00255162	0.00255139	0.00253996	0.00253471	0.00253334	0.00252236	0.00251894	0.00251322	0.00251711	0.00250614	0.00250636	0.00249562	0.00248991	0.00246933	0.00248396	0.00247596	0.00247231	0.00244899	0.00245516	0.00244579	0.0024499	0.00245128	0.00245859	0.00245265
16	Aspergilis oryzae phospholipase	0	0.000937172	0.00096323	0.00111889	0.000989288	0.00104803	0.00123067	0.0014341	0.0014357	0.00143684	0.00146199	0.00147959	0.0014837	0.00149536	0.00149696	0.00151022	0.00150976	0.00152919	0.00153513	0.00154953	0.00155982	0.00157765	0.00160234	0.00161056	0.00161879	0.00163502	0.00163799	0.00166542	0.00166931	0.0016812	0.00170154	0.00171	0.00172485	0.00174314	0.00175251	0.00176783	0.00176805	0.00180417	0.00181697	0.00183343	0.00182726	0.00184943	0.00186452	0.00188783	0.00191549	0.00193217	0.00195869	0.0019932
17	Pseudomonas sp. lipoprotein lipase	0	0.00295483	0.00541914	0.00542783	0.00549366	0.00553846	0.00548383	0.00545526	0.00545251	0.00547628	0.00549571	0.00553823	0.00557	0.00560589	0.00563035	0.00566646	0.00569161	0.00571721	0.00574898	0.00577207	0.00579195	0.00581321	0.00584635	0.00585915	0.00587813	0.00589367	0.00591013	0.00592704	0.00594007	0.00594876	0.0059659	0.0059723	0.0059851	0.00599379	0.00600019	0.00600613	0.0059979	0.00601893	0.00602739	0.00602807	0.00601733	0.00602442	0.00603013	0.00603836	0.00604979	0.00606122	0.00606922	0.0060907
18	Bovine pancreas phospholipase	0	0.00105626	0.00197286	0.00223047	0.00225973	0.00228601	0.0022915	0.00231344	0.00232716	0.00237196	0.00243916	0.00252465	0.00258614	0.00262065	0.0026538	0.00269243	0.00271963	0.00273929	0.00275757	0.00277151	0.002785	0.00280329	0.00282614	0.00283209	0.00284443	0.00285243	0.00285975	0.002873	0.00287895	0.00288512	0.00289906	0.0029066	0.00291552	0.00292603	0.00293586	0.00294341	0.00293815	0.00296741	0.00298089	0.00298866	0.00297289	0.00299255	0.00299758	0.00301655	0.00303141	0.00305221	0.00306364	0.00309587
	lysate	0	0.00145627	0.00209927	0.00229104	0.00236762	0.00240899	0.00244099	0.00247802	0.00250705	0.00255002	0.00262408	0.00266591	0.00269837	0.00272168	0.00274157	0.00276786	0.002793	0.00281174	0.00283369	0.00285495	0.00287438	0.00289678	0.00292901	0.00294066	0.00296009	0.00297838	0.00299324	0.00301449	0.00303598	0.00304924	0.00307072	0.00308878	0.00311118	0.00313061	0.0031425	0.00315987	0.00316353	0.00319827	0.00321839	0.00322867	0.00323004	0.00324993	0.00326342	0.00328353	0.0033057	0.00332605	0.00334822	0.00337862
	MasterMix+BHET	0	0.00131878	0.00197023	0.00189823	0.00188589	0.00192497	0.00215675	0.00220933	0.00220018	0.00224956	0.00225001	0.00227539	0.00228179	0.00228544	0.00228087	0.00229024	0.00228544	0.00229253	0.00229276	0.00230693	0.00230304	0.00233024	0.00233139	0.00237299	0.00233916	0.0023579	0.00237367	0.00236773	0.00236956	0.00238007	0.00239425	0.00243745	0.00242259	0.00244682	0.00245459	0.00249756	0.00245756	0.00249162	0.00250373	0.00251471	0.00250625	0.00252339	0.00252454	0.00254419	0.00256019	0.00258237	0.00259517	0.00262305
	MaserMix No BHET	0	-0.000149993	0.00108593	0.00118491	0.00121805	0.00134537	0.00156892	0.0016144	0.00164892	0.00169829	0.00171429	0.00173304	0.00173967	0.00174995	0.00175521	0.00176367	0.00176618	0.00177098	0.00178218	0.00180024	0.00182104	0.00184275	0.00186721	0.00187453	0.00188824	0.00190196	0.00190767	0.00191979	0.00192573	0.00193099	0.00193533	0.0019431	0.00194767	0.00195339	0.00195979	0.00196596	0.00196756	0.0019735	0.00197647	0.00197899	0.00198242	0.00198562	0.0019879	0.00199087	0.00199339	0.00199979	0.00200025	0.00200825
Trial 2
	Time (min)	0	14.9998	29.9998	44.9998	59.9998	74.9998	89.9998	105	120	135	150	165	180	195	210	225	240	255	270	285	300	315	330	345	360	375	390	405	420	435	450	465	480	495	510	525	540	555	570	585	600	615	630	645	660	675	690	705
1	T. fusca cutinase	0	0.00106068	0.00276222	0.00322006	0.00352316	0.0035819	0.00368613	0.00369002	0.00379288	0.00377688	0.00387654	0.00386008	0.00395243	0.00393048	0.00403974	0.00402397	0.00412363	0.00410535	0.00420455	0.00417826	0.00427815	0.00424775	0.00435198	0.00431564	0.00440364	0.00436981	0.00445964	0.00441941	0.00450764	0.00446536	0.00455816	0.00451976	0.00460868	0.00456456	0.00464776	0.00460753	0.00468319	0.00464913	0.0047456	0.00469645	0.00476525	0.00471999	0.00480845	0.00477028	0.00486354	0.00482445	0.00491703	0.00487634
2	I. sakiensis PETase	0	0.00323682	0.00376598	0.00392462	0.00412691	0.00431206	0.00452121	0.00460921	0.0047523	0.00480647	0.00493333	0.00497219	0.00507917	0.00509814	0.00519117	0.00520466	0.00529015	0.00529472	0.00537518	0.00537198	0.00544489	0.00544101	0.00551872	0.00550227	0.00556947	0.00554981	0.0056145	0.00559735	0.00565313	0.00562684	0.00568787	0.00566364	0.00571507	0.00568993	0.00573839	0.00571164	0.0057489	0.00573473	0.00578913	0.00575553	0.00578708	0.00575965	0.00580696	0.00578936	0.00584559	0.00582799	0.00588308	0.00586616
3	501	0	0.000510035	0.00134572	0.00192562	0.00221706	0.00243375	0.00264199	0.00271879	0.00285456	0.00294257	0.00307834	0.00313435	0.00322372	0.00327629	0.00335287	0.0034107	0.00348087	0.0035211	0.0035883	0.0036283	0.00368522	0.00372042	0.00376111	0.00378991	0.00383562	0.00385597	0.00389963	0.00391471	0.00394123	0.0039602	0.00399837	0.00401254	0.00403037	0.00404637	0.00407403	0.00409117	0.00410329	0.00408797	0.00411312	0.00408089	0.00411518	0.00408866	0.00414786	0.00413666	0.00419815	0.00418123	0.00422969	0.00422878
4	702	0	0.00119592	0.00289175	0.00349131	0.0037352	0.00386823	0.00393087	0.0040239	0.00410847	0.00419442	0.00425613	0.00434116	0.00437591	0.00442734	0.00445362	0.0044966	0.00451808	0.00455854	0.00458071	0.00462049	0.0046406	0.00468152	0.00470826	0.00475283	0.00476906	0.00480312	0.00481935	0.00485684	0.00486507	0.00490027	0.00491535	0.0049485	0.00496313	0.00499444	0.00500336	0.00503719	0.00503376	0.00508222	0.00509822	0.00512382	0.0051165	0.00515467	0.00515673	0.00519696	0.00520405	0.00523811	0.00525456	0.00529296
5	703	0	0.00116255	0.00289403	0.00340262	0.00361566	0.00367326	0.00376377	0.00383143	0.00388789	0.00393909	0.00398984	0.00402847	0.00407053	0.00409544	0.00413681	0.00417293	0.00419944	0.00423259	0.00426436	0.00429156	0.00432311	0.00435008	0.00439077	0.00440539	0.00444242	0.0044614	0.00448928	0.00451191	0.00453706	0.00455694	0.00458643	0.00460814	0.0046342	0.00465752	0.00468312	0.00470483	0.004719	0.00475055	0.00477843	0.00478255	0.00478895	0.00480906	0.00482209	0.00484266	0.00486575	0.00488084	0.00490461	0.00492518
6	705	0	0.000999726	0.00162603	0.00186992	0.00199587	0.00206742	0.00214879	0.00223862	0.00234994	0.00245691	0.00255726	0.00261326	0.00267064	0.00271132	0.00276504	0.00280298	0.00284481	0.00287887	0.00292413	0.00295247	0.00299087	0.00302447	0.0030679	0.00309053	0.00313191	0.00315522	0.00318974	0.00321625	0.00324482	0.00326654	0.00330243	0.003323	0.00335203	0.00336963	0.0033998	0.00341832	0.00343454	0.00346563	0.00350083	0.00351295	0.00352232	0.00354609	0.00356895	0.00359318	0.00362609	0.00365238	0.0036805	0.00370564
7	707	0	0.00102106	0.00137833	0.0015173	0.00167091	0.00178634	0.00184303	0.00190177	0.00191457	0.00194246	0.0019452	0.00194635	0.00195778	0.00197766	0.00199115	0.00202521	0.00205218	0.00207778	0.00210887	0.00214041	0.00216875	0.00219984	0.00223824	0.00226041	0.00229059	0.00231344	0.00234019	0.00236762	0.00238727	0.00240922	0.00243528	0.00245608	0.00247619	0.00249448	0.00250956	0.00252648	0.00252854	0.00255642	0.00257882	0.00258659	0.00258454	0.00260717	0.00261768	0.00264283	0.00266203	0.00268534	0.0027034	0.00272671
8	708	0	0.00104742	0.0015807	0.00184059	0.00195625	0.0020406	0.00211146	0.00218026	0.00224746	0.00235421	0.00243055	0.0024893	0.00256221	0.00263696	0.0026925	0.00274416	0.00278873	0.00282988	0.00286965	0.00290874	0.00294051	0.00298143	0.00302348	0.0030516	0.00308932	0.0031172	0.0031476	0.00317938	0.0032068	0.00323263	0.00326578	0.00329206	0.00331561	0.00334487	0.00336841	0.0033915	0.0034027	0.00344178	0.00347196	0.00349001	0.00349687	0.00352704	0.00354441	0.00357642	0.00360499	0.00363425	0.00366099	0.00369345
9	715	0	0.000962392	0.0029268	0.0034891	0.00368568	0.00376202	0.00378099	0.00381688	0.00384682	0.00387265	0.00389345	0.00393986	0.00395974	0.00398946	0.00402512	0.00405917	0.00409323	0.00412569	0.00416089	0.00419289	0.00422489	0.00425644	0.00429827	0.00432204	0.00435518	0.00437941	0.00440821	0.00443679	0.00445827	0.00448273	0.00451473	0.00453873	0.00456365	0.00458833	0.00461416	0.00463771	0.00465279	0.00469645	0.00472891	0.00474445	0.00474445	0.00476754	0.00477897	0.00480251	0.004824	0.004848	0.00487177	0.00489714
10	Geobacillus stearothermophilis esterase	0	0.00300573	0.00427686	0.00494568	0.00527986	0.00556535	0.00584285	0.00593565	0.00603051	0.00615212	0.006236	0.00631281	0.00636378	0.00641041	0.00644355	0.00648081	0.00650435	0.00652607	0.00654641	0.00656539	0.00659441	0.00661567	0.00663624	0.00664562	0.00666002	0.00666665	0.00667579	0.0066879	0.00669019	0.00670139	0.00671236	0.00671785	0.0067215	0.00672882	0.00672973	0.00673956	0.00673042	0.00675236	0.00676288	0.00676585	0.00675602	0.00677111	0.00676996	0.00678916	0.00680242	0.00681659	0.00682642	0.00684814
11	Bacillus subilis esterase	0	0.00160363	0.00311888	0.00373627	0.00395868	0.00407571	0.00415548	0.00422108	0.00425743	0.00429629	0.00431777	0.0043484	0.00436989	0.00438589	0.00440006	0.00442223	0.00444029	0.00446292	0.00448372	0.00450109	0.00451412	0.00453881	0.00455915	0.00457378	0.00459184	0.00460761	0.00462658	0.00464693	0.0046563	0.00467435	0.00468967	0.00470636	0.00471504	0.00472739	0.00473767	0.00475321	0.00475299	0.00478179	0.00479824	0.00480784	0.00480464	0.00482682	0.00483276	0.00485836	0.00487848	0.00489813	0.00491688	0.00494088
12	Aspergilis oryzae lipase	0	6.51449e-05	0.000318638	0.000370754	0.000466529	0.000481844	0.000490072	0.000502644	0.00050173	0.000519102	0.000528931	0.000538531	0.00054516	0.000545388	0.000554074	0.000562532	0.000568475	0.000572132	0.000581504	0.000588818	0.000592704	0.000606647	0.000623334	0.000623105	0.000637506	0.000640706	0.00064642	0.000657849	0.000663563	0.000668821	0.000680707	0.000691907	0.000694193	0.000704479	0.000708822	0.000717508	0.000715451	0.000739223	0.000753395	0.000758652	0.000754995	0.000770538	0.000774881	0.000797511	0.000814882	0.000833397	0.000849169	0.00086997
13	Candita antarctica lipase A	0	0.000167319	0.000431556	0.000496244	0.000508816	0.000517959	0.000518645	0.000529159	0.000532817	0.000541045	0.00054836	0.000552017	0.000543331	0.000543103	0.000536702	0.000539445	0.000534188	0.00053716	0.000536245	0.000534874	0.000535331	0.00053876	0.000546303	0.000544474	0.000547674	0.00054516	0.000546531	0.000554303	0.000550189	0.00054996	0.000557503	0.000560703	0.000560475	0.000567103	0.000566418	0.000570303	0.000558189	0.000580361	0.000589047	0.000589733	0.000578075	0.000590876	0.000589961	0.000606876	0.000619905	0.000633391	0.000644134	0.000661735
14	Candita antarctica lipase B	0	2.56008e-05	0.000756138	0.00117809	0.00140119	0.00157239	0.0017228	0.00185857	0.00197835	0.00209629	0.00218978	0.00228053	0.00235527	0.0024179	0.00247619	0.00252945	0.00257402	0.0026122	0.00264603	0.00267848	0.00270683	0.00273311	0.00276146	0.00277837	0.00279734	0.00280763	0.00282432	0.00283529	0.00284215	0.0028522	0.00286523	0.00287278	0.00287643	0.00288489	0.00288695	0.00289312	0.00288306	0.00290592	0.0029162	0.0029178	0.00290752	0.00292101	0.00291575	0.00292923	0.00294112	0.00295506	0.00296466	0.00297998
15	Rhizopus oryzae esterase	0	-0.00180074	-0.00204212	-0.00210247	-0.00215161	-0.00220784	-0.0022355	-0.00225561	-0.00225584	-0.00227436	-0.00229721	-0.0023123	-0.00233104	-0.00234682	-0.0023619	-0.00238636	-0.00239779	-0.00241539	-0.00243116	-0.00244716	-0.00246019	-0.00248099	-0.00248991	-0.00249951	-0.00251025	-0.00252374	-0.00253471	-0.00254796	-0.00256008	-0.00257128	-0.00258637	-0.00259162	-0.00260282	-0.0026154	-0.00262431	-0.00263711	-0.00264694	-0.00266934	-0.00265974	-0.002665	-0.00267757	-0.0027002	-0.00270408	-0.00271186	-0.0027082	-0.00270683	-0.00270866	-0.00271003
16	Aspergilis oryzae phospholipase	0	-0.000342868	7.4288e-05	0.000166177	5.39445e-05	-0.000215092	-0.000264923	-0.000222864	-0.000207549	-0.000211207	-0.000238407	-0.000208921	-0.000223778	-0.000221721	-0.000232693	-0.000222178	-0.000230636	-0.000238407	-0.000217835	-0.000215321	-0.000194749	-0.000190863	-0.000174405	-0.000170291	-0.000160919	-0.000160005	-0.000157719	-0.000144004	-0.00013829	-0.000130061	-0.000117947	-0.000106746	-0.000107432	-9.71459e-05	-9.00599e-05	-8.22883e-05	-8.36597e-05	-5.60017e-05	-4.61729e-05	-3.58868e-05	-4.36585e-05	-2.28579e-05	-2.05721e-05	3.88584e-06	2.19435e-05	1.05146e-05	5.3716e-05	8.20597e-05
17	Pseudomonas sp. lipoprotein lipase	0	0.00240762	0.00381749	0.00384058	0.00389818	0.00394801	0.00392218	0.00397498	0.00399601	0.00399395	0.00400127	0.00405018	0.0040751	0.00410938	0.00414001	0.00417476	0.00419487	0.00422482	0.00425179	0.0042751	0.00430025	0.00432516	0.00435008	0.00436951	0.00438779	0.00439671	0.00441591	0.00442917	0.00444082	0.00445134	0.0044678	0.00447145	0.00448128	0.00448654	0.0044918	0.00449705	0.00448471	0.00450437	0.00451534	0.0045158	0.00450323	0.00451145	0.00451077	0.0045222	0.00453111	0.00454186	0.00454643	0.00455968
18	Bovine pancreas phospholipase	0	-0.000154748	0.000363211	0.000580132	0.000634991	0.000653277	0.000660135	0.000669507	0.000680021	0.000702193	0.000707222	0.000723222	0.000731223	0.000740823	0.000745166	0.000756138	0.000759566	0.000766652	0.000774653	0.000777853	0.00078151	0.000794996	0.000805968	0.00081214	0.000822654	0.000824483	0.000832026	0.000842083	0.000843912	0.000853741	0.000861512	0.000868827	0.000872941	0.000887342	0.000890313	0.000896028	0.000890085	0.000915914	0.000929172	0.000939686	0.000922314	0.000940372	0.000941058	0.00096163	0.00097603	0.000992945	0.00100346	0.0010302
	lysate	0	0.000597961	0.00083934	0.000900142	0.000952715	0.000979916	0.00099546	0.00101489	0.00102289	0.00104072	0.0010478	0.00106198	0.00106312	0.00106792	0.00106769	0.00107386	0.0010766	0.00107935	0.00108232	0.00108598	0.00108918	0.00109558	0.00110655	0.00110723	0.00111249	0.00111523	0.00111843	0.00112529	0.00113032	0.00113421	0.00114335	0.00115021	0.00115821	0.00116712	0.00117055	0.00118152	0.00117832	0.00120529	0.00122541	0.00123341	0.00123455	0.00125924	0.00127158	0.00129901	0.00132827	0.00135136	0.00137627	0.00140347
	MasterMix+BHET	0	0.000633048	0.000886313	0.000531331	0.000296809	0.000156462	0.000107775	0.000206749	0.000228921	0.000232807	0.000249722	0.00026778	0.000271437	0.00027418	0.00027578	0.00028538	0.000284923	0.000290409	0.000290409	0.000302981	0.000297952	0.000323553	0.000318296	0.000361726	0.000331325	0.000343668	0.000360583	0.000345954	0.000346868	0.000349611	0.000355554	0.000385269	0.000361268	0.000373612	0.000372469	0.00040447	0.000363326	0.000387098	0.000394412	0.00039807	0.000387783	0.00039967	0.000397384	0.00041567	0.000429842	0.000445157	0.000454528	0.000474872
	MasterMix No BHET	0	1.17718e-05	0.000763567	0.000791453	0.00078711	0.000785282	0.000794425	0.000870313	0.000958544	0.000982545	0.00101409	0.00104952	0.00108106	0.00110003	0.00111238	0.00112449	0.00113021	0.00114255	0.00114895	0.00115649	0.00115969	0.00116472	0.00116998	0.00117432	0.00117707	0.00118049	0.00118552	0.00118964	0.00119009	0.00119764	0.00119832	0.00120267	0.00120358	0.00120701	0.00120861	0.00121181	0.00121478	0.00121638	0.00121867	0.00121981	0.00122255	0.0012269	0.00122552	0.00123101	0.00123192	0.00123535	0.00123284	0.0012365
	Average
	Time (min)	0	14.9998	29.9998	44.9998	59.9998	74.9998	89.9998	105	120	135	150	165	180	195	210	225	240	255	270	285	300	315	330	345	360	375	390	405	420	435	450	465	480	495	510	525	540	555	570	585	600	615	630	645	660	675	690	705
1	T. fusca cutinase	0	0.00153292	0.00349447	0.00402123	0.00432695	0.00442353	0.00456479	0.00460399	0.00471908	0.00472788	0.00482034	0.00482011	0.00490229	0.004892	0.00497326	0.00496297	0.00504103	0.00502778	0.00510561	0.00508949	0.00516778	0.00514789	0.00523224	0.0052063	0.00527898	0.00525715	0.0053271	0.00530287	0.00537384	0.00534584	0.00542139	0.0053975	0.00546802	0.00544207	0.00550813	0.00548219	0.00553979	0.00552551	0.00560094	0.00556962	0.00562174	0.00559694	0.00566585	0.00564437	0.00571865	0.0056982	0.00577214	0.0057534
2	I. sakiensis PETase	0	0.00380118	0.00465458	0.00481024	0.00512968	0.00526946	0.00543335	0.00551164	0.00563221	0.0056929	0.0058009	0.00584799	0.00594182	0.00597268	0.00604777	0.00607691	0.00614846	0.00616674	0.0062336	0.00624606	0.00630709	0.00631863	0.00638561	0.00638378	0.00643864	0.00643612	0.00648493	0.00648481	0.00652721	0.00651818	0.00656493	0.00655727	0.00659693	0.00658847	0.00662402	0.00661293	0.00663636	0.00664093	0.00667956	0.00666196	0.00668013	0.0066711	0.0067031	0.00670047	0.00674253	0.00674116	0.00678242	0.00678459
3	501	0	0.000603809	0.00133897	0.00190911	0.00210614	0.00238192	0.00251295	0.0026705	0.00272542	0.00287988	0.00292754	0.00305503	0.003056	0.00317932	0.00316572	0.00329401	0.00327424	0.00338607	0.00336229	0.00347167	0.0034411	0.00354499	0.00349464	0.00359716	0.00355396	0.00364939	0.00359973	0.00369065	0.0036271	0.00372653	0.00367659	0.00376431	0.00369539	0.00379151	0.00373031	0.00382648	0.00374956	0.003837	0.00377859	0.00384545	0.00377534	0.00385448	0.00380471	0.0038914	0.0038466	0.00393357	0.00387185	0.00397397
4	702	0	0.0017076	0.00362788	0.00425933	0.00451225	0.00468437	0.00479615	0.00489615	0.0049589	0.0050365	0.0050821	0.0051573	0.00518885	0.00523982	0.00525913	0.00530462	0.00532314	0.00536485	0.00538348	0.00542668	0.00544508	0.00548806	0.00551503	0.00555994	0.00557377	0.00561103	0.00562257	0.00566349	0.0056692	0.00570578	0.00571812	0.00575332	0.00576486	0.00579972	0.00580487	0.00584087	0.00583344	0.00588533	0.00589675	0.00592384	0.00591367	0.00595173	0.0059467	0.00598407	0.00598499	0.00601939	0.0060299	0.00607287
5	703	0	0.00161639	0.00358571	0.0041767	0.00440631	0.00449397	0.00457043	0.00463157	0.00468266	0.00473112	0.00478038	0.00483021	0.00489032	0.00493558	0.00497707	0.00501718	0.00504713	0.00507856	0.00511182	0.00514027	0.0051725	0.00520222	0.00524553	0.00526199	0.00529822	0.00531959	0.00534634	0.00537091	0.0053964	0.00541605	0.00544405	0.00546611	0.00548977	0.0055124	0.00553446	0.00555377	0.00556406	0.00559743	0.0056228	0.00562852	0.00563503	0.00565629	0.00567	0.00569218	0.00571606	0.00573492	0.00575824	0.00578532
6	705	0	0.00160717	0.00195564	0.00223188	0.00237348	0.002504	0.00259932	0.00272207	0.00282207	0.00294802	0.00302562	0.00311328	0.00315579	0.00322471	0.00325385	0.00331683	0.00333671	0.00338929	0.00340632	0.0034558	0.00346609	0.00351466	0.0035302	0.00356826	0.00357421	0.00361421	0.00361409	0.00365627	0.00364975	0.00368747	0.00368632	0.00372484	0.00371958	0.00375387	0.00374747	0.0037845	0.00376358	0.00381581	0.00381216	0.00384347	0.00381673	0.0038613	0.00384724	0.0038933	0.00388942	0.00393559	0.00392747	0.00398016
7	707	0	0.00154965	0.0022915	0.00250236	0.00263391	0.00272443	0.00276991	0.0028266	0.00284146	0.002869	0.00287117	0.00286946	0.00288832	0.00291506	0.00293163	0.00296432	0.00298649	0.00300912	0.00303427	0.00305552	0.00307495	0.00309507	0.00312078	0.00312673	0.0031433	0.00315027	0.00316056	0.00317256	0.00317816	0.0031857	0.00319907	0.00320673	0.00321484	0.00322353	0.00322901	0.00323759	0.00323016	0.00325142	0.00326536	0.00326719	0.00325907	0.00327302	0.00327987	0.00329702	0.00331176	0.00332913	0.00334342	0.00336662
8	708	0	-2.41531e-05	0.000727299	0.000921019	0.00101234	0.00134103	0.00119886	0.00155612	0.00163613	0.00175202	0.00183053	0.00188585	0.00195168	0.0020078	0.00204425	0.00210768	0.00213957	0.00219763	0.002247	0.00230655	0.00234541	0.00239889	0.00243112	0.00248358	0.00251215	0.00254656	0.0025901	0.00261444	0.0026509	0.00267445	0.00272496	0.00274919	0.00279056	0.00281205	0.00283342	0.00287034	0.00289354	0.00293754	0.00297571	0.00299514	0.00299594	0.0030436	0.00306246	0.00311137	0.00312497	0.003162	0.00319149	0.00323938
9	715	0	0.000711527	0.00299708	0.00360487	0.00378899	0.0038778	0.00389471	0.00392546	0.00395391	0.00398077	0.00398889	0.00403734	0.00405014	0.0040866	0.00413575	0.00416055	0.00419632	0.00424981	0.00429724	0.00431472	0.00435724	0.00438113	0.00443301	0.00444547	0.00448764	0.00451222	0.00454159	0.00456925	0.00459473	0.00462765	0.00465199	0.00468262	0.00470891	0.00474114	0.00468685	0.00470765	0.00471988	0.00476674	0.00479223	0.00480834	0.00481908	0.00484251	0.00486263	0.0048848	0.00491349	0.0049408	0.00496903	0.0049904
10	Geobacillus stearothermophilis esterase	0	0.00373375	0.00504271	0.00581885	0.00625303	0.00658527	0.00680676	0.0069254	0.00703283	0.00714277	0.00721958	0.00728872	0.00733832	0.00738747	0.00741273	0.0074413	0.00746118	0.00748244	0.00750496	0.00752576	0.00755079	0.00757136	0.00759627	0.00760439	0.00761993	0.00762885	0.00763982	0.00765376	0.00765993	0.00767113	0.00768336	0.00769171	0.00769868	0.00771182	0.00771536	0.00772588	0.00771959	0.00774371	0.00775479	0.00775879	0.00775102	0.00776611	0.00776839	0.00778622	0.00779994	0.00781582	0.00782657	0.00785125
11	Bacillus subilis esterase	0	0.00276892	0.00426588	0.00485162	0.00504374	0.00513357	0.00518626	0.00523803	0.0052674	0.00530032	0.00532249	0.00534798	0.00536912	0.00538432	0.00539335	0.00541861	0.00543906	0.00547049	0.00550215	0.00552592	0.00554227	0.00555964	0.0055817	0.0055881	0.00560307	0.00561358	0.00562696	0.0056473	0.00564673	0.00566353	0.00567119	0.00568833	0.00569176	0.00570227	0.00570422	0.00571804	0.00570982	0.0057377	0.00574262	0.00574993	0.00574079	0.00575667	0.00576033	0.00577747	0.0057929	0.0058081	0.00582228	0.00584571
12	Aspergilis oryzae lipase	0	0.000543217	0.00109798	0.00117638	0.00122712	0.00123775	0.00124472	0.00125924	0.00127055	0.00128713	0.00129981	0.00131764	0.00132576	0.0013381	0.0013429	0.00135639	0.00136861	0.00137581	0.00138919	0.00140119	0.00141239	0.0014277	0.00145856	0.00146679	0.00149513	0.00151936	0.00154268	0.00157011	0.00159045	0.00161125	0.00163285	0.00165205	0.00166645	0.00168645	0.00169845	0.00171651	0.00172074	0.0017532	0.0017724	0.00178348	0.00178691	0.00183583	0.001846	0.00187012	0.00189149	0.001914	0.00193389	0.00196189
13	Candita antarctica lipase A	0	0.000929057	0.00141204	0.00152416	0.00154976	0.00156508	0.00157239	0.00159331	0.00160554	0.00162588	0.00163765	0.00165217	0.00164622	0.00165205	0.00164268	0.00164931	0.00164771	0.00164371	0.00165262	0.00165262	0.00165251	0.00165594	0.00166862	0.00166325	0.00166874	0.00166954	0.00167125	0.00167845	0.00167697	0.00167719	0.00168257	0.00168645	0.0016876	0.00169388	0.00169502	0.00169902	0.00168737	0.0017108	0.00171971	0.00172097	0.00171091	0.00172428	0.00172417	0.00174234	0.00175525	0.00177103	0.00178314	0.00180691
14	Candita antarctica lipase B	0	0.00111626	0.00248671	0.00305072	0.00331256	0.00345542	0.00355211	0.00362891	0.00369291	0.00375886	0.0038048	0.00385292	0.00389281	0.00392218	0.00394984	0.00397647	0.00399875	0.00401704	0.00403441	0.00405155	0.00406858	0.00408344	0.00410676	0.00411327	0.00412504	0.00413053	0.00414059	0.00414859	0.00415236	0.00415853	0.0041687	0.00417487	0.00417819	0.00418527	0.00418676	0.00419236	0.00418082	0.00420516	0.00421327	0.00421465	0.00420436	0.00421773	0.0042167	0.0042295	0.00424127	0.00425636	0.00426585	0.00428619
15	Rhizopus oryzae esterase	0	0.000648477	0.000271323	0.000253036	0.000212007	0.000168691	0.000155319	0.000139547	0.000169605	0.000154062	0.000143662	0.000133947	0.000126175	0.000119661	0.000111203	9.48601e-05	9.09743e-05	7.61167e-05	6.88021e-05	5.65732e-05	4.94873e-05	3.54297e-05	3.50868e-05	3.00581e-05	2.06864e-05	1.3829e-05	2.62865e-06	-6.62878e-06	-1.33718e-05	-2.44579e-05	-3.37153e-05	-3.92012e-05	-4.28585e-05	-5.46303e-05	-5.89733e-05	-7.07451e-05	-7.85167e-05	-0.000100003	-8.78884e-05	-9.45172e-05	-0.000102632	-0.000125604	-0.000124461	-0.000133033	-0.000129147	-0.000127775	-0.000125032	-0.00012869
16	Aspergilis oryzae phospholipase	0	0.000297152	0.000518759	0.000642534	0.000521616	0.00041647	0.000482872	0.000605619	0.000614076	0.000612819	0.00061179	0.000635334	0.000629962	0.00063682	0.000632134	0.00064402	0.000639563	0.000645391	0.000658649	0.000667106	0.000682536	0.000693393	0.000713965	0.000720137	0.000728937	0.000737509	0.000740137	0.000760709	0.00076551	0.000775567	0.000791796	0.000801625	0.000808711	0.000822997	0.000831226	0.000842769	0.000842198	0.000874084	0.000885399	0.000898771	0.000891799	0.000913286	0.000921972	0.000945858	0.000968716	0.000971344	0.0010062	0.00103763
17	Pseudomonas sp. lipoprotein lipase	0	0.00268123	0.00461831	0.0046342	0.00469592	0.00474323	0.004703	0.00471512	0.00472426	0.00473512	0.00474849	0.00479421	0.00482255	0.00485764	0.00488518	0.00492061	0.00494324	0.00497101	0.00500038	0.00502358	0.0050461	0.00506919	0.00509822	0.00511433	0.00513296	0.00514519	0.00516302	0.0051781	0.00519045	0.00520005	0.00521685	0.00522188	0.00523319	0.00524016	0.00524599	0.00525159	0.00524131	0.00526165	0.00527136	0.00527194	0.00526028	0.00526794	0.00527045	0.00528028	0.00529045	0.00530154	0.00530782	0.00532519
18	Bovine pancreas phospholipase	0	0.000450757	0.00116804	0.0014053	0.00144736	0.00146965	0.00147582	0.00149147	0.00150359	0.00153708	0.00157319	0.00162394	0.00165868	0.00168074	0.00169948	0.00172428	0.0017396	0.00175297	0.00176611	0.00177468	0.00178326	0.00179914	0.00181606	0.00182211	0.00183354	0.00183846	0.00184589	0.00185754	0.00186143	0.00186943	0.00188029	0.00188772	0.00189423	0.00190669	0.00191309	0.00191972	0.00191412	0.00194166	0.00195503	0.00196418	0.0019476	0.00196646	0.00196932	0.00198909	0.00200372	0.00202258	0.00203355	0.00206304
	lysate	0	0.00102712	0.0014693	0.00159559	0.00166017	0.00169445	0.00171822	0.00174645	0.00176497	0.00179537	0.00183594	0.00186394	0.00188074	0.0018948	0.00190463	0.00192086	0.0019348	0.00194555	0.001958	0.00197046	0.00198178	0.00199618	0.00201778	0.00202395	0.00203629	0.00204681	0.00205584	0.00206989	0.00208315	0.00209172	0.00210704	0.00211949	0.00213469	0.00214887	0.00215652	0.0021707	0.00217092	0.00220178	0.0022219	0.00223104	0.0022323	0.00225458	0.0022675	0.00229127	0.00231699	0.0023387	0.00236224	0.00239105
	MasterMix+BHET	0	0.000975916	0.00142827	0.00121478	0.00109135	0.00104072	0.00113226	0.00120804	0.00121455	0.00124118	0.00124987	0.00127158	0.00127661	0.00127981	0.00127833	0.00128781	0.00128518	0.00129147	0.00129158	0.00130495	0.0013005	0.0013269	0.00132484	0.00136736	0.00133524	0.00135078	0.00136713	0.00135684	0.00135821	0.00136484	0.0013749	0.00141136	0.00139193	0.00141022	0.00141353	0.00145102	0.00141044	0.00143936	0.00144907	0.00145639	0.00144702	0.00146153	0.00146096	0.00147993	0.00149502	0.00151376	0.00152485	0.00154896
	MasterMix No BHET	0	-6.91107e-05	0.000924749	0.000988179	0.00100258	0.00106532	0.00118167	0.00124236	0.00130373	0.00134042	0.00136419	0.00139128	0.00141036	0.00142499	0.00143379	0.00144408	0.00144819	0.00145677	0.00146557	0.00147837	0.00149037	0.00150374	0.0015186	0.00152442	0.00153265	0.00154123	0.0015466	0.00155471	0.00155791	0.00156431	0.00156683	0.00157288	0.00157563	0.0015802	0.0015842	0.00158888	0.00159117	0.00159494	0.00159757	0.0015994	0.00160248	0.00160626	0.00160671	0.00161094	0.00161266	0.00161757	0.00161654	0.00162237
[truncated: 50 more columns]

## Sheet: µmol Buffer Protonated
Trial 1
	Time (min)	0	14.9998	29.9998	44.9998	59.9998	74.9998	89.9998	105	120	135	150	165	180	195	210	225	240	255	270	285	300	315	330	345	360	375	390	405	420	435	450	465	480	495	510	525	540	555	570	585	600	615	630	645	660	675	690	705
1	T. fusca cutinase	0	0.100258	0.211336	0.24112	0.256537	0.263258	0.272172	0.275898	0.282264	0.283944	0.288207	0.289007	0.292607	0.292676	0.295339	0.295099	0.297922	0.29751	0.300333	0.300036	0.30287	0.302402	0.305625	0.304848	0.307716	0.307225	0.309728	0.309316	0.312002	0.311316	0.314231	0.313762	0.316368	0.315979	0.318425	0.317842	0.319819	0.320094	0.322814	0.32214	0.323911	0.323694	0.326163	0.325923	0.328688	0.328597	0.331363	0.331523
2	I. sakiensis PETase	0	0.218277	0.277159	0.284794	0.306623	0.311343	0.317275	0.320703	0.325606	0.328966	0.333424	0.336189	0.340224	0.342361	0.345218	0.347458	0.350339	0.351939	0.354601	0.356007	0.358464	0.359813	0.362625	0.363265	0.36539	0.366122	0.367768	0.368613	0.370065	0.370476	0.372099	0.372545	0.373939	0.374351	0.375482	0.375711	0.376191	0.377356	0.378499	0.378419	0.378659	0.379128	0.379962	0.380579	0.381974	0.382717	0.384088	0.385151
3	501	0	0.0348792	0.0666116	0.0946296	0.0997612	0.116505	0.119196	0.131111	0.129814	0.14086	0.138837	0.148786	0.144414	0.154117	0.148928	0.158866	0.15338	0.162552	0.156814	0.165752	0.159849	0.168478	0.161409	0.170221	0.163615	0.172141	0.164992	0.173329	0.165649	0.174644	0.16774	0.175804	0.16802	0.176832	0.169329	0.178089	0.169792	0.179301	0.172203	0.180501	0.171775	0.181015	0.173078	0.182307	0.174752	0.184295	0.175701	0.185958
4	702	0	0.110963	0.218201	0.251368	0.264465	0.275026	0.283072	0.28842	0.290466	0.293929	0.295403	0.298672	0.300089	0.302615	0.303232	0.305632	0.30641	0.308558	0.309312	0.311644	0.312478	0.31473	0.31609	0.318353	0.318924	0.320947	0.32129	0.323507	0.323667	0.325564	0.326044	0.327907	0.32833	0.33025	0.330319	0.332227	0.331656	0.334422	0.334765	0.336193	0.335542	0.337439	0.336833	0.338559	0.338296	0.340033	0.340262	0.342639
5	703	0	0.103512	0.21387	0.247539	0.259848	0.265734	0.268854	0.271586	0.273871	0.276157	0.278546	0.281597	0.285506	0.288786	0.290866	0.293072	0.294741	0.296226	0.297964	0.299449	0.301095	0.302718	0.305015	0.30593	0.307701	0.30889	0.31017	0.311495	0.312787	0.313758	0.315084	0.316204	0.317267	0.318364	0.31929	0.320136	0.320456	0.322216	0.323359	0.323724	0.324056	0.325176	0.325896	0.327084	0.328319	0.32945	0.330593	0.332273
6	705	0	0.110731	0.114263	0.129692	0.137555	0.147029	0.152492	0.160275	0.16471	0.171956	0.174699	0.180665	0.182048	0.186905	0.187133	0.191534	0.191431	0.194985	0.194425	0.197957	0.197065	0.200242	0.199625	0.2023	0.200825	0.20366	0.201922	0.204814	0.202734	0.20542	0.203511	0.206334	0.204357	0.206905	0.204757	0.207534	0.204631	0.2083	0.206174	0.2087	0.205557	0.208826	0.206277	0.209671	0.207637	0.21094	0.208723	0.212734
7	707	0	0.103912	0.160234	0.174371	0.179846	0.183126	0.18484	0.187572	0.188417	0.189777	0.189857	0.189629	0.190943	0.192623	0.193606	0.195172	0.19604	0.197023	0.197983	0.198532	0.199058	0.199515	0.200166	0.199652	0.1998	0.199355	0.199046	0.198875	0.198452	0.198109	0.198143	0.197869	0.197675	0.197629	0.197423	0.197435	0.196589	0.19732	0.197595	0.197389	0.19668	0.196943	0.197103	0.19756	0.198075	0.198646	0.199172	0.200326
8	708	0	-0.0547865	-0.00630496	7.23832e-05	0.00342106	0.0320734	0.0143128	0.0465995	0.0512397	0.0574913	0.0615257	0.0641201	0.0670573	0.0689317	0.0698003	0.0735604	0.0745204	0.0782691	0.0812178	0.0852179	0.0875151	0.0908181	0.0919381	0.0957782	0.0967497	0.0987955	0.10163	0.102476	0.10475	0.105813	0.109207	0.110316	0.113276	0.113962	0.114922	0.117459	0.119219	0.121665	0.123973	0.125013	0.124751	0.128008	0.129025	0.132316	0.132248	0.134488	0.136099	0.139265
9	715	0	0.0230331	0.153369	0.186032	0.194616	0.199679	0.200421	0.201702	0.20305	0.204444	0.204216	0.206742	0.207027	0.209187	0.212319	0.213096	0.21497	0.218696	0.221679	0.221828	0.224479	0.225291	0.228388	0.228445	0.231005	0.232251	0.233748	0.235085	0.23656	0.238628	0.239463	0.241326	0.242708	0.244697	0.237977	0.23888	0.239348	0.241851	0.242777	0.243611	0.244686	0.245874	0.247314	0.248354	0.250149	0.25168	0.253315	0.254183
10	Geobacillus stearothermophilis esterase	0	0.223089	0.290428	0.334601	0.36131	0.380259	0.388534	0.395757	0.401757	0.406672	0.410158	0.413232	0.415643	0.418226	0.419095	0.420089	0.420901	0.421941	0.423175	0.424307	0.425358	0.426352	0.427815	0.428158	0.428992	0.429552	0.430192	0.430981	0.431484	0.432044	0.432718	0.433278	0.433793	0.434741	0.43505	0.43561	0.435438	0.436753	0.437335	0.437587	0.437301	0.438056	0.438341	0.439164	0.439873	0.440753	0.441336	0.442719
11	Bacillus subilis esterase	0	0.196711	0.270645	0.298348	0.30644	0.309572	0.310852	0.312749	0.313869	0.315217	0.31636	0.317377	0.318418	0.319138	0.319332	0.320749	0.321892	0.323903	0.326029	0.327538	0.328521	0.329024	0.330212	0.330121	0.330715	0.330978	0.331366	0.332384	0.331858	0.332635	0.332635	0.333515	0.333424	0.333858	0.333538	0.334144	0.333332	0.334681	0.334349	0.334601	0.333847	0.334327	0.334395	0.334829	0.335367	0.335904	0.336384	0.337527
12	Aspergilis oryzae lipase	0	0.0510644	0.0938658	0.0991002	0.0993859	0.0996831	0.0999688	0.100792	0.101969	0.102757	0.103535	0.104838	0.105318	0.10654	0.106586	0.107512	0.108438	0.108975	0.109843	0.110678	0.111603	0.112438	0.114689	0.115524	0.117638	0.119901	0.121947	0.124118	0.125867	0.127684	0.12925	0.13061	0.131936	0.133421	0.134404	0.135776	0.136301	0.138359	0.13957	0.140416	0.140942	0.145056	0.145856	0.147136	0.148405	0.14973	0.15093	0.15269
13	Candita antarctica lipase A	0	0.0845398	0.119627	0.127604	0.129535	0.13061	0.131307	0.132873	0.133913	0.135536	0.136347	0.137616	0.137456	0.13805	0.137433	0.137959	0.138061	0.137513	0.13845	0.138519	0.138484	0.138656	0.139547	0.139101	0.13949	0.139696	0.139799	0.14013	0.140187	0.140222	0.140382	0.14061	0.140736	0.141033	0.141182	0.141387	0.140827	0.142062	0.142519	0.14261	0.142187	0.142884	0.142919	0.14389	0.14453	0.145433	0.146107	0.147605
14	Candita antarctica lipase B	0	0.110346	0.210864	0.246168	0.261197	0.266923	0.269071	0.269963	0.270374	0.271071	0.270991	0.271266	0.271517	0.271323	0.271174	0.271174	0.271174	0.271094	0.27114	0.271231	0.271517	0.271688	0.272603	0.272408	0.272637	0.272671	0.272843	0.273094	0.273128	0.273243	0.273609	0.273849	0.273997	0.274283	0.274329	0.27458	0.273929	0.27522	0.275517	0.275574	0.27506	0.275723	0.275883	0.276489	0.277071	0.277883	0.278352	0.27962
15	Rhizopus oryzae esterase	0	0.154885	0.129238	0.130427	0.128781	0.127261	0.127307	0.126735	0.129753	0.129124	0.129227	0.12901	0.12917	0.129307	0.129215	0.128804	0.128987	0.128381	0.128438	0.128015	0.127958	0.127593	0.128004	0.127981	0.127581	0.12757	0.126998	0.126735	0.126667	0.126118	0.125947	0.125661	0.125855	0.125307	0.125318	0.124781	0.124495	0.123467	0.124198	0.123798	0.123615	0.12245	0.122758	0.12229	0.122495	0.122564	0.12293	0.122632
16	Aspergilis oryzae phospholipase	0	0.0468586	0.0481615	0.0559446	0.0494644	0.0524016	0.0615333	0.0717051	0.0717851	0.0718422	0.0730994	0.0739794	0.0741852	0.074768	0.074848	0.0755109	0.0754881	0.0764595	0.0767567	0.0774767	0.077991	0.0788825	0.0801168	0.0805282	0.0809397	0.0817511	0.0818997	0.0832712	0.0834655	0.0840598	0.0850769	0.0854998	0.0862427	0.087157	0.0876256	0.0883913	0.0884027	0.0902085	0.0908485	0.0916714	0.0913628	0.0924714	0.0932258	0.0943915	0.0957744	0.0966087	0.0979345	0.0996602
17	Pseudomonas sp. lipoprotein lipase	0	0.147742	0.270957	0.271391	0.274683	0.276923	0.274191	0.272763	0.272626	0.273814	0.274786	0.276911	0.2785	0.280294	0.281517	0.283323	0.28458	0.28586	0.287449	0.288603	0.289598	0.29066	0.292318	0.292958	0.293906	0.294683	0.295506	0.296352	0.297004	0.297438	0.298295	0.298615	0.299255	0.299689	0.300009	0.300306	0.299895	0.300946	0.301369	0.301404	0.300866	0.301221	0.301507	0.301918	0.302489	0.303061	0.303461	0.304535
18	Bovine pancreas phospholipase	0	0.0528131	0.0986431	0.111523	0.112986	0.114301	0.114575	0.115672	0.116358	0.118598	0.121958	0.126232	0.129307	0.131033	0.13269	0.134621	0.135981	0.136964	0.137879	0.138576	0.13925	0.140164	0.141307	0.141604	0.142222	0.142622	0.142987	0.14365	0.143947	0.144256	0.144953	0.14533	0.145776	0.146302	0.146793	0.14717	0.146907	0.14837	0.149045	0.149433	0.148645	0.149628	0.149879	0.150828	0.15157	0.15261	0.153182	0.154793
	lysate	0	0.0728137	0.104963	0.114552	0.118381	0.120449	0.12205	0.123901	0.125352	0.127501	0.131204	0.133296	0.134918	0.136084	0.137079	0.138393	0.13965	0.140587	0.141684	0.142747	0.143719	0.144839	0.14645	0.147033	0.148005	0.148919	0.149662	0.150725	0.151799	0.152462	0.153536	0.154439	0.155559	0.156531	0.157125	0.157993	0.158176	0.159914	0.160919	0.161434	0.161502	0.162496	0.163171	0.164177	0.165285	0.166302	0.167411	0.168931
	MasterMix+BHET	0	0.0659392	0.0985116	0.0949115	0.0942944	0.0962487	0.107838	0.110466	0.110009	0.112478	0.112501	0.113769	0.114089	0.114272	0.114044	0.114512	0.114272	0.114626	0.114638	0.115346	0.115152	0.116512	0.116569	0.118649	0.116958	0.117895	0.118684	0.118387	0.118478	0.119004	0.119712	0.121872	0.121129	0.122341	0.12273	0.124878	0.122878	0.124581	0.125187	0.125735	0.125312	0.12617	0.126227	0.12721	0.12801	0.129118	0.129758	0.131153
	MaserMix No BHET	0	-0.00749966	0.0542965	0.0592453	0.0609025	0.0672684	0.0784459	0.0807202	0.082446	0.0849146	0.0857147	0.0866518	0.0869833	0.0874976	0.0877604	0.0881833	0.088309	0.088549	0.0891091	0.0900119	0.091052	0.0921377	0.0933606	0.0937263	0.0944121	0.0950978	0.0953835	0.0959893	0.0962864	0.0965493	0.0967664	0.097155	0.0973836	0.0976693	0.0979893	0.0982979	0.0983779	0.0986751	0.0988236	0.0989494	0.0991208	0.0992808	0.0993951	0.0995437	0.0996694	0.0999894	0.100012	0.100412
Trial 2
	Time (min)	0	14.9998	29.9998	44.9998	59.9998	74.9998	89.9998	105	120	135	150	165	180	195	210	225	240	255	270	285	300	315	330	345	360	375	390	405	420	435	450	465	480	495	510	525	540	555	570	585	600	615	630	645	660	675	690	705
1	T. fusca cutinase	0	0.053034	0.138111	0.161003	0.176158	0.179095	0.184307	0.184501	0.189644	0.188844	0.193827	0.193004	0.197621	0.196524	0.201987	0.201199	0.206182	0.205267	0.210227	0.208913	0.213908	0.212388	0.217599	0.215782	0.220182	0.218491	0.222982	0.220971	0.225382	0.223268	0.227908	0.225988	0.230434	0.228228	0.232388	0.230377	0.23416	0.232457	0.23728	0.234823	0.238263	0.236	0.240423	0.238514	0.243177	0.241223	0.245851	0.243817
2	I. sakiensis PETase	0	0.161841	0.188299	0.196231	0.206345	0.215603	0.22606	0.23046	0.237615	0.240324	0.246667	0.24861	0.253958	0.254907	0.259559	0.260233	0.264507	0.264736	0.268759	0.268599	0.272245	0.27205	0.275936	0.275113	0.278473	0.277491	0.280725	0.279868	0.282656	0.281342	0.284394	0.283182	0.285754	0.284496	0.286919	0.285582	0.287445	0.286737	0.289457	0.287777	0.289354	0.287982	0.290348	0.289468	0.29228	0.2914	0.294154	0.293308
3	501	0	0.0255017	0.0672859	0.0962811	0.110853	0.121688	0.132099	0.135939	0.142728	0.147128	0.153917	0.156717	0.161186	0.163815	0.167643	0.170535	0.174044	0.176055	0.179415	0.181415	0.184261	0.186021	0.188055	0.189495	0.191781	0.192798	0.194981	0.195736	0.197061	0.19801	0.199919	0.200627	0.201519	0.202319	0.203702	0.204559	0.205164	0.204399	0.205656	0.204044	0.205759	0.204433	0.207393	0.206833	0.209907	0.209062	0.211485	0.211439
4	702	0	0.0597961	0.144587	0.174565	0.18676	0.193412	0.196543	0.201195	0.205424	0.209721	0.212807	0.217058	0.218795	0.221367	0.222681	0.22483	0.225904	0.227927	0.229036	0.231024	0.23203	0.234076	0.235413	0.237642	0.238453	0.240156	0.240967	0.242842	0.243253	0.245013	0.245768	0.247425	0.248156	0.249722	0.250168	0.251859	0.251688	0.254111	0.254911	0.256191	0.255825	0.257734	0.257837	0.259848	0.260202	0.261905	0.262728	0.264648
5	703	0	0.0581275	0.144702	0.170131	0.180783	0.183663	0.188189	0.191572	0.194395	0.196955	0.199492	0.201423	0.203526	0.204772	0.206841	0.208646	0.209972	0.211629	0.213218	0.214578	0.216155	0.217504	0.219538	0.22027	0.222121	0.22307	0.224464	0.225596	0.226853	0.227847	0.229321	0.230407	0.23171	0.232876	0.234156	0.235242	0.23595	0.237527	0.238922	0.239127	0.239447	0.240453	0.241105	0.242133	0.243288	0.244042	0.24523	0.246259
6	705	0	0.0499863	0.0813016	0.0934962	0.0997936	0.103371	0.10744	0.111931	0.117497	0.122846	0.127863	0.130663	0.133532	0.135566	0.138252	0.140149	0.142241	0.143944	0.146206	0.147624	0.149544	0.151224	0.153395	0.154527	0.156595	0.157761	0.159487	0.160813	0.162241	0.163327	0.165121	0.16615	0.167601	0.168481	0.16999	0.170916	0.171727	0.173282	0.175042	0.175647	0.176116	0.177305	0.178447	0.179659	0.181305	0.182619	0.184025	0.185282
7	707	0	0.051053	0.0689164	0.0758652	0.0835455	0.0893171	0.0921514	0.0950887	0.0957287	0.097123	0.0972602	0.0973173	0.0978888	0.0988831	0.0995574	0.10126	0.102609	0.103889	0.105443	0.10702	0.108438	0.109992	0.111912	0.113021	0.114529	0.115672	0.117009	0.118381	0.119364	0.120461	0.121764	0.122804	0.12381	0.124724	0.125478	0.126324	0.126427	0.127821	0.128941	0.12933	0.129227	0.130358	0.130884	0.132141	0.133101	0.134267	0.13517	0.136336
8	708	0	0.0523712	0.0790348	0.0920295	0.0978126	0.10203	0.105573	0.109013	0.112373	0.11771	0.121528	0.124465	0.128111	0.131848	0.134625	0.137208	0.139437	0.141494	0.143483	0.145437	0.147026	0.149071	0.151174	0.15258	0.154466	0.15586	0.15738	0.158969	0.16034	0.161632	0.163289	0.164603	0.16578	0.167243	0.16842	0.169575	0.170135	0.172089	0.173598	0.174501	0.174844	0.176352	0.177221	0.178821	0.180249	0.181712	0.183049	0.184672
9	715	0	0.0481196	0.14634	0.174455	0.184284	0.188101	0.18905	0.190844	0.192341	0.193633	0.194673	0.196993	0.197987	0.199473	0.201256	0.202959	0.204662	0.206285	0.208045	0.209645	0.211245	0.212822	0.214913	0.216102	0.217759	0.218971	0.220411	0.221839	0.222914	0.224136	0.225737	0.226937	0.228182	0.229417	0.230708	0.231885	0.23264	0.234823	0.236445	0.237223	0.237223	0.238377	0.238948	0.240126	0.2412	0.2424	0.243589	0.244857
10	Geobacillus stearothermophilis esterase	0	0.150287	0.213843	0.247284	0.263993	0.278268	0.292142	0.296783	0.301526	0.307606	0.3118	0.31564	0.318189	0.32052	0.322178	0.324041	0.325218	0.326303	0.327321	0.328269	0.329721	0.330784	0.331812	0.332281	0.333001	0.333332	0.333789	0.334395	0.334509	0.335069	0.335618	0.335892	0.336075	0.336441	0.336487	0.336978	0.336521	0.337618	0.338144	0.338292	0.337801	0.338555	0.338498	0.339458	0.340121	0.34083	0.341321	0.342407
11	Bacillus subilis esterase	0	0.0801815	0.155944	0.186813	0.197934	0.203785	0.207774	0.211054	0.212871	0.214814	0.215889	0.21742	0.218494	0.219294	0.220003	0.221112	0.222015	0.223146	0.224186	0.225055	0.225706	0.22694	0.227958	0.228689	0.229592	0.23038	0.231329	0.232346	0.232815	0.233718	0.234483	0.235318	0.235752	0.236369	0.236884	0.237661	0.237649	0.239089	0.239912	0.240392	0.240232	0.241341	0.241638	0.242918	0.243924	0.244907	0.245844	0.247044
12	Aspergilis oryzae lipase	0	0.00325724	0.0159319	0.0185377	0.0233264	0.0240922	0.0245036	0.0251322	0.0250865	0.0259551	0.0264465	0.0269266	0.027258	0.0272694	0.0277037	0.0281266	0.0284237	0.0286066	0.0290752	0.0294409	0.0296352	0.0303324	0.0311667	0.0311553	0.0318753	0.0320353	0.032321	0.0328925	0.0331782	0.033441	0.0340353	0.0345954	0.0347097	0.035224	0.0354411	0.0358754	0.0357725	0.0369611	0.0376697	0.0379326	0.0377497	0.0385269	0.0387441	0.0398755	0.0407441	0.0416699	0.0424585	0.0434985
13	Candita antarctica lipase A	0	0.00836597	0.0215778	0.0248122	0.0254408	0.0258979	0.0259322	0.026458	0.0266408	0.0270523	0.027418	0.0276009	0.0271666	0.0271551	0.0268351	0.0269723	0.0267094	0.026858	0.0268123	0.0267437	0.0267665	0.026938	0.0273151	0.0272237	0.0273837	0.027258	0.0273266	0.0277151	0.0275094	0.027498	0.0278752	0.0280352	0.0280237	0.0283552	0.0283209	0.0285152	0.0279094	0.029018	0.0294523	0.0294866	0.0289038	0.0295438	0.0294981	0.0303438	0.0309952	0.0316696	0.0322067	0.0330867
14	Candita antarctica lipase B	0	0.00128004	0.0378069	0.0589047	0.0700593	0.0786196	0.0861398	0.0929286	0.0989174	0.104815	0.109489	0.114026	0.117764	0.120895	0.12381	0.126473	0.128701	0.13061	0.132301	0.133924	0.135341	0.136656	0.138073	0.138919	0.139867	0.140382	0.141216	0.141764	0.142107	0.14261	0.143262	0.143639	0.143822	0.144244	0.144347	0.144656	0.144153	0.145296	0.14581	0.14589	0.145376	0.14605	0.145787	0.146462	0.147056	0.147753	0.148233	0.148999
15	Rhizopus oryzae esterase	0	-0.0900371	-0.102106	-0.105123	-0.10758	-0.110392	-0.111775	-0.112781	-0.112792	-0.113718	-0.114861	-0.115615	-0.116552	-0.117341	-0.118095	-0.119318	-0.119889	-0.120769	-0.121558	-0.122358	-0.12301	-0.12405	-0.124495	-0.124975	-0.125512	-0.126187	-0.126735	-0.127398	-0.128004	-0.128564	-0.129318	-0.129581	-0.130141	-0.13077	-0.131216	-0.131856	-0.132347	-0.133467	-0.132987	-0.13325	-0.133878	-0.13501	-0.135204	-0.135593	-0.13541	-0.135341	-0.135433	-0.135501
16	Aspergilis oryzae phospholipase	0	-0.0171434	0.0037144	0.00830883	0.00269723	-0.0107546	-0.0132461	-0.0111432	-0.0103775	-0.0105603	-0.0119204	-0.010446	-0.0111889	-0.0110861	-0.0116346	-0.0111089	-0.0115318	-0.0119204	-0.0108918	-0.010766	-0.00973745	-0.00954315	-0.00872027	-0.00851455	-0.00804596	-0.00800025	-0.00788596	-0.00720022	-0.0069145	-0.00650306	-0.00589733	-0.00533731	-0.0053716	-0.00485729	-0.004503	-0.00411441	-0.00418299	-0.00280009	-0.00230864	-0.00179434	-0.00218293	-0.00114289	-0.0010286	0.000194292	0.00109718	0.000525731	0.0026858	0.00410298
17	Pseudomonas sp. lipoprotein lipase	0	0.120381	0.190875	0.192029	0.194909	0.1974	0.196109	0.198749	0.1998	0.199698	0.200063	0.202509	0.203755	0.205469	0.207001	0.208738	0.209744	0.211241	0.212589	0.213755	0.215012	0.216258	0.217504	0.218475	0.21939	0.219835	0.220795	0.221458	0.222041	0.222567	0.22339	0.223573	0.224064	0.224327	0.22459	0.224853	0.224236	0.225218	0.225767	0.22579	0.225161	0.225573	0.225538	0.22611	0.226556	0.227093	0.227321	0.227984
18	Bovine pancreas phospholipase	0	-0.00773738	0.0181606	0.0290066	0.0317496	0.0326639	0.0330067	0.0334753	0.0340011	0.0351097	0.0353611	0.0361611	0.0365611	0.0370412	0.0372583	0.0378069	0.0379783	0.0383326	0.0387326	0.0388926	0.0390755	0.0397498	0.0402984	0.040607	0.0411327	0.0412241	0.0416013	0.0421042	0.0421956	0.042687	0.0430756	0.0434414	0.0436471	0.0443671	0.0445157	0.0448014	0.0445042	0.0457957	0.0464586	0.0469843	0.0461157	0.0470186	0.0470529	0.0480815	0.0488015	0.0496473	0.050173	0.0515102
	lysate	0	0.0298981	0.041967	0.0450071	0.0476358	0.0489958	0.049773	0.0507444	0.0511444	0.0520359	0.0523902	0.0530988	0.0531559	0.0533959	0.0533845	0.0536931	0.0538302	0.0539674	0.054116	0.0542988	0.0544588	0.0547788	0.0553274	0.0553617	0.0556246	0.0557617	0.0559217	0.0562646	0.056516	0.0567103	0.0571675	0.0575104	0.0579104	0.0583561	0.0585275	0.0590761	0.0589161	0.0602647	0.0612705	0.0616705	0.0617276	0.062962	0.0635791	0.0649506	0.0664135	0.0675678	0.0688136	0.0701736
	MasterMix+BHET	0	0.0316524	0.0443157	0.0265665	0.0148405	0.0078231	0.00538874	0.0103375	0.0114461	0.0116404	0.0124861	0.013389	0.0135719	0.013709	0.013789	0.014269	0.0142462	0.0145205	0.0145205	0.015149	0.0148976	0.0161776	0.0159148	0.0180863	0.0165662	0.0171834	0.0180291	0.0172977	0.0173434	0.0174805	0.0177777	0.0192635	0.0180634	0.0186806	0.0186234	0.0202235	0.0181663	0.0193549	0.0197206	0.0199035	0.0193892	0.0199835	0.0198692	0.0207835	0.0214921	0.0222578	0.0227264	0.0237436
	MaserMix No BHET	0	0.00058859	0.0381783	0.0395727	0.0393555	0.0392641	0.0397212	0.0435156	0.0479272	0.0491272	0.0507044	0.0524759	0.0540531	0.0550017	0.0556189	0.0562246	0.0565103	0.0571275	0.0574475	0.0578247	0.0579847	0.0582361	0.058499	0.0587161	0.0588533	0.0590247	0.0592761	0.0594818	0.0595047	0.0598819	0.0599161	0.0601333	0.060179	0.0603504	0.0604304	0.0605905	0.060739	0.060819	0.0609333	0.0609905	0.0611276	0.0613448	0.0612762	0.0615505	0.0615962	0.0617676	0.0616419	0.0618248
Average
	Time (min)	0	14.9998	29.9998	44.9998	59.9998	74.9998	89.9998	105	120	135	150	165	180	195	210	225	240	255	270	285	300	315	330	345	360	375	390	405	420	435	450	465	480	495	510	525	540	555	570	585	600	615	630	645	660	675	690	705
1	T. fusca cutinase	0	0.0766462	0.174724	0.201061	0.216348	0.221176	0.228239	0.2302	0.235954	0.236394	0.241017	0.241006	0.245114	0.2446	0.248663	0.248149	0.252052	0.251389	0.25528	0.254475	0.258389	0.257395	0.261612	0.260315	0.263949	0.262858	0.266355	0.265143	0.268692	0.267292	0.271069	0.269875	0.273401	0.272104	0.275407	0.274109	0.27699	0.276275	0.280047	0.278481	0.281087	0.279847	0.283293	0.282218	0.285933	0.28491	0.288607	0.28767
2	I. sakiensis PETase	0	0.190059	0.232729	0.240512	0.256484	0.263473	0.271667	0.275582	0.281611	0.284645	0.290045	0.2924	0.297091	0.298634	0.302388	0.303846	0.307423	0.308337	0.31168	0.312303	0.315355	0.315932	0.31928	0.319189	0.321932	0.321806	0.324246	0.324241	0.326361	0.325909	0.328246	0.327864	0.329846	0.329424	0.331201	0.330646	0.331818	0.332047	0.333978	0.333098	0.334007	0.333555	0.335155	0.335024	0.337127	0.337058	0.339121	0.33923
3	501	0	0.0301905	0.0669487	0.0954553	0.105307	0.119096	0.125648	0.133525	0.136271	0.143994	0.146377	0.152751	0.1528	0.158966	0.158286	0.1647	0.163712	0.169303	0.168115	0.173583	0.172055	0.177249	0.174732	0.179858	0.177698	0.182469	0.179987	0.184532	0.181355	0.186327	0.18383	0.188215	0.18477	0.189575	0.186515	0.191324	0.187478	0.19185	0.18893	0.192273	0.188767	0.192724	0.190235	0.19457	0.19233	0.196678	0.193593	0.198699
4	702	0	0.0853798	0.181394	0.212967	0.225613	0.234219	0.239807	0.244808	0.247945	0.251825	0.254105	0.257865	0.259442	0.261991	0.262957	0.265231	0.266157	0.268243	0.269174	0.271334	0.272254	0.274403	0.275751	0.277997	0.278689	0.280552	0.281129	0.283175	0.28346	0.285289	0.285906	0.287666	0.288243	0.289986	0.290243	0.292043	0.291672	0.294266	0.294838	0.296192	0.295683	0.297586	0.297335	0.299204	0.299249	0.300969	0.301495	0.303644
5	703	0	0.0808197	0.179286	0.208835	0.220315	0.224698	0.228521	0.231579	0.234133	0.236556	0.239019	0.24151	0.244516	0.246779	0.248853	0.250859	0.252356	0.253928	0.255591	0.257014	0.258625	0.260111	0.262277	0.2631	0.264911	0.26598	0.267317	0.268545	0.26982	0.270803	0.272203	0.273306	0.274489	0.27562	0.276723	0.277689	0.278203	0.279872	0.28114	0.281426	0.281752	0.282815	0.2835	0.284609	0.285803	0.286746	0.287912	0.289266
6	705	0	0.0803587	0.0977821	0.111594	0.118674	0.1252	0.129966	0.136103	0.141103	0.147401	0.151281	0.155664	0.15779	0.161235	0.162693	0.165841	0.166836	0.169464	0.170316	0.17279	0.173304	0.175733	0.17651	0.178413	0.17871	0.18071	0.180705	0.182813	0.182488	0.184373	0.184316	0.186242	0.185979	0.187693	0.187373	0.189225	0.188179	0.190791	0.190608	0.192174	0.190836	0.193065	0.192362	0.194665	0.194471	0.196779	0.196374	0.199008
7	707	0	0.0774824	0.114575	0.125118	0.131696	0.136221	0.138496	0.14133	0.142073	0.14345	0.143559	0.143473	0.144416	0.145753	0.146582	0.148216	0.149325	0.150456	0.151713	0.152776	0.153748	0.154753	0.156039	0.156336	0.157165	0.157513	0.158028	0.158628	0.158908	0.159285	0.159954	0.160336	0.160742	0.161176	0.161451	0.161879	0.161508	0.162571	0.163268	0.163359	0.162954	0.163651	0.163994	0.164851	0.165588	0.166457	0.167171	0.168331
8	708	0	-0.00120766	0.0363649	0.046051	0.0506168	0.0670516	0.0599428	0.0778062	0.0818064	0.0876008	0.0915267	0.0942925	0.097584	0.10039	0.102213	0.105384	0.106979	0.109882	0.11235	0.115327	0.11727	0.119945	0.121556	0.124179	0.125608	0.127328	0.129505	0.130722	0.132545	0.133722	0.136248	0.13746	0.139528	0.140602	0.141671	0.143517	0.144677	0.146877	0.148786	0.149757	0.149797	0.15218	0.153123	0.155569	0.156249	0.1581	0.159574	0.161969
9	715	0	0.0355763	0.149854	0.180244	0.18945	0.19389	0.194736	0.196273	0.197696	0.199039	0.199444	0.201867	0.202507	0.20433	0.206787	0.208027	0.209816	0.21249	0.214862	0.215736	0.217862	0.219056	0.221651	0.222274	0.224382	0.225611	0.227079	0.228462	0.229737	0.231382	0.2326	0.234131	0.235445	0.237057	0.234343	0.235383	0.235994	0.238337	0.239611	0.240417	0.240954	0.242126	0.243131	0.24424	0.245674	0.24704	0.248452	0.24952
10	Geobacillus stearothermophilis esterase	0	0.186688	0.252135	0.290942	0.312652	0.329264	0.340338	0.34627	0.351641	0.357139	0.360979	0.364436	0.366916	0.369373	0.370636	0.372065	0.373059	0.374122	0.375248	0.376288	0.377539	0.378568	0.379814	0.380219	0.380997	0.381442	0.381991	0.382688	0.382997	0.383557	0.384168	0.384585	0.384934	0.385591	0.385768	0.386294	0.38598	0.387185	0.38774	0.38794	0.387551	0.388305	0.38842	0.389311	0.389997	0.390791	0.391328	0.392563
11	Bacillus subilis esterase	0	0.138446	0.213294	0.242581	0.252187	0.256678	0.259313	0.261901	0.26337	0.265016	0.266124	0.267399	0.268456	0.269216	0.269667	0.27093	0.271953	0.273525	0.275108	0.276296	0.277113	0.277982	0.279085	0.279405	0.280153	0.280679	0.281348	0.282365	0.282336	0.283176	0.283559	0.284416	0.284588	0.285114	0.285211	0.285902	0.285491	0.286885	0.287131	0.287497	0.287039	0.287834	0.288017	0.288874	0.289645	0.290405	0.291114	0.292285
12	Aspergilis oryzae lipase	0	0.0271608	0.0548988	0.058819	0.0613562	0.0618876	0.0622362	0.062962	0.0635277	0.0643563	0.0649906	0.065882	0.0662878	0.0669049	0.0671449	0.0678193	0.0684307	0.0687907	0.0694593	0.0700593	0.0706193	0.0713851	0.072928	0.0733394	0.0747566	0.0759681	0.0771338	0.0785053	0.0795225	0.0805625	0.0816425	0.0826026	0.0833226	0.0843226	0.0849226	0.0858255	0.086037	0.0876599	0.0886199	0.0891742	0.0893456	0.0917914	0.0923	0.0935058	0.0945744	0.0957001	0.0966944	0.0980945
13	Candita antarctica lipase A	0	0.0464529	0.0706022	0.0762081	0.0774881	0.0782539	0.0786196	0.0796653	0.0802768	0.081294	0.0818825	0.0826083	0.0823111	0.0826026	0.082134	0.0824654	0.0823854	0.0821854	0.0826311	0.0826311	0.0826254	0.0827969	0.0834312	0.0831626	0.0834369	0.0834769	0.0835626	0.0839226	0.0838483	0.0838597	0.0841283	0.0843226	0.0843798	0.0846941	0.0847512	0.0849512	0.0843683	0.0855398	0.0859855	0.0860484	0.0855455	0.0862141	0.0862084	0.087117	0.0877627	0.0885513	0.0891571	0.0903457
14	Candita antarctica lipase B	0	0.0558132	0.124335	0.152536	0.165628	0.172771	0.177606	0.181446	0.184646	0.187943	0.19024	0.192646	0.19464	0.196109	0.197492	0.198823	0.199938	0.200852	0.201721	0.202578	0.203429	0.204172	0.205338	0.205664	0.206252	0.206526	0.207029	0.207429	0.207618	0.207926	0.208435	0.208744	0.208909	0.209264	0.209338	0.209618	0.209041	0.210258	0.210664	0.210732	0.210218	0.210887	0.210835	0.211475	0.212064	0.212818	0.213292	0.21431
15	Rhizopus oryzae esterase	0	0.0324239	0.0135661	0.0126518	0.0106003	0.00843455	0.00776596	0.00697736	0.00848026	0.0077031	0.00718308	0.00669735	0.00630877	0.00598304	0.00556017	0.004743	0.00454871	0.00380583	0.00344011	0.00282866	0.00247436	0.00177148	0.00175434	0.0015029	0.00103432	0.00069145	0.000131433	-0.000331439	-0.000668592	-0.0012229	-0.00168577	-0.00196006	-0.00214292	-0.00273151	-0.00294866	-0.00353725	-0.00392584	-0.00500016	-0.00439442	-0.00472586	-0.00513159	-0.0062802	-0.00622305	-0.00665164	-0.00645734	-0.00638877	-0.00625162	-0.00643449
16	Aspergilis oryzae phospholipase	0	0.0148576	0.0259379	0.0321267	0.0260808	0.0208235	0.0241436	0.0302809	0.0307038	0.030641	0.0305895	0.0317667	0.0314981	0.031841	0.0316067	0.032201	0.0319781	0.0322696	0.0329325	0.0333553	0.0341268	0.0346696	0.0356983	0.0360068	0.0364468	0.0368754	0.0370069	0.0380355	0.0382755	0.0387783	0.0395898	0.0400812	0.0404355	0.0411499	0.0415613	0.0421385	0.0421099	0.0437042	0.0442699	0.0449385	0.04459	0.0456643	0.0460986	0.0472929	0.0484358	0.0485672	0.0503101	0.0518816
17	Pseudomonas sp. lipoprotein lipase	0	0.134061	0.230916	0.23171	0.234796	0.237162	0.23515	0.235756	0.236213	0.236756	0.237425	0.23971	0.241127	0.242882	0.244259	0.246031	0.247162	0.248551	0.250019	0.251179	0.252305	0.253459	0.254911	0.255717	0.256648	0.257259	0.258151	0.258905	0.259522	0.260002	0.260842	0.261094	0.26166	0.262008	0.2623	0.26258	0.262065	0.263082	0.263568	0.263597	0.263014	0.263397	0.263522	0.264014	0.264523	0.265077	0.265391	0.26626
18	Bovine pancreas phospholipase	0	0.0225378	0.0584018	0.070265	0.072368	0.0734823	0.0737909	0.0745737	0.0751795	0.0768538	0.0786596	0.0811968	0.082934	0.0840369	0.0849741	0.0862141	0.0869798	0.0876484	0.0883056	0.0887342	0.0891628	0.0899571	0.0908028	0.0911057	0.0916771	0.0919229	0.0922943	0.0928772	0.0930715	0.0934715	0.0940144	0.0943858	0.0947115	0.0953344	0.0956544	0.0959858	0.0957058	0.097083	0.0977516	0.0982088	0.0973802	0.0983231	0.0984659	0.0994545	0.100186	0.101129	0.101677	0.103152
	lysate	0	0.0513559	0.0734651	0.0797796	0.0830083	0.0847226	0.0859112	0.0873227	0.0882485	0.0897685	0.0917971	0.0931972	0.0940372	0.0947401	0.0952315	0.096043	0.0967402	0.0972773	0.0979002	0.0985231	0.0990888	0.0998088	0.100889	0.101197	0.101815	0.10234	0.102792	0.103495	0.104158	0.104586	0.105352	0.105975	0.106735	0.107443	0.107826	0.108535	0.108546	0.110089	0.111095	0.111552	0.111615	0.112729	0.113375	0.114564	0.115849	0.116935	0.118112	0.119552
	MasterMix+BHET	0	0.0487958	0.0714136	0.060739	0.0545674	0.0520359	0.0566132	0.0604019	0.0607276	0.0620591	0.0624934	0.0635791	0.0638306	0.0639906	0.0639163	0.0643906	0.0642591	0.0645734	0.0645792	0.0652477	0.0650249	0.0663449	0.0662421	0.0683678	0.0667621	0.0675392	0.0683564	0.0678421	0.0679107	0.0682421	0.068745	0.0705679	0.0695964	0.0705108	0.0706765	0.0725508	0.0705222	0.071968	0.0724537	0.0728194	0.0723508	0.0730766	0.073048	0.0739966	0.0747509	0.0756881	0.0762424	0.0774481
	MaserMix No BHET	0	-0.00345554	0.0462374	0.049409	0.050129	0.0532662	0.0590836	0.0621179	0.0651866	0.0670209	0.0682095	0.0695639	0.0705182	0.0712496	0.0716897	0.072204	0.0724097	0.0728383	0.0732783	0.0739183	0.0745183	0.0751869	0.0759298	0.0762212	0.0766327	0.0770613	0.0773298	0.0777356	0.0778956	0.0782156	0.0783413	0.0786442	0.0787813	0.0790099	0.0792099	0.0794442	0.0795585	0.0797471	0.0798785	0.0799699	0.0801242	0.0803128	0.0803356	0.0805471	0.0806328	0.0808785	0.0808271	0.0811185
[truncated: 50 more columns]

## Sheet: µmol Ester Cleaved
Trial 1
	Time (min)	0	15	30	45	60	75	90	105	120	135	150	165	180	195	210	225	240	255	270	285	300	315	330	345	360	375	390	405	420	435	450	465	480	495	510	525	540	555	570	585	600	615	630	645	660	675	690	705
1	T. fusca cutinase	0	0.102264	0.215563	0.245942	0.261668	0.268523	0.277616	0.281416	0.287909	0.289623	0.293971	0.294787	0.298459	0.298529	0.301245	0.301001	0.30388	0.30346	0.30634	0.306037	0.308928	0.30845	0.311737	0.310945	0.313871	0.313369	0.315922	0.315503	0.318242	0.317543	0.320515	0.320037	0.322695	0.322299	0.324794	0.324199	0.326216	0.326496	0.32927	0.328582	0.330389	0.330168	0.332686	0.332441	0.335262	0.335169	0.33799	0.338153
2	I. sakiensis PETase	0	0.222643	0.282702	0.290489	0.312755	0.31757	0.32362	0.327117	0.332118	0.335546	0.340092	0.342913	0.347028	0.349208	0.352123	0.354408	0.357345	0.358977	0.361694	0.363127	0.365634	0.367009	0.369877	0.37053	0.372698	0.373444	0.375123	0.375986	0.377466	0.377886	0.379541	0.379996	0.381418	0.381838	0.382992	0.383225	0.383715	0.384904	0.386069	0.385988	0.386233	0.386711	0.387562	0.388191	0.389613	0.390371	0.39177	0.392854
3	501	0	0.0355768	0.0679438	0.0965222	0.101756	0.118835	0.12158	0.133733	0.13241	0.143677	0.141613	0.151761	0.147302	0.1572	0.151907	0.162043	0.156448	0.165803	0.159951	0.169067	0.163046	0.171847	0.164637	0.173625	0.166887	0.175583	0.168292	0.176796	0.168962	0.178136	0.171095	0.17932	0.171381	0.180369	0.172716	0.181651	0.173188	0.182887	0.175648	0.184111	0.17521	0.184635	0.176539	0.185953	0.178247	0.187981	0.179215	0.189677
4	702	0	0.113183	0.222565	0.256395	0.269755	0.280526	0.288733	0.294189	0.296275	0.299808	0.301312	0.304646	0.306091	0.308667	0.309297	0.311745	0.312538	0.314729	0.315499	0.317877	0.318728	0.321024	0.322412	0.32472	0.325303	0.327366	0.327716	0.329977	0.330141	0.332076	0.332565	0.334465	0.334897	0.336855	0.336925	0.338872	0.338289	0.34111	0.34146	0.342917	0.342253	0.344188	0.34357	0.34533	0.345062	0.346834	0.347067	0.349492
5	703	0	0.105582	0.218147	0.25249	0.265045	0.271049	0.274231	0.277017	0.279349	0.28168	0.284117	0.287229	0.291216	0.294562	0.296684	0.298933	0.300635	0.302151	0.303923	0.305438	0.307117	0.308772	0.311115	0.312048	0.313855	0.315067	0.316373	0.317725	0.319043	0.320033	0.321386	0.322528	0.323612	0.324731	0.325676	0.326538	0.326865	0.32866	0.329826	0.330199	0.330537	0.331679	0.332414	0.333626	0.334885	0.336039	0.337205	0.338919
6	705	0	0.112946	0.116548	0.132285	0.140306	0.14997	0.155542	0.163481	0.168004	0.175395	0.178193	0.184278	0.185689	0.190643	0.190876	0.195364	0.195259	0.198885	0.198314	0.201916	0.201006	0.204247	0.203618	0.206346	0.204842	0.207733	0.205961	0.20891	0.206789	0.209528	0.207581	0.210461	0.208444	0.211044	0.208852	0.211685	0.208724	0.212466	0.210298	0.212874	0.209668	0.213002	0.210402	0.213865	0.21179	0.215159	0.212897	0.216989
7	707	0	0.10599	0.163438	0.177859	0.183443	0.186788	0.188537	0.191323	0.192186	0.193573	0.193654	0.193421	0.194762	0.196476	0.197478	0.199075	0.199961	0.200964	0.201943	0.202503	0.203039	0.203505	0.20417	0.203645	0.203797	0.203342	0.203027	0.202852	0.202421	0.202071	0.202106	0.201826	0.201628	0.201582	0.201372	0.201383	0.200521	0.201267	0.201547	0.201337	0.200614	0.200882	0.201045	0.201512	0.202036	0.202619	0.203155	0.204333
8	708	0	-0.0558822	-0.00643106	7.38309e-05	0.00348948	0.0327148	0.0145991	0.0475315	0.0522645	0.0586411	0.0627562	0.0654025	0.0683985	0.0703103	0.0711963	0.0750316	0.0760108	0.0798345	0.0828421	0.0869222	0.0892654	0.0926344	0.0937769	0.0976938	0.0986847	0.100771	0.103662	0.104525	0.106845	0.107929	0.111391	0.112522	0.115541	0.116241	0.11722	0.119808	0.121603	0.124098	0.126453	0.127514	0.127246	0.130568	0.131605	0.134963	0.134893	0.137178	0.138821	0.142051
9	715	0	0.0234938	0.156436	0.189753	0.198508	0.203672	0.20443	0.205736	0.207111	0.208533	0.2083	0.210876	0.211168	0.213371	0.216565	0.217358	0.21927	0.22307	0.226113	0.226264	0.228969	0.229797	0.232956	0.233014	0.235625	0.236896	0.238423	0.239787	0.241291	0.243401	0.244252	0.246152	0.247563	0.249591	0.242736	0.243657	0.244135	0.246688	0.247633	0.248484	0.249579	0.250792	0.252261	0.253321	0.255152	0.256714	0.258381	0.259267
10	Geobacillus stearothermophilis esterase	0	0.227551	0.296237	0.341293	0.368536	0.387865	0.396305	0.403672	0.409792	0.414805	0.418361	0.421497	0.423956	0.426591	0.427477	0.428491	0.429319	0.43038	0.431639	0.432793	0.433865	0.434879	0.436372	0.436721	0.437572	0.438143	0.438796	0.439601	0.440114	0.440685	0.441373	0.441944	0.442468	0.443436	0.443751	0.444322	0.444147	0.445488	0.446082	0.446339	0.446047	0.446817	0.447108	0.447947	0.44867	0.449568	0.450162	0.451573
11	Bacillus subilis esterase	0	0.200645	0.276057	0.304315	0.312569	0.315763	0.317069	0.319004	0.320146	0.321522	0.322688	0.323725	0.324786	0.32552	0.325718	0.327164	0.32833	0.330381	0.33255	0.334089	0.335091	0.335604	0.336816	0.336723	0.337329	0.337597	0.337994	0.339031	0.338495	0.339288	0.339288	0.340185	0.340092	0.340535	0.340209	0.340827	0.339999	0.341374	0.341036	0.341293	0.340523	0.341013	0.341083	0.341526	0.342074	0.342622	0.343111	0.344277
12	Aspergilis oryzae lipase	0	0.0520857	0.0957431	0.101082	0.101374	0.101677	0.101968	0.102808	0.104008	0.104813	0.105605	0.106934	0.107424	0.108671	0.108718	0.109662	0.110606	0.111154	0.11204	0.112891	0.113836	0.114687	0.116983	0.117834	0.119991	0.122299	0.124386	0.126601	0.128384	0.130238	0.131835	0.133222	0.134574	0.13609	0.137092	0.138491	0.139027	0.141126	0.142361	0.143224	0.14376	0.147957	0.148773	0.150079	0.151373	0.152725	0.153949	0.155744
13	Candita antarctica lipase A	0	0.0862306	0.122019	0.130156	0.132126	0.133222	0.133933	0.13553	0.136591	0.138246	0.139074	0.140368	0.140205	0.140811	0.140182	0.140718	0.140823	0.140263	0.141219	0.141289	0.141254	0.141429	0.142338	0.141883	0.14228	0.14249	0.142595	0.142933	0.142991	0.143026	0.143189	0.143422	0.143551	0.143854	0.144005	0.144215	0.143644	0.144903	0.145369	0.145462	0.145031	0.145742	0.145777	0.146768	0.147421	0.148342	0.14903	0.150557
14	Candita antarctica lipase B	0	0.112553	0.215081	0.251091	0.266421	0.272261	0.274453	0.275362	0.275782	0.276493	0.276411	0.276691	0.276947	0.276749	0.276598	0.276598	0.276598	0.276516	0.276563	0.276656	0.276947	0.277122	0.278055	0.277857	0.27809	0.278125	0.2783	0.278556	0.278591	0.278708	0.279081	0.279325	0.279477	0.279768	0.279815	0.280072	0.279407	0.280724	0.281027	0.281086	0.280561	0.281237	0.281401	0.282018	0.282613	0.283441	0.283919	0.285213
15	Rhizopus oryzae esterase	0	0.157983	0.131823	0.133035	0.131357	0.129806	0.129853	0.12927	0.132348	0.131706	0.131811	0.13159	0.131753	0.131893	0.1318	0.13138	0.131567	0.130949	0.131007	0.130576	0.130517	0.130144	0.130564	0.130541	0.130133	0.130121	0.129538	0.12927	0.1292	0.128641	0.128466	0.128174	0.128372	0.127813	0.127825	0.127277	0.126985	0.125936	0.126682	0.126274	0.126088	0.124899	0.125213	0.124735	0.124945	0.125015	0.125388	0.125085
16	Aspergilis oryzae phospholipase	0	0.0477958	0.0491247	0.0570635	0.0504537	0.0534497	0.062764	0.0731392	0.0732208	0.0732791	0.0745614	0.075459	0.0756689	0.0762634	0.076345	0.0770211	0.0769978	0.0779887	0.0782918	0.0790262	0.0795508	0.0804601	0.0817191	0.0821388	0.0825585	0.0833861	0.0835377	0.0849366	0.0851348	0.085741	0.0867785	0.0872098	0.0879675	0.0889001	0.0893781	0.0901591	0.0901708	0.0920127	0.0926655	0.0935048	0.0931901	0.0943209	0.0950903	0.0962793	0.0976899	0.0985409	0.0998932	0.101653
17	Pseudomonas sp. lipoprotein lipase	0	0.150697	0.276376	0.276819	0.280176	0.282461	0.279675	0.278218	0.278078	0.279291	0.280281	0.28245	0.28407	0.2859	0.287148	0.28899	0.290272	0.291578	0.293198	0.294375	0.29539	0.296474	0.298164	0.298817	0.299784	0.300577	0.301416	0.302279	0.302944	0.303387	0.304261	0.304587	0.30524	0.305683	0.30601	0.306313	0.305893	0.306965	0.307397	0.307432	0.306884	0.307245	0.307537	0.307956	0.308539	0.309122	0.30953	0.310626
18	Bovine pancreas phospholipase	0	0.0538693	0.100616	0.113754	0.115246	0.116587	0.116866	0.117986	0.118685	0.12097	0.124397	0.128757	0.131893	0.133653	0.135344	0.137314	0.138701	0.139704	0.140636	0.141347	0.142035	0.142968	0.144133	0.144436	0.145066	0.145474	0.145847	0.146523	0.146826	0.147141	0.147852	0.148237	0.148691	0.149228	0.149729	0.150114	0.149846	0.151338	0.152026	0.152422	0.151618	0.15262	0.152877	0.153844	0.154602	0.155663	0.156246	0.157889
	lysate	0	0.07427	0.107063	0.116843	0.120748	0.122858	0.12449	0.126379	0.12786	0.130051	0.133828	0.135961	0.137617	0.138806	0.13982	0.141161	0.142443	0.143399	0.144518	0.145602	0.146593	0.147736	0.149379	0.149974	0.150965	0.151897	0.152655	0.153739	0.154835	0.155511	0.156607	0.157528	0.15867	0.159661	0.160267	0.161153	0.16134	0.163112	0.164138	0.164662	0.164732	0.165746	0.166434	0.16746	0.168591	0.169628	0.170759	0.17231
	MasterMix+BHET	0	0.067258	0.100482	0.0968098	0.0961802	0.0981737	0.109994	0.112676	0.112209	0.114727	0.114751	0.116045	0.116371	0.116558	0.116324	0.116802	0.116558	0.116919	0.116931	0.117653	0.117455	0.118842	0.118901	0.121022	0.119297	0.120253	0.121057	0.120754	0.120848	0.121384	0.122107	0.12431	0.123552	0.124788	0.125184	0.127376	0.125336	0.127073	0.12769	0.12825	0.127819	0.128693	0.128751	0.129754	0.13057	0.131701	0.132353	0.133776
	MaserMix No BHET	0	-0.00764965	0.0553825	0.0604302	0.0621205	0.0686137	0.0800148	0.0823346	0.0840949	0.0866129	0.087429	0.0883849	0.0887229	0.0892475	0.0895157	0.089947	0.0900752	0.09032	0.0908912	0.0918122	0.092873	0.0939805	0.0952278	0.0956009	0.0963003	0.0969998	0.0972912	0.0979091	0.0982122	0.0984803	0.0987018	0.0990981	0.0993313	0.0996227	0.0999491	0.100264	0.100345	0.100649	0.1008	0.100928	0.101103	0.101266	0.101383	0.101535	0.101663	0.101989	0.102012	0.102421
Trial 2
	Time (min)	0	15	30	45	60	75	90	105	120	135	150	165	180	195	210	225	240	255	270	285	300	315	330	345	360	375	390	405	420	435	450	465	480	495	510	525	540	555	570	585	600	615	630	645	660	675	690	705
1	T. fusca cutinase	0	0.0540947	0.140873	0.164223	0.179681	0.182677	0.187993	0.188191	0.193437	0.192621	0.197704	0.196864	0.201574	0.200455	0.206027	0.205223	0.210305	0.209373	0.214432	0.213091	0.218186	0.216635	0.221951	0.220098	0.224586	0.22286	0.227442	0.22539	0.22989	0.227733	0.232466	0.230508	0.235043	0.232793	0.237036	0.234984	0.238843	0.237106	0.242025	0.239519	0.243028	0.24072	0.245231	0.243284	0.248041	0.246047	0.250768	0.248693
2	I. sakiensis PETase	0	0.165078	0.192065	0.200155	0.210472	0.219915	0.230582	0.23507	0.242367	0.24513	0.2516	0.253582	0.259038	0.260005	0.26475	0.265438	0.269797	0.270031	0.274134	0.273971	0.27769	0.277491	0.281455	0.280616	0.284043	0.28304	0.286339	0.285465	0.28831	0.286969	0.290081	0.288846	0.291469	0.290186	0.292658	0.291294	0.293194	0.292471	0.295246	0.293532	0.295141	0.293742	0.296155	0.295257	0.298125	0.297228	0.300037	0.299174
3	501	0	0.0260118	0.0686316	0.0982067	0.11307	0.124121	0.134741	0.138658	0.145583	0.150071	0.156996	0.159852	0.16441	0.167091	0.170996	0.173946	0.177524	0.179576	0.183003	0.185043	0.187946	0.189741	0.191816	0.193285	0.195617	0.196654	0.198881	0.19965	0.201003	0.20197	0.203917	0.20464	0.205549	0.206365	0.207776	0.20865	0.209268	0.208487	0.209769	0.208125	0.209874	0.208522	0.211541	0.21097	0.214106	0.213243	0.215714	0.215668
4	702	0	0.0609921	0.147479	0.178057	0.190495	0.19728	0.200474	0.205219	0.209532	0.213915	0.217063	0.221399	0.223171	0.225794	0.227135	0.229326	0.230422	0.232486	0.233616	0.235645	0.236671	0.238757	0.240121	0.242395	0.243222	0.244959	0.245787	0.247699	0.248118	0.249914	0.250683	0.252373	0.253119	0.254716	0.255171	0.256896	0.256722	0.259193	0.260009	0.261315	0.260942	0.262888	0.262993	0.265045	0.265406	0.267143	0.267983	0.269941
5	703	0	0.0592901	0.147596	0.173534	0.184398	0.187336	0.191952	0.195403	0.198283	0.200894	0.203482	0.205452	0.207597	0.208868	0.210978	0.212819	0.214172	0.215862	0.217482	0.21887	0.220478	0.221854	0.223929	0.224675	0.226564	0.227531	0.228953	0.230107	0.23139	0.232404	0.233908	0.235015	0.236344	0.237533	0.238839	0.239946	0.240669	0.242278	0.2437	0.24391	0.244236	0.245262	0.245927	0.246976	0.248153	0.248923	0.250135	0.251184
6	705	0	0.050986	0.0829276	0.0953662	0.101789	0.105438	0.109588	0.11417	0.119847	0.125303	0.13042	0.133276	0.136202	0.138277	0.141017	0.142952	0.145085	0.146822	0.149131	0.150576	0.152535	0.154248	0.156463	0.157617	0.159727	0.160916	0.162677	0.164029	0.165486	0.166594	0.168424	0.169473	0.170953	0.171851	0.17339	0.174334	0.175162	0.176747	0.178542	0.17916	0.179638	0.180851	0.182016	0.183252	0.184931	0.186271	0.187705	0.188988
7	707	0	0.0520741	0.0702948	0.0773825	0.0852164	0.0911034	0.0939945	0.0969904	0.0976433	0.0990655	0.0992054	0.0992637	0.0998465	0.100861	0.101549	0.103285	0.104661	0.105967	0.107552	0.109161	0.110606	0.112192	0.11415	0.115281	0.11682	0.117986	0.11935	0.120748	0.121751	0.12287	0.124199	0.12526	0.126286	0.127218	0.127988	0.12885	0.128955	0.130378	0.13152	0.131916	0.131811	0.132966	0.133502	0.134784	0.135763	0.136952	0.137873	0.139062
8	708	0	0.0534186	0.0806155	0.0938701	0.0997688	0.10407	0.107684	0.111193	0.11462	0.120065	0.123958	0.126954	0.130673	0.134485	0.137318	0.139952	0.142225	0.144324	0.146352	0.148346	0.149966	0.152053	0.154198	0.155632	0.157555	0.158977	0.160528	0.162148	0.163547	0.164864	0.166555	0.167895	0.169096	0.170588	0.171789	0.172966	0.173538	0.175531	0.17707	0.177991	0.17834	0.179879	0.180765	0.182397	0.183854	0.185347	0.18671	0.188366
9	715	0	0.049082	0.149267	0.177944	0.18797	0.191863	0.192831	0.194661	0.196188	0.197505	0.198566	0.200933	0.201947	0.203462	0.205281	0.207018	0.208755	0.21041	0.212205	0.213838	0.21547	0.217078	0.219212	0.220424	0.222114	0.22335	0.224819	0.226276	0.227372	0.228619	0.230251	0.231475	0.232746	0.234005	0.235322	0.236523	0.237292	0.239519	0.241174	0.241967	0.241967	0.243144	0.243727	0.244928	0.246024	0.247248	0.24846	0.249754
10	Geobacillus stearothermophilis esterase	0	0.153292	0.21812	0.25223	0.269273	0.283833	0.297985	0.302718	0.307556	0.313758	0.318036	0.321953	0.324553	0.326931	0.328621	0.330521	0.331722	0.33283	0.333867	0.334835	0.336315	0.337399	0.338448	0.338926	0.339661	0.339999	0.340465	0.341083	0.3412	0.341771	0.34233	0.34261	0.342797	0.34317	0.343216	0.343718	0.343251	0.34437	0.344907	0.345058	0.344557	0.345326	0.345268	0.346247	0.346923	0.347646	0.348148	0.349255
11	Bacillus subilis esterase	0	0.0817852	0.159063	0.19055	0.201892	0.207861	0.21193	0.215275	0.217129	0.219111	0.220206	0.221768	0.222864	0.22368	0.224403	0.225534	0.226455	0.227609	0.22867	0.229556	0.23022	0.231479	0.232517	0.233263	0.234184	0.234988	0.235956	0.236993	0.237471	0.238392	0.239173	0.240024	0.240467	0.241097	0.241621	0.242414	0.242402	0.243871	0.24471	0.2452	0.245037	0.246168	0.246471	0.247776	0.248802	0.249805	0.250761	0.251985
12	Aspergilis oryzae lipase	0	0.00332239	0.0162506	0.0189085	0.023793	0.024574	0.0249937	0.0256349	0.0255882	0.0264742	0.0269755	0.0274651	0.0278031	0.0278148	0.0282578	0.0286891	0.0289922	0.0291787	0.0296567	0.0300297	0.0302279	0.030939	0.03179	0.0317784	0.0325128	0.032676	0.0329674	0.0335503	0.0338417	0.0341099	0.0347161	0.0352873	0.0354038	0.0359284	0.0361499	0.0365929	0.036488	0.0377004	0.0384231	0.0386913	0.0385047	0.0392975	0.0395189	0.040673	0.041559	0.0425033	0.0433076	0.0443685
13	Candita antarctica lipase A	0	0.00853329	0.0220094	0.0253084	0.0259496	0.0264159	0.0264509	0.0269871	0.0271736	0.0275933	0.0279664	0.0281529	0.0277099	0.0276982	0.0273718	0.0275117	0.0272436	0.0273951	0.0273485	0.0272786	0.0273019	0.0274767	0.0278614	0.0277682	0.0279314	0.0278031	0.0278731	0.0282695	0.0280596	0.028048	0.0284327	0.0285959	0.0285842	0.0289223	0.0288873	0.0290855	0.0284676	0.0295984	0.0300414	0.0300764	0.0294818	0.0301347	0.030088	0.0309507	0.0316152	0.0323029	0.0328508	0.0337485
14	Candita antarctica lipase B	0	0.00130564	0.038563	0.0600828	0.0714605	0.080192	0.0878626	0.0947872	0.100896	0.106911	0.111679	0.116307	0.120119	0.123313	0.126286	0.129002	0.131275	0.133222	0.134947	0.136603	0.138048	0.139389	0.140834	0.141697	0.142665	0.143189	0.14404	0.1446	0.144949	0.145462	0.146127	0.146512	0.146698	0.147129	0.147234	0.147549	0.147036	0.148202	0.148726	0.148808	0.148283	0.148971	0.148703	0.149391	0.149997	0.150708	0.151198	0.151979
15	Rhizopus oryzae esterase	0	-0.0918378	-0.104148	-0.107226	-0.109732	-0.1126	-0.11401	-0.115036	-0.115048	-0.115992	-0.117158	-0.117927	-0.118883	-0.119688	-0.120457	-0.121704	-0.122287	-0.123185	-0.123989	-0.124805	-0.12547	-0.126531	-0.126985	-0.127475	-0.128023	-0.128711	-0.12927	-0.129946	-0.130564	-0.131135	-0.131905	-0.132173	-0.132744	-0.133385	-0.13384	-0.134493	-0.134994	-0.136136	-0.135647	-0.135915	-0.136556	-0.13771	-0.137908	-0.138305	-0.138118	-0.138048	-0.138141	-0.138211
16	Aspergilis oryzae phospholipase	0	-0.0174863	0.00378869	0.00847501	0.00275117	-0.0109697	-0.013511	-0.0113661	-0.010585	-0.0107715	-0.0121588	-0.010655	-0.0114127	-0.0113078	-0.0118673	-0.0113311	-0.0117624	-0.0121588	-0.0111096	-0.0109814	-0.00993219	-0.00973402	-0.00889468	-0.00868484	-0.00820688	-0.00816025	-0.00804368	-0.00734423	-0.00705279	-0.00663312	-0.00601527	-0.00544405	-0.00547903	-0.00495444	-0.00459306	-0.0041967	-0.00426665	-0.00285609	-0.00235482	-0.00183023	-0.00222658	-0.00116575	-0.00104918	0.000198178	0.00111912	0.000536245	0.00273951	0.00418504
17	Pseudomonas sp. lipoprotein lipase	0	0.122789	0.194692	0.195869	0.198807	0.201348	0.200031	0.202724	0.203797	0.203692	0.204065	0.206559	0.20783	0.209579	0.211141	0.212913	0.213939	0.215466	0.216841	0.21803	0.219313	0.220583	0.221854	0.222845	0.223777	0.224232	0.225211	0.225887	0.226482	0.227018	0.227858	0.228044	0.228545	0.228814	0.229082	0.22935	0.22872	0.229723	0.230282	0.230306	0.229665	0.230084	0.230049	0.230632	0.231087	0.231635	0.231868	0.232544
18	Bovine pancreas phospholipase	0	-0.00789213	0.0185238	0.0295867	0.0323845	0.0333171	0.0336669	0.0341448	0.0346811	0.0358119	0.0360683	0.0368843	0.0372924	0.037782	0.0380035	0.038563	0.0387379	0.0390993	0.0395073	0.0396705	0.039857	0.0405448	0.0411044	0.0414191	0.0419554	0.0420486	0.0424333	0.0429462	0.0430395	0.0435408	0.0439371	0.0443102	0.04452	0.0452544	0.045406	0.0456974	0.0453943	0.0467116	0.0473878	0.047924	0.047038	0.047959	0.0479939	0.0490431	0.0497775	0.0506402	0.0511764	0.0525404
	lysate	0	0.030496	0.0428064	0.0459073	0.0485885	0.0499757	0.0507684	0.0517593	0.0521673	0.0530766	0.053438	0.0541608	0.0542191	0.0544639	0.0544522	0.054767	0.0549068	0.0550467	0.0551983	0.0553848	0.055548	0.0558744	0.056434	0.056469	0.0567371	0.056877	0.0570402	0.0573899	0.0576464	0.0578445	0.0583108	0.0586606	0.0590686	0.0595232	0.0596981	0.0602576	0.0600944	0.06147	0.0624959	0.0629039	0.0629622	0.0642212	0.0648507	0.0662496	0.0677418	0.0689192	0.0701898	0.0715771
	MasterMix+BHET	0	0.0322855	0.045202	0.0270979	0.0151373	0.00797956	0.00549651	0.0105442	0.011675	0.0118732	0.0127358	0.0136568	0.0138433	0.0139832	0.0140648	0.0145544	0.0145311	0.0148109	0.0148109	0.015452	0.0151956	0.0165012	0.0162331	0.018448	0.0168976	0.0175271	0.0183897	0.0176436	0.0176903	0.0178302	0.0181332	0.0196487	0.0184247	0.0190542	0.0189959	0.020628	0.0185296	0.019742	0.020115	0.0203015	0.019777	0.0203831	0.0202666	0.0211992	0.0219219	0.022703	0.0231809	0.0242185
	MaserMix No BHET	0	0.000600362	0.0389419	0.0403641	0.0401426	0.0400494	0.0405157	0.044386	0.0488857	0.0501098	0.0517185	0.0535254	0.0551342	0.0561017	0.0567312	0.0573491	0.0576405	0.05827	0.0585965	0.0589811	0.0591444	0.0594008	0.0596689	0.0598904	0.0600303	0.0602052	0.0604617	0.0606715	0.0606948	0.0610795	0.0611145	0.061336	0.0613826	0.0615575	0.0616391	0.0618023	0.0619538	0.0620354	0.062152	0.0622103	0.0623502	0.0625717	0.0625017	0.0627815	0.0628281	0.063003	0.0628748	0.0630613
	Average
	Time (min)	0	15	30	45	60	75	90	105	120	135	150	165	180	195	210	225	240	255	270	285	300	315	330	345	360	375	390	405	420	435	450	465	480	495	510	525	540	555	570	585	600	615	630	645	660	675	690	705
1	T. fusca cutinase	0	0.0781791	0.178218	0.205083	0.220675	0.2256	0.232804	0.234804	0.240673	0.241122	0.245837	0.245826	0.250017	0.249492	0.253636	0.253112	0.257093	0.256417	0.260386	0.259564	0.263557	0.262543	0.266844	0.265521	0.269228	0.268115	0.271682	0.270446	0.274066	0.272638	0.276491	0.275273	0.278869	0.277546	0.280915	0.279592	0.282529	0.281801	0.285648	0.284051	0.286709	0.285444	0.288958	0.287863	0.291651	0.290608	0.294379	0.293423
2	I. sakiensis PETase	0	0.19386	0.237384	0.245322	0.261614	0.268742	0.277101	0.281094	0.287243	0.290338	0.295846	0.298248	0.303033	0.304607	0.308436	0.309923	0.313571	0.314504	0.317914	0.318549	0.321662	0.32225	0.325666	0.325573	0.328371	0.328242	0.330731	0.330725	0.332888	0.332427	0.334811	0.334421	0.336443	0.336012	0.337825	0.337259	0.338454	0.338687	0.340658	0.33976	0.340687	0.340226	0.341858	0.341724	0.343869	0.343799	0.345903	0.346014
3	501	0	0.0307943	0.0682877	0.0973645	0.107413	0.121478	0.128161	0.136196	0.138996	0.146874	0.149304	0.155806	0.155856	0.162145	0.161452	0.167994	0.166986	0.172689	0.171477	0.177055	0.175496	0.180794	0.178227	0.183455	0.181252	0.186119	0.183586	0.188223	0.184982	0.190053	0.187506	0.19198	0.188465	0.193367	0.190246	0.195151	0.191228	0.195687	0.192708	0.196118	0.192542	0.196579	0.19404	0.198461	0.196176	0.200612	0.197465	0.202673
4	702	0	0.0870874	0.185022	0.217226	0.230125	0.238903	0.244604	0.249704	0.252904	0.256861	0.259187	0.263022	0.264631	0.267231	0.268216	0.270536	0.27148	0.273607	0.274558	0.276761	0.277699	0.279891	0.281266	0.283557	0.284262	0.286163	0.286751	0.288838	0.289129	0.290995	0.291624	0.293419	0.294008	0.295786	0.296048	0.297884	0.297505	0.300152	0.300734	0.302116	0.301597	0.303538	0.303282	0.305188	0.305234	0.306989	0.307525	0.309717
5	703	0	0.082436	0.182871	0.213012	0.224722	0.229192	0.233092	0.23621	0.238816	0.241287	0.243799	0.246341	0.249406	0.251715	0.253831	0.255876	0.257404	0.259006	0.260703	0.262154	0.263798	0.265313	0.267522	0.268362	0.270209	0.271299	0.272663	0.273916	0.275216	0.276219	0.277647	0.278772	0.279978	0.281132	0.282257	0.283242	0.283767	0.285469	0.286763	0.287054	0.287387	0.288471	0.28917	0.290301	0.291519	0.292481	0.29367	0.295051
6	705	0	0.0819659	0.0997377	0.113826	0.121048	0.127704	0.132565	0.138825	0.143926	0.150349	0.154307	0.158777	0.160945	0.16446	0.165947	0.169158	0.170172	0.172854	0.173722	0.176246	0.176771	0.179248	0.18004	0.181981	0.182285	0.184325	0.184319	0.18647	0.186137	0.188061	0.188003	0.189967	0.189699	0.191447	0.191121	0.193009	0.191943	0.194607	0.19442	0.196017	0.194653	0.196926	0.196209	0.198558	0.19836	0.200715	0.200301	0.202988
7	707	0	0.0790321	0.116866	0.127621	0.134329	0.138946	0.141266	0.144157	0.144914	0.146319	0.14643	0.146342	0.147304	0.148668	0.149513	0.15118	0.152311	0.153465	0.154748	0.155832	0.156823	0.157848	0.15916	0.159463	0.160308	0.160664	0.161188	0.1618	0.162086	0.162471	0.163153	0.163543	0.163957	0.1644	0.16468	0.165117	0.164738	0.165822	0.166533	0.166627	0.166213	0.166924	0.167274	0.168148	0.1689	0.169786	0.170514	0.171698
8	708	0	-0.00123181	0.0370922	0.046972	0.0516291	0.0683926	0.0611417	0.0793624	0.0834425	0.0893528	0.0933572	0.0961783	0.0995357	0.102398	0.104257	0.107492	0.109118	0.112079	0.114597	0.117634	0.119616	0.122344	0.123987	0.126663	0.12812	0.129874	0.132095	0.133337	0.135196	0.136397	0.138973	0.140209	0.142319	0.143415	0.144504	0.146387	0.14757	0.149814	0.151761	0.152752	0.152793	0.155224	0.156185	0.15868	0.159374	0.161262	0.162766	0.165208
9	715	0	0.0362879	0.152851	0.183849	0.193239	0.197768	0.19863	0.200198	0.20165	0.203019	0.203433	0.205905	0.206557	0.208417	0.210923	0.212188	0.214012	0.21674	0.219159	0.220051	0.222219	0.223437	0.226084	0.226719	0.22887	0.230123	0.231621	0.233032	0.234331	0.23601	0.237252	0.238814	0.240154	0.241798	0.239029	0.24009	0.240714	0.243104	0.244403	0.245225	0.245773	0.246968	0.247994	0.249125	0.250588	0.251981	0.253421	0.254511
10	Geobacillus stearothermophilis esterase	0	0.190421	0.257178	0.296761	0.318905	0.335849	0.347145	0.353195	0.358674	0.364281	0.368198	0.371725	0.374254	0.376761	0.378049	0.379506	0.38052	0.381605	0.382753	0.383814	0.38509	0.386139	0.38741	0.387824	0.388617	0.389071	0.389631	0.390342	0.390657	0.391228	0.391851	0.392277	0.392633	0.393303	0.393484	0.39402	0.393699	0.394929	0.395494	0.395698	0.395302	0.396072	0.396188	0.397097	0.397797	0.398607	0.399155	0.400414
11	Bacillus subilis esterase	0	0.141215	0.21756	0.247432	0.257231	0.261812	0.264499	0.26714	0.268637	0.270316	0.271447	0.272747	0.273825	0.2746	0.275061	0.276349	0.277392	0.278995	0.28061	0.281822	0.282656	0.283542	0.284667	0.284993	0.285757	0.286293	0.286975	0.288012	0.287983	0.28884	0.28923	0.290105	0.29028	0.290816	0.290915	0.29162	0.291201	0.292623	0.292873	0.293246	0.29278	0.29359	0.293777	0.294651	0.295438	0.296213	0.296936	0.298131
12	Aspergilis oryzae lipase	0	0.0277041	0.0559968	0.0599954	0.0625833	0.0631254	0.0634809	0.0642212	0.0647982	0.0656434	0.0662904	0.0671997	0.0676135	0.068243	0.0684878	0.0691756	0.0697993	0.0701665	0.0708485	0.0714605	0.0720317	0.0728128	0.0743865	0.0748062	0.0762517	0.0774874	0.0786765	0.0800754	0.0811129	0.0821738	0.0832754	0.0842546	0.084989	0.0860091	0.0866211	0.087542	0.0877577	0.0894131	0.0903923	0.0909577	0.0911325	0.0936273	0.094146	0.0953759	0.0964659	0.0976141	0.0986283	0.100056
13	Candita antarctica lipase A	0	0.0473819	0.0720142	0.0777322	0.0790379	0.0798189	0.080192	0.0812586	0.0818823	0.0829198	0.0835202	0.0842604	0.0839574	0.0842546	0.0837767	0.0841147	0.0840331	0.0838291	0.0842838	0.0842838	0.0842779	0.0844528	0.0850998	0.0848258	0.0851056	0.0851464	0.0852338	0.0856011	0.0855253	0.0855369	0.0858109	0.0860091	0.0860674	0.0863879	0.0864462	0.0866502	0.0860557	0.0872506	0.0877052	0.0877694	0.0872564	0.0879384	0.0879326	0.0888593	0.089518	0.0903224	0.0909402	0.0921526
14	Candita antarctica lipase B	0	0.0569294	0.126822	0.155587	0.168941	0.176227	0.181158	0.185075	0.188339	0.191702	0.194045	0.196499	0.198533	0.200031	0.201442	0.2028	0.203936	0.204869	0.205755	0.206629	0.207498	0.208256	0.209445	0.209777	0.210377	0.210657	0.21117	0.211578	0.21177	0.212085	0.212604	0.212919	0.213088	0.213449	0.213525	0.21381	0.213222	0.214463	0.214877	0.214947	0.214422	0.215104	0.215052	0.215705	0.216305	0.217074	0.217558	0.218596
15	Rhizopus oryzae esterase	0	0.0330723	0.0138375	0.0129049	0.0108123	0.00860324	0.00792127	0.00711691	0.00864987	0.00785716	0.00732674	0.0068313	0.00643494	0.0061027	0.00567138	0.00483786	0.00463969	0.00388195	0.00350891	0.00288523	0.00252385	0.00180691	0.00178943	0.00153296	0.001055	0.000705279	0.000134061	-0.000338068	-0.000681964	-0.00124735	-0.00171948	-0.00199926	-0.00218578	-0.00278614	-0.00300764	-0.003608	-0.00400435	-0.00510016	-0.00448231	-0.00482038	-0.00523422	-0.0064058	-0.00634751	-0.00678467	-0.00658649	-0.00651655	-0.00637666	-0.00656318
16	Aspergilis oryzae phospholipase	0	0.0151548	0.0264567	0.0327692	0.0266024	0.02124	0.0246265	0.0308866	0.0313179	0.0312538	0.0312013	0.032402	0.0321281	0.0324778	0.0322388	0.032845	0.0326177	0.032915	0.0335911	0.0340224	0.0348093	0.035363	0.0364122	0.036727	0.0371758	0.0376129	0.037747	0.0387962	0.039041	0.0395539	0.0403816	0.0408829	0.0412443	0.0419728	0.0423925	0.0429812	0.0429521	0.0445783	0.0451553	0.0458373	0.0454818	0.0465776	0.0470205	0.0482388	0.0494045	0.0495386	0.0513163	0.0529192
17	Pseudomonas sp. lipoprotein lipase	0	0.136743	0.235534	0.236344	0.239492	0.241905	0.239853	0.240471	0.240937	0.241491	0.242173	0.244505	0.24595	0.247739	0.249144	0.250951	0.252105	0.253522	0.25502	0.256203	0.257351	0.258528	0.260009	0.260831	0.261781	0.262405	0.263314	0.264083	0.264713	0.265202	0.266059	0.266316	0.266893	0.267248	0.267546	0.267831	0.267307	0.268344	0.26884	0.268869	0.268274	0.268665	0.268793	0.269294	0.269813	0.270378	0.270699	0.271585
18	Bovine pancreas phospholipase	0	0.0229886	0.0595699	0.0716703	0.0738153	0.0749519	0.0752667	0.0760652	0.0766831	0.0783909	0.0802328	0.0828207	0.0845927	0.0857176	0.0866736	0.0879384	0.0887194	0.0894014	0.0900717	0.0905089	0.090946	0.0917562	0.0926189	0.0929278	0.0935107	0.0937613	0.0941402	0.0947347	0.0949329	0.0953409	0.0958946	0.0962735	0.0966057	0.0972411	0.0975675	0.0979056	0.0976199	0.0990247	0.0997066	0.100173	0.0993278	0.10029	0.100435	0.101444	0.10219	0.103151	0.103711	0.105215
	lysate	0	0.052383	0.0749344	0.0813752	0.0846685	0.0864171	0.0876295	0.0890692	0.0900134	0.0915639	0.0936331	0.0950611	0.095918	0.0966349	0.0971362	0.0979638	0.098675	0.0992229	0.0998582	0.100494	0.101071	0.101805	0.102907	0.103221	0.103851	0.104387	0.104848	0.105565	0.106241	0.106678	0.107459	0.108094	0.108869	0.109592	0.109983	0.110705	0.110717	0.112291	0.113317	0.113783	0.113847	0.114984	0.115642	0.116855	0.118166	0.119274	0.120474	0.121943
	MasterMix+BHET	0	0.0497717	0.0728419	0.0619538	0.0556588	0.0530766	0.0577455	0.0616099	0.0619422	0.0633003	0.0637432	0.0648507	0.0651072	0.0652704	0.0651946	0.0656784	0.0655443	0.0658649	0.0658707	0.0665527	0.0663254	0.0676718	0.0675669	0.0697352	0.0680973	0.06889	0.0697235	0.069199	0.0692689	0.069607	0.0701199	0.0719793	0.0709884	0.071921	0.07209	0.0740018	0.0719326	0.0734073	0.0739028	0.0742758	0.0737978	0.0745381	0.0745089	0.0754765	0.0762459	0.0772018	0.0777672	0.0789971
	MaserMix No BHET	0	-0.00352465	0.0471622	0.0503971	0.0511316	0.0543316	0.0602652	0.0633603	0.0664903	0.0683614	0.0695737	0.0709552	0.0719286	0.0726746	0.0731235	0.073648	0.0738579	0.074295	0.0747438	0.0753967	0.0760087	0.0766906	0.0774484	0.0777457	0.0781653	0.0786025	0.0788764	0.0792903	0.0794535	0.0797799	0.0799081	0.080217	0.0803569	0.0805901	0.0807941	0.0810331	0.0811496	0.081342	0.0814761	0.0815693	0.0817267	0.081919	0.0819424	0.082158	0.0822454	0.0824961	0.0824436	0.0827409
[truncated: 49 more columns]

## Sheet: mM Ester Cleaved
Trial 1
Enzyme Number	Enzyme Name
	Time (min)	0	14.9998	29.9998	44.9998	59.9998	74.9998	89.9998	105	120	135	150	165	180	195	210	225	240	255	270	285	300	315	330	345	360	375	390	405	420	435	450	465	480	495	510	525	540	555	570	585	600	615	630	645	660	675	690	705
	Hours	0	0.249997	0.499997	0.749997	0.999997	1.25	1.5	1.75	2	2.25	2.5	2.75	3	3.25	3.5	3.75	4	4.25	4.5	4.75	5	5.25	5.5	5.75	6	6.25	6.5	6.75	7	7.25	7.5	7.75	8	8.25	8.5	8.75	9	9.25	9.5	9.75	10	10.25	10.5	10.75	11	11.25	11.5	11.75
1	T. fusca cutinase	0	0.511318	1.07781	1.22971	1.30834	1.34261	1.38808	1.40708	1.43955	1.44811	1.46986	1.47394	1.4923	1.49265	1.50623	1.505	1.5194	1.5173	1.5317	1.53018	1.54464	1.54225	1.55869	1.55472	1.56935	1.56685	1.57961	1.57751	1.59121	1.58771	1.60258	1.60019	1.61348	1.61149	1.62397	1.621	1.63108	1.63248	1.64635	1.64291	1.65195	1.65084	1.66343	1.6622	1.67631	1.67584	1.68995	1.69077
2	I. sakiensis PETase	0	1.11321	1.41351	1.45245	1.56378	1.58785	1.6181	1.63559	1.66059	1.67773	1.70046	1.71457	1.73514	1.74604	1.76061	1.77204	1.78673	1.79489	1.80847	1.81564	1.82817	1.83505	1.84939	1.85265	1.86349	1.86722	1.87561	1.87993	1.88733	1.88943	1.89771	1.89998	1.90709	1.90919	1.91496	1.91612	1.91857	1.92452	1.93035	1.92994	1.93116	1.93355	1.93781	1.94096	1.94807	1.95185	1.95885	1.96427
3	501	0	0.177884	0.339719	0.482611	0.508782	0.594173	0.6079	0.668665	0.662049	0.718384	0.708067	0.758806	0.736511	0.785998	0.759535	0.810216	0.782238	0.829014	0.799753	0.845334	0.815229	0.859236	0.823185	0.868125	0.834435	0.877917	0.841458	0.883979	0.84481	0.890682	0.855476	0.896598	0.856904	0.901844	0.863578	0.908256	0.865939	0.914434	0.878238	0.920554	0.876052	0.923177	0.882697	0.929764	0.891236	0.939906	0.896074	0.948387
4	702	0	0.565914	1.11283	1.28198	1.34877	1.40263	1.44367	1.47094	1.48138	1.49904	1.50656	1.52323	1.53046	1.54334	1.54648	1.55873	1.56269	1.57365	1.57749	1.58938	1.59364	1.60512	1.61206	1.6236	1.62651	1.63683	1.63858	1.64989	1.6507	1.66038	1.66283	1.67233	1.67448	1.68428	1.68463	1.69436	1.69145	1.70555	1.7073	1.71459	1.71126	1.72094	1.71785	1.72665	1.72531	1.73417	1.73534	1.74746
5	703	0	0.52791	1.09073	1.26245	1.32523	1.35524	1.37116	1.38509	1.39674	1.4084	1.42058	1.43615	1.45608	1.47281	1.48342	1.49467	1.50318	1.51075	1.51961	1.52719	1.53558	1.54386	1.55558	1.56024	1.56928	1.57534	1.58187	1.58863	1.59521	1.60017	1.60693	1.61264	1.61806	1.62366	1.62838	1.63269	1.63432	1.6433	1.64913	1.65099	1.65268	1.6584	1.66207	1.66813	1.67443	1.6802	1.68602	1.69459
6	705	0	0.564728	0.582739	0.661427	0.701529	0.74985	0.777711	0.817405	0.84002	0.876975	0.890964	0.92139	0.928443	0.953215	0.954381	0.976821	0.976297	0.994424	0.991568	1.00958	1.00503	1.02124	1.01809	1.03173	1.02421	1.03866	1.0298	1.04455	1.03394	1.04764	1.03791	1.0523	1.04222	1.05522	1.04426	1.05842	1.04362	1.06233	1.05149	1.06437	1.04834	1.06501	1.05201	1.06932	1.05895	1.07579	1.06449	1.08494
7	707	0	0.52995	0.817191	0.889293	0.917213	0.933941	0.942684	0.956615	0.960928	0.967864	0.968272	0.967107	0.97381	0.982378	0.987391	0.995376	0.999806	1.00482	1.00971	1.01251	1.01519	1.01753	1.02085	1.01822	1.01898	1.01671	1.01514	1.01426	1.0121	1.01036	1.01053	1.00913	1.00814	1.00791	1.00686	1.00692	1.0026	1.00633	1.00773	1.00668	1.00307	1.00441	1.00523	1.00756	1.01018	1.0131	1.01578	1.02166
8	708	0	-0.279411	-0.0321553	0.000369154	0.0174474	0.163574	0.0729954	0.237658	0.261322	0.293206	0.313781	0.327012	0.341992	0.351551	0.355981	0.375158	0.380054	0.399172	0.414211	0.434611	0.446327	0.463172	0.468884	0.488469	0.493423	0.503857	0.518312	0.522625	0.534225	0.539645	0.556957	0.562611	0.577707	0.581204	0.586101	0.59904	0.608017	0.62049	0.632264	0.637568	0.636228	0.65284	0.658027	0.674814	0.674464	0.685889	0.694107	0.710253
9	715	0	0.117469	0.78218	0.948765	0.992539	1.01836	1.02215	1.02868	1.03556	1.04267	1.0415	1.05438	1.05584	1.06686	1.08283	1.08679	1.09635	1.11535	1.13056	1.13132	1.14484	1.14898	1.16478	1.16507	1.17813	1.18448	1.19212	1.19894	1.20645	1.217	1.22126	1.23076	1.23781	1.24796	1.21368	1.21829	1.22068	1.23344	1.23816	1.24242	1.2479	1.25396	1.2613	1.26661	1.27576	1.28357	1.2919	1.29633
10	Geobacillus stearothermophilis esterase	0	1.13775	1.48118	1.70646	1.84268	1.93932	1.98152	2.01836	2.04896	2.07403	2.0918	2.10748	2.11978	2.13295	2.13738	2.14246	2.14659	2.1519	2.15819	2.16396	2.16933	2.1744	2.18186	2.18361	2.18786	2.19072	2.19398	2.198	2.20057	2.20342	2.20686	2.20972	2.21234	2.21718	2.21875	2.22161	2.22074	2.22744	2.23041	2.23169	2.23024	2.23408	2.23554	2.23974	2.24335	2.24784	2.25081	2.25786
11	Bacillus subilis esterase	0	1.00323	1.38029	1.52158	1.56284	1.57881	1.58534	1.59502	1.60073	1.60761	1.61344	1.61863	1.62393	1.6276	1.62859	1.63582	1.64165	1.65191	1.66275	1.67044	1.67546	1.67802	1.68408	1.68362	1.68665	1.68799	1.68997	1.69516	1.69248	1.69644	1.69644	1.70093	1.70046	1.70268	1.70104	1.70413	1.69999	1.70687	1.70518	1.70646	1.70262	1.70507	1.70542	1.70763	1.71037	1.71311	1.71556	1.72139
12	Aspergilis oryzae lipase	0	0.260429	0.478715	0.505411	0.506868	0.508384	0.509841	0.514038	0.520041	0.524063	0.528027	0.534671	0.53712	0.543356	0.543589	0.548311	0.553032	0.555772	0.560201	0.564456	0.569178	0.573433	0.584915	0.58917	0.599954	0.611494	0.621928	0.633003	0.641921	0.651188	0.659174	0.66611	0.672871	0.680449	0.685461	0.692456	0.695137	0.705629	0.711807	0.716121	0.718802	0.739785	0.743865	0.750394	0.756864	0.763625	0.769745	0.778721
13	Candita antarctica lipase A	0	0.431153	0.610096	0.65078	0.660631	0.66611	0.669665	0.677651	0.682955	0.691232	0.69537	0.70184	0.701024	0.704055	0.700908	0.703589	0.704113	0.701316	0.706095	0.706445	0.70627	0.707144	0.711691	0.709417	0.711399	0.712448	0.712973	0.714663	0.714955	0.71513	0.715946	0.717111	0.717753	0.719268	0.720026	0.721075	0.718219	0.724514	0.726845	0.727312	0.725155	0.728711	0.728886	0.73384	0.737104	0.741709	0.745148	0.752783
14	Candita antarctica lipase B	0	0.562766	1.0754	1.25546	1.3321	1.36131	1.37226	1.37681	1.37891	1.38246	1.38206	1.38345	1.38474	1.38375	1.38299	1.38299	1.38299	1.38258	1.38281	1.38328	1.38474	1.38561	1.39027	1.38928	1.39045	1.39062	1.3915	1.39278	1.39296	1.39354	1.3954	1.39663	1.39739	1.39884	1.39908	1.40036	1.39704	1.40362	1.40514	1.40543	1.40281	1.40619	1.407	1.41009	1.41306	1.4172	1.41959	1.42606
15	Rhizopus oryzae esterase	0	0.789913	0.659115	0.665177	0.656784	0.649032	0.649265	0.64635	0.661738	0.658532	0.659057	0.65795	0.658766	0.659465	0.658999	0.6569	0.657833	0.654744	0.655035	0.652879	0.652587	0.650722	0.65282	0.652704	0.650664	0.650605	0.647691	0.64635	0.646001	0.643203	0.642329	0.640871	0.641862	0.639064	0.639123	0.636383	0.634926	0.62968	0.633411	0.63137	0.630438	0.624493	0.626066	0.623677	0.624726	0.625075	0.626941	0.625425
16	Aspergilis oryzae phospholipase	0	0.238979	0.245624	0.285317	0.252268	0.267248	0.31382	0.365696	0.366104	0.366395	0.372807	0.377295	0.378344	0.381317	0.381725	0.385106	0.384989	0.389944	0.391459	0.395131	0.397754	0.402301	0.408596	0.410694	0.412792	0.416931	0.417688	0.424683	0.425674	0.428705	0.433892	0.436049	0.439838	0.444501	0.44689	0.450796	0.450854	0.460063	0.463328	0.467524	0.46595	0.471604	0.475451	0.481397	0.488449	0.492704	0.499466	0.508267
17	Pseudomonas sp. lipoprotein lipase	0	0.753483	1.38188	1.3841	1.40088	1.41231	1.39838	1.39109	1.39039	1.39645	1.40141	1.41225	1.42035	1.4295	1.43574	1.44495	1.45136	1.45789	1.46599	1.47188	1.47695	1.48237	1.49082	1.49408	1.49892	1.50289	1.50708	1.5114	1.51472	1.51693	1.5213	1.52294	1.5262	1.52842	1.53005	1.53156	1.52946	1.53483	1.53698	1.53716	1.53442	1.53623	1.53768	1.53978	1.5427	1.54561	1.54765	1.55313
18	Bovine pancreas phospholipase	0	0.269347	0.50308	0.56877	0.57623	0.582934	0.584332	0.589928	0.593425	0.60485	0.621986	0.643786	0.659465	0.668266	0.676718	0.686569	0.693505	0.698518	0.703181	0.706736	0.710175	0.714838	0.720667	0.722182	0.72533	0.72737	0.729235	0.732616	0.734131	0.735705	0.739261	0.741184	0.743457	0.746139	0.748645	0.750568	0.749228	0.756689	0.760128	0.762109	0.758088	0.7631	0.764383	0.76922	0.773009	0.778313	0.781228	0.789446
	lysate	0	0.37135	0.535313	0.584216	0.603742	0.614292	0.622452	0.631895	0.639298	0.650256	0.669141	0.679807	0.688084	0.69403	0.699101	0.705804	0.712215	0.716995	0.72259	0.728011	0.732966	0.738678	0.746896	0.749869	0.754823	0.759486	0.763275	0.768696	0.774175	0.777556	0.783035	0.787639	0.793352	0.798306	0.801337	0.805767	0.806699	0.815559	0.820688	0.823311	0.823661	0.828732	0.832171	0.8373	0.842954	0.848142	0.853796	0.861548
	MasterMix+BHET	0	0.33629	0.502409	0.484049	0.480901	0.490868	0.549972	0.563378	0.561047	0.573637	0.573753	0.580223	0.581855	0.582788	0.581622	0.584012	0.582788	0.584595	0.584653	0.588267	0.587276	0.594212	0.594504	0.605112	0.596485	0.601265	0.605287	0.603771	0.604238	0.606919	0.610533	0.621549	0.61776	0.623939	0.625921	0.636879	0.626678	0.635363	0.638452	0.64125	0.639094	0.643465	0.643757	0.648769	0.652849	0.658503	0.661767	0.668879
	MaserMix No BHET	0	-0.0382483	0.276912	0.302151	0.310603	0.343069	0.400074	0.411673	0.420475	0.433065	0.437145	0.441924	0.443615	0.446238	0.447578	0.449735	0.450376	0.4516	0.454456	0.459061	0.464365	0.469902	0.476139	0.478004	0.481502	0.484999	0.486456	0.489545	0.491061	0.492401	0.493509	0.495491	0.496656	0.498114	0.499746	0.501319	0.501727	0.503243	0.504001	0.504642	0.505516	0.506332	0.506915	0.507673	0.508314	0.509946	0.510062	0.512103
Trial 2
Enzyme Number	Enzyme Name
	Time (min)	0	14.9998	29.9998	44.9998	59.9998	74.9998	89.9998	105	120	135	150	165	180	195	210	225	240	255	270	285	300	315	330	345	360	375	390	405	420	435	450	465	480	495	510	525	540	555	570	585	600	615	630	645	660	675	690	705
1	T. fusca cutinase	0	0.270474	0.704366	0.821116	0.898405	0.913385	0.939964	0.940955	0.967184	0.963104	0.988518	0.984321	1.00787	1.00227	1.03013	1.02611	1.05153	1.04686	1.07216	1.06546	1.09093	1.08318	1.10976	1.10049	1.12293	1.1143	1.13721	1.12695	1.14945	1.13867	1.16233	1.15254	1.17521	1.16396	1.18518	1.17492	1.19421	1.18553	1.21013	1.19759	1.21514	1.2036	1.22616	1.21642	1.2402	1.23024	1.25384	1.24347
2	I. sakiensis PETase	0	0.82539	0.960326	1.00078	1.05236	1.09957	1.15291	1.17535	1.21184	1.22565	1.258	1.26791	1.29519	1.30003	1.32375	1.32719	1.34899	1.35015	1.37067	1.36985	1.38845	1.38746	1.40727	1.40308	1.42021	1.4152	1.4317	1.42733	1.44155	1.43484	1.45041	1.44423	1.45734	1.45093	1.46329	1.45647	1.46597	1.46236	1.47623	1.46766	1.4757	1.46871	1.48078	1.47629	1.49063	1.48614	1.50018	1.49587
3	501	0	0.130059	0.343158	0.491034	0.56535	0.620607	0.673707	0.693291	0.727914	0.750355	0.784978	0.799258	0.822048	0.835455	0.854981	0.869728	0.887622	0.89788	0.915017	0.925217	0.939731	0.948707	0.959082	0.966427	0.978084	0.983272	0.994405	0.998252	1.00501	1.00985	1.01958	1.0232	1.02775	1.03183	1.03888	1.04325	1.04634	1.04243	1.04885	1.04063	1.04937	1.04261	1.0577	1.05485	1.07053	1.06621	1.07857	1.07834
4	702	0	0.30496	0.737395	0.890284	0.952476	0.9864	1.00237	1.02609	1.04766	1.06958	1.08531	1.107	1.11586	1.12897	1.13567	1.14663	1.15211	1.16243	1.16808	1.17822	1.18335	1.19379	1.20061	1.21197	1.21611	1.2248	1.22893	1.23849	1.24059	1.24957	1.25341	1.26187	1.2656	1.27358	1.27586	1.28448	1.28361	1.29596	1.30004	1.30657	1.30471	1.31444	1.31497	1.32523	1.32703	1.33572	1.33991	1.34971
5	703	0	0.29645	0.737978	0.867668	0.921992	0.936681	0.959762	0.977016	0.991413	1.00447	1.01741	1.02726	1.03798	1.04434	1.05489	1.0641	1.07086	1.07931	1.08741	1.09435	1.10239	1.10927	1.11965	1.12338	1.13282	1.13766	1.14477	1.15054	1.15695	1.16202	1.16954	1.17508	1.18172	1.18767	1.19419	1.19973	1.20335	1.21139	1.2185	1.21955	1.22118	1.22631	1.22963	1.23488	1.24077	1.24461	1.25068	1.25592
6	705	0	0.25493	0.414638	0.476831	0.508947	0.527191	0.547942	0.570849	0.599235	0.626513	0.652101	0.666382	0.681012	0.691387	0.705085	0.714761	0.725427	0.734112	0.745653	0.752881	0.762673	0.771241	0.782316	0.788086	0.798636	0.804582	0.813383	0.820144	0.82743	0.832968	0.842119	0.847365	0.854767	0.859255	0.866949	0.871671	0.875809	0.883736	0.892712	0.895802	0.898191	0.904253	0.910082	0.91626	0.924654	0.931357	0.938526	0.944938
7	707	0	0.26037	0.351474	0.386913	0.426082	0.455517	0.469972	0.484952	0.488216	0.495327	0.496027	0.496318	0.499233	0.504304	0.507743	0.516427	0.523305	0.529834	0.537761	0.545804	0.553032	0.560959	0.570751	0.576405	0.584099	0.589928	0.596748	0.603742	0.608755	0.614351	0.620995	0.626299	0.631429	0.636092	0.639939	0.644252	0.644777	0.651888	0.6576	0.659582	0.659057	0.664828	0.667509	0.67392	0.678817	0.684762	0.689367	0.695312
8	708	0	0.267093	0.403078	0.469351	0.498844	0.520352	0.538421	0.555966	0.573102	0.600323	0.619791	0.634771	0.653364	0.672424	0.686588	0.699761	0.711127	0.721619	0.731761	0.741728	0.74983	0.760264	0.770989	0.778158	0.787775	0.794886	0.802639	0.810741	0.817735	0.824322	0.832773	0.839476	0.84548	0.852941	0.858944	0.864831	0.867688	0.877655	0.885349	0.889953	0.891702	0.899396	0.903826	0.911986	0.919272	0.926733	0.933552	0.941829
9	715	0	0.24541	0.746333	0.88972	0.939848	0.959316	0.964153	0.973305	0.98094	0.987527	0.992831	1.00466	1.00973	1.01731	1.0264	1.03509	1.04377	1.05205	1.06103	1.06919	1.07735	1.08539	1.09606	1.10212	1.11057	1.11675	1.12409	1.13138	1.13686	1.1431	1.15126	1.15738	1.16373	1.17002	1.17661	1.18262	1.18646	1.19759	1.20587	1.20984	1.20984	1.21572	1.21864	1.22464	1.23012	1.23624	1.2423	1.24877
10	Geobacillus stearothermophilis esterase	0	0.766462	1.0906	1.26115	1.34636	1.41917	1.48993	1.51359	1.53778	1.56879	1.59018	1.60977	1.62276	1.63465	1.64311	1.65261	1.65861	1.66415	1.66934	1.67417	1.68158	1.687	1.69224	1.69463	1.6983	1.69999	1.70233	1.70542	1.706	1.70885	1.71165	1.71305	1.71398	1.71585	1.71608	1.71859	1.71626	1.72185	1.72453	1.72529	1.72278	1.72663	1.72634	1.73124	1.73462	1.73823	1.74074	1.74627
11	Bacillus subilis esterase	0	0.408926	0.795314	0.952748	1.00946	1.03931	1.05965	1.07638	1.08564	1.09555	1.10103	1.10884	1.11432	1.1184	1.12202	1.12767	1.13227	1.13804	1.14335	1.14778	1.1511	1.1574	1.16258	1.16631	1.17092	1.17494	1.17978	1.18497	1.18736	1.19196	1.19587	1.20012	1.20234	1.20548	1.20811	1.21207	1.21201	1.21936	1.22355	1.226	1.22518	1.23084	1.23235	1.23888	1.24401	1.24902	1.2538	1.25992
12	Aspergilis oryzae lipase	0	0.0166119	0.0812528	0.0945424	0.118965	0.12287	0.124968	0.128174	0.127941	0.132371	0.134877	0.137325	0.139016	0.139074	0.141289	0.143446	0.144961	0.145894	0.148283	0.150149	0.15114	0.154695	0.15895	0.158892	0.162564	0.16338	0.164837	0.167752	0.169209	0.170549	0.17358	0.176436	0.177019	0.179642	0.18075	0.182965	0.18244	0.188502	0.192116	0.193456	0.192524	0.196487	0.197595	0.203365	0.207795	0.212516	0.216538	0.221842
13	Candita antarctica lipase A	0	0.0426665	0.110047	0.126542	0.129748	0.13208	0.132254	0.134936	0.135868	0.137967	0.139832	0.140764	0.138549	0.138491	0.136859	0.137559	0.136218	0.136976	0.136743	0.136393	0.136509	0.137384	0.139307	0.138841	0.139657	0.139016	0.139365	0.141347	0.140298	0.14024	0.142163	0.142979	0.142921	0.144611	0.144436	0.145427	0.142338	0.147992	0.150207	0.150382	0.147409	0.150673	0.15044	0.154753	0.158076	0.161515	0.164254	0.168742
14	Candita antarctica lipase B	0	0.0065282	0.192815	0.300414	0.357303	0.40096	0.439313	0.473936	0.504479	0.534555	0.558395	0.581535	0.600595	0.616565	0.631429	0.64501	0.656376	0.66611	0.674736	0.683013	0.690241	0.696944	0.704172	0.708485	0.713323	0.715946	0.720201	0.722998	0.724747	0.727312	0.730634	0.732558	0.73349	0.735647	0.736171	0.737745	0.735181	0.741009	0.743632	0.74404	0.741417	0.744856	0.743516	0.746955	0.749986	0.753541	0.755989	0.759894
15	Rhizopus oryzae esterase	0	-0.459189	-0.520741	-0.536129	-0.54866	-0.562999	-0.570052	-0.575181	-0.57524	-0.579961	-0.58579	-0.589637	-0.594416	-0.598438	-0.602285	-0.608522	-0.611436	-0.615924	-0.619946	-0.624026	-0.627349	-0.632653	-0.634926	-0.637374	-0.640114	-0.643553	-0.64635	-0.649731	-0.65282	-0.655676	-0.659523	-0.660864	-0.66372	-0.666926	-0.669199	-0.672463	-0.67497	-0.680682	-0.678234	-0.679574	-0.68278	-0.688551	-0.689541	-0.691523	-0.690591	-0.690241	-0.690707	-0.691057
16	Aspergilis oryzae phospholipase	0	-0.0874313	0.0189434	0.042375	0.0137559	-0.0548486	-0.0675552	-0.0568303	-0.0529251	-0.0538577	-0.0607939	-0.0532748	-0.0570635	-0.0565389	-0.0593367	-0.0566555	-0.0588121	-0.0607939	-0.055548	-0.0549068	-0.049661	-0.0486701	-0.0444734	-0.0434242	-0.0410344	-0.0408013	-0.0402184	-0.0367211	-0.035264	-0.0331656	-0.0300764	-0.0272203	-0.0273951	-0.0247722	-0.0229653	-0.0209835	-0.0213332	-0.0142804	-0.0117741	-0.00915114	-0.0111329	-0.00582875	-0.00524588	0.000990888	0.0055956	0.00268123	0.0136976	0.0209252
17	Pseudomonas sp. lipoprotein lipase	0	0.613943	0.97346	0.979347	0.994035	1.00674	1.00016	1.01362	1.01898	1.01846	1.02032	1.0328	1.03915	1.04789	1.0557	1.06456	1.06969	1.07733	1.08421	1.09015	1.09656	1.10292	1.10927	1.11422	1.11889	1.12116	1.12606	1.12944	1.13241	1.13509	1.13929	1.14022	1.14273	1.14407	1.14541	1.14675	1.1436	1.14861	1.15141	1.15153	1.14832	1.15042	1.15025	1.15316	1.15543	1.15817	1.15934	1.16272
18	Bovine pancreas phospholipase	0	-0.0394607	0.0926189	0.147934	0.161923	0.166586	0.168334	0.170724	0.173405	0.179059	0.180342	0.184422	0.186462	0.18891	0.190017	0.192815	0.193689	0.195496	0.197536	0.198352	0.199285	0.202724	0.205522	0.207096	0.209777	0.210243	0.212167	0.214731	0.215198	0.217704	0.219686	0.221551	0.2226	0.226272	0.22703	0.228487	0.226972	0.233558	0.236939	0.23962	0.23519	0.239795	0.23997	0.245216	0.248888	0.253201	0.255882	0.262702
	lysate	0	0.15248	0.214032	0.229536	0.242942	0.249879	0.253842	0.258797	0.260837	0.265383	0.26719	0.270804	0.271095	0.272319	0.272261	0.273835	0.274534	0.275234	0.275991	0.276924	0.27774	0.279372	0.28217	0.282345	0.283685	0.284385	0.285201	0.286949	0.288232	0.289223	0.291554	0.293303	0.295343	0.297616	0.29849	0.301288	0.300472	0.30735	0.312479	0.314519	0.314811	0.321106	0.324254	0.331248	0.338709	0.344596	0.350949	0.357885
	MasterMix+BHET	0	0.161427	0.22601	0.135489	0.0756864	0.0398978	0.0274826	0.0527211	0.058375	0.0593658	0.0636791	0.0682838	0.0692164	0.0699159	0.0703239	0.072772	0.0726554	0.0740543	0.0740543	0.0772601	0.0759778	0.082506	0.0811654	0.09224	0.0844878	0.0876353	0.0919486	0.0882182	0.0884513	0.0891508	0.0906662	0.0982436	0.0921234	0.095271	0.0949795	0.10314	0.092648	0.0987099	0.100575	0.101508	0.0988848	0.101916	0.101333	0.105996	0.10961	0.113515	0.115905	0.121092
	MaserMix No BHET	0	0.00300181	0.194709	0.201821	0.200713	0.200247	0.202578	0.22193	0.244429	0.250549	0.258593	0.267627	0.275671	0.280509	0.283656	0.286745	0.288203	0.29135	0.292982	0.294906	0.295722	0.297004	0.298345	0.299452	0.300152	0.301026	0.302308	0.303357	0.303474	0.305397	0.305572	0.30668	0.306913	0.307787	0.308195	0.309011	0.309769	0.310177	0.31076	0.311051	0.311751	0.312858	0.312509	0.313907	0.314141	0.315015	0.314374	0.315306
	Average
Enzyme Number	Enzyme Name
	Time (min)	0	14.9998	29.9998	44.9998	59.9998	74.9998	89.9998	105	120	135	150	165	180	195	210	225	240	255	270	285	300	315	330	345	360	375	390	405	420	435	450	465	480	495	510	525	540	555	570	585	600	615	630	645	660	675	690	705
1	T. fusca cutinase	0	0.390896	0.89109	1.02541	1.10337	1.128	1.16402	1.17402	1.20337	1.20561	1.22919	1.22913	1.25008	1.24746	1.26818	1.26556	1.28546	1.28208	1.30193	1.29782	1.31778	1.31271	1.33422	1.32761	1.34614	1.34057	1.35841	1.35223	1.37033	1.36319	1.38245	1.37636	1.39434	1.38773	1.40457	1.39796	1.41265	1.409	1.42824	1.42025	1.43354	1.42722	1.44479	1.43931	1.45826	1.45304	1.4719	1.46712
2	I. sakiensis PETase	0	0.969302	1.18692	1.22661	1.30807	1.34371	1.3855	1.40547	1.43621	1.45169	1.47923	1.49124	1.51516	1.52303	1.54218	1.54961	1.56786	1.57252	1.58957	1.59275	1.60831	1.61125	1.62833	1.62786	1.64185	1.64121	1.65366	1.65363	1.66444	1.66214	1.67406	1.6721	1.68222	1.68006	1.68912	1.6863	1.69227	1.69344	1.70329	1.6988	1.70343	1.70113	1.70929	1.70862	1.71935	1.719	1.72952	1.73007
3	501	0	0.153971	0.341439	0.486822	0.537066	0.60739	0.640803	0.680978	0.694982	0.734369	0.746522	0.779032	0.77928	0.810726	0.807258	0.839972	0.83493	0.863447	0.857385	0.885276	0.87748	0.903972	0.891134	0.917276	0.906259	0.930594	0.917931	0.941115	0.924911	0.950266	0.937531	0.959898	0.942325	0.966835	0.951228	0.975753	0.956139	0.978434	0.963541	0.98059	0.962711	0.982893	0.970201	0.992306	0.980882	1.00306	0.987323	1.01336
4	702	0	0.435437	0.92511	1.08613	1.15062	1.19452	1.22302	1.24852	1.26452	1.28431	1.29594	1.31511	1.32316	1.33615	1.34108	1.35268	1.3574	1.36804	1.37279	1.3838	1.3885	1.39945	1.40633	1.41779	1.42131	1.43081	1.43376	1.44419	1.44565	1.45497	1.45812	1.4671	1.47004	1.47893	1.48024	1.48942	1.48753	1.50076	1.50367	1.51058	1.50799	1.51769	1.51641	1.52594	1.52617	1.53494	1.53762	1.54858
5	703	0	0.41218	0.914356	1.06506	1.12361	1.14596	1.16546	1.18105	1.19408	1.20644	1.219	1.2317	1.24703	1.25857	1.26915	1.27938	1.28702	1.29503	1.30351	1.31077	1.31899	1.32657	1.33761	1.34181	1.35105	1.3565	1.36332	1.36958	1.37608	1.38109	1.38823	1.39386	1.39989	1.40566	1.41129	1.41621	1.41883	1.42734	1.43381	1.43527	1.43693	1.44235	1.44585	1.45151	1.4576	1.4624	1.46835	1.47526
6	705	0	0.409829	0.498689	0.569129	0.605238	0.63852	0.662826	0.694127	0.719628	0.751744	0.771533	0.793886	0.804727	0.822301	0.829733	0.845791	0.850862	0.864268	0.86861	0.88123	0.883853	0.896239	0.900202	0.909907	0.911423	0.921623	0.921594	0.932348	0.930687	0.940304	0.940013	0.949834	0.948493	0.957237	0.955605	0.965047	0.959714	0.973033	0.9721	0.980085	0.973266	0.984632	0.981047	0.992792	0.991801	1.00358	1.00151	1.01494
7	707	0	0.39516	0.584332	0.638103	0.671647	0.694729	0.706328	0.720784	0.724572	0.731596	0.73215	0.731712	0.736521	0.743341	0.747567	0.755902	0.761556	0.767326	0.773738	0.779159	0.784113	0.789242	0.7958	0.797315	0.801541	0.803319	0.805942	0.809002	0.81043	0.812353	0.815763	0.817716	0.819785	0.822	0.823399	0.825585	0.82369	0.829111	0.832666	0.833133	0.831064	0.834619	0.836368	0.840739	0.844499	0.848929	0.852572	0.858488
8	708	0	-0.00615905	0.185461	0.23486	0.258146	0.341963	0.305708	0.396812	0.417212	0.446764	0.466786	0.480892	0.497678	0.511988	0.521285	0.53746	0.545591	0.560396	0.572986	0.58817	0.598079	0.611718	0.619936	0.633313	0.640599	0.649372	0.660475	0.666683	0.67598	0.681983	0.694865	0.701044	0.711594	0.717073	0.722522	0.731936	0.737852	0.749072	0.758806	0.763761	0.763965	0.776118	0.780927	0.7934	0.796868	0.806311	0.81383	0.826041
9	715	0	0.181439	0.764256	0.919243	0.966193	0.988838	0.993151	1.00099	1.00825	1.0151	1.01717	1.02952	1.03279	1.04208	1.05462	1.06094	1.07006	1.0837	1.0958	1.10025	1.1111	1.11719	1.13042	1.1336	1.14435	1.15062	1.15811	1.16516	1.17166	1.18005	1.18626	1.19407	1.20077	1.20899	1.19515	1.20045	1.20357	1.21552	1.22202	1.22613	1.22887	1.23484	1.23997	1.24562	1.25294	1.2599	1.2671	1.27255
10	Geobacillus stearothermophilis esterase	0	0.952107	1.28589	1.48381	1.59452	1.67924	1.73572	1.76598	1.79337	1.82141	1.84099	1.85862	1.87127	1.8838	1.89025	1.89753	1.9026	1.90802	1.91376	1.91907	1.92545	1.9307	1.93705	1.93912	1.94308	1.94536	1.94815	1.95171	1.95328	1.95614	1.95926	1.96138	1.96316	1.96651	1.96742	1.9701	1.9685	1.97465	1.97747	1.97849	1.97651	1.98036	1.98094	1.98549	1.98898	1.99304	1.99577	2.00207
11	Bacillus subilis esterase	0	0.706076	1.0878	1.23716	1.28615	1.30906	1.3225	1.3357	1.34319	1.35158	1.35723	1.36373	1.36913	1.373	1.3753	1.38174	1.38696	1.39498	1.40305	1.40911	1.41328	1.41771	1.42333	1.42496	1.42878	1.43146	1.43487	1.44006	1.43992	1.4442	1.44615	1.45052	1.4514	1.45408	1.45457	1.4581	1.456	1.46311	1.46437	1.46623	1.4639	1.46795	1.46888	1.47326	1.47719	1.48107	1.48468	1.49065
12	Aspergilis oryzae lipase	0	0.13852	0.279984	0.299977	0.312917	0.315627	0.317405	0.321106	0.323991	0.328217	0.331452	0.335998	0.338068	0.341215	0.342439	0.345878	0.348997	0.350833	0.354242	0.357303	0.360159	0.364064	0.371933	0.374031	0.381259	0.387437	0.393383	0.400377	0.405565	0.410869	0.416377	0.421273	0.424945	0.430045	0.433105	0.43771	0.438788	0.447065	0.451961	0.454788	0.455663	0.468136	0.47073	0.476879	0.482329	0.488071	0.493142	0.500282
13	Candita antarctica lipase A	0	0.23691	0.360071	0.388661	0.395189	0.399095	0.40096	0.406293	0.409412	0.414599	0.417601	0.421302	0.419787	0.421273	0.418883	0.420574	0.420166	0.419146	0.421419	0.421419	0.42139	0.422264	0.425499	0.424129	0.425528	0.425732	0.426169	0.428005	0.427626	0.427685	0.429054	0.430045	0.430337	0.43194	0.432231	0.433251	0.430279	0.436253	0.438526	0.438847	0.436282	0.439692	0.439663	0.444297	0.44759	0.451612	0.454701	0.460763
14	Candita antarctica lipase B	0	0.284647	0.63411	0.777934	0.844703	0.881133	0.905788	0.925373	0.941693	0.958509	0.970225	0.982495	0.992666	1.00016	1.00721	1.014	1.01968	1.02434	1.02877	1.03315	1.03749	1.04128	1.04722	1.04888	1.05189	1.05328	1.05585	1.05789	1.05885	1.06042	1.06302	1.06459	1.06544	1.06724	1.06762	1.06905	1.06611	1.07232	1.07438	1.07473	1.07211	1.07552	1.07526	1.07852	1.08153	1.08537	1.08779	1.09298
15	Rhizopus oryzae esterase	0	0.165362	0.0691873	0.0645243	0.0540617	0.0430162	0.0396064	0.0355845	0.0432493	0.0392858	0.0366337	0.0341565	0.0321747	0.0305135	0.0283569	0.0241893	0.0231984	0.0194097	0.0175445	0.0144262	0.0126192	0.00903457	0.00894714	0.00766481	0.00527502	0.0035264	0.000670307	-0.00169034	-0.00340982	-0.00623677	-0.00859741	-0.00999631	-0.0109289	-0.0139307	-0.0150382	-0.01804	-0.0200218	-0.0255008	-0.0224116	-0.0241019	-0.0261711	-0.032029	-0.0317376	-0.0339233	-0.0329325	-0.0325827	-0.0318833	-0.0328159
16	Aspergilis oryzae phospholipase	0	0.0757738	0.132284	0.163846	0.133012	0.1062	0.123132	0.154433	0.156589	0.156269	0.156007	0.16201	0.16064	0.162389	0.161194	0.164225	0.163088	0.164575	0.167956	0.170112	0.174047	0.176815	0.182061	0.183635	0.185879	0.188065	0.188735	0.193981	0.195205	0.19777	0.201908	0.204414	0.206221	0.209864	0.211963	0.214906	0.21476	0.222892	0.225777	0.229187	0.227409	0.232888	0.235103	0.241194	0.247023	0.247693	0.256582	0.264596
17	Pseudomonas sp. lipoprotein lipase	0	0.683713	1.17767	1.18172	1.19746	1.20952	1.19927	1.20236	1.20469	1.20746	1.21087	1.22252	1.22975	1.2387	1.24572	1.25476	1.26053	1.26761	1.2751	1.28101	1.28676	1.29264	1.30004	1.30415	1.3089	1.31202	1.31657	1.32042	1.32356	1.32601	1.3303	1.33158	1.33446	1.33624	1.33773	1.33916	1.33653	1.34172	1.3442	1.34434	1.34137	1.34332	1.34396	1.34647	1.34906	1.35189	1.35349	1.35792
18	Bovine pancreas phospholipase	0	0.114943	0.297849	0.358352	0.369077	0.37476	0.376333	0.380326	0.383415	0.391954	0.401164	0.414104	0.422963	0.428588	0.433368	0.439692	0.443597	0.447007	0.450359	0.452544	0.45473	0.458781	0.463094	0.464639	0.467553	0.468807	0.470701	0.473674	0.474664	0.476705	0.479473	0.481368	0.483029	0.486205	0.487837	0.489528	0.4881	0.495123	0.498533	0.500865	0.496639	0.501448	0.502176	0.507218	0.510948	0.515757	0.518555	0.526074
	MasterMix+BHET	0	0.248859	0.36421	0.309769	0.278294	0.265383	0.288727	0.30805	0.309711	0.316501	0.318716	0.324254	0.325536	0.326352	0.325973	0.328392	0.327722	0.329325	0.329354	0.332763	0.331627	0.338359	0.337835	0.348676	0.340487	0.34445	0.348618	0.345995	0.346344	0.348035	0.350599	0.359896	0.354942	0.359605	0.36045	0.370009	0.359663	0.367037	0.369514	0.371379	0.368989	0.37269	0.372545	0.377383	0.38123	0.386009	0.388836	0.394985
	MaserMix No BHET	0	-0.0176232	0.235811	0.251986	0.255658	0.271658	0.301326	0.316801	0.332452	0.341807	0.347869	0.354776	0.359643	0.363373	0.365617	0.36824	0.369289	0.371475	0.373719	0.376983	0.380043	0.383453	0.387242	0.388728	0.390827	0.393012	0.394382	0.396451	0.397267	0.398899	0.399541	0.401085	0.401785	0.40295	0.40397	0.405165	0.405748	0.40671	0.40738	0.407847	0.408633	0.409595	0.409712	0.41079	0.411227	0.41248	0.412218	0.413704
	lysate	0	0.261915	0.374672	0.406876	0.423342	0.432085	0.438147	0.445346	0.450067	0.457819	0.468165	0.475306	0.47959	0.483174	0.485681	0.489819	0.493375	0.496114	0.499291	0.502468	0.505353	0.509025	0.514533	0.516107	0.519254	0.521936	0.524238	0.527823	0.531203	0.533389	0.537294	0.540471	0.544347	0.547961	0.549914	0.553527	0.553586	0.561455	0.566584	0.568915	0.569236	0.574919	0.578212	0.584274	0.590832	0.596369	0.602372	0.609717
[truncated: 49 more columns]

## Sheet: STDEV
Trial 1
	Hours	0	0.25	0.5	0.75	1	1.25	1.5	1.75	2	2.25	2.5	2.75	3	3.25	3.5	3.75	4	4.25	4.5	4.75	5	5.25	5.5	5.75	6	6.25	6.5	6.75	7	7.25	7.5	7.75	8	8.25	8.5	8.75	9	9.25	9.5	9.75	10	10.25	10.5	10.75	11	11.25	11.5	11.75
1	T. fusca cutinase	0	0.0286556	0.0272776	0.0205648	0.0249715	0.0195321	0.0261659	0.0237057	0.031408	0.0250281	0.0310713	0.0249835	0.0313182	0.0245707	0.0298878	0.0213664	0.0268991	0.0193758	0.0249652	0.017464	0.023368	0.0172631	0.0242822	0.0178495	0.0235245	0.0170555	0.0227935	0.0165009	0.0223818	0.0162636	0.02193	0.0156904	0.0213125	0.0155618	0.0209304	0.014983	0.0207693	0.0150779	0.0205468	0.0148446	0.0203008	0.0142497	0.0201018	0.0141407	0.0197811	0.0141514	0.0197864	0.0139775
2	I. sakiensis PETase	0	0.0364357	0.0311299	0.0296353	0.0171004	0.0119622	0.0140005	0.0168743	0.0178119	0.0180419	0.0174319	0.0182395	0.0174804	0.0176381	0.017598	0.0169353	0.0167255	0.0168749	0.0163114	0.0163117	0.0159507	0.0161344	0.0157138	0.0159676	0.0156614	0.0157991	0.0153735	0.0154648	0.015233	0.0153659	0.0151397	0.0152395	0.0150602	0.0151947	0.0149754	0.0152435	0.0149534	0.0151335	0.0148177	0.0151014	0.0147726	0.015027	0.0149433	0.015119	0.0148	0.0149791	0.0149179	0.0150474
3	501	0	0.0142836	0.00417193	0.0192333	0.0408001	0.0206475	0.0470933	0.0296985	0.0532451	0.0313955	0.0556493	0.0326683	0.0575585	0.0334462	0.0572756	0.0323855	0.0562857	0.0316077	0.056215	0.0312541	0.0555786	0.0313955	0.0556493	0.031042	0.0555786	0.0299813	0.0545886	0.0295571	0.0557907	0.0299813	0.05572	0.0289914	0.0541644	0.0306177	0.0555079	0.0293449	0.0554372	0.0297692	0.0555079	0.030052	0.0559321	0.0290621	0.05671	0.0296278	0.0558614	0.0304763	0.0573464	0.0307591
4	702	0	0.0345683	0.0182748	0.0216281	0.0183576	0.0199951	0.0121006	0.00952908	0.0106251	0.00877857	0.0102002	0.0107816	0.0115846	0.0115093	0.0123988	0.0120018	0.0129786	0.012721	0.0132605	0.0128345	0.0136596	0.0132308	0.0141903	0.0136596	0.0141478	0.0138399	0.0145139	0.0140678	0.0147846	0.0145139	0.0150243	0.0143612	0.0151555	0.0146548	0.0152876	0.0148827	0.0153962	0.0148062	0.0154746	0.0149045	0.0154649	0.013543	0.0124263	0.0101	0.00969141	0.00829779	0.0081304	0.00701498
5	703	0	0.00646452	0.00992421	0.0183919	0.0185389	0.016376	0.0170317	0.0170741	0.017476	0.0172541	0.0183222	0.0204688	0.0180935	0.0169726	0.0181725	0.0175092	0.0185942	0.0184814	0.0188725	0.018446	0.019527	0.0188518	0.0197298	0.0191262	0.0196924	0.01905	0.0197145	0.0189932	0.0195244	0.0191628	0.0196792	0.0188982	0.01951	0.0189185	0.0193629	0.0187873	0.0193195	0.0187904	0.0193996	0.018834	0.0194896	0.0188796	0.0196792	0.018784	0.0197059	0.0188908	0.0197477	0.0188959
6	705	0	0.00415812	0.00814269	0.0191106	0.0363299	0.0202191	0.0414164	0.0274044	0.0463997	0.0287632	0.0483494	0.0297839	0.0498984	0.0304083	0.0496689	0.029557	0.0488657	0.0289332	0.0488083	0.0286498	0.048292	0.0287632	0.0483494	0.0284799	0.048292	0.0276307	0.0474891	0.0272913	0.0484641	0.0276307	0.0484067	0.026839	0.047145	0.0281401	0.0482347	0.0271216	0.0481773	0.0274609	0.0482347	0.0276872	0.0485788	0.0268955	0.0492099	0.0273478	0.0485215	0.0280268	0.0497263	0.0282533
7	707	0	0.0510639	0.0683044	0.0608055	0.0532263	0.0477059	0.0449785	0.0437066	0.0434677	0.0435469	0.0433858	0.0428019	0.043165	0.0432033	0.0425793	0.0410831	0.0369282	0.0324127	0.0303185	0.0293655	0.0284363	0.0277436	0.0265852	0.0269741	0.0268535	0.0265316	0.0266504	0.0263906	0.0266513	0.0264363	0.0265565	0.026308	0.026386	0.0260799	0.0263444	0.026084	0.0259409	0.0258639	0.0261554	0.0257938	0.0255551	0.0255578	0.0254292	0.0258107	0.0256568	0.0256067	0.0254638	0.0259257
8	708	0	0.839016	0.77695	0.82076	0.833566	0.7186	0.868166	0.728359	0.738971	0.742745	0.744547	0.747219	0.745656	0.746177	0.749388	0.742137	0.74638	0.7351	0.730362	0.720763	0.719403	0.713594	0.720517	0.707614	0.711539	0.708506	0.701003	0.704495	0.69933	0.699449	0.689492	0.690043	0.680405	0.684681	0.684512	0.676667	0.670521	0.6679	0.662387	0.660632	0.663725	0.654148	0.653865	0.643909	0.651763	0.647348	0.645192	0.639069
9	715	0	0.300522	0.263971	0.259432	0.27527	0.274801	0.278114	0.279273	0.278789	0.276998	0.282533	0.279575	0.283129	0.279185	0.280323	0.28895	0.286886	0.275032	0.269123	0.275664	0.269473	0.272687	0.268233	0.271993	0.267477	0.267105	0.266501	0.267182	0.266023	0.26171	0.264362	0.261369	0.260551	0.256867	0.296401	0.297595	0.297186	0.294512	0.296016	0.295267	0.291031	0.291555	0.289217	0.29004	0.28787	0.286612	0.28463	0.28951
10	Geobacillus stearothermophilis esterase	0	0.0350029	0.0789593	0.0763889	0.0467276	0.0675426	0.0728665	0.0729237	0.0734375	0.0748177	0.0747789	0.0752047	0.0752127	0.0724753	0.0711749	0.0698597	0.0689797	0.0687152	0.069282	0.069547	0.0695779	0.0702892	0.0703154	0.0705893	0.0707807	0.0711064	0.0717071	0.0716751	0.0722155	0.0721804	0.0727561	0.0729364	0.0733631	0.0715143	0.0721159	0.0720009	0.0725125	0.0726424	0.0730207	0.0729696	0.0734807	0.0734717	0.0738974	0.0738654	0.073729	0.074235	0.074153	0.0744582
11	Bacillus subilis esterase	0	0.0272742	0.0696012	0.0734099	0.0743445	0.0726002	0.0709205	0.0711148	0.0708932	0.0710303	0.071019	0.0712336	0.0714882	0.072275	0.0732304	0.0747707	0.0761207	0.0759023	0.0739647	0.0736742	0.0743742	0.0740966	0.0744882	0.0743608	0.0751107	0.075259	0.0753704	0.0759055	0.0753851	0.0753598	0.0751712	0.0752452	0.0750773	0.0751964	0.0752542	0.0752442	0.0750304	0.0756541	0.0755063	0.0757916	0.0758928	0.0753974	0.0761116	0.0761924	0.0758724	0.0766029	0.07642	0.0763913
12	Aspergilis oryzae lipase	0	0.0808981	0.0396936	0.0470001	0.0509723	0.0510036	0.0494583	0.0489292	0.0459861	0.0440502	0.0414615	0.0398292	0.0369343	0.0360205	0.0339429	0.031984	0.0316394	0.0285049	0.0273215	0.0257663	0.0244296	0.0238019	0.0257016	0.0261087	0.027847	0.0293694	0.0308837	0.0311963	0.0311548	0.0320589	0.0328932	0.0336972	0.0352379	0.0367139	0.0381452	0.0402456	0.0421114	0.0437072	0.0454449	0.047662	0.0492001	0.0632358	0.064492	0.0654685	0.0665563	0.067676	0.0684386	0.0692385
13	Candita antarCSica lipase A	0	0.00651562	0.00471593	0.00616468	0.00618574	0.00560268	0.00502029	0.00701878	0.01125	0.014729	0.0167255	0.020826	0.0220597	0.0211178	0.0220735	0.0190322	0.0198938	0.021001	0.0188004	0.0185429	0.0175454	0.0168951	0.016524	0.0155722	0.0147571	0.0136963	0.013123	0.0124344	0.0122394	0.0116092	0.0114583	0.0105358	0.00995791	0.00992186	0.00939273	0.00840972	0.00820325	0.00788691	0.00695509	0.0073146	0.00644696	0.006278	0.00556447	0.00527668	0.0051316	0.00469184	0.00481352	0.0044456
14	Candita antarCSica lipase B	0	0.0138286	0.0108088	0.00984344	0.00824035	0.00689734	0.00614356	0.00566657	0.00540093	0.00506853	0.00518106	0.0047085	0.00474377	0.00477598	0.00479305	0.00449704	0.00416773	0.00444672	0.00418609	0.00445009	0.00472687	0.00461194	0.00478574	0.0049	0.00496689	0.00524309	0.0053929	0.0056	0.00565715	0.0062554	0.00629524	0.00675056	0.00695869	0.0072404	0.00720023	0.00754078	0.00767268	0.00784368	0.00805729	0.00826458	0.00836441	0.00849294	0.00885739	0.00889288	0.00905152	0.00932166	0.00940443	0.00958454
15	Rhizopus oryzae esterase	0	0.017587	0.0459356	0.0431702	0.0457354	0.0455435	0.0424681	0.0431015	0.0320127	0.034776	0.0343817	0.0361117	0.0361403	0.0370418	0.0372682	0.037135	0.0373621	0.038439	0.0375697	0.0386474	0.0387816	0.039199	0.0386526	0.0385018	0.0395261	0.0391678	0.0404414	0.040602	0.0407371	0.0418286	0.0409429	0.0423722	0.0408286	0.0426447	0.0416234	0.0425612	0.0426629	0.0439563	0.0437617	0.0452869	0.044587	0.0456885	0.0449889	0.0456095	0.0460453	0.0473557	0.0460009	0.0496348
16	Aspergilis oryzae phospholipase	0	0.0155	0.0355374	0.0215641	0.018071	0.0183191	0.0122769	0.0102652	0.0109494	0.0109002	0.0110546	0.0107742	0.0113583	0.0116529	0.011809	0.0118503	0.0123622	0.01171	0.0124012	0.0119517	0.0123527	0.0120542	0.0126021	0.0120234	0.0126012	0.0120509	0.0125065	0.0130216	0.0127775	0.0127012	0.0126508	0.0128772	0.0127084	0.0132666	0.0125005	0.0128702	0.0119022	0.0128573	0.0125861	0.0124621	0.0125065	0.0123135	0.0124263	0.0122307	0.0125161	0.0122111	0.012307	0.0121558
17	Pseudomonas sp. lipoprotein lipase	0	0.0338886	0.0305965	0.0261003	0.0235763	0.0216809	0.02541	0.0246579	0.0278283	0.0287935	0.0302276	0.0301279	0.0312443	0.0315508	0.0317328	0.0322559	0.032317	0.0328662	0.0324071	0.0326537	0.0318488	0.0301806	0.0302373	0.0304861	0.0303912	0.0309647	0.0310471	0.0315678	0.031379	0.0318418	0.031802	0.0319633	0.0319384	0.0321466	0.0323594	0.032797	0.032564	0.0329328	0.0332188	0.0335478	0.0334112	0.0335595	0.0336192	0.0337676	0.0336868	0.0340676	0.0339827	0.0340059
18	Bovine pancreas phospholipase	0	0.0536751	0.0499582	0.0339946	0.0284662	0.0276862	0.0283525	0.0267022	0.02705	0.0272867	0.0276178	0.0249073	0.02465	0.0233853	0.0257472	0.025015	0.0240117	0.0239953	0.0233789	0.0233415	0.0226774	0.0222987	0.0220218	0.0215818	0.0219117	0.021485	0.0212698	0.0212006	0.0212392	0.0209588	0.0209553	0.0207996	0.0207567	0.0201778	0.0205371	0.0205432	0.0204974	0.0203185	0.0201827	0.0196505	0.019637	0.0192242	0.0202342	0.0195595	0.0195264	0.0194494	0.0192204	0.0190421
22	lysate	0	0.0431002	0.069571	0.0672441	0.0649093	0.0642425	0.0634376	0.0629238	0.0623867	0.0612726	0.0544897	0.0528925	0.0518629	0.0510798	0.0503719	0.0498826	0.0493703	0.0491798	0.0489485	0.0487249	0.0485966	0.0484629	0.0483798	0.0482909	0.0483438	0.0483502	0.0482935	0.0483515	0.048205	0.0481429	0.04812	0.0480787	0.047762	0.0475444	0.0470757	0.0467719	0.0462986	0.0458542	0.0453539	0.045326	0.0450334	0.0450388	0.0448212	0.044797	0.04475	0.044958	0.0449404	0.0449717
23	MasterMix+BHET	0	0.0153956	0.013476	0.0359071	0.0375665	0.0345317	0.0293014	0.0284662	0.033647	0.032666	0.0341923	0.0343651	0.0346158	0.0345332	0.0349939	0.0347887	0.0353459	0.036005	0.0362605	0.0361053	0.0367304	0.0365136	0.036571	0.0368619	0.0367304	0.0367875	0.0366884	0.03655	0.0362359	0.0352386	0.033912	0.0329824	0.032078	0.0310952	0.0303688	0.0293355	0.0290964	0.0283474	0.0280311	0.0273507	0.0271972	0.0268882	0.0266703	0.0263944	0.0263963	0.0260177	0.0261146	0.025652
24	MaserMix No BHET	0	0.00875267	0.0225688	0.0269228	0.0285916	0.0223406	0.01822	0.021435	0.0229436	0.025086	0.0263904	0.0274221	0.0281525	0.027295	0.0279238	0.0275259	0.0277027	0.0282621	0.0279263	0.0271061	0.026204	0.0266903	0.0266743	0.0274101	0.0279028	0.0281988	0.0286584	0.0287258	0.029354	0.0295465	0.0295694	0.0295924	0.0297531	0.0296279	0.0296884	0.0296227	0.0293939	0.0295723	0.0295604	0.0295241	0.0297428	0.0295352	0.0296226	0.0294546	0.0294947	0.0296013	0.0296763	0.0294746
25
Trial 2
	Hours	0	0.25	0.5	0.75	1	1.25	1.5	1.75	2	2.25	2.5	2.75	3	3.25	3.5	3.75	4	4.25	4.5	4.75	5	5.25	5.5	5.75	6	6.25	6.5	6.75	7	7.25	7.5	7.75	8	8.25	8.5	8.75	9	9.25	9.5	9.75	10	10.25	10.5	10.75	11	11.25	11.5	11.75
1	T. fusca cutinase	0	0.0259485	0.0163882	0.0109441	0.0207418	0.0198316	0.0232	0.0234726	0.0232184	0.0229876	0.0242011	0.0241102	0.0238025	0.0234629	0.0209001	0.0216	0.0222816	0.0232259	0.0241276	0.0248081	0.025064	0.0254559	0.026074	0.0254572	0.027293	0.0251066	0.0269941	0.027087	0.0273551	0.0269419	0.0274651	0.0273145	0.0276919	0.0275222	0.0280083	0.0276964	0.0283474	0.0273453	0.0281266	0.0277487	0.0284444	0.0262966	0.0285505	0.0277388	0.0286707	0.0281202	0.0291426	0.0283782
2	I. sakiensis PETase	0	0.00557584	0.00460036	0.00424421	0.00540494	0.00474271	0.00543722	0.0036756	0.00296873	0.00350286	0.00245764	0.0035	0.00207926	0.00363639	0.00204206	0.00331512	0.00184481	0.00316596	0.00186815	0.00302655	0.00166233	0.00261024	0.00198578	0.00263502	0.00202567	0.00257941	0.00217945	0.00238956	0.00223681	0.00243379	0.00222785	0.00215484	0.00240901	0.00220076	0.00245425	0.002	0.00271539	0.002	0.00269629	0.00201329	0.00288848	0.00216564	0.00283608	0.00201329	0.00293655	0.00195533	0.00306649	0.00184481
3	501	0	0.0357605	0.0256133	0.0122932	0.0263848	0.0128157	0.0224983	0.00998065	0.018592	0.0103079	0.0181693	0.0106758	0.0175161	0.0122198	0.0171797	0.0136826	0.0165784	0.0146155	0.0161091	0.015885	0.016273	0.016181	0.0162525	0.0169471	0.0161787	0.0181248	0.0163589	0.0178412	0.0165657	0.0191196	0.0163184	0.0188167	0.0165882	0.0190393	0.0163009	0.0192468	0.0166133	0.016432	0.0271581	0.0191745	0.0271104	0.0185113	0.0268649	0.0190427	0.0266331	0.0189635	0.0266391	0.0192832
4	702	0	0.00759737	0.00945639	0.00832887	0.00761512	0.00732211	0.00559732	0.005469	0.00673003	0.00555698	0.00410406	0.00292973	0.00277849	0.00260576	0.00294449	0.00285832	0.00289367	0.00269629	0.00278747	0.00265769	0.00265769	0.00245425	0.00277128	0.00238607	0.00248261	0.00246644	0.00257358	0.00208806	0.00240069	0.00221435	0.00225389	0.00205508	0.00217025	0.00199249	0.00211266	0.00185023	0.00185831	0.00167432	0.0017673	0.00150111	0.00175784	0.00198578	0.0020232	0.00181751	0.00183394	0.00180278	0.00181475	0.00174738
5	703	0	0.0253961	0.0194584	0.0192031	0.0208706	0.0186594	0.0223753	0.0199886	0.0222446	0.0211395	0.0210348	0.0211812	0.022117	0.0212255	0.0224487	0.02155	0.0229073	0.0218367	0.0222361	0.0218573	0.0222716	0.0222083	0.0223363	0.0213357	0.0223308	0.0221618	0.0226791	0.0221969	0.0225837	0.0220157	0.0226974	0.0221789	0.0224729	0.0218575	0.0222327	0.0217718	0.0225154	0.0227157	0.0242617	0.0246812	0.026119	0.0264848	0.0277511	0.0272157	0.0277583	0.0268006	0.0274464	0.0264823
6	705	0	0.00642599	0.00489524	0.00711266	0.00695006	0.00625167	0.00547753	0.00345881	0.00410163	0.00446766	0.00372693	0.00345977	0.00387427	0.00379781	0.00386566	0.00355949	0.00355715	0.00352184	0.00340735	0.00329697	0.00326241	0.00333816	0.0031628	0.00319427	0.00323161	0.00313741	0.00306649	0.00299388	0.00313741	0.00295014	0.00293087	0.00283608	0.00288444	0.00295014	0.0028746	0.00291033	0.00272274	0.00274287	0.00266333	0.00275923	0.00271846	0.00276225	0.00260832	0.00251462	0.00248797	0.0026839	0.00263502	0.00261024
7	707	0	0.0179786	0.0395971	0.0364029	0.0382783	0.0392268	0.0405956	0.0402567	0.0390424	0.0386355	0.0377197	0.0368038	0.0362989	0.0354583	0.0346787	0.0344344	0.0332602	0.0327338	0.0319894	0.0312703	0.0304973	0.0294711	0.0284533	0.0277217	0.0268891	0.0259752	0.0250444	0.0239725	0.0231651	0.0219623	0.0210279	0.0200828	0.0193066	0.0187593	0.0179677	0.0176587	0.0177034	0.0175852	0.0174646	0.0177714	0.0176415	0.0175032	0.017546	0.0169152	0.0173696	0.0170467	0.0170666	0.0176639
8	708	0	0.0123001	0.0117577	0.0129017	0.0123406	0.0126194	0.0124017	0.0117898	0.0115326	0.0109124	0.0119442	0.0112303	0.0119626	0.0120835	0.0117228	0.0111689	0.0109436	0.0108871	0.0107565	0.010813	0.0110573	0.0105447	0.0107686	0.010845	0.0106514	0.0108648	0.010845	0.0104844	0.0102909	0.0105813	0.0104561	0.0104433	0.010387	0.0101237	0.0101658	0.0103607	0.0100002	0.00997514	0.0102378	0.00993244	0.0100426	0.0101474	0.00979864	0.00975551	0.00996209	0.00974389	0.00967798	0.00972163
9	715	0	0.0190733	0.0116384	0.0147517	0.0176896	0.0174248	0.0168049	0.0164037	0.0161397	0.0159331	0.0160599	0.0158531	0.015692	0.0156003	0.0156756	0.015388	0.0154787	0.0153549	0.0152974	0.0154043	0.0152494	0.0151414	0.0151165	0.0150839	0.0149868	0.0152172	0.0150957	0.0149868	0.015064	0.0152172	0.0152893	0.0156353	0.0157102	0.0163506	0.0164912	0.0162032	0.0161711	0.0156272	0.0154047	0.0157912	0.0162963	0.0166952	0.0169889	0.0173144	0.0174253	0.0177678	0.0180705	0.0182927
10	Geobacillus stearothermophilis esterase	0	0.00967178	0.00705715	0.0163781	0.0160689	0.0119528	0.0148843	0.0139528	0.0130985	0.0141825	0.0139644	0.0139937	0.0139937	0.014093	0.0142131	0.0143123	0.0142853	0.0160204	0.0163635	0.0173062	0.0144576	0.0145963	0.01461	0.0149591	0.015106	0.0150537	0.0153209	0.0155725	0.015982	0.0158767	0.016217	0.0163219	0.0166206	0.0168003	0.0169873	0.017091	0.0176977	0.0177376	0.0177755	0.0180334	0.0183642	0.0183178	0.0186151	0.0184665	0.0187151	0.0190596	0.0191056	0.0189071
11	Bacillus subilis esterase	0	0.0123427	0.004389	0.0118579	0.0171966	0.0163221	0.0167816	0.0171599	0.0175506	0.0177148	0.0173903	0.0178496	0.0177485	0.0172978	0.016869	0.0169777	0.0169013	0.0169201	0.0166536	0.015908	0.0159061	0.0160811	0.0157367	0.0158197	0.0157367	0.0157912	0.0157329	0.015532	0.0155603	0.0155026	0.015618	0.015473	0.0167144	0.0169167	0.0168298	0.0168589	0.0166277	0.0166866	0.0168586	0.0168298	0.0166566	0.0168316	0.0167435	0.0166866	0.0168598	0.0167444	0.0167435	0.0168911
12	Aspergilis oryzae lipase	0	0.0131412	0.0135532	0.012413	0.026847	0.0278733	0.0284796	0.0272061	0.026733	0.0258041	0.0256637	0.0252702	0.0243003	0.0244606	0.0241034	0.0246812	0.0243607	0.0243607	0.023828	0.0236669	0.0238563	0.023718	0.0239157	0.0236045	0.0236716	0.0237669	0.0237628	0.0235256	0.0234649	0.0241017	0.0240056	0.0240563	0.02435	0.0244508	0.0245017	0.0245001	0.0241001	0.02435	0.0243	0.0242502	0.0242502	0.0242003	0.0243502	0.0242003	0.0242006	0.0243003	0.0242502	0.0243011
13	Candita antarCSica lipase A	0	0.00175594	0.00285715	0.00349619	0.0050362	0.00470567	0.00454569	0.00519615	0.00347707	0.00388887	0.00314325	0.00262742	0.00180093	0.00185831	0.00232881	0.00277849	0.00244336	0.00236925	0.00231157	0.00240069	0.00217945	0.00246644	0.00225019	0.00255408	0.00217945	0.00228692	0.00221435	0.00245764	0.00221886	0.00247857	0.00265016	0.00223681	0.00228692	0.00263502	0.00247588	0.00269072	0.00232451	0.00260832	0.00259422	0.00251462	0.00242143	0.00259422	0.002498	0.00270617	0.00266333	0.002498	0.00251462	0.00259294
14	Candita antarCSica lipase B	0	0.0139005	0.0129781	0.0116758	0.0109637	0.0101504	0.00945745	0.00888426	0.00855648	0.00827305	0.00783986	0.00771643	0.00748955	0.00727461	0.00722934	0.00716752	0.00705337	0.00700024	0.0068821	0.00673573	0.00672012	0.00666408	0.00646864	0.00666408	0.00660908	0.00660908	0.00660908	0.00650231	0.00650026	0.00640026	0.00645006	0.00650026	0.00645058	0.00650103	0.00640234	0.00640104	0.00645006	0.00635164	0.00640104	0.00640104	0.00630423	0.00620108	0.00535942	0.00532009	0.00517333	0.00517333	0.00530786	0.00526783
15	Rhizopus oryzae esterase	0	0.00961735	0.0113808	0.0181364	0.0215873	0.0282836	0.0288639	0.0287058	0.0284762	0.0283198	0.0287632	0.0286623	0.0286908	0.0285984	0.0287089	0.0287065	0.0284427	0.0283474	0.0282929	0.0282364	0.0281798	0.0281976	0.0279718	0.0281584	0.0278769	0.0278004	0.0274596	0.027403	0.027253	0.0274216	0.0273079	0.0272137	0.0269491	0.0269686	0.0269884	0.0268355	0.0267412	0.0266654	0.0263444	0.026421	0.0263821	0.0263637	0.0260799	0.0261362	0.0259097	0.0258721	0.0257962	0.0257018
16	Aspergilis oryzae phospholipase	0	0.00666058	0.0038527	0.00297153	0.0154455	0.0475668	0.0497944	0.041313	0.0417709	0.0373385	0.0400692	0.0382262	0.0373176	0.0367154	0.0372801	0.0352694	0.0355431	0.0381957	0.0365066	0.0362042	0.0342392	0.0348732	0.0343209	0.0349157	0.0348286	0.0338262	0.0344344	0.0343815	0.0342136	0.0348363	0.0346113	0.0338882	0.0351721	0.0347909	0.0346418	0.0348721	0.0349172	0.0345616	0.0352959	0.0342194	0.034897	0.034765	0.0350788	0.0345093	0.0347825	0.0368061	0.0348496	0.0344714
17	Pseudomonas sp. lipoprotein lipase	0	0.0201495	0.0145115	0.016241	0.0137525	0.00922515	0.0101725	0.0107252	0.00961405	0.00777324	0.00539259	0.00762693	0.00836799	0.00906495	0.00779252	0.00762693	0.00799521	0.0068695	0.00734189	0.00703136	0.00758573	0.0076173	0.00773067	0.00760022	0.00789071	0.00718401	0.00786787	0.00839663	0.00823792	0.00830321	0.00836082	0.00850431	0.00890842	0.00884892	0.00862168	0.00867717	0.00945727	0.00906661	0.00925221	0.00925005	0.00909744	0.00979047	0.0100135	0.00998866	0.0104242	0.0102861	0.00995188	0.0102718
18	Bovine pancreas phospholipase	0	0.0255341	0.0242838	0.0203738	0.0195973	0.0192922	0.0194896	0.0195256	0.019433	0.0193415	0.0192385	0.0197616	0.0188312	0.0194425	0.0197707	0.0194618	0.0201585	0.0196985	0.020427	0.0203525	0.0204314	0.0206911	0.0204539	0.0200507	0.0204842	0.0208541	0.0205628	0.0200066	0.0203525	0.0201963	0.0202429	0.0202007	0.0201535	0.0199866	0.0199174	0.019776	0.0198525	0.019961	0.0199751	0.0196868	0.0196798	0.019451	0.0197707	0.0194301	0.0194494	0.0194878	0.0195771	0.0194878
	lysate	0	0.029696	0.0269341	0.0299166	0.0292637	0.0297914	0.0298327	0.0295009	0.0292326	0.028798	0.0287865	0.0284768	0.0283773	0.0282618	0.0280626	0.0281473	0.0281571	0.0283142	0.0281947	0.0281571	0.027891	0.0282252	0.0279847	0.0279791	0.0279791	0.0278561	0.0277566	0.0279808	0.027822	0.0276039	0.0276328	0.0274804	0.0275727	0.0274902	0.0277676	0.0273778	0.027616	0.0275947	0.0274054	0.0274857	0.0271861	0.0269897	0.0266776	0.0260531	0.0260792	0.0261863	0.0265564	0.0266819
	MasterMix+BHET	0	0.00486929	0.0268106	0.00725006	0.0109741	0.00507674	0.007	0.0100127	0.00657445	0.00701166	0.00755138	0.00661236	0.00588246	0.00662898	0.00647482	0.00543691	0.00550848	0.0053966	0.00614898	0.00565066	0.00489932	0.00510718	0.00497427	0.00471204	0.00513939	0.00482735	0.00481802	0.00494402	0.00461447	0.00442869	0.00461122	0.00430155	0.0046694	0.00479479	0.0043501	0.00475114	0.00457967	0.0042194	0.00456399	0.00442757	0.00432666	0.00427122	0.00460471	0.00460471	0.00470354	0.0042194	0.00435546	0.00425676
	MaserMix No BHET	0	0.00421584	0.00659621	0.00401539	0.00466512	0.00478156	0.0051643	0.00646942	0.00246644	0.00254231	0.00453468	0.00566304	0.00574543	0.00514328	0.00517816	0.00546839	0.00612726	0.00622281	0.0062426	0.00626418	0.00648563	0.00685055	0.00681567	0.00702922	0.00729932	0.00746458	0.00775973	0.00775973	0.00773499	0.00806164	0.0080181	0.00820386	0.00857341	0.00857341	0.00861568	0.00866391	0.0086885	0.00870651	0.00864889	0.0089131	0.00908534	0.00900907	0.00894725	0.00918168	0.00904212	0.00914276	0.00951122	0.00920018
Average
	Hours	0	0.25	0.5	0.75	1	1.25	1.5	1.75	2	2.25	2.5	2.75	3	3.25	3.5	3.75	4	4.25	4.5	4.75	5	5.25	5.5	5.75	6	6.25	6.5	6.75	7	7.25	7.5	7.75	8	8.25	8.5	8.75	9	9.25	9.5	9.75	10	10.25	10.5	10.75	11	11.25	11.5	11.75
1	T. fusca cutinase	0	0.027302	0.0218329	0.0157544	0.0228566	0.0196819	0.0246829	0.0235892	0.0273132	0.0240078	0.0276362	0.0245468	0.0275604	0.0240168	0.0253939	0.0214832	0.0245904	0.0213009	0.0245464	0.021136	0.024216	0.0213595	0.0251781	0.0216533	0.0254088	0.0210811	0.0248938	0.0217939	0.0248684	0.0216027	0.0246975	0.0215025	0.0245022	0.021542	0.0244694	0.0213397	0.0245583	0.0212116	0.0243367	0.0212967	0.0243726	0.0202731	0.0243262	0.0209398	0.0242259	0.0211358	0.0244645	0.0211779
2	I. sakiensis PETase	0	0.0210058	0.0178651	0.0169398	0.0112527	0.00835244	0.00971885	0.010275	0.0103903	0.0107724	0.00994475	0.0108698	0.00977982	0.0106373	0.00982003	0.0101252	0.00928517	0.0100204	0.0090898	0.0096691	0.00880649	0.00937234	0.00884979	0.0093013	0.00884354	0.00918923	0.00877646	0.00892718	0.00873489	0.00889983	0.00868377	0.00869719	0.00873461	0.00869775	0.00871484	0.00862173	0.00883438	0.00856676	0.00875698	0.00855736	0.00883055	0.00859631	0.00888971	0.00856613	0.00886828	0.00846722	0.00899219	0.00844609
3	501	0	0.025022	0.0148926	0.0157633	0.0335925	0.0167316	0.0347958	0.0198396	0.0359186	0.0208517	0.0369093	0.0216721	0.0375373	0.022833	0.0372277	0.023034	0.036432	0.0231116	0.036162	0.0235696	0.0359258	0.0237882	0.0359509	0.0239945	0.0358786	0.0240531	0.0354738	0.0236992	0.0361782	0.0245505	0.0360192	0.0239041	0.0353763	0.0248285	0.0359044	0.0242959	0.0360253	0.0231006	0.041333	0.0246133	0.0415213	0.0237867	0.0417874	0.0243352	0.0412473	0.0247199	0.0419927	0.0250212
4	702	0	0.0210829	0.0138656	0.0149785	0.0129863	0.0136586	0.00884894	0.00749904	0.00867758	0.00716777	0.00715211	0.00685568	0.00718155	0.00705752	0.00767164	0.00743006	0.00793612	0.00770864	0.00802397	0.00774608	0.00815862	0.00784251	0.00848077	0.00802281	0.0083152	0.00815318	0.00854374	0.00807794	0.00859263	0.00836412	0.0086391	0.00820812	0.00866289	0.00832365	0.00870012	0.00836644	0.00862726	0.00824025	0.00862095	0.00820279	0.00861137	0.0077644	0.00722476	0.00595875	0.00576267	0.00505028	0.00497257	0.00438118
5	703	0	0.0159303	0.0146913	0.0187975	0.0197048	0.0175177	0.0197035	0.0185313	0.0198603	0.0191968	0.0196785	0.020825	0.0201052	0.019099	0.0203106	0.0195296	0.0207507	0.0201591	0.0205543	0.0201516	0.0208993	0.0205301	0.021033	0.020231	0.0210116	0.0206059	0.0211968	0.0205951	0.0210541	0.0205892	0.0211883	0.0205386	0.0209914	0.020388	0.0207978	0.0202796	0.0209175	0.0207531	0.0218306	0.0217576	0.0228043	0.0226822	0.0237151	0.0229999	0.0237321	0.0228457	0.0235971	0.0226891
6	705	0	0.00529206	0.00651896	0.0131116	0.02164	0.0132354	0.023447	0.0154316	0.0252507	0.0166154	0.0260382	0.0166218	0.0268864	0.017103	0.0267673	0.0165582	0.0262114	0.0162275	0.0261078	0.0159734	0.0257772	0.0160507	0.0257561	0.0158371	0.0257618	0.015384	0.0252778	0.0151426	0.0258008	0.0152904	0.0256688	0.0148376	0.0250147	0.0155451	0.0255546	0.015016	0.02545	0.0151019	0.025449	0.0152232	0.0256486	0.0148289	0.0259091	0.0149312	0.0255047	0.0153554	0.0261807	0.0154318
7	707	0	0.0345213	0.0539507	0.0486042	0.0457523	0.0434664	0.042787	0.0419816	0.0412551	0.0410912	0.0405527	0.0398029	0.0397319	0.0393308	0.038629	0.0377588	0.0350942	0.0325733	0.031154	0.0303179	0.0294668	0.0286074	0.0275193	0.0273479	0.0268713	0.0262534	0.0258474	0.0251815	0.0249082	0.0241993	0.0237922	0.0231954	0.0228463	0.0224196	0.0221561	0.0218713	0.0218221	0.0217246	0.02181	0.0217826	0.0215983	0.0215305	0.0214876	0.0213629	0.0215132	0.0213267	0.0212652	0.0217948
8	708	0	0.425658	0.394354	0.416831	0.422953	0.365609	0.440284	0.370075	0.375252	0.376829	0.378246	0.379225	0.378809	0.37913	0.380555	0.376653	0.378662	0.372993	0.37056	0.365788	0.36523	0.362069	0.365643	0.359229	0.361095	0.359685	0.355924	0.35749	0.35481	0.355015	0.349974	0.350243	0.345396	0.347402	0.347339	0.343514	0.340261	0.338937	0.336312	0.335282	0.336884	0.332148	0.331832	0.326832	0.330863	0.328546	0.327435	0.324396
9	715	0	0.159798	0.137804	0.137092	0.14648	0.146113	0.14746	0.147838	0.147464	0.146466	0.149297	0.147714	0.149411	0.147392	0.147999	0.152169	0.151183	0.145194	0.14221	0.145534	0.142361	0.143914	0.141675	0.143538	0.141232	0.141161	0.140798	0.141084	0.140544	0.138463	0.139826	0.138502	0.138131	0.136609	0.156446	0.156899	0.156679	0.15507	0.155711	0.155529	0.153664	0.154125	0.153103	0.153677	0.152647	0.15219	0.15135	0.153901
10	Geobacillus stearothermophilis esterase	0	0.0223373	0.0430082	0.0463835	0.0313983	0.0397477	0.0438754	0.0434382	0.043268	0.0445001	0.0443717	0.0445992	0.0446032	0.0432842	0.042694	0.042086	0.0416325	0.0423678	0.0428228	0.0434266	0.0420178	0.0424428	0.0424627	0.0427742	0.0429433	0.0430801	0.043514	0.0436238	0.0440988	0.0440286	0.0444865	0.0446292	0.0449918	0.0441573	0.0445516	0.044546	0.0451051	0.04519	0.0453981	0.0455015	0.0459224	0.0458948	0.0462563	0.0461659	0.046222	0.0466473	0.0466293	0.0466827
11	Bacillus subilis esterase	0	0.0198085	0.0369951	0.0426339	0.0457705	0.0444611	0.0438511	0.0441374	0.0442219	0.0443725	0.0442047	0.0445416	0.0446184	0.0447864	0.0450497	0.0458742	0.046511	0.0464112	0.0453092	0.0447911	0.0451401	0.0450889	0.0451124	0.0450902	0.0454237	0.0455251	0.0455516	0.0457187	0.0454727	0.0454312	0.0453946	0.0453591	0.0458958	0.0460565	0.046042	0.0460516	0.0458291	0.0461704	0.0461825	0.0463107	0.0462747	0.0461145	0.0464275	0.0464395	0.0463661	0.0466736	0.0465818	0.0466412
12	Aspergilis oryzae lipase	0	0.0470197	0.0266234	0.0297066	0.0389097	0.0394385	0.038969	0.0380676	0.0363596	0.0349272	0.0335626	0.0325497	0.0306173	0.0302406	0.0290231	0.0283326	0.0280001	0.0264328	0.0255747	0.0247166	0.0241429	0.0237599	0.0248087	0.0248566	0.0257593	0.0265681	0.0273232	0.027361	0.0273099	0.0280803	0.0284494	0.0288767	0.029794	0.0305824	0.0313234	0.0323728	0.0331058	0.0340286	0.0348725	0.0359561	0.0367251	0.043718	0.0444211	0.0448344	0.0453785	0.0459881	0.0463444	0.0467698
13	Candita antarCSica lipase A	0	0.00413578	0.00378654	0.00483044	0.00561097	0.00515417	0.00478299	0.00610747	0.00736355	0.00930893	0.00993439	0.0117267	0.0119303	0.0114881	0.0122012	0.0109053	0.0111686	0.0116851	0.010556	0.0104718	0.00986241	0.00968075	0.0093871	0.00906314	0.0084683	0.00799163	0.00766868	0.007446	0.00722914	0.00704388	0.00705424	0.00638631	0.00612242	0.00627844	0.00593431	0.00555022	0.00526388	0.00524761	0.00477466	0.00491461	0.0044342	0.00443611	0.00403123	0.00399142	0.00389747	0.00359492	0.00366407	0.00351927
14	Candita antarCSica lipase B	0	0.0138645	0.0118934	0.0107596	0.00960204	0.00852386	0.0078005	0.00727541	0.0069787	0.00667079	0.00651046	0.00621247	0.00611666	0.0060253	0.00601119	0.00583228	0.00561055	0.00572348	0.0055341	0.00559291	0.0057235	0.00563801	0.00562719	0.00578204	0.00578799	0.00592609	0.00600099	0.00605115	0.0060787	0.00632783	0.00637265	0.00662541	0.00670463	0.00687071	0.00680129	0.00697091	0.00706137	0.00709766	0.00722917	0.00733281	0.00733432	0.00734701	0.0071084	0.00710648	0.00711242	0.00724749	0.00735614	0.00742618
15	Rhizopus oryzae esterase	0	0.0136022	0.0286582	0.0306533	0.0336614	0.0369135	0.035666	0.0359037	0.0302444	0.0315479	0.0315725	0.032387	0.0324156	0.0328201	0.0329886	0.0329208	0.0329024	0.0333932	0.0329313	0.0334419	0.0334807	0.0336983	0.0333122	0.0333301	0.0337015	0.0334841	0.0339505	0.0340025	0.033995	0.0346251	0.0341254	0.0347929	0.0338888	0.0348066	0.0343059	0.0346983	0.034702	0.0353109	0.0350531	0.035854	0.0354845	0.0360261	0.0355344	0.0358729	0.0359775	0.0366139	0.0358985	0.0376683
16	Aspergilis oryzae phospholipase	0	0.0110803	0.019695	0.0122678	0.0167582	0.032943	0.0310357	0.0257891	0.0263602	0.0241193	0.0255619	0.0245002	0.0243379	0.0241842	0.0245446	0.0235599	0.0239526	0.0249528	0.0244539	0.0240779	0.023296	0.0234637	0.0234615	0.0234696	0.0237149	0.0229385	0.0234705	0.0237016	0.0234955	0.0237688	0.0236311	0.0233827	0.0239403	0.0240288	0.0235712	0.0238712	0.0234097	0.0237094	0.023941	0.0233408	0.0237018	0.0235393	0.0237525	0.02337	0.0236493	0.0245086	0.0235783	0.0233136
17	Pseudomonas sp. lipoprotein lipase	0	0.0270191	0.022554	0.0211706	0.0186644	0.015453	0.0177913	0.0176916	0.0187212	0.0182834	0.0178101	0.0188774	0.0198061	0.0203079	0.0197627	0.0199414	0.0201561	0.0198679	0.0198745	0.0198425	0.0197172	0.018899	0.018984	0.0190432	0.0191409	0.0190744	0.0194575	0.0199822	0.0198085	0.0200725	0.0200814	0.0202338	0.0204234	0.0204978	0.0204905	0.0207371	0.0210106	0.0209997	0.0212355	0.0213989	0.0212543	0.021675	0.0218164	0.0218781	0.0220555	0.0221769	0.0219673	0.0221389
18	Bovine pancreas phospholipase	0	0.0396046	0.037121	0.0271842	0.0240317	0.0234892	0.023921	0.0231139	0.0232415	0.0233141	0.0234282	0.0223344	0.0217406	0.0214139	0.022759	0.0222384	0.0220851	0.0218469	0.021903	0.021847	0.0215544	0.0214949	0.0212379	0.0208162	0.021198	0.0211695	0.0209163	0.0206036	0.0207958	0.0205775	0.0205991	0.0205002	0.0204551	0.0200822	0.0202273	0.0201596	0.020175	0.0201398	0.0200789	0.0196687	0.0196584	0.0193376	0.0200024	0.0194948	0.0194879	0.0194686	0.0193988	0.019265
	lysate	0	0.0363981	0.0482525	0.0485803	0.0470865	0.047017	0.0466351	0.0462124	0.0458096	0.0450353	0.0416381	0.0406847	0.0401201	0.0396708	0.0392172	0.0390149	0.0387637	0.038747	0.0385716	0.038441	0.0382438	0.0383441	0.0381822	0.038135	0.0381614	0.0381031	0.0380251	0.0381661	0.0380135	0.0378734	0.0378764	0.0377795	0.0376674	0.0375173	0.0374217	0.0370748	0.0369573	0.0367245	0.0363796	0.0364058	0.0361098	0.0360142	0.0357494	0.035425	0.0354146	0.0355721	0.0357484	0.0358268
	MasterMix+BHET	0	0.0101324	0.0201433	0.0215786	0.0242703	0.0198042	0.0181507	0.0192394	0.0201107	0.0198388	0.0208718	0.0204887	0.0202491	0.0205811	0.0207343	0.0201128	0.0204272	0.0207008	0.0212047	0.020878	0.0208149	0.0208104	0.0207726	0.020787	0.0209349	0.0208074	0.0207532	0.020747	0.0204252	0.0198337	0.0192616	0.018642	0.0183737	0.017945	0.0173594	0.0170433	0.0168381	0.0162834	0.0162976	0.0158892	0.015762	0.0155797	0.0156375	0.0154995	0.0155499	0.0151185	0.015235	0.0149544
	MaserMix No BHET	0	0.00648426	0.0145825	0.0154691	0.0166284	0.0135611	0.0116921	0.0139522	0.012705	0.0138141	0.0154625	0.0165426	0.016949	0.0162191	0.016551	0.0164971	0.016915	0.0172425	0.0170844	0.0166851	0.0163448	0.0167704	0.016745	0.0172197	0.0176011	0.0178317	0.0182091	0.0182427	0.0185445	0.0188041	0.0187938	0.0188981	0.0191632	0.0191006	0.019152	0.0191433	0.0190412	0.0191394	0.0191046	0.0192186	0.019414	0.0192722	0.0192849	0.0193182	0.0192684	0.019372	0.0195938	0.0193374
[truncated: 49 more columns]

## Sheet: StDev mM
Trial 1
	Hours	0	0.25	0.5	0.75	1	1.25	1.5	1.75	2	2.25	2.5	2.75	3	3.25	3.5	3.75	4	4.25	4.5	4.75	5	5.25	5.5	5.75	6	6.25	6.5	6.75	7	7.25	7.5	7.75	8	8.25	8.5	8.75	9	9.25	9.5	9.75	10	10.25	10.5	10.75	11	11.25	11.5	11.75
1	T. fusca cutinase	0	0.000196511	0.000187062	0.000141027	0.000171247	0.000133945	0.000179438	0.000162567	0.000215387	0.000171635	0.000213077	0.000171329	0.000214771	0.000168499	0.000204961	0.000146524	0.000184466	0.000132874	0.000171204	0.000119763	0.000160251	0.000118385	0.00016652	0.000122406	0.000161324	0.000116961	0.000156311	0.000113158	0.000153487	0.000111531	0.000150389	0.0001076	0.000146155	0.000106718	0.000143535	0.000102749	0.00014243	0.0001034	0.000140904	0.0001018	0.000139217	9.772e-05	0.000137852	9.69728e-05	0.000135653	9.70463e-05	0.000135689	9.58534e-05
2	I. sakiensis PETase	0	0.000249865	0.000213479	0.00020323	0.000117269	8.20329e-05	9.6011e-05	0.000115719	0.000122149	0.000123726	0.000119542	0.000125081	0.000119875	0.000120957	0.000120682	0.000116137	0.000114699	0.000115723	0.000111859	0.00011186	0.000109385	0.000110645	0.00010776	0.000109501	0.000107401	0.000108345	0.000105427	0.000106053	0.000104463	0.000105375	0.000103823	0.000104508	0.000103278	0.000104201	0.000102697	0.000104535	0.000102546	0.000103781	0.000101615	0.000103561	0.000101306	0.00010305	0.000102477	0.000103681	0.000101494	0.000102722	0.000102302	0.00010319
3	501	0	9.79523e-05	2.86098e-05	0.000131896	0.000279795	0.000141594	0.000322952	0.000203663	0.000365139	0.000215301	0.000381626	0.00022403	0.000394719	0.000229364	0.000392779	0.00022209	0.00038599	0.000216756	0.000385505	0.000214331	0.000381141	0.000215301	0.000381626	0.000212877	0.000381141	0.000205603	0.000374352	0.000202693	0.000382596	0.000205603	0.000382111	0.000198814	0.000371443	0.000209967	0.000380656	0.000201239	0.000380171	0.000204148	0.000380656	0.000206088	0.000383566	0.000199299	0.0003889	0.000203178	0.000383081	0.000208997	0.000393264	0.000210937
4	702	0	0.000237059	0.000125323	0.000148319	0.000125891	0.00013712	8.29819e-05	6.53475e-05	7.28639e-05	6.02008e-05	6.99496e-05	7.39371e-05	7.94438e-05	7.89271e-05	8.50272e-05	8.23048e-05	8.90031e-05	8.72367e-05	9.09363e-05	8.80149e-05	9.36731e-05	9.07327e-05	9.73125e-05	9.36731e-05	9.70213e-05	9.491e-05	9.9532e-05	9.64728e-05	0.000101388	9.9532e-05	0.000103032	9.84846e-05	0.000103932	0.000100498	0.000104838	0.000102061	0.000105583	0.000101536	0.00010612	0.00010221	0.000106054	9.28739e-05	8.52159e-05	6.92628e-05	6.64607e-05	5.69038e-05	5.57558e-05	4.81066e-05
5	703	0	4.43317e-05	6.80573e-05	0.000126126	0.000127134	0.000112302	0.000116799	0.000117089	0.000119845	0.000118323	0.000125648	0.000140369	0.00012408	0.000116393	0.000124622	0.000120073	0.000127513	0.00012674	0.000129422	0.000126497	0.00013391	0.00012928	0.000135301	0.000131162	0.000135044	0.000130639	0.000135196	0.00013025	0.000133893	0.000131413	0.000134954	0.000129598	0.000133794	0.000129737	0.000132785	0.000128838	0.000132487	0.000128859	0.000133036	0.000129158	0.000133654	0.000129471	0.000134954	0.000128815	0.000135137	0.000129548	0.000135424	0.000129582
6	705	0	2.85152e-05	5.58401e-05	0.000131054	0.00024914	0.000138657	0.000284021	0.000187931	0.000318195	0.000197249	0.000331566	0.000204249	0.000342188	0.000208531	0.000340614	0.000202693	0.000335106	0.000198415	0.000334713	0.000196472	0.000331172	0.000197249	0.000331566	0.000195306	0.000331172	0.000189483	0.000325666	0.000187155	0.000332352	0.000189483	0.000331959	0.000184054	0.000323306	0.000192976	0.000330779	0.000185992	0.000330385	0.000188319	0.000330779	0.000189871	0.000333139	0.000184442	0.000337467	0.000187543	0.000332746	0.0001922	0.000341008	0.000193753
7	707	0	0.000350181	0.000468411	0.000416985	0.00036501	0.000327153	0.000308449	0.000299726	0.000298088	0.000298632	0.000297526	0.000293523	0.000296012	0.000296275	0.000291996	0.000281736	0.000253243	0.000222277	0.000207915	0.00020138	0.000195008	0.000190258	0.000182313	0.00018498	0.000184153	0.000181945	0.00018276	0.000180979	0.000182766	0.000181292	0.000182117	0.000180412	0.000180948	0.000178848	0.000180662	0.000178876	0.000177895	0.000177367	0.000179366	0.000176886	0.000175249	0.000175268	0.000174386	0.000177002	0.000175946	0.000175603	0.000174623	0.000177791
8	708	0	0.00575372	0.00532809	0.00562853	0.00571634	0.00492794	0.00595362	0.00499487	0.00506764	0.00509352	0.00510588	0.0051242	0.00511349	0.00511706	0.00513908	0.00508935	0.00511845	0.00504109	0.00500861	0.00494278	0.00493345	0.00489361	0.00494109	0.0048526	0.00487952	0.00485872	0.00480727	0.00483121	0.00479579	0.00479661	0.00472833	0.00473211	0.00466601	0.00469534	0.00469418	0.00464038	0.00459823	0.00458025	0.00454245	0.00453041	0.00455163	0.00448595	0.00448401	0.00441573	0.0044696	0.00443932	0.00442453	0.00438255
9	715	0	0.00206089	0.00181023	0.00177911	0.00188772	0.00188451	0.00190722	0.00191517	0.00191185	0.00189957	0.00193753	0.00191724	0.00194162	0.00191456	0.00192237	0.00198153	0.00196738	0.00188609	0.00184556	0.00189042	0.00184796	0.00187001	0.00183946	0.00186525	0.00183428	0.00183173	0.00182758	0.00183225	0.00182431	0.00179473	0.00181291	0.00179239	0.00178678	0.00176152	0.00203263	0.00204082	0.00203802	0.00201968	0.00202999	0.00202485	0.0019958	0.0019994	0.00198336	0.001989	0.00197412	0.0019655	0.00195191	0.00198537
10	Geobacillus stearothermophilis esterase	0	0.000240039	0.000541479	0.000523852	0.000320444	0.000463187	0.000499696	0.000500089	0.000503612	0.000513077	0.000512811	0.000515731	0.000515786	0.000497014	0.000488096	0.000479077	0.000473042	0.000471228	0.000475115	0.000476933	0.000477144	0.000482022	0.000482202	0.00048408	0.000485393	0.000487626	0.000491745	0.000491526	0.000495232	0.000494991	0.000498939	0.000500176	0.000503102	0.000490423	0.000494549	0.000493761	0.000497269	0.00049816	0.000500754	0.000500404	0.000503908	0.000503847	0.000506766	0.000506547	0.000505611	0.000509081	0.000508519	0.000510612
11	Bacillus subilis esterase	0	0.000187038	0.000477304	0.000503423	0.000509832	0.00049787	0.000486352	0.000487684	0.000486164	0.000487104	0.000487027	0.000488499	0.000490244	0.00049564	0.000502192	0.000512755	0.000522013	0.000520515	0.000507227	0.000505236	0.000510036	0.000508132	0.000510818	0.000509944	0.000515086	0.000516103	0.000516867	0.000520537	0.000516968	0.000516795	0.000515501	0.000516009	0.000514858	0.000515674	0.00051607	0.000516002	0.000514536	0.000518813	0.0005178	0.000519756	0.00052045	0.000517053	0.00052195	0.000522504	0.00052031	0.00052532	0.000524066	0.000523868
12	Aspergilis oryzae lipase	0	0.000554775	0.000272207	0.000322313	0.000349553	0.000349767	0.00033917	0.000335541	0.000315359	0.000302083	0.00028433	0.000273137	0.000253284	0.000247018	0.00023277	0.000219336	0.000216974	0.000195478	0.000187362	0.000176698	0.000167531	0.000163226	0.000176254	0.000179045	0.000190966	0.000201407	0.000211791	0.000213935	0.00021365	0.00021985	0.000225572	0.000231085	0.000241651	0.000251773	0.000261588	0.000275992	0.000288788	0.000299731	0.000311648	0.000326851	0.0003374	0.000433652	0.000442266	0.000448963	0.000456423	0.000464102	0.000469331	0.000474816
13	Candita antarctica lipase A	0	4.46822e-05	3.23404e-05	4.22755e-05	4.24199e-05	3.84215e-05	3.44277e-05	4.81327e-05	7.71494e-05	0.000101007	0.000114699	0.000142819	0.000151279	0.00014482	0.000151374	0.000130517	0.000136426	0.000144019	0.000128927	0.000127162	0.000120321	0.000115861	0.000113317	0.000106789	0.0001012	9.39254e-05	8.99936e-05	8.52711e-05	8.39342e-05	7.96123e-05	7.85778e-05	7.22514e-05	6.82884e-05	6.80411e-05	6.44125e-05	5.76713e-05	5.62554e-05	5.4086e-05	4.76959e-05	5.01613e-05	4.42113e-05	4.30527e-05	3.81595e-05	3.61859e-05	3.5191e-05	3.21752e-05	3.30097e-05	3.04866e-05
14	Candita antarctica lipase B	0	9.48323e-05	7.41234e-05	6.75034e-05	5.65098e-05	4.72999e-05	4.21307e-05	3.88596e-05	3.70379e-05	3.47585e-05	3.55301e-05	3.22895e-05	3.25313e-05	3.27522e-05	3.28693e-05	3.08393e-05	2.85811e-05	3.04943e-05	2.87069e-05	3.05174e-05	3.24155e-05	3.16273e-05	3.28192e-05	3.36027e-05	3.40614e-05	3.59555e-05	3.69829e-05	3.84031e-05	3.8795e-05	4.28976e-05	4.31708e-05	4.62933e-05	4.77206e-05	4.96525e-05	4.9377e-05	5.17124e-05	5.26169e-05	5.37896e-05	5.52545e-05	5.6676e-05	5.73606e-05	5.8242e-05	6.07413e-05	6.09847e-05	6.20726e-05	6.39251e-05	6.44928e-05	6.57279e-05
15	Rhizopus oryzae esterase	0	0.000120606	0.000315013	0.000296048	0.00031364	0.000312324	0.000291234	0.000295577	0.000219533	0.000238483	0.00023578	0.000247643	0.000247839	0.000254021	0.000255574	0.000254661	0.000256218	0.000263603	0.000257641	0.000265032	0.000265953	0.000268815	0.000265068	0.000264034	0.000271058	0.000268601	0.000277335	0.000278436	0.000279363	0.000286848	0.000280774	0.000290576	0.00027999	0.000292444	0.00028544	0.000291872	0.000292569	0.000301439	0.000300104	0.000310564	0.000305764	0.000313318	0.00030852	0.000312776	0.000315765	0.000324751	0.00031546	0.000340381
16	Aspergilis oryzae phospholipase	0	0.000106294	0.000243704	0.00014788	0.000123925	0.000125627	8.41916e-05	7.03953e-05	7.50879e-05	7.475e-05	7.58089e-05	7.38862e-05	7.78915e-05	7.99121e-05	8.09828e-05	8.12659e-05	8.47761e-05	8.03034e-05	8.50438e-05	8.19612e-05	8.47113e-05	8.2664e-05	8.64215e-05	8.24532e-05	8.64152e-05	8.26412e-05	8.5766e-05	8.92985e-05	8.76239e-05	8.71009e-05	8.67555e-05	8.83082e-05	8.71504e-05	9.09785e-05	8.57249e-05	8.82603e-05	8.1622e-05	8.81714e-05	8.63117e-05	8.54612e-05	8.5766e-05	8.44426e-05	8.52159e-05	8.38745e-05	8.58318e-05	8.37398e-05	8.4398e-05	8.33608e-05
17	Pseudomonas sp. lipoprotein lipase	0	0.000232398	0.000209821	0.000178988	0.000161679	0.000148681	0.000174254	0.000169097	0.000190838	0.000197457	0.000207292	0.000206608	0.000214264	0.000216366	0.000217614	0.000221201	0.00022162	0.000225387	0.000222238	0.000223929	0.000218409	0.00020697	0.000207358	0.000209065	0.000208414	0.000212347	0.000212912	0.000216482	0.000215188	0.000218362	0.000218089	0.000219195	0.000219024	0.000220452	0.000221911	0.000224912	0.000223314	0.000225843	0.000227805	0.000230061	0.000229124	0.000230141	0.000230551	0.000231568	0.000231014	0.000233626	0.000233043	0.000233202
18	Bovine pancreas phospholipase	0	0.000368087	0.000342598	0.000233124	0.000195212	0.000189863	0.000194433	0.000183116	0.000185501	0.000187124	0.000189395	0.000170807	0.000169042	0.000160369	0.000176567	0.000171545	0.000164665	0.000164552	0.000160326	0.000160069	0.000155515	0.000152917	0.000151019	0.000148001	0.000150264	0.000147337	0.000145862	0.000145387	0.000145652	0.000143729	0.000143705	0.000142637	0.000142343	0.000138373	0.000140837	0.000140879	0.000140565	0.000139338	0.000138407	0.000134757	0.000134665	0.000131834	0.00013876	0.000134133	0.000133906	0.000133378	0.000131808	0.000130585
	lysate	0	0.000295568	0.000477097	0.00046114	0.000445128	0.000440556	0.000435036	0.000431513	0.000427829	0.000420189	0.000373674	0.000362721	0.00035566	0.00035029	0.000345435	0.00034208	0.000338566	0.00033726	0.000335674	0.000334141	0.000333261	0.000332344	0.000331774	0.000331165	0.000331527	0.000331571	0.000331182	0.00033158	0.000330575	0.00033015	0.000329992	0.000329709	0.000327538	0.000326045	0.000322831	0.000320748	0.000317502	0.000314454	0.000311023	0.000310832	0.000308826	0.000308862	0.000307371	0.000307204	0.000306882	0.000308309	0.000308188	0.000308402
	MasterMix+BHET	0	0.000105578	9.24145e-05	0.00024624	0.00025762	0.000236808	0.00020094	0.000195212	0.000230741	0.000224014	0.00023448	0.000235665	0.000237385	0.000236818	0.000239977	0.00023857	0.000242392	0.000246911	0.000248664	0.000247599	0.000251886	0.000250399	0.000250793	0.000252788	0.000251886	0.000252278	0.000251598	0.000250649	0.000248495	0.000241656	0.000232558	0.000226184	0.000219981	0.000213241	0.00020826	0.000201174	0.000199535	0.000194398	0.000192229	0.000187563	0.00018651	0.000184391	0.000182897	0.000181005	0.000181018	0.000178421	0.000179086	0.000175913
	MaserMix No BHET	0	6.00232e-05	0.00015477	0.000184628	0.000196073	0.000153205	0.000124947	0.000146995	0.00015734	0.000172032	0.000180977	0.000188053	0.000193061	0.000187181	0.000191493	0.000188764	0.000189977	0.000193813	0.00019151	0.000185885	0.000179699	0.000183034	0.000182924	0.00018797	0.000191349	0.000193379	0.000196531	0.000196993	0.000201301	0.000202621	0.000202778	0.000202936	0.000204038	0.000203179	0.000203594	0.000203143	0.000201575	0.000202798	0.000202716	0.000202467	0.000203967	0.000202544	0.000203143	0.000201991	0.000202266	0.000202997	0.000203511	0.000202128
Trial 2
	Hours	0	0.25	0.5	0.75	1	1.25	1.5	1.75	2	2.25	2.5	2.75	3	3.25	3.5	3.75	4	4.25	4.5	4.75	5	5.25	5.5	5.75	6	6.25	6.5	6.75	7	7.25	7.5	7.75	8	8.25	8.5	8.75	9	9.25	9.5	9.75	10	10.25	10.5	10.75	11	11.25	11.5	11.75
1	T. fusca cutinase	0	0.000177947	0.000112385	7.50513e-05	0.000142241	0.000135999	0.000159099	0.000160968	0.000159225	0.000157642	0.000165964	0.000165341	0.000163231	0.000160902	0.000143326	0.000148126	0.000152801	0.000159276	0.00016546	0.000170127	0.000171881	0.000174569	0.000178808	0.000174578	0.000187167	0.000172174	0.000185117	0.000185754	0.000187593	0.000184759	0.000188347	0.000187315	0.000189903	0.000188739	0.000192072	0.000189934	0.000194398	0.000187526	0.000192883	0.000190292	0.000195063	0.000180334	0.000195791	0.000190224	0.000196615	0.00019284	0.000199851	0.000194609
2	I. sakiensis PETase	0	3.82374e-05	3.15479e-05	2.91055e-05	3.70654e-05	3.25241e-05	3.72868e-05	2.52061e-05	2.03586e-05	2.40215e-05	1.68538e-05	2.40019e-05	1.4259e-05	2.49373e-05	1.40038e-05	2.27341e-05	1.26512e-05	2.17112e-05	1.28112e-05	2.07552e-05	1.13997e-05	1.79002e-05	1.36179e-05	1.80702e-05	1.38914e-05	1.76888e-05	1.4946e-05	1.63869e-05	1.53394e-05	1.66902e-05	1.5278e-05	1.47772e-05	1.65203e-05	1.50921e-05	1.68305e-05	1.37154e-05	1.86213e-05	1.37154e-05	1.84904e-05	1.38065e-05	1.98083e-05	1.48513e-05	1.9449e-05	1.38065e-05	2.0138e-05	1.34091e-05	2.1029e-05	1.26512e-05
3	501	0	0.000245234	0.000175649	8.43032e-05	0.000180939	8.78865e-05	0.000154287	6.84443e-05	0.000127498	7.06887e-05	0.0001246	7.32116e-05	0.00012012	8.37997e-05	0.000117813	9.38311e-05	0.00011369	0.000100229	0.000110471	0.000108935	0.000111595	0.000110964	0.000111455	0.000116218	0.000110949	0.000124295	0.000112184	0.00012235	0.000113603	0.000131117	0.000111907	0.00012904	0.000113757	0.000130565	0.000111787	0.000131989	0.000113929	0.000112686	0.000186242	0.000131493	0.000185915	0.000126945	0.000184231	0.000130589	0.000182642	0.000130046	0.000182683	0.000132239
4	702	0	5.21005e-05	6.48491e-05	5.71169e-05	5.22222e-05	5.02128e-05	3.83847e-05	3.75048e-05	4.61525e-05	3.81081e-05	2.81444e-05	2.00912e-05	1.9054e-05	1.78695e-05	2.01924e-05	1.96015e-05	1.98439e-05	1.84904e-05	1.91156e-05	1.82257e-05	1.82257e-05	1.68305e-05	1.90046e-05	1.6363e-05	1.7025e-05	1.69141e-05	1.76489e-05	1.43193e-05	1.64632e-05	1.51853e-05	1.54565e-05	1.40931e-05	1.48829e-05	1.36639e-05	1.4488e-05	1.26883e-05	1.27438e-05	1.1482e-05	1.21196e-05	1.02942e-05	1.20547e-05	1.36179e-05	1.38745e-05	1.24639e-05	1.25766e-05	1.23629e-05	1.2445e-05	1.1983e-05
5	703	0	0.000174159	0.00013344	0.000131689	0.000143125	0.000127961	0.000153443	0.000137076	0.000152547	0.000144969	0.00014425	0.000145254	0.000151671	0.000145558	0.000153946	0.000147784	0.000157091	0.00014975	0.000152488	0.000149891	0.000152732	0.000152298	0.000153176	0.000146314	0.000153138	0.000151979	0.000155527	0.00015222	0.000154872	0.000150977	0.000155652	0.000152096	0.000154112	0.000149892	0.000152465	0.000149305	0.000154404	0.000155777	0.000166379	0.000169256	0.000179116	0.000181625	0.000190309	0.000186637	0.000190358	0.00018379	0.000188219	0.000181607
6	705	0	4.40675e-05	3.35701e-05	4.87765e-05	4.76614e-05	4.2872e-05	3.75633e-05	2.37194e-05	2.81277e-05	3.06379e-05	2.55582e-05	2.37261e-05	2.65686e-05	2.60442e-05	2.65095e-05	2.44099e-05	2.43939e-05	2.41517e-05	2.33665e-05	2.26096e-05	2.23726e-05	2.28921e-05	2.16896e-05	2.19053e-05	2.21614e-05	2.15154e-05	2.1029e-05	2.05311e-05	2.15154e-05	2.02312e-05	2.0099e-05	1.9449e-05	1.97806e-05	2.02312e-05	1.97132e-05	1.99581e-05	1.86718e-05	1.88098e-05	1.82643e-05	1.89219e-05	1.86423e-05	1.89426e-05	1.78871e-05	1.72445e-05	1.70618e-05	1.84054e-05	1.80702e-05	1.79002e-05
7	707	0	0.000123292	0.000271545	0.00024964	0.000262501	0.000269006	0.000278392	0.000276068	0.000267741	0.000264951	0.00025867	0.00025239	0.000248927	0.000243163	0.000237816	0.000236141	0.000228089	0.000224479	0.000219374	0.000214442	0.000209141	0.000202104	0.000195124	0.000190107	0.000184397	0.00017813	0.000171747	0.000164396	0.000158859	0.000150611	0.000144203	0.000137722	0.000132399	0.000128645	0.000123217	0.000121098	0.000121405	0.000120594	0.000119767	0.000121871	0.00012098	0.000120032	0.000120325	0.000115999	0.000119116	0.000116901	0.000117038	0.000121134
8	708	0	8.43506e-05	8.06307e-05	8.84758e-05	8.4628e-05	8.65402e-05	8.50474e-05	8.08511e-05	7.90868e-05	7.48338e-05	8.19096e-05	7.70141e-05	8.20358e-05	8.28647e-05	8.03912e-05	7.65926e-05	7.50482e-05	7.46608e-05	7.37652e-05	7.4152e-05	7.58275e-05	7.23122e-05	7.3848e-05	7.43715e-05	7.30444e-05	7.45074e-05	7.43715e-05	7.18991e-05	7.05721e-05	7.25632e-05	7.17048e-05	7.16173e-05	7.1231e-05	6.94255e-05	6.97139e-05	7.10503e-05	6.85781e-05	6.84065e-05	7.0208e-05	6.81137e-05	6.8869e-05	6.95879e-05	6.71961e-05	6.69004e-05	6.8317e-05	6.68206e-05	6.63687e-05	6.6668e-05
9	715	0	0.000130799	7.98129e-05	0.000101163	0.00012131	0.000119494	0.000115243	0.000112491	0.000110681	0.000109264	0.000110134	0.000108716	0.000107611	0.000106982	0.000107498	0.000105526	0.000106148	0.000105299	0.000104905	0.000105638	0.000104576	0.000103835	0.000103665	0.000103441	0.000102775	0.000104355	0.000103522	0.000102775	0.000103304	0.000104355	0.00010485	0.000107222	0.000107736	0.000112128	0.000113092	0.000111117	0.000110896	0.000107167	0.00010564	0.000108292	0.000111755	0.000114491	0.000116505	0.000118737	0.000119497	0.000121846	0.000123922	0.000125446
10	Geobacillus stearothermophilis esterase	0	6.63262e-05	4.83958e-05	0.000112316	0.000110196	8.19689e-05	0.000102072	9.56839e-05	8.98254e-05	9.72593e-05	9.57634e-05	9.59645e-05	9.59645e-05	9.66457e-05	9.74694e-05	9.81498e-05	9.79643e-05	0.000109863	0.000112216	0.00011868	9.91461e-05	0.000100097	0.000100191	0.000102585	0.000103592	0.000103234	0.000105066	0.000106792	0.0001096	0.000108878	0.000111211	0.00011193	0.000113979	0.000115211	0.000116494	0.000117205	0.000121366	0.000121639	0.000121899	0.000123668	0.000125936	0.000125618	0.000127657	0.000126637	0.000128342	0.000130705	0.00013102	0.000129659
11	Bacillus subilis esterase	0	8.46428e-05	3.00985e-05	8.1318e-05	0.000117929	0.000111932	0.000115083	0.000117678	0.000120357	0.000121483	0.000119258	0.000122408	0.000121714	0.000118623	0.000115683	0.000116428	0.000115904	0.000116033	0.000114206	0.000109092	0.000109079	0.00011028	0.000107917	0.000108487	0.000107917	0.000108292	0.000107891	0.000106514	0.000106708	0.000106312	0.000107104	0.000106109	0.000114622	0.000116009	0.000115414	0.000115613	0.000114028	0.000114432	0.000115611	0.000115414	0.000114226	0.000115426	0.000114822	0.000114432	0.00011562	0.000114828	0.000114822	0.000115834
12	Aspergilis oryzae lipase	0	9.01181e-05	9.2944e-05	8.51248e-05	0.000184109	0.000191147	0.000195305	0.000186571	0.000183327	0.000176957	0.000175994	0.000173295	0.000166644	0.000167744	0.000165294	0.000169256	0.000167058	0.000167058	0.000163405	0.000162301	0.000163599	0.000162651	0.000164007	0.000161873	0.000162333	0.000162986	0.000162958	0.000161331	0.000160915	0.000165282	0.000164623	0.000164971	0.000166985	0.000167676	0.000168025	0.000168014	0.000165271	0.000166985	0.000166642	0.0001663	0.0001663	0.000165958	0.000166986	0.000165958	0.000165961	0.000166644	0.0001663	0.00016665
13	Candita antarctica lipase A	0	1.20417e-05	1.95935e-05	2.39758e-05	3.45368e-05	3.22701e-05	3.1173e-05	3.56336e-05	2.38447e-05	2.66687e-05	2.15554e-05	1.80181e-05	1.23502e-05	1.27438e-05	1.59702e-05	1.9054e-05	1.67558e-05	1.62476e-05	1.5852e-05	1.64632e-05	1.4946e-05	1.69141e-05	1.54311e-05	1.75151e-05	1.4946e-05	1.5683e-05	1.51853e-05	1.68538e-05	1.52163e-05	1.69973e-05	1.8174e-05	1.53394e-05	1.5683e-05	1.80702e-05	1.69789e-05	1.84522e-05	1.59408e-05	1.78871e-05	1.77904e-05	1.72445e-05	1.66055e-05	1.77904e-05	1.71305e-05	1.85581e-05	1.82643e-05	1.71305e-05	1.72445e-05	1.77816e-05
14	Candita antarctica lipase B	0	9.53253e-05	8.89996e-05	8.00688e-05	7.51859e-05	6.96082e-05	6.48563e-05	6.09256e-05	5.86778e-05	5.67341e-05	5.37634e-05	5.2917e-05	5.13611e-05	4.98871e-05	4.95766e-05	4.91527e-05	4.83699e-05	4.80055e-05	4.71954e-05	4.61916e-05	4.60846e-05	4.57003e-05	4.436e-05	4.57003e-05	4.53231e-05	4.53231e-05	4.53231e-05	4.45909e-05	4.45768e-05	4.38911e-05	4.42326e-05	4.45768e-05	4.42361e-05	4.45821e-05	4.39053e-05	4.38964e-05	4.42326e-05	4.35576e-05	4.38964e-05	4.38964e-05	4.32325e-05	4.25251e-05	3.67533e-05	3.64836e-05	3.54771e-05	3.54771e-05	3.63997e-05	3.61252e-05
15	Rhizopus oryzae esterase	0	6.59529e-05	7.80463e-05	0.000124374	0.000148039	0.00019396	0.00019794	0.000196856	0.000195281	0.000194209	0.000197249	0.000196558	0.000196753	0.000196119	0.000196877	0.000196861	0.000195052	0.000194398	0.000194024	0.000193637	0.000193249	0.00019337	0.000191822	0.000193102	0.000191172	0.000190647	0.00018831	0.000187921	0.000186893	0.000188049	0.00018727	0.000186623	0.000184809	0.000184942	0.000185078	0.00018403	0.000183383	0.000182863	0.000180662	0.000181187	0.00018092	0.000180794	0.000178848	0.000179235	0.000177681	0.000177423	0.000176902	0.000176255
16	Aspergilis oryzae phospholipase	0	4.56763e-05	2.64207e-05	2.03779e-05	0.000105921	0.000326199	0.000341475	0.000283312	0.000286452	0.000256056	0.000274783	0.000262144	0.000255913	0.000251783	0.000255655	0.000241867	0.000243744	0.000261934	0.000250351	0.000248277	0.000234802	0.00023915	0.000235362	0.000239441	0.000238844	0.00023197	0.000236141	0.000235778	0.000234627	0.000238897	0.000237354	0.000232395	0.0002412	0.000238586	0.000237563	0.000239142	0.000239452	0.000237013	0.000242049	0.000234667	0.000239313	0.000238408	0.00024056	0.000236654	0.000238528	0.000252405	0.000238988	0.000236395
17	Pseudomonas sp. lipoprotein lipase	0	0.000138179	9.95154e-05	0.000111376	9.43102e-05	6.32633e-05	6.976e-05	7.35502e-05	6.59303e-05	5.33066e-05	3.69807e-05	5.23032e-05	5.73852e-05	6.21647e-05	5.34387e-05	5.23032e-05	5.48287e-05	4.71089e-05	5.03485e-05	4.82189e-05	5.20207e-05	5.22372e-05	5.30146e-05	5.212e-05	5.41121e-05	4.92658e-05	5.39555e-05	5.75815e-05	5.64932e-05	5.69409e-05	5.7336e-05	5.832e-05	6.10913e-05	6.06832e-05	5.91249e-05	5.95054e-05	6.48551e-05	6.2176e-05	6.34488e-05	6.3434e-05	6.23875e-05	6.71401e-05	6.86695e-05	6.84992e-05	7.14858e-05	7.05388e-05	6.8247e-05	7.0441e-05
18	Bovine pancreas phospholipase	0	0.000175105	0.000166531	0.000139718	0.000134392	0.0001323	0.000133654	0.000133901	0.000133266	0.000132638	0.000131932	0.000135519	0.000129139	0.000133331	0.000135581	0.000133463	0.000138241	0.000135086	0.000140082	0.000139571	0.000140113	0.000141894	0.000140267	0.000137502	0.000140475	0.000143011	0.000141014	0.000137199	0.000139571	0.0001385	0.000138819	0.000138531	0.000138207	0.000137062	0.000136588	0.000135618	0.000136143	0.000136886	0.000136983	0.000135006	0.000134958	0.000133389	0.000135581	0.000133246	0.000133378	0.000133641	0.000134254	0.000133641
	lysate	0	0.000203646	0.000184706	0.000205159	0.000200682	0.000204301	0.000204584	0.000202308	0.000200468	0.000197488	0.000197409	0.000195286	0.000194603	0.000193811	0.000192445	0.000193026	0.000193093	0.00019417	0.000193351	0.000193093	0.000191268	0.00019356	0.000191911	0.000191872	0.000191872	0.000191028	0.000190347	0.000191884	0.000190795	0.000189299	0.000189498	0.000188452	0.000189085	0.000188519	0.000190422	0.000187749	0.000189382	0.000189236	0.000187938	0.000188489	0.000186434	0.000185087	0.000182947	0.000178664	0.000178843	0.000179577	0.000182116	0.000182976
	MasterMix+BHET	0	3.33921e-05	0.000183859	4.97187e-05	7.52568e-05	3.48148e-05	4.80039e-05	6.86638e-05	4.50856e-05	4.80838e-05	5.17851e-05	4.53456e-05	4.03401e-05	4.54595e-05	4.44024e-05	3.72847e-05	3.77755e-05	3.70083e-05	4.21679e-05	3.87506e-05	3.35981e-05	3.50235e-05	3.4112e-05	3.23138e-05	3.52444e-05	3.31045e-05	3.30405e-05	3.39046e-05	3.16446e-05	3.03707e-05	3.16223e-05	2.94987e-05	3.20214e-05	3.28812e-05	2.98316e-05	3.25819e-05	3.1406e-05	2.89354e-05	3.12985e-05	3.03629e-05	2.96709e-05	2.92908e-05	3.15777e-05	3.15777e-05	3.22555e-05	2.89354e-05	2.98684e-05	2.91916e-05
	MaserMix No BHET	0	2.8911e-05	4.52348e-05	2.75363e-05	3.1992e-05	3.27905e-05	3.54152e-05	4.43653e-05	1.69141e-05	1.74344e-05	3.10975e-05	3.88354e-05	3.94004e-05	3.52711e-05	3.55103e-05	3.75006e-05	4.20189e-05	4.26741e-05	4.28098e-05	4.29579e-05	4.44765e-05	4.6979e-05	4.67398e-05	4.82043e-05	5.00565e-05	5.11899e-05	5.32139e-05	5.32139e-05	5.30442e-05	5.52843e-05	5.49857e-05	5.62596e-05	5.87939e-05	5.87939e-05	5.90838e-05	5.94145e-05	5.95831e-05	5.97066e-05	5.93115e-05	6.11233e-05	6.23045e-05	6.17815e-05	6.13576e-05	6.29652e-05	6.20082e-05	6.26983e-05	6.52251e-05	6.30921e-05
Average
	Hours	0	0.25	0.5	0.75	1	1.25	1.5	1.75	2	2.25	2.5	2.75	3	3.25	3.5	3.75	4	4.25	4.5	4.75	5	5.25	5.5	5.75	6	6.25	6.5	6.75	7	7.25	7.5	7.75	8	8.25	8.5	8.75	9	9.25	9.5	9.75	10	10.25	10.5	10.75	11	11.25	11.5	11.75
1	T. fusca cutinase	0	0.000187229	0.000149724	0.000108039	0.000156744	0.000134972	0.000169268	0.000161767	0.000187306	0.000164638	0.000189521	0.000168335	0.000189001	0.0001647	0.000174144	0.000147325	0.000168633	0.000146075	0.000168332	0.000144945	0.000166066	0.000146477	0.000172664	0.000148492	0.000174246	0.000144568	0.000170714	0.000149456	0.00017054	0.000148145	0.000169368	0.000147458	0.000168029	0.000147728	0.000167803	0.000146341	0.000168414	0.000145463	0.000166894	0.000146046	0.00016714	0.000139027	0.000166821	0.000143599	0.000166134	0.000144943	0.00016777	0.000145231
2	I. sakiensis PETase	0	0.000144051	0.000122514	0.000116168	7.71674e-05	5.72785e-05	6.66489e-05	7.04626e-05	7.12536e-05	7.38737e-05	6.81981e-05	7.45415e-05	6.7067e-05	7.29471e-05	6.73428e-05	6.94355e-05	6.36749e-05	6.87172e-05	6.23351e-05	6.63078e-05	6.03923e-05	6.42727e-05	6.06892e-05	6.37855e-05	6.06464e-05	6.3017e-05	6.01863e-05	6.12199e-05	5.99013e-05	6.10324e-05	5.95507e-05	5.96427e-05	5.98993e-05	5.96465e-05	5.97637e-05	5.91253e-05	6.05835e-05	5.87482e-05	6.00527e-05	5.86838e-05	6.05572e-05	5.89509e-05	6.09629e-05	5.87439e-05	6.0816e-05	5.80656e-05	6.16657e-05	5.79207e-05
3	501	0	0.000171593	0.000102129	0.0001081	0.000230367	0.00011474	0.000238619	0.000136054	0.000246319	0.000142995	0.000253113	0.000148621	0.000257419	0.000156582	0.000255296	0.000157961	0.00024984	0.000158492	0.000247988	0.000161633	0.000246368	0.000163133	0.00024654	0.000164547	0.000246045	0.000164949	0.000243268	0.000162522	0.000248099	0.00016836	0.000247009	0.000163927	0.0002426	0.000170266	0.000246222	0.000166614	0.00024705	0.000158417	0.000283449	0.000168791	0.00028474	0.000163122	0.000286566	0.000166884	0.000282861	0.000169522	0.000287974	0.000171588
4	702	0	0.00014458	9.50862e-05	0.000102718	8.90564e-05	9.36666e-05	6.06833e-05	5.14262e-05	5.95082e-05	4.91544e-05	4.9047e-05	4.70142e-05	4.92489e-05	4.83983e-05	5.26098e-05	5.09531e-05	5.44235e-05	5.28635e-05	5.5026e-05	5.31203e-05	5.59494e-05	5.37816e-05	5.81586e-05	5.5018e-05	5.70231e-05	5.59121e-05	5.85904e-05	5.53961e-05	5.89257e-05	5.73586e-05	5.92443e-05	5.62888e-05	5.94075e-05	5.70811e-05	5.96628e-05	5.73745e-05	5.91632e-05	5.65092e-05	5.91199e-05	5.62523e-05	5.90542e-05	5.32459e-05	4.95452e-05	4.08633e-05	3.95187e-05	3.46333e-05	3.41004e-05	3.00448e-05
5	703	0	0.000109245	0.000100749	0.000128908	0.000135129	0.000120131	0.000135121	0.000127082	0.000136196	0.000131646	0.000134949	0.000142812	0.000137875	0.000130975	0.000139284	0.000133928	0.000142302	0.000138245	0.000140955	0.000138194	0.000143321	0.000140789	0.000144238	0.000138738	0.000144091	0.000141309	0.000145362	0.000141235	0.000144382	0.000141195	0.000145303	0.000140847	0.000143953	0.000139815	0.000142625	0.000139071	0.000143446	0.000142318	0.000149708	0.000149207	0.000156385	0.000155548	0.000162631	0.000157726	0.000162748	0.000156669	0.000161822	0.000155595
6	705	0	3.62913e-05	4.47051e-05	8.99155e-05	0.000148401	9.07644e-05	0.000160792	0.000105825	0.000173161	0.000113944	0.000178562	0.000113987	0.000184379	0.000117288	0.000183562	0.000113551	0.00017975	0.000111283	0.00017904	0.000109541	0.000176772	0.000110071	0.000176628	0.000108606	0.000176667	0.000105499	0.000173347	0.000103843	0.000176934	0.000104857	0.000176029	0.000101751	0.000171544	0.000106604	0.000175246	0.000102975	0.000174529	0.000103564	0.000174522	0.000104396	0.000175891	0.000101692	0.000177677	0.000102394	0.000174904	0.000105302	0.000179539	0.000105826
7	707	0	0.000236736	0.000369978	0.000333313	0.000313756	0.000298079	0.000293421	0.000287897	0.000282915	0.000281791	0.000278098	0.000272956	0.00027247	0.000269719	0.000264906	0.000258938	0.000240666	0.000223378	0.000213644	0.000207911	0.000202074	0.000196181	0.000188719	0.000187544	0.000184275	0.000180038	0.000177254	0.000172687	0.000170813	0.000165952	0.00016316	0.000159067	0.000156673	0.000153747	0.00015194	0.000149987	0.00014965	0.000148981	0.000149566	0.000149379	0.000148115	0.00014765	0.000147356	0.0001465	0.000147531	0.000146252	0.00014583	0.000149462
8	708	0	0.00291904	0.00270436	0.0028585	0.00290049	0.00250724	0.00301933	0.00253786	0.00257336	0.00258418	0.0025939	0.00260061	0.00259776	0.00259996	0.00260973	0.00258297	0.00259675	0.00255788	0.00254119	0.00250846	0.00250464	0.00248296	0.00250747	0.00246349	0.00247628	0.00246661	0.00244082	0.00245156	0.00243318	0.00243459	0.00240002	0.00240186	0.00236862	0.00238238	0.00238195	0.00235571	0.0023334	0.00232433	0.00230633	0.00229926	0.00231025	0.00227777	0.0022756	0.00224132	0.00226896	0.00225307	0.00224545	0.00222461
9	715	0	0.00109584	0.000945022	0.000940136	0.00100451	0.001002	0.00101123	0.00101383	0.00101127	0.00100442	0.00102383	0.00101298	0.00102461	0.00101077	0.00101493	0.00104353	0.00103676	0.000995695	0.000975235	0.000998028	0.00097627	0.000986921	0.000971562	0.000984343	0.000968526	0.000968041	0.000965553	0.000967514	0.000963807	0.000949541	0.000958881	0.000949806	0.000947259	0.000936822	0.00107286	0.00107597	0.00107446	0.00106342	0.00106782	0.00106657	0.00105378	0.00105694	0.00104993	0.00105387	0.00104681	0.00104367	0.00103792	0.00105541
10	Geobacillus stearothermophilis esterase	0	0.000153183	0.000294937	0.000318084	0.00021532	0.000272578	0.000300884	0.000297886	0.000296719	0.000305168	0.000304287	0.000305848	0.000305875	0.00029683	0.000292783	0.000288613	0.000285503	0.000290545	0.000293666	0.000297807	0.000288145	0.00029106	0.000291197	0.000293332	0.000294492	0.00029543	0.000298406	0.000299159	0.000302416	0.000301935	0.000305075	0.000306053	0.00030854	0.000302817	0.000305522	0.000305483	0.000309317	0.0003099	0.000311327	0.000312036	0.000314922	0.000314733	0.000317212	0.000316592	0.000316977	0.000319893	0.00031977	0.000320136
11	Bacillus subilis esterase	0	0.00013584	0.000253701	0.00029237	0.000313881	0.000304901	0.000300718	0.000302681	0.00030326	0.000304294	0.000303142	0.000305453	0.000305979	0.000307131	0.000308937	0.000314591	0.000318958	0.000318274	0.000310717	0.000307164	0.000309557	0.000309206	0.000309368	0.000309215	0.000311502	0.000312197	0.000312379	0.000313525	0.000311838	0.000311553	0.000311303	0.000311059	0.00031474	0.000315842	0.000315742	0.000315808	0.000314282	0.000316622	0.000316705	0.000317585	0.000317338	0.000316239	0.000318386	0.000318468	0.000317965	0.000320074	0.000319444	0.000319851
12	Aspergilis oryzae lipase	0	0.000322447	0.000182575	0.000203719	0.000266831	0.000270457	0.000267237	0.000261056	0.000249343	0.00023952	0.000230162	0.000223216	0.000209964	0.000207381	0.000199032	0.000194296	0.000192016	0.000181268	0.000175384	0.000169499	0.000165565	0.000162939	0.00017013	0.000170459	0.000176649	0.000182196	0.000187375	0.000187633	0.000187283	0.000192566	0.000195098	0.000198028	0.000204318	0.000209725	0.000214807	0.000222003	0.000227029	0.000233358	0.000239145	0.000246576	0.00025185	0.000299805	0.000304626	0.000307461	0.000311192	0.000315373	0.000317816	0.000320733
13	Candita antarctica lipase A	0	2.83619e-05	2.5967e-05	3.31257e-05	3.84783e-05	3.53458e-05	3.28003e-05	4.18832e-05	5.0497e-05	6.38379e-05	6.8127e-05	8.04183e-05	8.18145e-05	7.87818e-05	8.36719e-05	7.47855e-05	7.65908e-05	8.01332e-05	7.23896e-05	7.18125e-05	6.76334e-05	6.63877e-05	6.43739e-05	6.21523e-05	5.8073e-05	5.48042e-05	5.25895e-05	5.10624e-05	4.95753e-05	4.83048e-05	4.83759e-05	4.37954e-05	4.19857e-05	4.30557e-05	4.06957e-05	3.80617e-05	3.60981e-05	3.59866e-05	3.27432e-05	3.37029e-05	3.04084e-05	3.04215e-05	2.7645e-05	2.7372e-05	2.67277e-05	2.46529e-05	2.51271e-05	2.41341e-05
14	Candita antarctica lipase B	0	9.50788e-05	8.15615e-05	7.37861e-05	6.58479e-05	5.8454e-05	5.34935e-05	4.98926e-05	4.78578e-05	4.57463e-05	4.46467e-05	4.26032e-05	4.19462e-05	4.13197e-05	4.1223e-05	3.9996e-05	3.84755e-05	3.92499e-05	3.79512e-05	3.83545e-05	3.925e-05	3.86638e-05	3.85896e-05	3.96515e-05	3.96923e-05	4.06393e-05	4.1153e-05	4.1497e-05	4.16859e-05	4.33943e-05	4.37017e-05	4.5435e-05	4.59784e-05	4.71173e-05	4.66412e-05	4.78044e-05	4.84248e-05	4.86736e-05	4.95755e-05	5.02862e-05	5.02966e-05	5.03836e-05	4.87473e-05	4.87341e-05	4.87749e-05	4.97011e-05	5.04462e-05	5.09265e-05
15	Rhizopus oryzae esterase	0	9.32797e-05	0.00019653	0.000210211	0.00023084	0.000253142	0.000244587	0.000246217	0.000207407	0.000216346	0.000216514	0.0002221	0.000222296	0.00022507	0.000226226	0.000225761	0.000225635	0.000229001	0.000225833	0.000229335	0.000229601	0.000231093	0.000228445	0.000228568	0.000231115	0.000229624	0.000232822	0.000233179	0.000233128	0.000237448	0.000234022	0.000238599	0.000232399	0.000238693	0.000235259	0.000237951	0.000237976	0.000242151	0.000240383	0.000245876	0.000243342	0.000247056	0.000243684	0.000246005	0.000246723	0.000251087	0.000246181	0.000258318
16	Aspergilis oryzae phospholipase	0	7.59853e-05	0.000135063	8.4129e-05	0.000114923	0.000225913	0.000212833	0.000176854	0.00018077	0.000165403	0.000175296	0.000168015	0.000166902	0.000165848	0.000168319	0.000161566	0.00016426	0.000171119	0.000167697	0.000165119	0.000159757	0.000160907	0.000160892	0.000160947	0.00016263	0.000157305	0.000160953	0.000162538	0.000161125	0.000162999	0.000162055	0.000160352	0.000164175	0.000164782	0.000161644	0.000163701	0.000160537	0.000162592	0.00016418	0.000160064	0.00016254	0.000161425	0.000162888	0.000160264	0.00016218	0.000168073	0.000161693	0.000159878
17	Pseudomonas sp. lipoprotein lipase	0	0.000185289	0.000154668	0.000145182	0.000127995	0.000105972	0.000122007	0.000121323	0.000128384	0.000125382	0.000122136	0.000129456	0.000135824	0.000139265	0.000135527	0.000136752	0.000138225	0.000136248	0.000136293	0.000136074	0.000135215	0.000129603	0.000130186	0.000130592	0.000131263	0.000130806	0.000133434	0.000137032	0.000135841	0.000137651	0.000137712	0.000138757	0.000140058	0.000140567	0.000140518	0.000142209	0.000144085	0.00014401	0.000145627	0.000146747	0.000145756	0.000148641	0.00014961	0.000150034	0.00015125	0.000152082	0.000150645	0.000151822
18	Bovine pancreas phospholipase	0	0.000271596	0.000254565	0.000186421	0.000164802	0.000161082	0.000164043	0.000158508	0.000159383	0.000159881	0.000160663	0.000153163	0.00014909	0.00014685	0.000156074	0.000152504	0.000151453	0.000149819	0.000150204	0.00014982	0.000147814	0.000147406	0.000145643	0.000142751	0.000145369	0.000145174	0.000143438	0.000141293	0.000142612	0.000141114	0.000141262	0.000140584	0.000140275	0.000137718	0.000138713	0.000138248	0.000138354	0.000138112	0.000137695	0.000134882	0.000134811	0.000132612	0.000137171	0.00013369	0.000133642	0.00013351	0.000133031	0.000132113
lysate	lysate	0	0.000249607	0.000330901	0.000333149	0.000322905	0.000322428	0.00031981	0.000316911	0.000314149	0.000308838	0.000285542	0.000279003	0.000275132	0.00027205	0.00026894	0.000267553	0.00026583	0.000265715	0.000264513	0.000263617	0.000262265	0.000262952	0.000261842	0.000261518	0.0002617	0.0002613	0.000260764	0.000261732	0.000260685	0.000259724	0.000259745	0.000259081	0.000258311	0.000257282	0.000256626	0.000254248	0.000253442	0.000251845	0.00024948	0.00024966	0.00024763	0.000246975	0.000245159	0.000242934	0.000242863	0.000243943	0.000245152	0.000245689
MasterMix+BHET	MasterMix+BHET	0	6.94851e-05	0.000138137	0.00014798	0.000166438	0.000135811	0.000124472	0.000131938	0.000137913	0.000136049	0.000143133	0.000140506	0.000138862	0.000141139	0.00014219	0.000137928	0.000140084	0.00014196	0.000145416	0.000143175	0.000142742	0.000142711	0.000142453	0.000142551	0.000143565	0.000142691	0.000142319	0.000142277	0.00014007	0.000136013	0.00013209	0.000127841	0.000126001	0.000123061	0.000119046	0.000116878	0.00011547	0.000111667	0.000111764	0.000108963	0.000108091	0.000106841	0.000107237	0.000106291	0.000106637	0.000103678	0.000104477	0.000102553
MaserMix No BHET	MaserMix No BHET	0	4.44671e-05	0.000100002	0.000106082	0.000114032	9.29976e-05	8.01812e-05	9.56802e-05	8.71272e-05	9.47332e-05	0.000106037	0.000113444	0.000116231	0.000111226	0.000113502	0.000113132	0.000115998	0.000118244	0.00011716	0.000114422	0.000112088	0.000115007	0.000114832	0.000118087	0.000120703	0.000122284	0.000124872	0.000125103	0.000127173	0.000128953	0.000128882	0.000129598	0.000131416	0.000130986	0.000131339	0.000131279	0.000130579	0.000131252	0.000131014	0.000131795	0.000133136	0.000132163	0.00013225	0.000132478	0.000132137	0.000132847	0.000134368	0.00013261
[truncated: 49 more columns]

## Sheet: Specific Activity
Enzyme Number	Enzyme Name	(mM ester cleaved)*(min-1)	(µM ester cleaved)*(min-1)		Enzyme Number	Enzyme Name	(µmol ester cleaved) * (min-1) * (µmol enzyme-1)	StDev
1	T. fusca cutinase	0.0212	21.2		1	T. fusca cutinase	2.12	0.000120044
2	I. sakiensis PETase	0.0086	8.6		2	I. sakiensis PETase	0.86	0.000129075
3	501	0.0159	15.9		3	501	1.59	0.000120111
4	702	0.0217	21.7		4	702	2.17	0.000114131
5	703	0.0218	21.8		5	703	2.18	0.000143231
6	705	0.0092	9.2		6	705	0.92	9.99061e-05
7	707	0.0081	8.1		7	707	0.81	0.000370348
8	708	0.008	8		8	708	0.8	0.00317611
9	715	0.0246	24.6		9	715	2.46	0.0010446
10	Geobacillus stearothermophilis esterase	0.0177	17.7		10	Geobacillus stearothermophilis esterase	1.77	0.000353427
11	Bacillus subilis esterase	0.0177	17.7		11	Bacillus subilis esterase	1.77	0.000324856
12	Aspergilis oryzae lipase	0.0054	5.4		12	Aspergilis oryzae lipase	0.54	0.000226354
13	Candita antarctica lipase A	0.0051	5.1		13	Candita antarctica lipase A	0.51	3.68063e-05
14	Candita antarctica lipase B	0.0164	16.4		14	Candita antarctica lipase B	1.64	8.19846e-05
15	Rhizopus oryzae esterase	-0.0034	-3.4		15	Rhizopus oryzae esterase	-0.34	0.000233568
16	Aspergilis oryzae phospholipase	0.0029	16.6		16	Aspergilis oryzae phospholipase	1.66	9.34766e-05
17	Pseudomonas sp. lipoprotein lipase	0.0166	16.6		17	Pseudomonas sp. lipoprotein lipase	1.66	0.000161313
18	Bovine pancreas phospholipase	0.0081	8.1		18	Bovine pancreas phospholipase	0.81	0.000207135
	lysate	0.0048	4.8			lysate	0.48	0.000370166
	MasterMix+BHET	0.002	2			MasterMix+BHET	0.2	0.000164422
	MasterMix No BHET	0.009	9
Time (min)	1	2	3	4	5	6	7	8	9	11	12	13	14	15	16	17	18	lysate	MasterMix+BHET	MaserMix No BHET
0	0	0	0	0	0	0	0	0	0	0	0	0	0	0	0	0	0	0	0	0
14.9998	0.140764	0.725855	-0.0899377	0.182411	0.163759	0.16166	0.108735	-0.2539	-0.0840798	0.443102	0.0398978	0.105821	0.177981	1.10956	-0.0243059	0.445433	-0.00314753	0.16813	-1.29424e-16	-0.0514387
29.9998	0.660893	0.972498	0.106185	0.693126	0.692048	0.390002	0.288465	-0.036692	0.490111	0.840972	0.206775	0.254687	0.55583	1.16721	0.0562766	0.971216	0.202316	0.306592	0.164254	0.201995
44.9998	0.803494	1.02595	0.179409	0.857526	0.850502	0.47312	0.31076	0.0217412	0.644573	0.981241	0.23487	0.290913	0.711195	1.19501	0.0955915	0.995376	0.271212	0.341827	0.126134	0.21817

## Sheet: TTON
Enzyme Number	Enzyme Name
1	T. fusca cutinase	15.8191		BHET
2	I. sakiensis PETase	17.5723		0.001	mol	0.0002	L	2e-07	mol	0.2	µmol	10	µmol BHET per µmol enzyme
3	501	10.7897			L
4	702	16.4461
5	703	15.6726		Enzyme
6	705	10.8719		0.0001	mol	0.0002	L	2e-08	mol
7	707	8.52601			L			0.02	µmol
8	708	10.241
9	715	14.1751
10	Geobacillus stearothermophilis esterase	20.13
11	Bacillus subilis esterase	15.2341
12	Aspergilis oryzae lipase	5.99545
13	Candita antarctica lipase A	5.46387
14	Candita antarctica lipase B	11.2577
15	Rhizopus oryzae esterase	-0.932309
16	Aspergilis oryzae phospholipase	3.99415
17	Pseudomonas sp. lipoprotein lipase	13.1552
18	Bovine pancreas phospholipase	5.88413
	lysate	6.79341
	MasterMix+BHET	4.54147
	MasterMix No BHET	4.33872
11
12
703	705
0	0
0.163759	0.16166
0.692048	0.390002
0.850502	0.47312
