# Supplementary material for: A flexible kinetic assay efficiently sorts prospective biocatalysts for PET plastic subunit hydrolysis
Source: RSC Adv. 2022 Mar 14;12(13):8119–30. doi: 10.1039/d2ra00612j (PMC8982334; doi:10.1039/d2ra00612j)
Supplement: RA-012-D2RA00612J-s003 [file RA-012-D2RA00612J-s003.xlsx]

## Sheet: Abs550
Experimental Replicate 1
	avg. time [s]		0	899.99	1799.99	2699.99	3599.99	4499.99	5399.99	6299.99	7199.99	8099.99	8999.99	9899.99	10800	11700	12600	13500	14400	15300	16200	17100	18000	18900	19800	20700	21600	22500	23400	24300	25200	26100	27000	27900	28800	29700	30600	31500	32400	33300	34200	35100	36000	36900	37800	38700	39600	40500	41400
	Time (min)	0	14.9998	29.9998	44.9998	59.9998	74.9998	89.9998	105	120	135	150	165	180	195	210	225	240	255	270	285	300	315	330	345	360	375	390	405	420	435	450	465	480	495	510	525	540	555	570	585	600	615	630	645	660	675	690	705
1	T. fusca cutinase	1.74967	1.462	1.123	1.024	0.989	0.961	0.956	0.945	0.935	0.93	0.927	0.921	0.921	0.914	0.91	0.905	0.902	0.898	0.894	0.89	0.888	0.883	0.879	0.876	0.873	0.869	0.866	0.863	0.86	0.857	0.854	0.851	0.848	0.845	0.842	0.839	0.837	0.834	0.832	0.829	0.827	0.825	0.822	0.821	0.818	0.816	0.814	0.812
1	T. fusca cutinase	1.74967	1.489	1.128	1.016	0.98	0.963	0.956	0.949	0.943	0.936	0.931	0.926	0.92	0.914	0.91	0.905	0.899	0.895	0.891	0.886	0.883	0.878	0.875	0.871	0.867	0.864	0.86	0.856	0.852	0.85	0.846	0.843	0.84	0.837	0.835	0.832	0.829	0.827	0.824	0.821	0.82	0.817	0.815	0.813	0.81	0.809	0.806	0.805
1	T. fusca cutinase	1.74967	1.432	1.107	1	0.963	0.943	0.931	0.92	0.912	0.904	0.899	0.89	0.887	0.882	0.877	0.873	0.869	0.864	0.859	0.854	0.85	0.845	0.841	0.836	0.833	0.829	0.825	0.821	0.817	0.814	0.81	0.807	0.803	0.801	0.798	0.795	0.792	0.789	0.787	0.784	0.782	0.78	0.777	0.775	0.773	0.771	0.769	0.767
2	I. sakiensis PETase	1.74967	1.294	1.058	1.002	0.972	0.968	0.972	0.977	0.984	0.986	0.989	0.994	0.995	1.001	1.006	1.007	1.01	1.015	1.017	1.016	1.021	1.023	1.023	1.024	1.026	1.026	1.026	1.026	1.027	1.026	1.027	1.027	1.027	1.027	1.027	1.027	1.026	1.026	1.025	1.025	1.025	1.024	1.024	1.024	1.022	1.022	1.022	1.021
2	I. sakiensis PETase	1.74967	1.171	0.954	0.928	0.914	0.915	0.92	0.924	0.929	0.935	0.941	0.944	0.951	0.956	0.961	0.965	0.969	0.973	0.976	0.981	0.984	0.986	0.988	0.989	0.991	0.992	0.995	0.996	0.999	1	1.002	1.005	1.006	1.008	1.012	1.012	1.014	1.017	1.018	1.02	1.022	1.024	1.026	1.027	1.028	1.029	1.03	1.031
2	I. sakiensis PETase	1.74967	1.175	0.956	0.931	0.922	0.923	0.929	0.935	0.941	0.948	0.951	0.96	0.965	0.967	0.97	0.975	0.974	0.974	0.974	0.975	0.975	0.973	0.974	0.973	0.973	0.973	0.974	0.974	0.974	0.974	0.974	0.975	0.974	0.975	0.975	0.975	0.975	0.975	0.974	0.975	0.975	0.974	0.974	0.974	0.974	0.974	0.974	0.974
10	Geobacillus stearothermophilis esterase	1.74967	1.128	0.813	0.705	0.666	0.627	0.608	0.594	0.58	0.568	0.557	0.546	0.538	0.531	0.524	0.519	0.514	0.509	0.505	0.501	0.499	0.496	0.493	0.491	0.489	0.487	0.486	0.484	0.484	0.481	0.481	0.48	0.479	0.478	0.478	0.477	0.476	0.476	0.476	0.475	0.475	0.475	0.474	0.474	0.473	0.473	0.473	0.472
10	Geobacillus stearothermophilis esterase	1.74967	1.122	0.821	0.711	0.685	0.634	0.611	0.596	0.583	0.569	0.558	0.549	0.541	0.534	0.528	0.523	0.518	0.514	0.51	0.507	0.504	0.501	0.499	0.497	0.495	0.494	0.492	0.491	0.49	0.489	0.488	0.487	0.486	0.486	0.485	0.484	0.484	0.483	0.482	0.482	0.482	0.481	0.481	0.481	0.48	0.48	0.479	0.479
10	Geobacillus stearothermophilis esterase	1.74967	1.202	0.878	0.75	0.715	0.675	0.654	0.634	0.618	0.606	0.595	0.586	0.577	0.569	0.561	0.555	0.549	0.544	0.539	0.536	0.532	0.529	0.526	0.524	0.521	0.519	0.517	0.515	0.514	0.513	0.511	0.51	0.51	0.509	0.508	0.507	0.506	0.506	0.505	0.505	0.505	0.505	0.504	0.504	0.504	0.504	0.503	0.503
11	Bacillus subilis esterase	1.74967	1.163	0.892	0.943	0.969	0.945	0.939	0.929	0.921	0.917	0.911	0.906	0.904	0.9	0.898	0.895	0.892	0.889	0.887	0.886	0.885	0.884	0.884	0.882	0.882	0.883	0.883	0.882	0.881	0.881	0.88	0.88	0.879	0.879	0.878	0.878	0.878	0.877	0.876	0.876	0.876	0.875	0.875	0.875	0.874	0.874	0.873	0.873
11	Bacillus subilis esterase	1.74967	1.206	0.919	1.011	1.067	1.07	1.085	1.084	1.085	1.081	1.076	1.072	1.068	1.065	1.061	1.059	1.057	1.054	1.052	1.05	1.045	1.041	1.039	1.036	1.033	1.032	1.03	1.028	1.026	1.025	1.022	1.021	1.019	1.018	1.016	1.015	1.015	1.012	1.012	1.011	1.01	1.011	1.012	1.012	1.012	1.012	1.012	1.011
11	Bacillus subilis esterase	1.74967	1.222	0.92	0.941	0.987	1.013	1.011	1.013	1.007	1.006	1.003	0.999	0.994	0.991	0.987	0.985	0.984	0.98	0.978	0.976	0.973	0.969	0.966	0.964	0.962	0.96	0.957	0.956	0.954	0.952	0.951	0.949	0.947	0.945	0.944	0.942	0.94	0.939	0.939	0.938	0.937	0.936	0.935	0.934	0.933	0.933	0.933	0.895
	MasterMix+BHET (G04)	1.74967	1.778	1.56	1.488	1.462	1.455	1.446	1.442	1.44	1.436	1.427	1.424	1.422	1.418	1.415	1.411	1.408	1.405	1.403	1.4	1.397	1.395	1.393	1.39	1.389	1.386	1.384	1.382	1.379	1.377	1.375	1.373	1.37	1.368	1.366	1.364	1.361	1.359	1.356	1.354	1.351	1.349	1.346	1.343	1.341	1.337	1.335	1.332
	MasterMix+BHET (G05)	1.74967	1.695	1.495	1.414	1.379	1.367	1.35	1.341	1.334	1.326	1.32	1.313	1.307	1.302	1.296	1.291	1.286	1.282	1.277	1.273	1.27	1.266	1.262	1.259	1.255	1.252	1.25	1.246	1.243	1.24	1.238	1.235	1.232	1.23	1.226	1.224	1.222	1.219	1.216	1.214	1.212	1.21	1.207	1.205	1.203	1.201	1.198	1.196
	MasterMix+BHET (G06)	1.74967	1.776	1.554	1.473	1.441	1.426	1.411	1.403	1.396	1.388	1.382	1.376	1.37	1.365	1.359	1.355	1.35	1.346	1.341	1.338	1.333	1.329	1.325	1.321	1.317	1.313	1.31	1.306	1.302	1.299	1.297	1.292	1.288	1.285	1.283	1.279	1.276	1.273	1.27	1.268	1.264	1.262	1.26	1.257	1.253	1.252	1.25	1.247
	MaserMix No BHET	1.74967	1.746	1.58	1.511	1.485	1.474	1.469	1.466	1.463	1.463	1.461	1.459	1.458	1.457	1.456	1.455	1.455	1.453	1.453	1.452	1.452	1.452	1.451	1.45	1.45	1.449	1.449	1.448	1.448	1.449	1.448	1.447	1.447	1.447	1.446	1.447	1.446	1.446	1.444	1.445	1.444	1.444	1.444	1.445	1.444	1.443	1.444	1.443
	MaserMix No BHET	1.74967	1.857	1.681	1.607	1.581	1.57	1.565	1.562	1.56	1.559	1.558	1.557	1.555	1.554	1.553	1.552	1.552	1.551	1.55	1.55	1.549	1.549	1.548	1.548	1.547	1.547	1.547	1.546	1.546	1.545	1.544	1.545	1.544	1.544	1.544	1.543	1.544	1.543	1.542	1.542	1.542	1.542	1.542	1.541	1.541	1.541	1.541	1.541
	MaserMix No BHET	1.74967	1.919	1.731	1.658	1.63	1.619	1.613	1.609	1.606	1.604	1.604	1.602	1.6	1.599	1.599	1.598	1.597	1.596	1.595	1.594	1.594	1.593	1.593	1.593	1.592	1.592	1.592	1.591	1.59	1.591	1.59	1.59	1.59	1.59	1.589	1.589	1.589	1.589	1.589	1.588	1.588	1.588	1.589	1.587	1.587	1.587	1.587	1.587
Experimental Replicate 2
	avg. time [s]		0	899.99	1799.99	2699.99	3599.99	4499.99	5399.99	6299.99	7199.99	8099.99	8999.99	9899.99	10800	11700	12600	13500	14400	15300	16200	17100	18000	18900	19800	20700	21600	22500	23400	24300	25200	26100	27000	27900	28800	29700	30600	31500	32400	33300	34200	35100	36000	36900	37800	38700	39600	40500	41400
	Time (min)	0	14.9998	29.9998	44.9998	59.9998	74.9998	89.9998	105	120	135	150	165	180	195	210	225	240	255	270	285	300	315	330	345	360	375	390	405	420	435	450	465	480	495	510	525	540	555	570	585	600	615	630	645	660	675	690	705
1	T. fusca cutinase	1.75857	1.4769	1.1488	1.0371	0.9928	0.9757	0.9656	0.9587	0.9497	0.942	0.9355	0.9284	0.923	0.9169	0.9106	0.9057	0.9007	0.8945	0.8896	0.8836	0.8785	0.8736	0.8683	0.8645	0.8594	0.8546	0.8503	0.8463	0.8415	0.8382	0.8343	0.8301	0.8262	0.8232	0.8193	0.8171	0.8131	0.8102	0.8068	0.8049	0.8019	0.7987	0.797	0.7935	0.7916	0.7884	0.7865	0.7846
1	T. fusca cutinase	1.75857	1.4909	1.1708	1.0381	0.9888	0.9617	0.9486	0.9377	0.9297	0.921	0.9145	0.9064	0.9	0.8919	0.8856	0.8797	0.8727	0.8675	0.8616	0.8566	0.8505	0.8456	0.8403	0.8355	0.8314	0.8276	0.8223	0.8183	0.8145	0.8102	0.8063	0.8031	0.7992	0.7962	0.7933	0.7891	0.7861	0.7832	0.7798	0.7779	0.7749	0.7717	0.769	0.7665	0.7636	0.7614	0.7595	0.7576
1	T. fusca cutinase	1.75857	1.4439	1.1348	1.0051	0.9568	0.9377	0.9246	0.9157	0.9007	0.897	0.8885	0.8794	0.876	0.8689	0.8616	0.8557	0.8487	0.8435	0.8366	0.8316	0.8255	0.8216	0.8153	0.8125	0.8064	0.8026	0.7983	0.7943	0.7905	0.7862	0.7833	0.7791	0.7762	0.7732	0.7693	0.7661	0.7631	0.7602	0.7568	0.7549	0.7519	0.7497	0.747	0.7445	0.7416	0.7394	0.7375	0.7346
2	I. sakiensis PETase	1.75857	1.1659	0.9748	0.9431	0.9288	0.9257	0.9236	0.9237	0.9287	0.93	0.9335	0.9374	0.943	0.9459	0.9466	0.9487	0.9507	0.9505	0.9516	0.9526	0.9525	0.9506	0.9513	0.9505	0.9494	0.9486	0.9463	0.9453	0.9445	0.9442	0.9423	0.9421	0.9422	0.9412	0.9413	0.9411	0.9411	0.9402	0.9398	0.9399	0.9409	0.9407	0.94	0.9405	0.9406	0.9404	0.9405	0.9406
2	I. sakiensis PETase	1.75857	1.1629	0.9678	0.9391	0.9238	0.9177	0.9156	0.9167	0.9207	0.92	0.9255	0.9304	0.936	0.9379	0.9376	0.9407	0.9447	0.9465	0.9476	0.9486	0.9495	0.9516	0.9513	0.9505	0.9524	0.9526	0.9503	0.9503	0.9505	0.9502	0.9503	0.9501	0.9502	0.9502	0.9503	0.9501	0.9501	0.9502	0.9498	0.9499	0.9499	0.9507	0.95	0.9495	0.9496	0.9494	0.9495	0.9496
2	I. sakiensis PETase	1.75857	1.1689	0.9658	0.9281	0.9148	0.9117	0.9106	0.9127	0.9147	0.916	0.9185	0.9164	0.92	0.9199	0.9226	0.9197	0.9207	0.9215	0.9186	0.9186	0.9185	0.9166	0.9163	0.9165	0.9154	0.9146	0.9133	0.9123	0.9115	0.9102	0.9093	0.9091	0.9092	0.9082	0.9073	0.9071	0.9061	0.9062	0.9048	0.9049	0.9049	0.9047	0.904	0.9035	0.9036	0.9034	0.9045	0.9036
10	Geobacillus stearothermophilis esterase	1.75857	1.1099	0.8098	0.6911	0.6388	0.5947	0.5756	0.5617	0.5447	0.529	0.5155	0.5044	0.495	0.4859	0.4776	0.4717	0.4667	0.4615	0.4566	0.4526	0.4495	0.4466	0.4443	0.4425	0.4394	0.4386	0.4363	0.4343	0.4335	0.4322	0.4313	0.4301	0.4292	0.4292	0.4283	0.4271	0.4271	0.4262	0.4258	0.4249	0.4249	0.4237	0.424	0.4235	0.4226	0.4224	0.4225	0.4216
10	Geobacillus stearothermophilis esterase	1.75857	1.1209	0.8258	0.7251	0.6778	0.6227	0.6026	0.5877	0.5747	0.562	0.5505	0.5404	0.532	0.5249	0.5176	0.5117	0.5077	0.5025	0.4986	0.4956	0.4935	0.4906	0.4883	0.4865	0.4844	0.4826	0.4813	0.4803	0.4795	0.4782	0.4773	0.4761	0.4762	0.4752	0.4753	0.4741	0.4741	0.4732	0.4728	0.4729	0.4729	0.4727	0.473	0.4725	0.4716	0.4714	0.4715	0.4716
10	Geobacillus stearothermophilis esterase	1.75857	1.1839	0.8958	0.7491	0.7098	0.6687	0.6446	0.6227	0.6047	0.589	0.5745	0.5624	0.553	0.5449	0.5366	0.5307	0.5247	0.5195	0.5156	0.5116	0.5085	0.5056	0.5023	0.5005	0.4974	0.4966	0.4943	0.4923	0.4915	0.4902	0.4893	0.4881	0.4872	0.4872	0.4863	0.4861	0.4851	0.4842	0.4838	0.4839	0.4839	0.4827	0.483	0.4825	0.4826	0.4824	0.4825	0.4816
11	Bacillus subilis esterase	1.75857	1.1769	0.8938	0.9401	0.9718	0.9567	0.9456	0.9427	0.9397	0.936	0.9325	0.9284	0.926	0.9219	0.9186	0.9157	0.9117	0.9085	0.9056	0.9036	0.9025	0.9006	0.8993	0.8985	0.8974	0.8956	0.8943	0.8933	0.8925	0.8912	0.8903	0.8901	0.8892	0.8892	0.8883	0.8881	0.8871	0.8862	0.8858	0.8849	0.8849	0.8847	0.884	0.8835	0.8836	0.8824	0.8825	0.8826
11	Bacillus subilis esterase	1.75857	1.2039	0.9198	0.9991	1.0278	1.0317	1.0366	1.0327	1.0317	1.028	1.0255	1.0224	1.023	1.0219	1.0216	1.0197	1.0177	1.0145	1.0126	1.0086	1.0045	1.0006	0.9983	0.9955	0.9934	0.9906	0.9883	0.9863	0.9845	0.9822	0.9803	0.9781	0.9772	0.9752	0.9743	0.9721	0.9711	0.9702	0.9688	0.9679	0.9669	0.9657	0.965	0.9645	0.9636	0.9634	0.9625	0.9616
11	Bacillus subilis esterase	1.75857	1.1649	0.8928	0.9751	0.9998	1.0057	1.0046	1.0017	0.9967	0.99	0.9875	0.9824	0.979	0.9759	0.9726	0.9717	0.9687	0.9665	0.9656	0.9636	0.9615	0.9586	0.9563	0.9555	0.9544	0.9546	0.9533	0.9523	0.9515	0.9512	0.9493	0.9481	0.9472	0.9452	0.9443	0.9431	0.9421	0.9412	0.9398	0.9389	0.9379	0.9367	0.936	0.9355	0.9356	0.9344	0.9335	0.9336
	MasterMix+BHET (G04)	1.75857	1.7369	1.5118	1.4531	1.4308	1.4167	1.4086	1.4027	1.3977	1.392	1.3875	1.3834	1.38	1.3769	1.3716	1.3687	1.3647	1.3615	1.3566	1.3556	1.3505	1.3476	1.3443	1.3415	1.3384	1.3356	1.3323	1.3293	1.3265	1.3232	1.3203	1.3181	1.3152	1.3122	1.3103	1.3061	1.3061	1.3022	1.2978	1.2959	1.2929	1.2907	1.288	1.2855	1.2826	1.2794	1.2775	1.2756
	MasterMix+BHET (G05)	1.75857	1.7679	1.5538	1.4771	1.4488	1.4367	1.4276	1.4227	1.4167	1.413	1.4105	1.4074	1.403	1.3989	1.3956	1.3917	1.3877	1.3845	1.3816	1.3776	1.3745	1.3716	1.3673	1.3645	1.3614	1.3586	1.3543	1.3523	1.3485	1.3452	1.3433	1.3401	1.3372	1.3342	1.3323	1.3291	1.3261	1.3232	1.3198	1.3179	1.3159	1.3127	1.31	1.3065	1.3046	1.3014	1.2995	1.2976
	MasterMix+BHET (G06)	1.75857	1.7709	1.5518	1.4721	1.4408	1.4337	1.4206	1.4157	1.4097	1.405	1.4015	1.3974	1.394	1.4089	1.4046	1.4007	1.3977	1.3945	1.3906	1.3876	1.3835	1.3866	1.3773	1.3795	1.3714	1.3686	1.3653	1.3613	1.3585	1.3552	1.3523	1.3501	1.3462	1.3442	1.3413	1.3381	1.3361	1.3322	1.3298	1.3269	1.3239	1.3217	1.319	1.3165	1.3136	1.3114	1.3085	1.3056
	MaserMix No BHET	1.75857	1.7589	1.5818	1.5101	1.4818	1.4717	1.4656	1.4617	1.4597	1.457	1.4555	1.4544	1.454	1.4529	1.4506	1.4507	1.4497	1.4495	1.4486	1.4496	1.4485	1.4476	1.4473	1.4475	1.4454	1.4456	1.4453	1.4433	1.4435	1.4432	1.4413	1.4411	1.4412	1.4402	1.4403	1.4401	1.4391	1.4392	1.4368	1.4389	1.4389	1.4377	1.438	1.4365	1.4366	1.4364	1.4365	1.4366
	MaserMix No BHET	1.75857	1.8819	1.6878	1.6121	1.5828	1.5727	1.5656	1.5607	1.5587	1.558	1.5555	1.5534	1.554	1.5519	1.5506	1.5497	1.5487	1.5475	1.5466	1.5466	1.5465	1.5456	1.5453	1.5445	1.5434	1.5436	1.5423	1.5413	1.5415	1.5402	1.5403	1.5401	1.5392	1.5392	1.5393	1.5391	1.5381	1.5382	1.5378	1.5369	1.5369	1.5367	1.536	1.5355	1.5356	1.5354	1.5355	1.5356
	MaserMix No BHET	1.75857	1.9579	1.7428	1.6641	1.6378	1.6277	1.6236	1.6187	1.6157	1.612	1.6115	1.6104	1.611	1.6089	1.6086	1.6077	1.6067	1.6065	1.6066	1.6056	1.6055	1.6046	1.6043	1.6045	1.6034	1.6036	1.6033	1.6033	1.6025	1.6022	1.6013	1.6021	1.6012	1.6012	1.6013	1.6011	1.6001	1.6002	1.5998	1.5999	1.5999	1.5997	1.6	1.5985	1.5996	1.5984	1.5985	1.5976
[truncated: 51 more columns]

## Sheet: Average ∆Abs550
	Avg ∆Abs
Experimental Replicate 1
	Time (min)	0	14.9998	29.9998	44.9998	59.9998	74.9998	89.9998	105	120	135	150	165	180	195	210	225	240	255	270	285	300	315	330	345	360	375	390	405	420	435	450	465	480	495	510	525	540	555	570	585	600	615	630	645	660	675	690	705
	Hours	0	0.249997	0.499997	0.749997	0.999997	1.25	1.5	1.75	2	2.25	2.5	2.75	3	3.25	3.5	3.75	4	4.25	4.5	4.75	5	5.25	5.5	5.75	6	6.25	6.5	6.75	7	7.25	7.5	7.75	8	8.25	8.5	8.75	9	9.25	9.5	9.75	10	10.25	10.5	10.75	11	11.25	11.5	11.75
1	T. fusca cutinase	0	0.288667	0.630333	0.736333	0.772333	0.794	0.802	0.811667	0.819667	0.826333	0.830667	0.837333	0.840333	0.846333	0.850667	0.855333	0.859667	0.864	0.868333	0.873	0.876	0.881	0.884667	0.888667	0.892	0.895667	0.899333	0.903	0.906667	0.909333	0.913	0.916	0.919333	0.922	0.924667	0.927667	0.930333	0.933	0.935333	0.938333	0.94	0.942333	0.945	0.946667	0.949333	0.951	0.953333	0.955
2	I. sakiensis PETase	0	0.536333	0.760333	0.796	0.813667	0.814333	0.809333	0.804333	0.798333	0.793333	0.789333	0.783667	0.779333	0.775	0.770667	0.767333	0.765333	0.762333	0.760667	0.759	0.756333	0.755667	0.754667	0.754333	0.753	0.752667	0.751333	0.751	0.749667	0.749667	0.748667	0.747333	0.747333	0.746333	0.745	0.745	0.744667	0.743667	0.744	0.743	0.742333	0.742333	0.741667	0.741333	0.741667	0.741333	0.741	0.741
10	Geobacillus stearothermophilis esterase	0	0.599	0.912333	1.02767	1.061	1.10433	1.12533	1.14167	1.156	1.16867	1.17967	1.18933	1.19767	1.205	1.212	1.21733	1.22267	1.22733	1.23167	1.235	1.238	1.241	1.24367	1.24567	1.248	1.24967	1.25133	1.253	1.25367	1.25533	1.25633	1.25733	1.258	1.25867	1.25933	1.26033	1.261	1.26133	1.262	1.26233	1.26233	1.26267	1.26333	1.26333	1.264	1.264	1.26467	1.265
11	Bacillus subilis esterase	0	0.552667	0.839333	0.784667	0.742	0.740333	0.738	0.741	0.745333	0.748333	0.753	0.757333	0.761	0.764333	0.767667	0.77	0.772	0.775333	0.777333	0.779	0.782	0.785	0.786667	0.789	0.790667	0.791333	0.793	0.794333	0.796	0.797	0.798667	0.799667	0.801333	0.802333	0.803667	0.804667	0.805333	0.807	0.807333	0.808	0.808667	0.809	0.809	0.809333	0.81	0.81	0.810333	0.823333
	MasterMix+BHET (G04)	0	-2.22045e-16	0.213333	0.291333	0.322333	0.333667	0.347333	0.354333	0.359667	0.366333	0.373333	0.378667	0.383333	0.388	0.393	0.397333	0.401667	0.405333	0.409333	0.412667	0.416333	0.419667	0.423	0.426333	0.429333	0.432667	0.435	0.438333	0.441667	0.444333	0.446333	0.449667	0.453	0.455333	0.458	0.460667	0.463333	0.466	0.469	0.471	0.474	0.476	0.478667	0.481333	0.484	0.486333	0.488667	0.491333
	MaserMix No BHET	0	-0.091	0.0856667	0.157667	0.184333	0.195333	0.200667	0.204	0.206667	0.207667	0.208667	0.210333	0.212	0.213	0.213667	0.214667	0.215	0.216333	0.217	0.217667	0.218	0.218333	0.219	0.219333	0.22	0.220333	0.220333	0.221333	0.221667	0.221333	0.222333	0.222333	0.222667	0.222667	0.223333	0.223333	0.223333	0.223667	0.224667	0.224667	0.225	0.225	0.224667	0.225333	0.225667	0.226	0.225667	0.226
Experimental Replicate 2
	Time (min)	0	14.9998	29.9998	44.9998	59.9998	74.9998	89.9998	105	120	135	150	165	180	195	210	225	240	255	270	285	300	315	330	345	360	375	390	405	420	435	450	465	480	495	510	525	540	555	570	585	600	615	630	645	660	675	690	705
	Hours	0	0.249997	0.499997	0.749997	0.999997	1.25	1.5	1.75	2	2.25	2.5	2.75	3	3.25	3.5	3.75	4	4.25	4.5	4.75	5	5.25	5.5	5.75	6	6.25	6.5	6.75	7	7.25	7.5	7.75	8	8.25	8.5	8.75	9	9.25	9.5	9.75	10	10.25	10.5	10.75	11	11.25	11.5	11.75
1	T. fusca cutinase	0	0.288	0.6071	0.7318	0.7791	0.8002	0.8123	0.8212	0.831867	0.838567	0.845733	0.853833	0.8589	0.866	0.872633	0.8782	0.884533	0.890067	0.895967	0.9013	0.907067	0.911633	0.917267	0.921067	0.926167	0.9303	0.934933	0.938933	0.943067	0.947033	0.9506	0.954467	0.958033	0.961033	0.9646	0.9678	0.971133	0.974033	0.977433	0.979333	0.982333	0.9852	0.987567	0.9904	0.992967	0.9955	0.9974	0.999633
2	I. sakiensis PETase	0	0.592667	0.7891	0.8218	0.8361	0.8402	0.841967	0.840867	0.8372	0.836567	0.832733	0.8305	0.825567	0.824	0.822967	0.8222	0.819867	0.819067	0.8193	0.818633	0.8184	0.818967	0.818933	0.8194	0.8195	0.819967	0.821933	0.8226	0.823067	0.8237	0.8246	0.8248	0.8247	0.825367	0.8256	0.8258	0.826133	0.826367	0.8271	0.827	0.826667	0.826533	0.827233	0.8274	0.8273	0.8275	0.827067	0.8273
10	Geobacillus stearothermophilis esterase	0	0.620333	0.914767	1.0368	1.0831	1.12987	1.15097	1.16787	1.18387	1.19857	1.21173	1.22283	1.2319	1.24	1.24797	1.25387	1.25887	1.26407	1.2683	1.27197	1.27473	1.27763	1.28027	1.28207	1.28483	1.28597	1.28793	1.2896	1.2904	1.2917	1.2926	1.2938	1.29437	1.2947	1.29527	1.29613	1.29647	1.29737	1.29777	1.298	1.298	1.29887	1.29857	1.29907	1.29963	1.29983	1.29973	1.3003
11	Bacillus subilis esterase	0	0.576667	0.856433	0.787133	0.758767	0.760533	0.762967	0.7662	0.7692	0.7739	0.776733	0.780833	0.782567	0.785333	0.787633	0.789533	0.792533	0.7954	0.7973	0.799967	0.8024	0.8053	0.807267	0.808733	0.810167	0.811633	0.813267	0.8146	0.815733	0.817033	0.8186	0.8198	0.8207	0.822033	0.822933	0.824133	0.825133	0.826033	0.8271	0.828	0.828667	0.829533	0.830233	0.830733	0.830967	0.831833	0.8324	0.832633
	MasterMix+BHET (G04)	0	0	0.219433	0.291133	0.318433	0.329533	0.339633	0.344867	0.350533	0.355233	0.358733	0.3625	0.366233	0.363667	0.367967	0.371533	0.3752	0.3784	0.3823	0.384967	0.389067	0.389967	0.3956	0.396733	0.4015	0.4043	0.407933	0.410933	0.414067	0.417367	0.419933	0.422467	0.4257	0.428367	0.4306	0.434133	0.4358	0.439367	0.442767	0.445	0.447667	0.4502	0.4529	0.455733	0.4583	0.461167	0.4634	0.465633
	MaserMix No BHET	0	-0.107667	0.0877667	0.163133	0.1911	0.2012	0.206967	0.211533	0.213867	0.216233	0.217733	0.219167	0.2189	0.220667	0.221967	0.222533	0.223533	0.224067	0.224633	0.224633	0.225067	0.225967	0.226267	0.2264	0.227833	0.227633	0.228267	0.229267	0.2294	0.230033	0.230933	0.2308	0.231367	0.2317	0.2316	0.2318	0.2328	0.2327	0.233767	0.233333	0.233333	0.233867	0.2339	0.235067	0.234633	0.235167	0.235067	0.2353
[truncated: 50 more columns]

## Sheet: µmol Indicator Protonated
Experimental Replicate 1
	Time (min)	0	14.9998	29.9998	44.9998	59.9998	74.9998	89.9998	105	120	135	150	165	180	195	210	225	240	255	270	285	300	315	330	345	360	375	390	405	420	435	450	465	480	495	510	525	540	555	570	585	600	615	630	645	660	675	690	705
1	T. fusca cutinase	0	0.00197949	0.00432242	0.0050493	0.00529616	0.00544474	0.0054996	0.00556589	0.00562075	0.00566646	0.00569618	0.00574189	0.00576246	0.00580361	0.00583332	0.00586533	0.00589504	0.00592476	0.00595447	0.00598647	0.00600704	0.00604133	0.00606647	0.0060939	0.00611676	0.00614191	0.00616705	0.00619219	0.00621734	0.00623562	0.00626077	0.00628134	0.0063042	0.00632248	0.00634077	0.00636134	0.00637963	0.00639791	0.00641391	0.00643449	0.00644591	0.00646192	0.0064802	0.00649163	0.00650992	0.00652135	0.00653735	0.00654878
2	I. sakiensis PETase	0	0.00367783	0.00521388	0.00545846	0.0055796	0.00558417	0.00554989	0.0055156	0.00547446	0.00544017	0.00541274	0.00537388	0.00534417	0.00531445	0.00528474	0.00526188	0.00524816	0.00522759	0.00521616	0.00520473	0.00518645	0.00518188	0.00517502	0.00517273	0.00516359	0.0051613	0.00515216	0.00514987	0.00514073	0.00514073	0.00513387	0.00512473	0.00512473	0.00511787	0.00510873	0.00510873	0.00510644	0.00509959	0.00510187	0.00509502	0.00509044	0.00509044	0.00508587	0.00508359	0.00508587	0.00508359	0.0050813	0.0050813
10	Geobacillus stearothermophilis esterase	0	0.00410756	0.00625619	0.00704708	0.00727565	0.00757281	0.00771681	0.00782881	0.0079271	0.00801396	0.00808939	0.00815568	0.00821283	0.00826311	0.00831112	0.00834769	0.00838426	0.00841626	0.00844598	0.00846883	0.00848941	0.00850998	0.00852827	0.00854198	0.00855798	0.00856941	0.00858084	0.00859227	0.00859684	0.00860827	0.00861512	0.00862198	0.00862655	0.00863113	0.0086357	0.00864255	0.00864713	0.00864941	0.00865398	0.00865627	0.00865627	0.00865855	0.00866313	0.00866313	0.0086677	0.0086677	0.00867227	0.00867456
11	Bacillus subilis esterase	0	0.00378983	0.00575561	0.00538074	0.00508816	0.00507673	0.00506073	0.0050813	0.00511102	0.00513159	0.00516359	0.0051933	0.00521845	0.00524131	0.00526416	0.00528016	0.00529388	0.00531674	0.00533045	0.00534188	0.00536245	0.00538302	0.00539445	0.00541045	0.00542188	0.00542645	0.00543788	0.00544703	0.00545846	0.00546531	0.00547674	0.0054836	0.00549503	0.00550189	0.00551103	0.00551789	0.00552246	0.00553389	0.00553617	0.00554074	0.00554532	0.0055476	0.0055476	0.00554989	0.00555446	0.00555446	0.00555674	0.00564589
	MasterMix+BHET (G04)	0	-1.52264e-18	0.0014629	0.00199778	0.00221035	0.00228807	0.00238179	0.00242979	0.00246636	0.00251208	0.00256008	0.00259665	0.00262865	0.00266065	0.00269494	0.00272466	0.00275437	0.00277951	0.00280694	0.0028298	0.00285495	0.0028778	0.00290066	0.00292352	0.00294409	0.00296695	0.00298295	0.00300581	0.00302867	0.00304695	0.00306067	0.00308352	0.00310638	0.00312238	0.00314067	0.00315896	0.00317724	0.00319553	0.0032161	0.00322981	0.00325039	0.0032641	0.00328239	0.00330067	0.00331896	0.00333496	0.00335096	0.00336925
	MaserMix No BHET	0	-0.000624019	0.000587447	0.00108118	0.00126404	0.00133947	0.00137604	0.0013989	0.00141719	0.00142404	0.0014309	0.00144233	0.00145376	0.00146062	0.00146519	0.00147205	0.00147433	0.00148347	0.00148805	0.00149262	0.0014949	0.00149719	0.00150176	0.00150405	0.00150862	0.0015109	0.0015109	0.00151776	0.00152005	0.00151776	0.00152462	0.00152462	0.0015269	0.0015269	0.00153148	0.00153148	0.00153148	0.00153376	0.00154062	0.00154062	0.00154291	0.00154291	0.00154062	0.00154519	0.00154748	0.00154976	0.00154748	0.00154976
Experimental Replicate 2
	Time (min)	0	14.9998	29.9998	44.9998	59.9998	74.9998	89.9998	105	120	135	150	165	180	195	210	225	240	255	270	285	300	315	330	345	360	375	390	405	420	435	450	465	480	495	510	525	540	555	570	585	600	615	630	645	660	675	690	705
1	T. fusca cutinase	0	0.00197492	0.0041631	0.00501821	0.00534257	0.00548726	0.00557023	0.00563126	0.00570441	0.00575035	0.00579949	0.00585504	0.00588978	0.00593847	0.00598396	0.00602213	0.00606556	0.0061035	0.00614396	0.00618053	0.00622008	0.00625139	0.00629002	0.00631608	0.00635105	0.0063794	0.00641117	0.0064386	0.00646694	0.00649414	0.0065186	0.00654512	0.00656958	0.00659015	0.00661461	0.00663655	0.00665941	0.00667929	0.00670261	0.00671564	0.00673621	0.00675587	0.0067721	0.00679153	0.00680913	0.0068265	0.00683953	0.00685484
2	I. sakiensis PETase	0	0.00406413	0.00541114	0.00563538	0.00573344	0.00576155	0.00577367	0.00576612	0.00574098	0.00573664	0.00571035	0.00569503	0.0056612	0.00565046	0.00564338	0.00563812	0.00562212	0.00561663	0.00561823	0.00561366	0.00561206	0.00561595	0.00561572	0.00561892	0.0056196	0.0056228	0.00563629	0.00564086	0.00564406	0.0056484	0.00565458	0.00565595	0.00565526	0.00565983	0.00566143	0.0056628	0.00566509	0.00566669	0.00567172	0.00567103	0.00566875	0.00566783	0.00567263	0.00567378	0.00567309	0.00567446	0.00567149	0.00567309
10	Geobacillus stearothermophilis esterase	0	0.00425385	0.00627288	0.00710971	0.0074272	0.0077479	0.00789259	0.00800848	0.0081182	0.008219	0.00830929	0.0083854	0.00844758	0.00850312	0.00855775	0.00859821	0.0086325	0.00866816	0.00869718	0.00872233	0.0087413	0.00876119	0.00877924	0.00879159	0.00881056	0.00881833	0.00883182	0.00884325	0.00884873	0.00885765	0.00886382	0.00887205	0.00887593	0.00887822	0.0088821	0.00888805	0.00889033	0.00889651	0.00889925	0.00890085	0.00890085	0.00890679	0.00890473	0.00890816	0.00891205	0.00891342	0.00891273	0.00891662
11	Bacillus subilis esterase	0	0.00395441	0.00587287	0.00539765	0.00520313	0.00521525	0.00523193	0.00525411	0.00527468	0.00530691	0.00532634	0.00535445	0.00536634	0.00538531	0.00540108	0.00541411	0.00543468	0.00545434	0.00546737	0.00548566	0.00550234	0.00552223	0.00553571	0.00554577	0.0055556	0.00556566	0.00557686	0.005586	0.00559377	0.00560269	0.00561343	0.00562166	0.00562783	0.00563698	0.00564315	0.00565138	0.00565823	0.0056644	0.00567172	0.00567789	0.00568246	0.00568841	0.00569321	0.00569663	0.00569823	0.00570418	0.00570806	0.00570966
	MasterMix+BHET	0	0	0.00150473	0.0019964	0.00218361	0.00225973	0.00232899	0.00236487	0.00240373	0.00243596	0.00245996	0.00248579	0.00251139	0.00249379	0.00252328	0.00254774	0.00257288	0.00259482	0.00262157	0.00263985	0.00266797	0.00267414	0.00271277	0.00272054	0.00275323	0.00277243	0.00279734	0.00281792	0.0028394	0.00286203	0.00287963	0.002897	0.00291918	0.00293746	0.00295278	0.00297701	0.00298844	0.00301289	0.00303621	0.00305152	0.00306981	0.00308718	0.0031057	0.00312513	0.00314273	0.00316238	0.0031777	0.00319301
	MasterMix No BHET	0	-0.000738309	0.000601847	0.00111866	0.00131044	0.0013797	0.00141924	0.00145056	0.00146656	0.00148279	0.00149307	0.0015029	0.00150108	0.00151319	0.0015221	0.00152599	0.00153285	0.0015365	0.00154039	0.00154039	0.00154336	0.00154953	0.00155159	0.00155251	0.00156233	0.00156096	0.00156531	0.00157216	0.00157308	0.00157742	0.00158359	0.00158268	0.00158656	0.00158885	0.00158816	0.00158954	0.00159639	0.00159571	0.00160302	0.00160005	0.00160005	0.00160371	0.00160394	0.00161194	0.00160896	0.00161262	0.00161194	0.00161354
[truncated: 50 more columns]

## Sheet: µmol Buffer Protonated
	µmol buffer protonated
Experimental Replicate 1
	Time (min)	0	14.9998	29.9998	44.9998	59.9998	74.9998	89.9998	105	120	135	150	165	180	195	210	225	240	255	270	285	300	315	330	345	360	375	390	405	420	435	450	465	480	495	510	525	540	555	570	585	600	615	630	645	660	675	690	705
1	T. fusca cutinase	0	0.0989745	0.216121	0.252465	0.264808	0.272237	0.27498	0.278294	0.281037	0.283323	0.284809	0.287095	0.288123	0.29018	0.291666	0.293266	0.294752	0.296238	0.297724	0.299324	0.300352	0.302067	0.303324	0.304695	0.305838	0.307095	0.308352	0.30961	0.310867	0.311781	0.313038	0.314067	0.31521	0.316124	0.317038	0.318067	0.318981	0.319896	0.320696	0.321724	0.322296	0.323096	0.32401	0.324582	0.325496	0.326067	0.326867	0.327439
2	I. sakiensis PETase	0	0.183891	0.260694	0.272923	0.27898	0.279209	0.277494	0.27578	0.273723	0.272008	0.270637	0.268694	0.267208	0.265723	0.264237	0.263094	0.262408	0.26138	0.260808	0.260237	0.259322	0.259094	0.258751	0.258637	0.258179	0.258065	0.257608	0.257494	0.257037	0.257037	0.256694	0.256237	0.256237	0.255894	0.255437	0.255437	0.255322	0.254979	0.255094	0.254751	0.254522	0.254522	0.254294	0.254179	0.254294	0.254179	0.254065	0.254065
10	Geobacillus stearothermophilis esterase	0	0.205378	0.31281	0.352354	0.363783	0.37864	0.385841	0.391441	0.396355	0.400698	0.40447	0.407784	0.410641	0.413156	0.415556	0.417384	0.419213	0.420813	0.422299	0.423442	0.42447	0.425499	0.426413	0.427099	0.427899	0.42847	0.429042	0.429613	0.429842	0.430413	0.430756	0.431099	0.431328	0.431556	0.431785	0.432128	0.432356	0.432471	0.432699	0.432813	0.432813	0.432928	0.433156	0.433156	0.433385	0.433385	0.433613	0.433728
11	Bacillus subilis esterase	0	0.189492	0.28778	0.269037	0.254408	0.253836	0.253036	0.254065	0.255551	0.256579	0.258179	0.259665	0.260922	0.262065	0.263208	0.264008	0.264694	0.265837	0.266523	0.267094	0.268123	0.269151	0.269723	0.270523	0.271094	0.271323	0.271894	0.272351	0.272923	0.273266	0.273837	0.27418	0.274751	0.275094	0.275551	0.275894	0.276123	0.276694	0.276809	0.277037	0.277266	0.27738	0.27738	0.277494	0.277723	0.277723	0.277837	0.282294
	MasterMix+BHET (G04)	0	-7.61319e-17	0.0731451	0.0998888	0.110518	0.114404	0.119089	0.121489	0.123318	0.125604	0.128004	0.129833	0.131433	0.133033	0.134747	0.136233	0.137719	0.138976	0.140347	0.14149	0.142747	0.14389	0.145033	0.146176	0.147205	0.148347	0.149147	0.15029	0.151433	0.152348	0.153033	0.154176	0.155319	0.156119	0.157033	0.157948	0.158862	0.159776	0.160805	0.161491	0.162519	0.163205	0.164119	0.165034	0.165948	0.166748	0.167548	0.168462
	MaserMix No BHET	0	-0.031201	0.0293723	0.0540588	0.063202	0.0669735	0.0688021	0.069945	0.0708593	0.0712022	0.0715451	0.0721165	0.072688	0.0730308	0.0732594	0.0736023	0.0737166	0.0741737	0.0744023	0.0746309	0.0747452	0.0748595	0.075088	0.0752023	0.0754309	0.0755452	0.0755452	0.0758881	0.0760024	0.0758881	0.0762309	0.0762309	0.0763452	0.0763452	0.0765738	0.0765738	0.0765738	0.0766881	0.077031	0.077031	0.0771453	0.0771453	0.077031	0.0772595	0.0773738	0.0774881	0.0773738	0.0774881
Experimental Replicate 2
	Time (min)	0	14.9998	29.9998	44.9998	59.9998	74.9998	89.9998	105	120	135	150	165	180	195	210	225	240	255	270	285	300	315	330	345	360	375	390	405	420	435	450	465	480	495	510	525	540	555	570	585	600	615	630	645	660	675	690	705
1	T. fusca cutinase	0	0.0987459	0.208155	0.250911	0.267128	0.274363	0.278512	0.281563	0.28522	0.287518	0.289975	0.292752	0.294489	0.296924	0.299198	0.301107	0.303278	0.305175	0.307198	0.309027	0.311004	0.31257	0.314501	0.315804	0.317553	0.31897	0.320559	0.32193	0.323347	0.324707	0.32593	0.327256	0.328479	0.329507	0.33073	0.331827	0.33297	0.333965	0.33513	0.335782	0.33681	0.337793	0.338605	0.339576	0.340456	0.341325	0.341976	0.342742
2	I. sakiensis PETase	0	0.203206	0.270557	0.281769	0.286672	0.288078	0.288683	0.288306	0.287049	0.286832	0.285517	0.284752	0.28306	0.282523	0.282169	0.281906	0.281106	0.280832	0.280912	0.280683	0.280603	0.280797	0.280786	0.280946	0.28098	0.28114	0.281814	0.282043	0.282203	0.28242	0.282729	0.282797	0.282763	0.282992	0.283072	0.28314	0.283255	0.283335	0.283586	0.283552	0.283437	0.283392	0.283632	0.283689	0.283655	0.283723	0.283575	0.283655
10	Geobacillus stearothermophilis esterase	0	0.212692	0.313644	0.355485	0.37136	0.387395	0.394629	0.400424	0.40591	0.41095	0.415464	0.41927	0.422379	0.425156	0.427888	0.429911	0.431625	0.433408	0.434859	0.436116	0.437065	0.438059	0.438962	0.439579	0.440528	0.440917	0.441591	0.442162	0.442437	0.442882	0.443191	0.443602	0.443797	0.443911	0.444105	0.444402	0.444517	0.444825	0.444962	0.445042	0.445042	0.44534	0.445237	0.445408	0.445602	0.445671	0.445637	0.445831
11	Bacillus subilis esterase	0	0.19772	0.293643	0.269883	0.260157	0.260762	0.261597	0.262705	0.263734	0.265345	0.266317	0.267723	0.268317	0.269266	0.270054	0.270706	0.271734	0.272717	0.273368	0.274283	0.275117	0.276111	0.276786	0.277289	0.27778	0.278283	0.278843	0.2793	0.279689	0.280134	0.280672	0.281083	0.281392	0.281849	0.282157	0.282569	0.282912	0.28322	0.283586	0.283895	0.284123	0.28442	0.28466	0.284832	0.284912	0.285209	0.285403	0.285483
	MasterMix+BHET (G04)	0	0	0.0752366	0.0998202	0.109181	0.112986	0.116449	0.118244	0.120187	0.121798	0.122998	0.12429	0.12557	0.12469	0.126164	0.127387	0.128644	0.129741	0.131078	0.131993	0.133398	0.133707	0.135639	0.136027	0.137661	0.138621	0.139867	0.140896	0.14197	0.143102	0.143982	0.14485	0.145959	0.146873	0.147639	0.14885	0.149422	0.150645	0.15181	0.152576	0.15349	0.154359	0.155285	0.156256	0.157136	0.158119	0.158885	0.159651
	MaserMix No BHET	0	-0.0369154	0.0300924	0.0559332	0.065522	0.068985	0.0709622	0.072528	0.073328	0.0741394	0.0746537	0.0751452	0.0750538	0.0756595	0.0761052	0.0762995	0.0766424	0.0768252	0.0770195	0.0770195	0.0771681	0.0774767	0.0775796	0.0776253	0.0781167	0.0780481	0.0782653	0.0786082	0.0786539	0.078871	0.0791796	0.0791339	0.0793282	0.0794425	0.0794082	0.0794768	0.0798196	0.0797853	0.0801511	0.0800025	0.0800025	0.0801853	0.0801968	0.0805968	0.0804482	0.0806311	0.0805968	0.0806768
[truncated: 50 more columns]

## Sheet: µmol Ester Cleaved
Experimental Replicate 1
	Time (min)	0	15	30	45	60	75	90	105	120	135	150	165	180	195	210	225	240	255	270	285	300	315	330	345	360	375	390	405	420	435	450	465	480	495	510	525	540	555	570	585	600	615	630	645	660	675	690	705
1	T. fusca cutinase	0	0.100954	0.220443	0.257514	0.270104	0.277682	0.28048	0.28386	0.286658	0.28899	0.290505	0.292837	0.293886	0.295984	0.2975	0.299132	0.300647	0.302163	0.303678	0.30531	0.306359	0.308108	0.30939	0.310789	0.311955	0.313237	0.314519	0.315802	0.317084	0.318017	0.319299	0.320348	0.321514	0.322447	0.323379	0.324428	0.325361	0.326294	0.32711	0.328159	0.328742	0.329558	0.33049	0.331073	0.332006	0.332589	0.333405	0.333988
2	I. sakiensis PETase	0	0.187569	0.265908	0.278381	0.28456	0.284793	0.283044	0.281296	0.279197	0.277449	0.27605	0.274068	0.272552	0.271037	0.269522	0.268356	0.267656	0.266607	0.266024	0.265441	0.264509	0.264276	0.263926	0.263809	0.263343	0.263226	0.26276	0.262644	0.262177	0.262177	0.261828	0.261361	0.261361	0.261012	0.260545	0.260545	0.260429	0.260079	0.260196	0.259846	0.259613	0.259613	0.259379	0.259263	0.259379	0.259263	0.259146	0.259146
10	Geobacillus stearothermophilis esterase	0	0.209485	0.319066	0.359401	0.371058	0.386213	0.393557	0.39927	0.404282	0.408712	0.412559	0.41594	0.418854	0.421419	0.423867	0.425732	0.427597	0.429229	0.430745	0.431911	0.43296	0.434009	0.434942	0.435641	0.436457	0.43704	0.437623	0.438206	0.438439	0.439022	0.439371	0.439721	0.439954	0.440187	0.440421	0.44077	0.441003	0.44112	0.441353	0.44147	0.44147	0.441586	0.441819	0.441819	0.442053	0.442053	0.442286	0.442402
11	Bacillus subilis esterase	0	0.193281	0.293536	0.274418	0.259496	0.258913	0.258097	0.259146	0.260662	0.261711	0.263343	0.264859	0.266141	0.267307	0.268472	0.269288	0.269988	0.271154	0.271853	0.272436	0.273485	0.274534	0.275117	0.275933	0.276516	0.276749	0.277332	0.277798	0.278381	0.278731	0.279314	0.279664	0.280246	0.280596	0.281062	0.281412	0.281645	0.282228	0.282345	0.282578	0.282811	0.282928	0.282928	0.283044	0.283277	0.283277	0.283394	0.28794
	MasterMix+BHET (G04)	0	-7.76546e-17	0.074608	0.101887	0.112728	0.116692	0.121471	0.123919	0.125784	0.128116	0.130564	0.132429	0.134061	0.135693	0.137442	0.138957	0.140473	0.141755	0.143154	0.14432	0.145602	0.146768	0.147934	0.149099	0.150149	0.151314	0.15213	0.153296	0.154462	0.155395	0.156094	0.15726	0.158425	0.159242	0.160174	0.161107	0.162039	0.162972	0.164021	0.164721	0.16577	0.166469	0.167402	0.168334	0.169267	0.170083	0.170899	0.171832
	MaserMix No BHET	0	-0.031825	0.0299598	0.05514	0.064466	0.068313	0.0701782	0.0713439	0.0722765	0.0726263	0.072976	0.0735589	0.0741417	0.0744915	0.0747246	0.0750743	0.0751909	0.0756572	0.0758904	0.0761235	0.0762401	0.0763567	0.0765898	0.0767064	0.0769395	0.0770561	0.0770561	0.0774058	0.0775224	0.0774058	0.0777556	0.0777556	0.0778721	0.0778721	0.0781053	0.0781053	0.0781053	0.0782219	0.0785716	0.0785716	0.0786882	0.0786882	0.0785716	0.0788047	0.0789213	0.0790379	0.0789213	0.0790379
Experimental Replicate 2
	Time (min)	0	15	30	45	60	75	90	105	120	135	150	165	180	195	210	225	240	255	270	285	300	315	330	345	360	375	390	405	420	435	450	465	480	495	510	525	540	555	570	585	600	615	630	645	660	675	690	705
1	T. fusca cutinase	0	0.100721	0.212318	0.255929	0.272471	0.27985	0.284082	0.287194	0.290925	0.293268	0.295774	0.298607	0.300379	0.302862	0.305182	0.307129	0.309344	0.311279	0.313342	0.315207	0.317224	0.318821	0.320791	0.32212	0.323904	0.325349	0.32697	0.328369	0.329814	0.331201	0.332449	0.333801	0.335048	0.336098	0.337345	0.338464	0.33963	0.340644	0.341833	0.342498	0.343547	0.344549	0.345377	0.346368	0.347265	0.348151	0.348816	0.349597
2	I. sakiensis PETase	0	0.20727	0.275968	0.287404	0.292405	0.293839	0.294457	0.294072	0.29279	0.292568	0.291228	0.290447	0.288721	0.288174	0.287812	0.287544	0.286728	0.286448	0.28653	0.286297	0.286215	0.286413	0.286402	0.286565	0.2866	0.286763	0.287451	0.287684	0.287847	0.288069	0.288383	0.288453	0.288418	0.288651	0.288733	0.288803	0.28892	0.289001	0.289258	0.289223	0.289106	0.289059	0.289304	0.289363	0.289328	0.289398	0.289246	0.289328
10	Geobacillus stearothermophilis esterase	0	0.216946	0.319917	0.362595	0.378787	0.395143	0.402522	0.408432	0.414028	0.419169	0.423774	0.427656	0.430826	0.433659	0.436445	0.438509	0.440257	0.442076	0.443556	0.444839	0.445806	0.446821	0.447741	0.448371	0.449339	0.449735	0.450423	0.451006	0.451285	0.45174	0.452055	0.452474	0.452673	0.452789	0.452987	0.45329	0.453407	0.453722	0.453862	0.453943	0.453943	0.454246	0.454141	0.454316	0.454514	0.454584	0.454549	0.454748
11	Bacillus subilis esterase	0	0.201675	0.299516	0.27528	0.26536	0.265978	0.266829	0.267959	0.269009	0.270652	0.271643	0.273077	0.273683	0.274651	0.275455	0.27612	0.277169	0.278171	0.278836	0.279768	0.280619	0.281634	0.282321	0.282834	0.283336	0.283849	0.28442	0.284886	0.285282	0.285737	0.286285	0.286705	0.287019	0.287486	0.2878	0.28822	0.28857	0.288885	0.289258	0.289572	0.289806	0.290109	0.290353	0.290528	0.29061	0.290913	0.291111	0.291193
	MasterMix+BHET	0	0	0.0767414	0.101817	0.111364	0.115246	0.118778	0.120609	0.12259	0.124234	0.125458	0.126775	0.128081	0.127183	0.128687	0.129935	0.131217	0.132336	0.1337	0.134633	0.136066	0.136381	0.138351	0.138748	0.140415	0.141394	0.142665	0.143714	0.14481	0.145964	0.146861	0.147747	0.148878	0.149811	0.150592	0.151827	0.15241	0.153658	0.154847	0.155628	0.15656	0.157446	0.158391	0.159381	0.160279	0.161282	0.162063	0.162844
	MaserMix No BHET	0	-0.0376537	0.0306942	0.0570518	0.0668325	0.0703647	0.0723815	0.0739785	0.0747946	0.0756222	0.0761468	0.0766481	0.0765548	0.0771727	0.0776273	0.0778255	0.0781752	0.0783618	0.0785599	0.0785599	0.0787115	0.0790262	0.0791311	0.0791778	0.079679	0.0796091	0.0798306	0.0801803	0.080227	0.0804484	0.0807632	0.0807166	0.0809147	0.0810313	0.0809963	0.0810663	0.081416	0.081381	0.0817541	0.0816025	0.0816025	0.0817891	0.0818007	0.0822087	0.0820572	0.0822437	0.0822087	0.0822903
	AVERAGE
	Time (min)	0	15	30	45	60	75	90	105	120	135	150	165	180	195	210	225	240	255	270	285	300	315	330	345	360	375	390	405	420	435	450	465	480	495	510	525	540	555	570	585	600	615	630	645	660	675	690	705
1	T. fusca cutinase	0	0.100837	0.216381	0.256722	0.271288	0.278766	0.282281	0.285527	0.288791	0.291129	0.29314	0.295722	0.297132	0.299423	0.301341	0.30313	0.304995	0.306721	0.30851	0.310259	0.311792	0.313464	0.315091	0.316455	0.317929	0.319293	0.320745	0.322085	0.323449	0.324609	0.325874	0.327075	0.328281	0.329272	0.330362	0.331446	0.332495	0.333469	0.334471	0.335328	0.336144	0.337053	0.337934	0.33872	0.339636	0.34037	0.34111	0.341792
2	I. sakiensis PETase	0	0.19742	0.270938	0.282893	0.288482	0.289316	0.288751	0.287684	0.285994	0.285009	0.283639	0.282257	0.280637	0.279605	0.278667	0.27795	0.277192	0.276528	0.276277	0.275869	0.275362	0.275344	0.275164	0.275187	0.274971	0.274995	0.275105	0.275164	0.275012	0.275123	0.275105	0.274907	0.27489	0.274832	0.274639	0.274674	0.274674	0.27454	0.274727	0.274534	0.274359	0.274336	0.274342	0.274313	0.274354	0.27433	0.274196	0.274237
10	Geobacillus stearothermophilis esterase	0	0.213216	0.319491	0.360998	0.374923	0.390678	0.39804	0.403851	0.409155	0.413941	0.418166	0.421798	0.42484	0.427539	0.430156	0.43212	0.433927	0.435653	0.437151	0.438375	0.439383	0.440415	0.441341	0.442006	0.442898	0.443387	0.444023	0.444606	0.444862	0.445381	0.445713	0.446098	0.446313	0.446488	0.446704	0.44703	0.447205	0.447421	0.447607	0.447706	0.447706	0.447916	0.44798	0.448068	0.448284	0.448319	0.448418	0.448575
11	Bacillus subilis esterase	0	0.197478	0.296526	0.274849	0.262428	0.262445	0.262463	0.263553	0.264835	0.266182	0.267493	0.268968	0.269912	0.270979	0.271964	0.272704	0.273578	0.274662	0.275344	0.276102	0.277052	0.278084	0.278719	0.279384	0.279926	0.280299	0.280876	0.281342	0.281832	0.282234	0.282799	0.283184	0.283633	0.284041	0.284431	0.284816	0.285108	0.285556	0.285801	0.286075	0.286308	0.286518	0.286641	0.286786	0.286944	0.287095	0.287253	0.289567
	MasterMix+BHET	0	-3.88273e-17	0.0756747	0.101852	0.112046	0.115969	0.120125	0.122264	0.124187	0.126175	0.128011	0.129602	0.131071	0.131438	0.133065	0.134446	0.135845	0.137046	0.138427	0.139476	0.140834	0.141575	0.143143	0.143924	0.145282	0.146354	0.147397	0.148505	0.149636	0.150679	0.151478	0.152503	0.153652	0.154526	0.155383	0.156467	0.157225	0.158315	0.159434	0.160174	0.161165	0.161958	0.162896	0.163858	0.164773	0.165682	0.166481	0.167338
	MaserMix No BHET	0	-0.0347394	0.030327	0.0560959	0.0656492	0.0693388	0.0712798	0.0726612	0.0735355	0.0741242	0.0745614	0.0751035	0.0753483	0.0758321	0.076176	0.0764499	0.0766831	0.0770095	0.0772251	0.0773417	0.0774758	0.0776914	0.0778605	0.0779421	0.0783093	0.0783326	0.0784434	0.0787931	0.0788747	0.0789271	0.0792594	0.0792361	0.0793934	0.0794517	0.0795508	0.0795858	0.0797607	0.0798015	0.0801628	0.0800871	0.0801453	0.0802386	0.0801861	0.0805067	0.0804892	0.0806408	0.080565	0.0806641
[truncated: 49 more columns]

## Sheet: mM Ester Cleaved
Experimental Replicate 1
	Time (min)	0	14.9998	29.9998	44.9998	59.9998	74.9998	89.9998	105	120	135	150	165	180	195	210	225	240	255	270	285	300	315	330	345	360	375	390	405	420	435	450	465	480	495	510	525	540	555	570	585	600	615	630	645	660	675	690	705
	Hours	0	0.249997	0.499997	0.749997	0.999997	1.25	1.5	1.75	2	2.25	2.5	2.75	3	3.25	3.5	3.75	4	4.25	4.5	4.75	5	5.25	5.5	5.75	6	6.25	6.5	6.75	7	7.25	7.5	7.75	8	8.25	8.5	8.75	9	9.25	9.5	9.75	10	10.25	10.5	10.75	11	11.25	11.5	11.75
1	T. fusca cutinase	0	0.50477	1.10222	1.28757	1.35052	1.38841	1.4024	1.4193	1.43329	1.44495	1.45253	1.46418	1.46943	1.47992	1.4875	1.49566	1.50324	1.51081	1.51839	1.52655	1.5318	1.54054	1.54695	1.55395	1.55977	1.56619	1.5726	1.57901	1.58542	1.59008	1.5965	1.60174	1.60757	1.61223	1.6169	1.62214	1.6268	1.63147	1.63555	1.64079	1.64371	1.64779	1.65245	1.65537	1.66003	1.66294	1.66702	1.66994
2	I. sakiensis PETase	0	0.937846	1.32954	1.39191	1.4228	1.42396	1.41522	1.40648	1.39599	1.38724	1.38025	1.37034	1.36276	1.35518	1.34761	1.34178	1.33828	1.33304	1.33012	1.32721	1.32254	1.32138	1.31963	1.31905	1.31672	1.31613	1.3138	1.31322	1.31089	1.31089	1.30914	1.30681	1.30681	1.30506	1.30273	1.30273	1.30214	1.30039	1.30098	1.29923	1.29806	1.29806	1.2969	1.29631	1.2969	1.29631	1.29573	1.29573
10	Geobacillus stearothermophilis esterase	0	1.04743	1.59533	1.797	1.85529	1.93107	1.96779	1.99635	2.02141	2.04356	2.0628	2.0797	2.09427	2.10709	2.11933	2.12866	2.13799	2.14615	2.15372	2.15955	2.1648	2.17004	2.17471	2.1782	2.18228	2.1852	2.18811	2.19103	2.19219	2.19511	2.19686	2.19861	2.19977	2.20094	2.2021	2.20385	2.20502	2.2056	2.20677	2.20735	2.20735	2.20793	2.2091	2.2091	2.21026	2.21026	2.21143	2.21201
11	Bacillus subilis esterase	0	0.966407	1.46768	1.37209	1.29748	1.29457	1.29049	1.29573	1.30331	1.30855	1.31672	1.32429	1.3307	1.33653	1.34236	1.34644	1.34994	1.35577	1.35927	1.36218	1.36743	1.37267	1.37559	1.37967	1.38258	1.38375	1.38666	1.38899	1.39191	1.39365	1.39657	1.39832	1.40123	1.40298	1.40531	1.40706	1.40823	1.41114	1.41172	1.41289	1.41406	1.41464	1.41464	1.41522	1.41639	1.41639	1.41697	1.4397
	MasterMix+BHET (G04)	0	-3.88273e-16	0.37304	0.509433	0.56364	0.583458	0.607356	0.619596	0.628922	0.64058	0.65282	0.662146	0.670307	0.678467	0.68721	0.694787	0.702365	0.708776	0.715771	0.7216	0.728011	0.73384	0.739669	0.745497	0.750743	0.756572	0.760652	0.766481	0.77231	0.776973	0.78047	0.786299	0.792127	0.796208	0.800871	0.805534	0.810197	0.81486	0.820105	0.823603	0.828849	0.832346	0.837009	0.841672	0.846335	0.850415	0.854495	0.859158
	MaserMix No BHET	0	-0.159125	0.149799	0.2757	0.32233	0.341565	0.350891	0.35672	0.361383	0.363131	0.36488	0.367794	0.370709	0.372457	0.373623	0.375372	0.375955	0.378286	0.379452	0.380618	0.3812	0.381783	0.382949	0.383532	0.384698	0.385281	0.385281	0.387029	0.387612	0.387029	0.388778	0.388778	0.389361	0.389361	0.390526	0.390526	0.390526	0.391109	0.392858	0.392858	0.393441	0.393441	0.392858	0.394024	0.394607	0.395189	0.394607	0.395189
Experimental Replicate 2
	Time (min)	0	14.9998	29.9998	44.9998	59.9998	74.9998	89.9998	105	120	135	150	165	180	195	210	225	240	255	270	285	300	315	330	345	360	375	390	405	420	435	450	465	480	495	510	525	540	555	570	585	600	615	630	645	660	675	690	705
1	T. fusca cutinase	0	0.503604	1.06159	1.27964	1.36235	1.39925	1.42041	1.43597	1.45462	1.46634	1.47887	1.49303	1.50189	1.51431	1.52591	1.53564	1.54672	1.55639	1.56671	1.57604	1.58612	1.59411	1.60396	1.6106	1.61952	1.62675	1.63485	1.64184	1.64907	1.65601	1.66224	1.66901	1.67524	1.68049	1.68672	1.69232	1.69815	1.70322	1.70917	1.71249	1.71773	1.72275	1.72688	1.73184	1.73633	1.74076	1.74408	1.74798
2	I. sakiensis PETase	0	1.03635	1.37984	1.43702	1.46203	1.4692	1.47228	1.47036	1.46395	1.46284	1.45614	1.45223	1.44361	1.44087	1.43906	1.43772	1.43364	1.43224	1.43265	1.43148	1.43108	1.43207	1.43201	1.43282	1.433	1.43381	1.43725	1.43842	1.43924	1.44034	1.44192	1.44227	1.44209	1.44326	1.44367	1.44402	1.4446	1.44501	1.44629	1.44611	1.44553	1.4453	1.44652	1.44681	1.44664	1.44699	1.44623	1.44664
10	Geobacillus stearothermophilis esterase	0	1.08473	1.59958	1.81298	1.89394	1.97571	2.01261	2.04216	2.07014	2.09584	2.11887	2.13828	2.15413	2.1683	2.18223	2.19254	2.20129	2.21038	2.21778	2.22419	2.22903	2.2341	2.23871	2.24185	2.24669	2.24867	2.25211	2.25503	2.25643	2.2587	2.26027	2.26237	2.26336	2.26395	2.26494	2.26645	2.26704	2.26861	2.26931	2.26972	2.26972	2.27123	2.27071	2.27158	2.27257	2.27292	2.27275	2.27374
11	Bacillus subilis esterase	0	1.00837	1.49758	1.3764	1.3268	1.32989	1.33414	1.3398	1.34504	1.35326	1.35822	1.36539	1.36842	1.37325	1.37728	1.3806	1.38584	1.39086	1.39418	1.39884	1.4031	1.40817	1.41161	1.41417	1.41668	1.41924	1.4221	1.42443	1.42641	1.42869	1.43143	1.43352	1.4351	1.43743	1.439	1.4411	1.44285	1.44442	1.44629	1.44786	1.44903	1.45054	1.45177	1.45264	1.45305	1.45457	1.45556	1.45596
	MasterMix+BHET	0	0	0.383707	0.509083	0.556821	0.57623	0.593892	0.603043	0.612952	0.62117	0.62729	0.633877	0.640405	0.635917	0.643436	0.649673	0.656084	0.66168	0.6685	0.673163	0.680332	0.681906	0.691756	0.693738	0.702073	0.706969	0.713323	0.718569	0.724048	0.729818	0.734306	0.738736	0.74439	0.749053	0.752958	0.759137	0.762051	0.768288	0.774233	0.778138	0.782801	0.787231	0.791953	0.796907	0.801395	0.806408	0.810313	0.814218
	MaserMix No BHET	0	-0.188269	0.153471	0.285259	0.334162	0.351824	0.361907	0.369893	0.373973	0.378111	0.380734	0.38324	0.382774	0.385863	0.388137	0.389128	0.390876	0.391809	0.3928	0.3928	0.393557	0.395131	0.395656	0.395889	0.398395	0.398046	0.399153	0.400902	0.401135	0.402242	0.403816	0.403583	0.404574	0.405157	0.404982	0.405331	0.40708	0.406905	0.40877	0.408013	0.408013	0.408945	0.409004	0.411044	0.410286	0.411218	0.411044	0.411452
	Average
	Time (min)	0	14.9998	29.9998	44.9998	59.9998	74.9998	89.9998	105	120	135	150	165	180	195	210	225	240	255	270	285	300	315	330	345	360	375	390	405	420	435	450	465	480	495	510	525	540	555	570	585	600	615	630	645	660	675	690	705
1	T. fusca cutinase	0	0.504187	1.0819	1.28361	1.35644	1.39383	1.4114	1.42764	1.44396	1.45564	1.4657	1.47861	1.48566	1.49712	1.5067	1.51565	1.52498	1.5336	1.54255	1.55129	1.55896	1.56732	1.57545	1.58227	1.58965	1.59647	1.60372	1.61043	1.61725	1.62305	1.62937	1.63537	1.64141	1.64636	1.65181	1.65723	1.66248	1.66734	1.67236	1.67664	1.68072	1.68527	1.68967	1.6936	1.69818	1.70185	1.70555	1.70896
2	I. sakiensis PETase	0	0.987099	1.35469	1.41446	1.44241	1.44658	1.44375	1.43842	1.42997	1.42504	1.41819	1.41129	1.40318	1.39803	1.39333	1.38975	1.38596	1.38264	1.38139	1.37935	1.37681	1.37672	1.37582	1.37594	1.37486	1.37497	1.37553	1.37582	1.37506	1.37561	1.37553	1.37454	1.37445	1.37416	1.3732	1.37337	1.37337	1.3727	1.37363	1.37267	1.3718	1.37168	1.37171	1.37156	1.37177	1.37165	1.37098	1.37118
10	Geobacillus stearothermophilis esterase	0	1.06608	1.59746	1.80499	1.87461	1.95339	1.9902	2.01925	2.04578	2.0697	2.09083	2.10899	2.1242	2.1377	2.15078	2.1606	2.16964	2.17826	2.18575	2.19187	2.19692	2.20207	2.20671	2.21003	2.21449	2.21694	2.22011	2.22303	2.22431	2.2269	2.22857	2.23049	2.23157	2.23244	2.23352	2.23515	2.23603	2.2371	2.23804	2.23853	2.23853	2.23958	2.2399	2.24034	2.24142	2.24159	2.24209	2.24287
11	Bacillus subilis esterase	0	0.987391	1.48263	1.37425	1.31214	1.31223	1.31231	1.31776	1.32418	1.33091	1.33747	1.34484	1.34956	1.35489	1.35982	1.36352	1.36789	1.37331	1.37672	1.38051	1.38526	1.39042	1.3936	1.39692	1.39963	1.40149	1.40438	1.40671	1.40916	1.41117	1.414	1.41592	1.41816	1.4202	1.42216	1.42408	1.42554	1.42778	1.42901	1.43038	1.43154	1.43259	1.4332	1.43393	1.43472	1.43548	1.43626	1.44783
	MasterMix+BHET	0	-1.94136e-16	0.378373	0.509258	0.560231	0.579844	0.600624	0.61132	0.620937	0.630875	0.640055	0.648012	0.655356	0.657192	0.665323	0.67223	0.679225	0.685228	0.692135	0.697381	0.704172	0.707873	0.715713	0.719618	0.726408	0.731771	0.736987	0.742525	0.748179	0.753395	0.757388	0.762517	0.768259	0.77263	0.776914	0.782335	0.786124	0.791574	0.797169	0.800871	0.805825	0.809789	0.814481	0.819289	0.823865	0.828411	0.832404	0.836688
	MaserMix No BHET	0	-0.173697	0.151635	0.28048	0.328246	0.346694	0.356399	0.363306	0.367678	0.370621	0.372807	0.375517	0.376741	0.37916	0.38088	0.38225	0.383415	0.385047	0.386126	0.386709	0.387379	0.388457	0.389302	0.38971	0.391546	0.391663	0.392217	0.393965	0.394373	0.394636	0.396297	0.39618	0.396967	0.397259	0.397754	0.397929	0.398803	0.399007	0.400814	0.400435	0.400727	0.401193	0.400931	0.402534	0.402446	0.403204	0.402825	0.403321
[truncated: 50 more columns]

## Sheet: STDEV
	STDEV of ∆ABS
Experimental Replicate 1
	Hours	0	0.25	0.5	0.75	1	1.25	1.5	1.75	2	2.25	2.5	2.75	3	3.25	3.5	3.75	4	4.25	4.5	4.75	5	5.25	5.5	5.75	6	6.25	6.5	6.75	7	7.25	7.5	7.75	8	8.25	8.5	8.75	9	9.25	9.5	9.75	10	10.25	10.5	10.75	11	11.25	11.5	11.75
1	T. fusca cutinase	0	0.0181475	0.0221435	0.0220303	0.0188768	0.0172143	0.0149332	0.0134536	0.0134288	0.0138924	0.0124231	0.0151438	0.0150444	0.0147986	0.0150444	0.0165227	0.0162891	0.0160728	0.0164418	0.0166533	0.0166533	0.0160935	0.0163707	0.0169214	0.0163707	0.0168028	0.0172434	0.0176918	0.0171561	0.0176163	0.0176163	0.0175594	0.0176163	0.017088	0.017088	0.0175594	0.0170392	0.0175594	0.0175594	0.0170392	0.0175594	0.0170392	0.0175214	0.0175594	0.0170392	0.0175594	0.0170392	0.0170392
2	I. sakiensis PETase	0	0.0104403	0.028006	0.0387341	0.0416173	0.0425088	0.0425793	0.0417612	0.0443959	0.0451331	0.0460036	0.0487545	0.047184	0.0465439	0.0485901	0.047634	0.0459239	0.0457092	0.0481802	0.0463573	0.0455448	0.0464901	0.0461303	0.0457967	0.0461988	0.047571	0.0479826	0.0486861	0.0496622	0.0499733	0.0513907	0.0517301	0.0527162	0.0545191	0.0545191	0.0559673	0.0573527	0.0582866	0.0592818	0.0602246	0.0616523	0.0626126	0.0630952	0.0646091	0.0650922	0.0655769	0.0665758	0.0665758
10	Geobacillus stearothermophilis esterase	0	0.0115902	0.0210792	0.025	0.0198578	0.0192959	0.022301	0.0238118	0.0230723	0.0230723	0.0226789	0.0232451	0.0238118	0.0247588	0.0253246	0.0258908	0.0262742	0.026839	0.0266646	0.0274044	0.0274044	0.0277909	0.0277909	0.0283549	0.028746	0.0289194	0.0293087	0.0294845	0.0291433	0.0298719	0.0298719	0.0293087	0.0297041	0.0298719	0.0298719	0.0302655	0.0298719	0.03005	0.0298719	0.0298719	0.0294845	0.0298719	0.0298719	0.0293087	0.0293087	0.0294845	0.0293087	0.0291033
11	Bacillus subilis esterase	0	0.0155027	0.044238	0.0481698	0.0449704	0.0560922	0.0587906	0.0635164	0.0630106	0.0631057	0.0635164	0.0628517	0.0632561	0.06245	0.0628517	0.0631057	0.0632561	0.0632561	0.0628517	0.0609289	0.0597439	0.0591523	0.0585861	0.0572626	0.0567215	0.0562168	0.0556447	0.0552932	0.0551755	0.0540278	0.0539259	0.0535942	0.0535195	0.0529434	0.0528867	0.053426	0.0522717	0.0525769	0.0522717	0.0519711	0.0531256	0.0539846	0.0542709	0.0548483	0.0548483	0.0551392	0.0680906	0.067951
	MasterMix+BHET (G04)	0	0.0117189	0.0110604	0.0109697	0.0143643	0.0166233	0.0185023	0.0210317	0.0231157	0.0215484	0.0231805	0.0253246	0.025865	0.0274955	0.0276104	0.0287112	0.0292632	0.0309246	0.0310698	0.0318957	0.0330051	0.0341174	0.0345302	0.0361985	0.0366106	0.037027	0.0381357	0.038553	0.0391067	0.0391067	0.040501	0.0409268	0.0413562	0.0416053	0.0424539	0.042336	0.0428836	0.0428836	0.0428836	0.0432088	0.0432088	0.0427707	0.0426654	0.0435546	0.0420278	0.0421228	0.0420278	0.0420278
	MaserMix No BHET	0	0.0110151	0.0130512	0.0140119	0.0140119	0.0145029	0.015	0.0150111	0.0160104	0.0150111	0.0150444	0.0155242	0.0155242	0.0150111	0.0150111	0.0155242	0.0150444	0.0155242	0.0155671	0.0155242	0.0160416	0.0155242	0.0150444	0.0155242	0.0150444	0.0150444	0.0150444	0.0155671	0.0155027	0.0155027	0.0150444	0.0150111	0.0150111	0.0150444	0.0155027	0.0150444	0.0150111	0.0140119	0.0150111	0.0145258	0.0145258	0.0140119	0.0155027	0.0150111	0.0145258	0.0150111	0.0145258	0.0140475
Experimental Replicate 1
	Hours	0	0.25	0.5	0.75	1	1.25	1.5	1.75	2	2.25	2.5	2.75	3	3.25	3.5	3.75	4	4.25	4.5	4.75	5	5.25	5.5	5.75	6	6.25	6.5	6.75	7	7.25	7.5	7.75	8	8.25	8.5	8.75	9	9.25	9.5	9.75	10	10.25	10.5	10.75	11	11.25	11.5	11.75
1	T. fusca cutinase	0	0.0241316	0.0181475	0.0187705	0.0197315	0.019218	0.0205994	0.0215019	0.0246374	0.0225167	0.0235443	0.0245425	0.0235018	0.0240069	0.0245017	0.0250067	0.0260256	0.0255147	0.0265141	0.0260064	0.0265141	0.0260256	0.0265141	0.0260576	0.0265141	0.0260064	0.0260256	0.0260256	0.0255147	0.0260256	0.0255408	0.0255147	0.0250267	0.0250267	0.0250067	0.0255408	0.0250267	0.0250267	0.0250267	0.0250267	0.0250267	0.0245425	0.0250599	0.0245425	0.0250599	0.0245425	0.0245425	0.0250267
2	I. sakiensis PETase	0	0.003	0.00472582	0.00776745	0.0070946	0.00702377	0.00655744	0.00556776	0.00702377	0.0072111	0.00750555	0.0106927	0.0117898	0.0133167	0.0121244	0.0149778	0.0158745	0.0157162	0.0180093	0.0185831	0.0188237	0.0199249	0.0202073	0.0196299	0.0205508	0.0208806	0.020306	0.0206478	0.021	0.0215716	0.0217332	0.0217332	0.0217332	0.0221133	0.0226789	0.0226789	0.0232451	0.0230651	0.0236291	0.0236291	0.0238118	0.0241937	0.0241937	0.024379	0.024379	0.024379	0.0238118	0.024379
10	Geobacillus stearothermophilis esterase	0	0.0399291	0.0457384	0.0291433	0.0355575	0.0373631	0.0347707	0.0306105	0.03	0.03005	0.0296704	0.0292803	0.0293655	0.0300056	0.0301164	0.0301164	0.0298161	0.0298161	0.0303699	0.0305123	0.0306649	0.0306649	0.0302655	0.0302655	0.0304357	0.0302655	0.0304357	0.0306159	0.0306159	0.0306159	0.0306159	0.0306159	0.0308058	0.0306159	0.0308058	0.0311823	0.0308058	0.0308058	0.0308058	0.0313741	0.0313741	0.0315753	0.0315753	0.0315753	0.0319427	0.0319427	0.0319427	0.0321455
11	Bacillus subilis esterase	0	0.019975	0.015308	0.0296704	0.028	0.0380832	0.0461628	0.0457202	0.0464363	0.0462313	0.0467582	0.0471734	0.0485695	0.0500533	0.0515202	0.0520513	0.0530503	0.0530786	0.0536315	0.0526783	0.0512087	0.0502129	0.049689	0.0487476	0.0482804	0.0479618	0.0475079	0.0470567	0.0466083	0.0462637	0.0457202	0.0447363	0.0447363	0.0436501	0.0436501	0.0426654	0.0426654	0.0426654	0.0421228	0.0421228	0.0415812	0.0410406	0.0410406	0.0410406	0.0405956	0.0410406	0.040501	0.0400541
	MasterMix+BHET	0	0.0188237	0.0236925	0.0126623	0.0090185	0.0107858	0.00960902	0.0101489	0.00960902	0.0105987	0.0115902	0.0120554	0.0115902	0.0163707	0.0170587	0.0165025	0.0169214	0.0169214	0.0176163	0.0163707	0.0170587	0.0196723	0.0169214	0.0191398	0.0169214	0.0169214	0.0168028	0.0165025	0.0163707	0.0163707	0.0165025	0.0163707	0.0159478	0.0163707	0.0159478	0.0165025	0.0152753	0.0153948	0.0163707	0.0159478	0.0160935	0.0159478	0.0159478	0.0158219	0.0159478	0.0163707	0.0159478	0.0155349
	MaserMix No BHET	0	0.100421	0.0818352	0.0783411	0.0791223	0.0791223	0.079925	0.0793872	0.0789367	0.0786787	0.0790274	0.0789367	0.0794754	0.0789367	0.079925	0.0793872	0.0793872	0.0793032	0.079758	0.0787676	0.0793032	0.0793032	0.0793032	0.0792233	0.079758	0.079758	0.0796806	0.0806722	0.0802143	0.0801395	0.0807486	0.0812055	0.0806722	0.0812055	0.0812055	0.0812055	0.0812055	0.0812055	0.0822739	0.0811316	0.0811316	0.0816639	0.0815925	0.0816639	0.0821239	0.0816639	0.0816639	0.0812055
	Average
	Hours	0	0.25	0.5	0.75	1	1.25	1.5	1.75	2	2.25	2.5	2.75	3	3.25	3.5	3.75	4	4.25	4.5	4.75	5	5.25	5.5	5.75	6	6.25	6.5	6.75	7	7.25	7.5	7.75	8	8.25	8.5	8.75	9	9.25	9.5	9.75	10	10.25	10.5	10.75	11	11.25	11.5	11.75
1	T. fusca cutinase	0	0.0211396	0.0201455	0.0204004	0.0193042	0.0182162	0.0177663	0.0174778	0.0190331	0.0182046	0.0179837	0.0198431	0.0192731	0.0194028	0.019773	0.0207647	0.0211573	0.0207937	0.021478	0.0213299	0.0215837	0.0210596	0.0214424	0.0214895	0.0214424	0.0214046	0.0216345	0.0218587	0.0213354	0.021821	0.0215785	0.0215371	0.0213215	0.0210573	0.0210473	0.0215501	0.0210329	0.021293	0.021293	0.0210329	0.021293	0.0207908	0.0212907	0.021051	0.0210495	0.021051	0.0207908	0.0210329
2	I. sakiensis PETase	0	0.00672015	0.0163659	0.0232508	0.024356	0.0247663	0.0245684	0.0236645	0.0257099	0.0261721	0.0267546	0.0297236	0.0294869	0.0299303	0.0303572	0.0313059	0.0308992	0.0307127	0.0330947	0.0324702	0.0321843	0.0332075	0.0331688	0.0327133	0.0333748	0.0342258	0.0341443	0.034667	0.0353311	0.0357725	0.0365619	0.0367316	0.0372247	0.0383162	0.038599	0.0393231	0.0402989	0.0406759	0.0414554	0.0419268	0.042732	0.0434031	0.0436444	0.044494	0.0447356	0.0449779	0.0451938	0.0454774
10	Geobacillus stearothermophilis esterase	0	0.0257597	0.0334088	0.0270717	0.0277076	0.0283295	0.0285358	0.0272111	0.0265362	0.0265612	0.0261747	0.0262627	0.0265886	0.0273822	0.0277205	0.0280036	0.0280451	0.0283276	0.0285173	0.0289583	0.0290346	0.0292279	0.0290282	0.0293102	0.0295909	0.0295925	0.0298722	0.0300502	0.0298796	0.0302439	0.0302439	0.0299623	0.030255	0.0302439	0.0303389	0.0307239	0.0303389	0.0304279	0.0303389	0.030623	0.0304293	0.0307236	0.0307236	0.030442	0.0306257	0.0307136	0.0306257	0.0306244
11	Bacillus subilis esterase	0	0.0177388	0.029773	0.0389201	0.0364852	0.0470877	0.0524767	0.0546183	0.0547235	0.0546685	0.0551373	0.0550126	0.0559128	0.0562516	0.0571859	0.0575785	0.0581532	0.0581673	0.0582416	0.0568036	0.0554763	0.0546826	0.0541376	0.0530051	0.052501	0.0520893	0.0515763	0.0511749	0.0508919	0.0501458	0.049823	0.0491652	0.0491279	0.0482967	0.0482684	0.0480457	0.0474685	0.0476211	0.0471973	0.047047	0.0473534	0.0475126	0.0476558	0.0479445	0.0477219	0.0480899	0.0542958	0.0540025
	MasterMix+BHET	0	0.0152713	0.0173765	0.011816	0.0116914	0.0137045	0.0140556	0.0155903	0.0163623	0.0160736	0.0173853	0.01869	0.0187276	0.0219331	0.0223346	0.0226069	0.0230923	0.023923	0.024343	0.0241332	0.0250319	0.0268949	0.0257258	0.0276692	0.026766	0.0269742	0.0274693	0.0275278	0.0277387	0.0277387	0.0285018	0.0286487	0.028652	0.028988	0.0292009	0.0294192	0.0290794	0.0291392	0.0296271	0.0295783	0.0296511	0.0293593	0.0293066	0.0296882	0.0289878	0.0292468	0.0289878	0.0287813
	MaserMix No BHET	0	0.055718	0.0474432	0.0461765	0.0465671	0.0468126	0.0474625	0.0471992	0.0474735	0.0468449	0.0470359	0.0472304	0.0474998	0.0469739	0.047468	0.0474557	0.0472158	0.0474137	0.0476625	0.0471459	0.0476724	0.0474137	0.0471738	0.0473737	0.0474012	0.0474012	0.0473625	0.0481196	0.0478585	0.0478211	0.0478965	0.0481083	0.0478416	0.0481249	0.0483541	0.0481249	0.0481083	0.0476087	0.0486425	0.0478287	0.0478287	0.0478379	0.0485476	0.0483375	0.0483249	0.0483375	0.0480949	0.0476265
[truncated: 78 more columns]

## Sheet: StDev mM
	STDEV of ∆ABS
Experimetnal Replicate 1
	Hours	0	0.25	0.5	0.75	1	1.25	1.5	1.75	2	2.25	2.5	2.75	3	3.25	3.5	3.75	4	4.25	4.5	4.75	5	5.25	5.5	5.75	6	6.25	6.5	6.75	7	7.25	7.5	7.75	8	8.25	8.5	8.75	9	9.25	9.5	9.75	10	10.25	10.5	10.75	11	11.25	11.5	11.75
1	T. fusca cutinase	0	0.0312355	0.0381133	0.0379184	0.0324907	0.0296293	0.0257029	0.0231563	0.0231136	0.0239116	0.0213826	0.0260654	0.0258943	0.0254714	0.0258943	0.0284388	0.0280367	0.0276644	0.0282996	0.0286636	0.0286636	0.0277	0.0281772	0.029125	0.0281772	0.0289209	0.0296792	0.0304511	0.0295291	0.0303211	0.0303211	0.0302232	0.0303211	0.0294118	0.0294118	0.0302232	0.0293278	0.0302232	0.0302232	0.0293278	0.0302232	0.0293278	0.0301578	0.0302232	0.0293278	0.0302232	0.0293278	0.0293278
2	I. sakiensis PETase	0	0.0179698	0.0482037	0.0666691	0.0716316	0.073166	0.0732874	0.0718793	0.0764141	0.077683	0.0791813	0.083916	0.081213	0.0801112	0.0836331	0.0819875	0.079044	0.0786746	0.0829276	0.07979	0.0783916	0.0800187	0.0793992	0.078825	0.0795173	0.081879	0.0825875	0.0837983	0.0854784	0.0860139	0.0884534	0.0890376	0.090735	0.0938381	0.0938381	0.0963306	0.0987153	0.100323	0.102036	0.103658	0.106116	0.107769	0.108599	0.111205	0.112037	0.112871	0.11459	0.11459
10	Geobacillus stearothermophilis esterase	0	0.0199491	0.0362815	0.0430299	0.0341792	0.0332121	0.0383844	0.0409847	0.039712	0.039712	0.0390349	0.0400093	0.0409847	0.0426148	0.0435885	0.0445631	0.045223	0.0461952	0.045895	0.0471683	0.0471683	0.0478336	0.0478336	0.0488043	0.0494775	0.049776	0.050446	0.0507485	0.0501614	0.0514155	0.0514155	0.050446	0.0511266	0.0514155	0.0514155	0.0520929	0.0514155	0.0517219	0.0514155	0.0514155	0.0507485	0.0514155	0.0514155	0.050446	0.050446	0.0507485	0.050446	0.0500924
11	Bacillus subilis esterase	0	0.0266832	0.0761423	0.0829098	0.0774028	0.0965457	0.10119	0.109324	0.108454	0.108617	0.109324	0.10818	0.108876	0.107489	0.10818	0.108617	0.108876	0.108876	0.10818	0.104871	0.102831	0.101813	0.100838	0.0985601	0.0976289	0.0967602	0.0957755	0.0951704	0.0949678	0.0929924	0.092817	0.0922461	0.0921175	0.0911259	0.0910283	0.0919566	0.0899699	0.0904952	0.0899699	0.0894525	0.0914397	0.092918	0.0934109	0.0944047	0.0944047	0.0949054	0.117197	0.116957
	MasterMix+BHET	0	0.0201706	0.0190372	0.0188809	0.0247238	0.0286119	0.031846	0.0361997	0.0397866	0.037089	0.0398981	0.0435885	0.0445188	0.0473251	0.0475229	0.0494176	0.0503677	0.0532274	0.0534773	0.0548987	0.0568082	0.0587228	0.0594332	0.0623048	0.063014	0.0637308	0.0656391	0.0663573	0.0673103	0.0673103	0.0697102	0.070443	0.0711821	0.0716109	0.0730715	0.0728685	0.073811	0.073811	0.073811	0.0743708	0.0743708	0.0736168	0.0734355	0.074966	0.072338	0.0725017	0.072338	0.072338
	MaserMix No BHET	0	0.0189592	0.0224636	0.0241172	0.0241172	0.0249623	0.0258179	0.0258371	0.0275571	0.0258371	0.0258943	0.0267202	0.0267202	0.0258371	0.0258371	0.0267202	0.0258943	0.0267202	0.026794	0.0267202	0.0276108	0.0267202	0.0258943	0.0267202	0.0258943	0.0258943	0.0258943	0.026794	0.0266832	0.0266832	0.0258943	0.0258371	0.0258371	0.0258943	0.0266832	0.0258943	0.0258371	0.0241172	0.0258371	0.0250018	0.0250018	0.0241172	0.0266832	0.0258371	0.0250018	0.0258371	0.0250018	0.0241786
Experimetnal Replicate 2
	Hours	0	0.25	0.5	0.75	1	1.25	1.5	1.75	2	2.25	2.5	2.75	3	3.25	3.5	3.75	4	4.25	4.5	4.75	5	5.25	5.5	5.75	6	6.25	6.5	6.75	7	7.25	7.5	7.75	8	8.25	8.5	8.75	9	9.25	9.5	9.75	10	10.25	10.5	10.75	11	11.25	11.5	11.75
1	T. fusca cutinase	0	0.0415352	0.0312355	0.0323078	0.0339618	0.033078	0.0354555	0.0370091	0.0424058	0.0387556	0.0405243	0.0422424	0.0404512	0.0413207	0.0421722	0.0430414	0.0447952	0.0439158	0.0456361	0.0447621	0.0456361	0.0447952	0.0456361	0.0448503	0.0456361	0.0447621	0.0447952	0.0447952	0.0439158	0.0447952	0.0439608	0.0439158	0.0430758	0.0430758	0.0430414	0.0439608	0.0430758	0.0430758	0.0430758	0.0430758	0.0430758	0.0422424	0.0431331	0.0422424	0.0431331	0.0422424	0.0422424	0.0430758
2	I. sakiensis PETase	0	0.00516359	0.00813406	0.0133693	0.0122112	0.0120893	0.0112866	0.00958322	0.0120893	0.0124117	0.0129185	0.0184042	0.0202926	0.0229206	0.0208684	0.0257797	0.0273231	0.0270507	0.0309975	0.0319852	0.0323994	0.0342946	0.0347807	0.0337869	0.0353719	0.0359396	0.0349506	0.035539	0.0361451	0.0371289	0.0374072	0.0374072	0.0374072	0.0380614	0.0390349	0.0390349	0.0400093	0.0396996	0.0406703	0.0406703	0.0409847	0.041642	0.041642	0.041961	0.041961	0.041961	0.0409847	0.041961
10	Geobacillus stearothermophilis esterase	0	0.0687258	0.0787247	0.0501614	0.0612014	0.0643092	0.0598472	0.0526866	0.0516359	0.0517219	0.0510686	0.0503971	0.0505438	0.0516455	0.0518363	0.0518363	0.0513194	0.0513194	0.0522726	0.0525176	0.0527802	0.0527802	0.0520929	0.0520929	0.0523859	0.0520929	0.0523859	0.052696	0.052696	0.052696	0.052696	0.052696	0.0530229	0.052696	0.0530229	0.0536708	0.0530229	0.0530229	0.0530229	0.054001	0.054001	0.0543473	0.0543473	0.0543473	0.0549796	0.0549796	0.0549796	0.0553287
11	Bacillus subilis esterase	0	0.0343809	0.026348	0.0510686	0.0481935	0.0655487	0.0794552	0.0786934	0.0799261	0.0795731	0.0804801	0.0811948	0.0835977	0.0861516	0.0886764	0.0895904	0.09131	0.0913586	0.0923103	0.0906696	0.0881403	0.0864262	0.0855246	0.0839043	0.0831001	0.0825517	0.0817704	0.0809938	0.080222	0.079629	0.0786934	0.0769999	0.0769999	0.0751304	0.0751304	0.0734355	0.0734355	0.0734355	0.0725017	0.0725017	0.0715695	0.070639	0.070639	0.070639	0.0698729	0.070639	0.0697102	0.068941
	MasterMix+BHET	0	0.0323994	0.0407794	0.0217943	0.0155226	0.0185645	0.016539	0.0174682	0.016539	0.0182425	0.0199491	0.0207498	0.0199491	0.0281772	0.0293614	0.0284041	0.029125	0.029125	0.0303211	0.0281772	0.0293614	0.0338599	0.029125	0.0329434	0.029125	0.029125	0.0289209	0.0284041	0.0281772	0.0281772	0.0284041	0.0281772	0.0274493	0.0281772	0.0274493	0.0284041	0.0262917	0.0264975	0.0281772	0.0274493	0.0277	0.0274493	0.0274493	0.0272326	0.0274493	0.0281772	0.0274493	0.0267386
	MaserMix No BHET	0	0.172844	0.140854	0.13484	0.136185	0.136185	0.137567	0.136641	0.135866	0.135421	0.136022	0.135866	0.136793	0.135866	0.137567	0.136641	0.136641	0.136496	0.137279	0.135574	0.136496	0.136496	0.136496	0.136359	0.137279	0.137279	0.137146	0.138853	0.138065	0.137936	0.138984	0.139771	0.138853	0.139771	0.139771	0.139771	0.139771	0.139771	0.14161	0.139643	0.139643	0.14056	0.140437	0.14056	0.141351	0.14056	0.14056	0.139771
	Average
	Hours	0	0.25	0.5	0.75	1	1.25	1.5	1.75	2	2.25	2.5	2.75	3	3.25	3.5	3.75	4	4.25	4.5	4.75	5	5.25	5.5	5.75	6	6.25	6.5	6.75	7	7.25	7.5	7.75	8	8.25	8.5	8.75	9	9.25	9.5	9.75	10	10.25	10.5	10.75	11	11.25	11.5	11.75
1	T. fusca cutinase	0	0.0363853	0.0346744	0.0351131	0.0332263	0.0313536	0.0305792	0.0300827	0.0327597	0.0313336	0.0309535	0.0341539	0.0331727	0.033396	0.0340333	0.0357401	0.0364159	0.0357901	0.0369678	0.0367129	0.0371499	0.0362476	0.0369066	0.0369877	0.0369066	0.0368415	0.0372372	0.0376231	0.0367225	0.0375581	0.0371409	0.0370695	0.0366984	0.0362438	0.0362266	0.037092	0.0362018	0.0366495	0.0366495	0.0362018	0.0366495	0.0357851	0.0366454	0.0362328	0.0362304	0.0362328	0.0357851	0.0362018
2	I. sakiensis PETase	0	0.0115667	0.0281689	0.0400192	0.0419214	0.0426277	0.042287	0.0407312	0.0442517	0.0450474	0.0460499	0.0511601	0.0507528	0.0515159	0.0522508	0.0538836	0.0531836	0.0528626	0.0569625	0.0558876	0.0553955	0.0571566	0.0570899	0.056306	0.0574446	0.0589093	0.0587691	0.0596686	0.0608118	0.0615714	0.0629303	0.0632224	0.0640711	0.0659498	0.0664365	0.0676828	0.0693623	0.0700112	0.071353	0.0721643	0.0735502	0.0747053	0.0751206	0.0765829	0.0769987	0.0774159	0.0777873	0.0782755
10	Geobacillus stearothermophilis esterase	0	0.0443374	0.0575031	0.0465956	0.0476903	0.0487607	0.0491158	0.0468357	0.045674	0.045717	0.0450517	0.0452032	0.0457643	0.0471301	0.0477124	0.0481997	0.0482712	0.0487573	0.0490838	0.049843	0.0499743	0.0503069	0.0499632	0.0504486	0.0509317	0.0509344	0.0514159	0.0517223	0.0514287	0.0520557	0.0520557	0.051571	0.0520747	0.0520557	0.0522192	0.0528818	0.0522192	0.0523724	0.0522192	0.0527082	0.0523748	0.0528814	0.0528814	0.0523967	0.0527128	0.0528641	0.0527128	0.0527106
11	Bacillus subilis esterase	0	0.030532	0.0512451	0.0669892	0.0627982	0.0810472	0.0903227	0.0940088	0.0941898	0.0940953	0.0949022	0.0946874	0.0962369	0.0968201	0.0984282	0.0991039	0.100093	0.100117	0.100245	0.0977701	0.0954856	0.0941195	0.0931814	0.0912322	0.0903645	0.0896559	0.0887729	0.0880821	0.0875949	0.0863107	0.0857552	0.084623	0.0845587	0.0831282	0.0830794	0.082696	0.0817027	0.0819653	0.0812358	0.0809771	0.0815046	0.0817785	0.082025	0.0825218	0.0821388	0.0827722	0.0934538	0.092949
	MasterMix+BHET	0	0.026285	0.0299083	0.0203376	0.0201232	0.0235882	0.0241925	0.026834	0.0281628	0.0276658	0.0299236	0.0321691	0.0322339	0.0377511	0.0384422	0.0389109	0.0397463	0.0411762	0.0418992	0.0415379	0.0430848	0.0462914	0.0442791	0.0476241	0.0460695	0.0464279	0.04728	0.0473807	0.0477437	0.0477437	0.0490572	0.0493101	0.0493157	0.049894	0.0502604	0.0506363	0.0500514	0.0501543	0.0509941	0.0509101	0.0510354	0.0505331	0.0504424	0.0510993	0.0498937	0.0503394	0.0498937	0.0495383
	MaserMix No BHET	0	0.0959016	0.081659	0.0794789	0.0801511	0.0805736	0.0816923	0.081239	0.0817113	0.0806293	0.080958	0.0812928	0.0817564	0.0808513	0.0817018	0.0816806	0.0812677	0.0816083	0.0820365	0.0811473	0.0820536	0.0816083	0.0811954	0.0815395	0.0815867	0.0815867	0.0815202	0.0828233	0.0823739	0.0823095	0.0824392	0.0828038	0.0823449	0.0828325	0.0832269	0.0828325	0.0828038	0.0819439	0.0837233	0.0823226	0.0823226	0.0823385	0.0835599	0.0831984	0.0831766	0.0831984	0.0827808	0.0819746
[truncated: 49 more columns]

## Sheet: Specific Activity
Enzyme Number	Enzyme Name	mM ester cleaved per minute	µM ester cleaved per minute		Enzyme Number	Enzyme Name	µM cleaved per minute per µMenzyme
1	T. fusca cutinase	0.029532	29.532		1	T. fusca cutinase	1.4766
2	I. sakiensis PETase	0.030749	30.749		2	I. sakiensis PETase	1.53745
13	Geobacillus stearothermophilis esterase	0.039651	39.651		10	Geobacillus stearothermophilis esterase	1.98255
14	Bacillus subilis esterase	0.030795	30.795		11	Bacillus subilis esterase	1.53975
	MasterMix+BHET	0.012716	12.716			MasterMix+BHET	0.6358

## Sheet: TTON
Enzyme Number	Enzyme Name
1	T. fusca cutinase	17.9467		BHET
2	I. sakiensis PETase	13.6364		0.001	mol	0.0002	L	2e-07	mol	0.2	µmol	10	µmol BHET per µmol enzyme
10	Geobacillus stearothermophilis esterase	22.5485			L
11	Bacillus subilis esterase	14.7759
	MasterMix+BHET	10.0429		Enzyme
				0.0001	mol	0.0002	L	2e-08	mol
					L			0.02	µmol
