# Supplementary material for: A flexible kinetic assay efficiently sorts prospective biocatalysts for PET plastic subunit hydrolysis
Source: RSC Adv. 2022 Mar 14;12(13):8119–30. doi: 10.1039/d2ra00612j (PMC8982334; doi:10.1039/d2ra00612j)
Supplement: RA-012-D2RA00612J-s004 [file RA-012-D2RA00612J-s004.xlsx]

## Sheet: Abs550
	avg. time [s]	0	899.99	1799.99	2699.99	3599.99	4499.99	5399.99	6299.99	7199.99	8099.99	8999.99	9899.99	10800	11700	12600	13500	14400	15300	16200	17100	18000	18900	19800	20700	21600	22500	23400	24300	25200	26100	27000	27900	28800	29700	30600	31500	32400	33300	34200	35100	36000	36900	37800	38700	39600	40500	41400	42300
	Time (min)	0	14.9998	29.9998	44.9998	59.9998	74.9998	89.9998	105	120	135	150	165	180	195	210	225	240	255	270	285	300	315	330	345	360	375	390	405	420	435	450	465	480	495	510	525	540	555	570	585	600	615	630	645	660	675	690	705
1	T. fusca cutinase	0.765033	0.6722	0.4734	0.4603	0.4547	0.4547	0.4494	0.4493	0.4452	0.4468	0.44	0.4389	0.4373	0.4375	0.4337	0.4341	0.4315	0.4328	0.4288	0.4304	0.4273	0.4291	0.4254	0.4274	0.4239	0.4265	0.4227	0.4243	0.4212	0.4232	0.4204	0.422	0.4191	0.4211	0.4184	0.4202	0.4167	0.4188	0.4161	0.4182	0.4154	0.4176	0.4143	0.4163	0.4136	0.4155	0.4129	0.4149
1	T. fusca cutinase	0.765033	0.6777	0.4818	0.4657	0.4621	0.4643	0.4597	0.4606	0.4591	0.4608	0.4592	0.4557	0.456	0.4571	0.4549	0.4533	0.4514	0.4521	0.4499	0.4497	0.4491	0.448	0.4467	0.4466	0.4456	0.4455	0.444	0.4436	0.4429	0.4424	0.4417	0.4415	0.4405	0.4405	0.4394	0.4396	0.4383	0.4384	0.4378	0.4376	0.4366	0.4369	0.4357	0.4357	0.435	0.4351	0.4343	0.4343
1	T. fusca cutinase	0.765033	0.6795	0.4851	0.4695	0.4642	0.4668	0.4627	0.4632	0.4607	0.4612	0.4583	0.4605	0.4555	0.4565	0.4533	0.4561	0.4538	0.4525	0.4492	0.4498	0.4468	0.448	0.4444	0.4462	0.4439	0.4449	0.4419	0.443	0.4399	0.4416	0.439	0.4404	0.4376	0.4392	0.4369	0.4382	0.4351	0.4371	0.4345	0.436	0.4335	0.435	0.4326	0.434	0.4318	0.4333	0.431	0.4327
2	I. sakiensis PETase	0.765033	0.5717	0.4739	0.5345	0.5659	0.5854	0.5763	0.5603	0.5583	0.548	0.5332	0.5261	0.5217	0.5184	0.513	0.5138	0.5082	0.5112	0.5051	0.5094	0.5031	0.508	0.5028	0.5076	0.5021	0.5082	0.5018	0.5071	0.5025	0.5067	0.5027	0.5079	0.5048	0.5111	0.5061	0.5097	0.5049	0.5091	0.5057	0.5103	0.5054	0.5112	0.505	0.5102	0.5048	0.5104	0.5046	0.5101
2	I. sakiensis PETase	0.765033	0.5761	0.4763	0.5143	0.5649	0.5618	0.5409	0.5372	0.5155	0.5136	0.4996	0.4881	0.4856	0.4786	0.4742	0.4712	0.47	0.4681	0.468	0.4667	0.4663	0.4656	0.4658	0.4655	0.4654	0.4656	0.4648	0.4647	0.4644	0.4648	0.4644	0.4669	0.4668	0.4693	0.4686	0.4711	0.4705	0.4728	0.472	0.4753	0.4745	0.4771	0.4775	0.4784	0.4788	0.4789	0.4806	0.4805
10	Geobacillus stearothermophilis esterase	0.765033	0.7207	0.5888	0.5186	0.4774	0.4588	0.4426	0.433	0.4225	0.4166	0.4084	0.4038	0.3973	0.394	0.3878	0.3849	0.3801	0.3778	0.3732	0.3715	0.3676	0.366	0.3627	0.3613	0.3583	0.3578	0.354	0.3535	0.351	0.3503	0.348	0.3472	0.3451	0.3453	0.3429	0.3429	0.3408	0.3408	0.3391	0.3392	0.3375	0.3376	0.3359	0.3361	0.3349	0.3353	0.3342	0.3343
10	Geobacillus stearothermophilis esterase	0.765033	0.7159	0.584	0.5162	0.4762	0.4578	0.442	0.4325	0.422	0.4162	0.4082	0.4037	0.3974	0.3939	0.3882	0.3855	0.3806	0.3783	0.3741	0.3721	0.3681	0.3671	0.3633	0.3625	0.3594	0.3587	0.3552	0.355	0.3522	0.3516	0.3496	0.3493	0.3472	0.3471	0.3447	0.345	0.3428	0.3431	0.3412	0.3418	0.34	0.3401	0.3385	0.3391	0.3375	0.3381	0.3365	0.3372
10	Geobacillus stearothermophilis esterase	0.765033	0.7539	0.6191	0.5462	0.5039	0.4833	0.4661	0.4553	0.4446	0.4376	0.4296	0.4244	0.4176	0.4136	0.4077	0.4047	0.3994	0.397	0.3923	0.3904	0.3863	0.3844	0.381	0.3795	0.3764	0.3754	0.3721	0.3713	0.3685	0.368	0.3655	0.3651	0.363	0.3626	0.3605	0.3604	0.3583	0.3581	0.3565	0.3565	0.355	0.3551	0.3532	0.3535	0.3521	0.3524	0.3511	0.3514
11	Bacillus subilis esterase	0.765033	0.7253	0.6659	0.6338	0.6062	0.5824	0.5647	0.5567	0.5468	0.5462	0.5377	0.5374	0.5293	0.5339	0.5262	0.5307	0.5258	0.5278	0.5222	0.5275	0.5212	0.5261	0.5205	0.524	0.5189	0.5234	0.5175	0.5211	0.5167	0.521	0.5157	0.5203	0.5151	0.5184	0.5138	0.5177	0.5133	0.5171	0.5126	0.5172	0.5123	0.5156	0.5118	0.5142	0.5105	0.5151	0.5106	0.5145
11	Bacillus subilis esterase	0.765033	0.7016	0.6453	0.6161	0.5894	0.5678	0.5562	0.5482	0.5416	0.531	0.5282	0.5185	0.5342	0.5146	0.5196	0.5074	0.5199	0.5082	0.5126	0.5018	0.5144	0.5019	0.5096	0.4993	0.5117	0.4967	0.5097	0.4973	0.5089	0.4961	0.5092	0.4947	0.5075	0.4951	0.5068	0.4959	0.5075	0.496	0.5078	0.4954	0.508	0.4955	0.5073	0.4951	0.5067	0.4949	0.5072	0.4958
11	Bacillus subilis esterase	0.765033	0.7209	0.6541	0.6274	0.6006	0.5774	0.569	0.5526	0.5414	0.5279	0.5248	0.5205	0.5162	0.514	0.5121	0.5094	0.5079	0.5071	0.5066	0.5052	0.5057	0.5046	0.5044	0.5031	0.5039	0.5024	0.5025	0.5009	0.5015	0.4998	0.5003	0.4989	0.4998	0.4978	0.4984	0.4968	0.4978	0.4958	0.4965	0.4962	0.4968	0.4957	0.4969	0.4959	0.4964	0.4957	0.4966	0.4957
	MasterMix+BHET (G04)	0.765033	0.7659	0.7129	0.7034	0.699	0.6952	0.6947	0.6935	0.692	0.6914	0.6883	0.6947	0.6883	0.6963	0.6873	0.7058	0.6854	0.6891	0.6892	0.6872	0.6861	0.6911	0.6931	0.6883	0.6931	0.6837	0.6849	0.6803	0.6812	0.7071	0.7081	0.7014	0.7033	0.6969	0.6973	0.6919	0.6918	0.6865	0.6872	0.682	0.6828	0.6779	0.6778	0.6725	0.6727	0.6685	0.6677	0.6643
	MasterMix+BHET (G05)	0.765033	0.7604	0.7096	0.6968	0.6926	0.692	0.6909	0.6917	0.6999	0.6924	0.6967	0.695	0.6978	0.6985	0.6982	0.6989	0.6981	0.696	0.697	0.6934	0.6909	0.6912	0.6944	0.6903	0.6962	0.6863	0.6856	0.6971	0.6836	0.6801	0.6788	0.6751	0.682	0.6754	0.6714	0.6701	0.6704	0.6668	0.664	0.663	0.66	0.6578	0.6567	0.6536	0.6526	0.6506	0.6492	0.648
	MasterMix+BHET (G06)	0.765033	0.7688	0.7175	0.7008	0.6962	0.6933	0.6928	0.6929	0.6897	0.6988	0.6972	0.6988	0.705	0.7101	0.7074	0.7124	0.7159	0.7653	0.7726	0.7659	0.7705	0.7618	0.7645	0.7572	0.7601	0.7517	0.7519	0.7463	0.7453	0.7377	0.7409	0.7323	0.736	0.7285	0.73	0.723	0.7225	0.7145	0.7143	0.7072	0.7073	0.7012	0.699	0.6926	0.6916	0.6854	0.6849	0.6792
	MaserMix No BHET	0.765033	0.7227	0.6744	0.663	0.6606	0.6603	0.6601	0.66	0.6598	0.6601	0.66	0.6602	0.6597	0.6596	0.6593	0.6596	0.6593	0.6593	0.6591	0.6592	0.6589	0.659	0.6585	0.659	0.6586	0.659	0.6584	0.6583	0.6581	0.6585	0.6582	0.6582	0.6579	0.658	0.6578	0.658	0.6575	0.6579	0.6575	0.6576	0.6573	0.6575	0.6572	0.6571	0.6571	0.6573	0.6571	0.6571
	MaserMix No BHET	0.765033	0.7833	0.7292	0.7169	0.7139	0.7136	0.7129	0.7128	0.7125	0.7128	0.7125	0.7125	0.7121	0.7123	0.7118	0.7118	0.7116	0.7117	0.7116	0.7115	0.7114	0.7114	0.711	0.7114	0.7112	0.7112	0.7108	0.7109	0.7105	0.7109	0.7107	0.7104	0.7104	0.7108	0.7102	0.7103	0.7098	0.71	0.71	0.7099	0.7096	0.7096	0.7094	0.7097	0.7095	0.7098	0.7095	0.7094
	MaserMix No BHET	0.765033	0.7625	0.7036	0.6928	0.6909	0.6907	0.6906	0.6906	0.6904	0.6906	0.6904	0.6904	0.6901	0.6904	0.69	0.69	0.6896	0.6898	0.6898	0.6898	0.6898	0.6898	0.6896	0.6897	0.6896	0.6899	0.6893	0.689	0.6892	0.6893	0.6891	0.6891	0.6891	0.6892	0.6886	0.6887	0.6886	0.6887	0.6889	0.689	0.6885	0.6886	0.6882	0.6884	0.6887	0.6884	0.6883	0.6884
	avg. time [s]	0	899.99	1799.99	2699.99	3599.99	4499.99	5399.99	6299.99	7199.99	8099.99	8999.99	9899.99	10800	11700	12600	13500	14400	15300	16200	17100	18000	18900	19800	20700	21600	22500	23400	24300	25200	26100	27000	27900	28800	29700	30600	31500	32400	33300	34200	35100	36000	36900	37800	38700	39600	40500	41400	42300
	Time (min)	0	14.9998	29.9998	44.9998	59.9998	74.9998	89.9998	105	120	135	150	165	180	195	210	225	240	255	270	285	300	315	330	345	360	375	390	405	420	435	450	465	480	495	510	525	540	555	570	585	600	615	630	645	660	675	690	705
	Time (min)	0.249997	0.499997	0.749997	0.999997	1.25	1.5	1.75	2	2.25	2.5	2.75	3	3.25	3.5	3.75	4	4.25	4.5	4.75	5	5.25	5.5	5.75	6	6.25	6.5	6.75	7	7.25	7.5	7.75	8	8.25	8.5	8.75	9	9.25	9.5	9.75	10	10.25	10.5	10.75	11	11.25	11.5	11.75	12
1	T. fusca cutinase	0.764467	0.6678	0.4951	0.4829	0.4805	0.4791	0.477	0.4794	0.4792	0.4749	0.473	0.4715	0.469	0.4696	0.4679	0.4671	0.4644	0.4639	0.4626	0.4611	0.4612	0.46	0.459	0.4584	0.4583	0.4587	0.4561	0.4552	0.4547	0.4536	0.4531	0.4525	0.4519	0.4511	0.4505	0.4502	0.4495	0.4489	0.4486	0.4479	0.4473	0.4467	0.4462	0.4456	0.4454	0.4451	0.4446	0.4443
1	T. fusca cutinase	0.764467	0.6706	0.5019	0.486	0.4833	0.4835	0.4841	0.4813	0.4779	0.4801	0.4776	0.4772	0.4761	0.4763	0.4729	0.4719	0.4707	0.4695	0.4686	0.4669	0.4663	0.4657	0.464	0.4641	0.4631	0.4627	0.4612	0.461	0.46	0.4594	0.4584	0.458	0.4576	0.4572	0.4559	0.4556	0.4548	0.4545	0.454	0.4536	0.4529	0.4524	0.4516	0.4513	0.4508	0.4504	0.4501	0.4499
1	T. fusca cutinase	0.764467	0.6799	0.5128	0.4981	0.497	0.5009	0.5007	0.4959	0.4945	0.4927	0.4928	0.4915	0.4876	0.4869	0.4855	0.4835	0.4815	0.4812	0.4796	0.4781	0.4766	0.4757	0.4743	0.4739	0.4732	0.4717	0.4704	0.4698	0.4693	0.468	0.4674	0.4668	0.466	0.4655	0.4645	0.464	0.4634	0.4628	0.4623	0.4617	0.4613	0.4607	0.46	0.4595	0.4591	0.4584	0.4581	0.4577
2	I. sakiensis PETase	0.764467	0.5514	0.478	0.5236	0.5869	0.6338	0.6689	0.6883	0.6962	0.7068	0.7145	0.7101	0.7103	0.7098	0.7104	0.7031	0.6965	0.6934	0.6903	0.688	0.6856	0.6825	0.6786	0.6771	0.6756	0.6735	0.6724	0.6696	0.667	0.662	0.658	0.6579	0.6575	0.6576	0.6574	0.6567	0.6557	0.6551	0.654	0.6535	0.6526	0.6516	0.6506	0.6504	0.65	0.6483	0.6472	0.6455
2	I. sakiensis PETase	0.764467	0.5656	0.4917	0.5296	0.5705	0.5937	0.6013	0.5963	0.5756	0.5644	0.5528	0.5393	0.5335	0.5328	0.5249	0.5183	0.5176	0.517	0.5156	0.514	0.5117	0.5104	0.5129	0.5118	0.5139	0.5144	0.5148	0.5149	0.5144	0.5154	0.515	0.5173	0.5238	0.532	0.5308	0.5262	0.5222	0.5204	0.5211	0.5205	0.5184	0.5147	0.5229	0.5186	0.5214	0.5211	0.5211	0.521
10	I. sakiensis PETase	0.764467	0.589	0.5131	0.5808	0.6309	0.6459	0.6585	0.6537	0.6291	0.6195	0.6114	0.5903	0.585	0.5837	0.5715	0.5668	0.5657	0.5625	0.5609	0.5595	0.5588	0.5582	0.559	0.5589	0.5596	0.5605	0.5607	0.5618	0.5608	0.5613	0.5607	0.5605	0.561	0.5625	0.5623	0.5615	0.5613	0.5619	0.5623	0.5618	0.5614	0.5621	0.5625	0.5626	0.563	0.5632	0.5631	0.5629
10	Geobacillus stearothermophilis esterase	0.764467	0.7215	0.5974	0.5308	0.4955	0.4751	0.4605	0.4491	0.4397	0.432	0.4255	0.4195	0.4142	0.4093	0.4044	0.4007	0.3967	0.3933	0.3902	0.3873	0.3843	0.3818	0.3793	0.377	0.3751	0.3733	0.3708	0.3692	0.3676	0.3662	0.3646	0.3635	0.3622	0.3611	0.3599	0.3587	0.3577	0.3569	0.3562	0.3552	0.3544	0.3538	0.3528	0.3521	0.3517	0.3512	0.3508	0.3504
10	Geobacillus stearothermophilis esterase	0.764467	0.7228	0.5977	0.5327	0.4992	0.4788	0.4637	0.4525	0.4432	0.4352	0.4284	0.4226	0.4171	0.4121	0.4073	0.4032	0.3993	0.3958	0.3926	0.3895	0.3865	0.3841	0.3817	0.379	0.3768	0.3752	0.3728	0.3711	0.3695	0.3679	0.3666	0.3651	0.3639	0.3628	0.3616	0.3604	0.3595	0.3585	0.3578	0.3571	0.3559	0.3555	0.3545	0.3538	0.3536	0.353	0.3525	0.352
11	Geobacillus stearothermophilis esterase	0.764467	0.7432	0.6102	0.5431	0.5086	0.4873	0.4706	0.4586	0.4488	0.4409	0.4341	0.4279	0.4224	0.4175	0.4127	0.4085	0.4043	0.4008	0.3976	0.3944	0.3915	0.389	0.3862	0.3841	0.3817	0.3799	0.3775	0.3757	0.3742	0.3725	0.371	0.3699	0.3685	0.3673	0.366	0.3649	0.3638	0.363	0.3623	0.3616	0.3606	0.3599	0.3591	0.3584	0.3578	0.3573	0.3568	0.3564
11	Bacillus subilis esterase	0.764467	0.7249	0.6725	0.6425	0.6138	0.5904	0.5822	0.577	0.5671	0.5662	0.5627	0.5595	0.5591	0.5561	0.5525	0.5526	0.5498	0.5482	0.5474	0.5476	0.5455	0.5446	0.5448	0.5444	0.542	0.5432	0.5425	0.5418	0.5409	0.541	0.5408	0.541	0.5403	0.5396	0.5398	0.54	0.5394	0.5396	0.5394	0.5378	0.5382	0.5374	0.537	0.537	0.5372	0.5372	0.5368	0.5367
11	Bacillus subilis esterase	0.764467	0.7223	0.6661	0.6369	0.6119	0.5921	0.5686	0.5555	0.5452	0.5351	0.5305	0.5249	0.5203	0.5174	0.5158	0.5145	0.5121	0.5112	0.5097	0.5072	0.5078	0.5074	0.5062	0.5054	0.5053	0.5044	0.5043	0.5037	0.5034	0.5042	0.5034	0.5031	0.5031	0.5029	0.5018	0.5014	0.5012	0.5007	0.5012	0.501	0.5006	0.5006	0.4995	0.4997	0.4986	0.4988	0.4988	0.4989
13	Bacillus subilis esterase	0.764467	0.7117	0.6514	0.6248	0.5992	0.582	0.5778	0.5706	0.5719	0.568	0.5616	0.5587	0.5551	0.5507	0.5481	0.5453	0.5465	0.5432	0.5425	0.5414	0.5428	0.5425	0.5409	0.5412	0.5415	0.5415	0.5391	0.5405	0.5395	0.5391	0.5397	0.5393	0.5399	0.5393	0.5397	0.5398	0.5393	0.5394	0.5392	0.5396	0.5395	0.5393	0.5394	0.5391	0.5394	0.5397	0.5393	0.5393
	MasterMix+BHET (G04)	0.764467	0.7645	0.7082	0.6982	0.6969	0.6948	0.6934	0.6942	0.6948	0.6977	0.6962	0.6966	0.694	0.6961	0.6935	0.693	0.6928	0.692	0.6918	0.6898	0.689	0.6869	0.6864	0.6842	0.6857	0.6808	0.6799	0.6776	0.677	0.6747	0.6728	0.6708	0.6718	0.6681	0.6663	0.6647	0.6639	0.6617	0.6608	0.6589	0.6595	0.6558	0.6547	0.653	0.6528	0.6507	0.6492	0.648
	MasterMix+BHET (G05)	0.764467	0.7632	0.7141	0.7022	0.7001	0.6975	0.6975	0.6984	0.6985	0.6959	0.697	0.701	0.6986	0.6919	0.7136	0.7127	0.7259	0.7456	0.7462	0.739	0.7367	0.7332	0.7358	0.731	0.7286	0.7267	0.7235	0.7211	0.7188	0.7155	0.713	0.7112	0.7074	0.7052	0.702	0.6995	0.6974	0.6939	0.6916	0.6914	0.6867	0.6841	0.6812	0.6789	0.6764	0.6741	0.672	0.67
	MasterMix+BHET (G06)	0.764467	0.7657	0.7161	0.7036	0.7	0.6986	0.6967	0.6994	0.696	0.6995	0.7006	0.7017	0.7019	0.7021	0.7009	0.7002	0.6998	0.7005	0.6999	0.6945	0.6921	0.6908	0.688	0.6874	0.6873	0.6855	0.6817	0.6827	0.68	0.678	0.6757	0.6733	0.6721	0.6704	0.6698	0.668	0.6661	0.6644	0.6629	0.6615	0.6596	0.6588	0.6565	0.6552	0.6542	0.6523	0.6511	0.6498
	MaserMix No BHET	0.764467	0.8036	0.7493	0.7383	0.7361	0.7355	0.7355	0.7354	0.7351	0.7349	0.7348	0.7349	0.7348	0.7346	0.7348	0.7343	0.7343	0.7345	0.7342	0.7342	0.734	0.734	0.7338	0.7338	0.734	0.7338	0.7333	0.7334	0.7336	0.7332	0.7333	0.7332	0.7334	0.7333	0.733	0.7329	0.7329	0.7326	0.7326	0.7326	0.7325	0.7325	0.7325	0.7322	0.7323	0.7323	0.7325	0.732
	MaserMix No BHET	0.764467	0.828	0.7691	0.7585	0.7569	0.7561	0.7555	0.7552	0.7549	0.7549	0.7548	0.7548	0.7548	0.7546	0.7542	0.7542	0.7544	0.7544	0.7542	0.754	0.7538	0.7538	0.7538	0.7538	0.7538	0.7539	0.7533	0.7533	0.7531	0.753	0.7528	0.7531	0.753	0.7527	0.7527	0.7525	0.7523	0.7526	0.7526	0.7524	0.7523	0.7519	0.7519	0.752	0.7519	0.7518	0.752	0.7518
	MaserMix No BHET	0.764467	0.8175	0.7625	0.7541	0.7529	0.7525	0.752	0.7519	0.7518	0.7517	0.7513	0.7516	0.7514	0.7514	0.751	0.7511	0.7508	0.751	0.7508	0.7509	0.7509	0.7508	0.7505	0.7507	0.7508	0.7504	0.75	0.7498	0.7504	0.75	0.7499	0.75	0.7499	0.7495	0.7497	0.7495	0.7496	0.7494	0.7497	0.7492	0.7491	0.7489	0.749	0.7486	0.7491	0.7487	0.7491	0.7488
[truncated: 50 more columns]

## Sheet: Average ∆Abs550
	Avg ∆Abs
	avg. time [s]	0	899.99	1799.99	2699.99	3599.99	4499.99	5399.99	6299.99	7199.99	8099.99	8999.99	9899.99	10800	11700	12600	13500	14400	15300	16200	17100	18000	18900	19800	20700	21600	22500	23400	24300	25200	26100	27000	27900	28800	29700	30600	31500	32400	33300	34200	35100	36000	36900	37800	38700	39600	40500	41400	42300
	Time (min)	0	14.9998	29.9998	44.9998	59.9998	74.9998	89.9998	105	120	135	150	165	180	195	210	225	240	255	270	285	300	315	330	345	360	375	390	405	420	435	450	465	480	495	510	525	540	555	570	585	600	615	630	645	660	675	690	705
1	T. fusca cutinase	0	0.139433	0.285533	0.263033	0.249983	0.238933	0.245533	0.253283	0.255533	0.260433	0.269283	0.271733	0.276433	0.277583	0.281883	0.280083	0.284033	0.283183	0.287883	0.285433	0.290083	0.287033	0.291433	0.288133	0.292033	0.288483	0.293183	0.289983	0.293833	0.290883	0.294183	0.290883	0.293833	0.289883	0.293533	0.291083	0.295033	0.291933	0.294933	0.291883	0.295583	0.291933	0.296233	0.292933	0.296733	0.293183	0.297233	0.293633
2	I. sakiensis PETase	0	0.191133	0.289933	0.240633	0.199633	0.191433	0.206433	0.216283	0.228133	0.234233	0.248633	0.257933	0.261383	0.266533	0.271433	0.272533	0.275933	0.275383	0.278483	0.276983	0.280333	0.278233	0.280733	0.278483	0.281283	0.278133	0.281733	0.279133	0.281583	0.279283	0.281483	0.277633	0.279233	0.274833	0.277683	0.274633	0.277333	0.274083	0.276183	0.272233	0.275083	0.270883	0.273783	0.270733	0.273233	0.270383	0.272433	0.269733
10	Geobacillus stearothermophilis esterase	0	0.0348667	0.167733	0.238033	0.2792	0.2984	0.3148	0.324767	0.335333	0.341567	0.349633	0.3544	0.360933	0.364533	0.370467	0.373333	0.378333	0.380667	0.385167	0.387033	0.391033	0.392533	0.396033	0.397267	0.400333	0.401067	0.4046	0.4051	0.4078	0.4084	0.410667	0.411167	0.413267	0.413367	0.415667	0.4156	0.417733	0.4177	0.419433	0.4192	0.420867	0.420767	0.4225	0.422133	0.423533	0.4231	0.424433	0.424067
11	Bacillus subilis esterase	0	0.0491	0.109933	0.139267	0.1663	0.189167	0.201733	0.212533	0.221767	0.23	0.2348	0.239567	0.238467	0.2442	0.245733	0.2492	0.247167	0.250667	0.251233	0.253533	0.251267	0.254167	0.253533	0.256233	0.253533	0.257533	0.255133	0.2586	0.256	0.2594	0.256633	0.2604	0.257567	0.261267	0.2587	0.261567	0.258833	0.262067	0.2594	0.2621	0.259333	0.262767	0.2597	0.2633	0.2605	0.263133	0.260233	0.263033
	MasterMix+BHET (G04)	0	0	0.0517	0.0647	0.0691	0.0715333	0.0722333	0.0723333	0.0711667	0.0708333	0.0709667	0.0688667	0.068	0.0634	0.0674	0.0593333	0.0652333	0.0482333	0.0454333	0.0495333	0.0492	0.0503333	0.0477	0.0531	0.0485667	0.0578	0.0575667	0.0571333	0.0616667	0.0567333	0.0557667	0.0621	0.0579333	0.0647667	0.0654667	0.0700333	0.0701333	0.0757667	0.0765333	0.0809667	0.0816667	0.0860667	0.0872	0.0921333	0.0927333	0.0968667	0.0977667	0.1012
	MaserMix No BHET	0	0.0144	0.0645333	0.0781667	0.0819	0.0831667	0.0837667	0.0835	0.0819	0.0812667	0.0804	0.0803667	0.0775333	0.0756333	0.0767333	0.0747333	0.0739333	0.0581667	0.0554667	0.0588667	0.0582667	0.0610333	0.0592333	0.0628667	0.0600667	0.0660333	0.0664	0.0644667	0.0693667	0.0729333	0.0724	0.0765	0.0730667	0.0777333	0.0786333	0.0813333	0.0815667	0.0853	0.0864333	0.0891	0.0901667	0.0928667	0.0940667	0.0972667	0.0979333	0.1006	0.1013	0.1036
	avg. time [s]	0	899.99	1799.99	2699.99	3599.99	4499.99	5399.99	6299.99	7199.99	8099.99	8999.99	9899.99	10800	11700	12600	13500	14400	15300	16200	17100	18000	18900	19800	20700	21600	22500	23400	24300	25200	26100	27000	27900	28800	29700	30600	31500	32400	33300	34200	35100	36000	36900	37800	38700	39600	40500	41400	42300
	Time (min)	0	14.9998	29.9998	44.9998	59.9998	74.9998	89.9998	105	120	135	150	165	180	195	210	225	240	255	270	285	300	315	330	345	360	375	390	405	420	435	450	465	480	495	510	525	540	555	570	585	600	615	630	645	660	675	690	705
1	T. fusca cutinase	0	0.0917	0.2612	0.275467	0.277533	0.276633	0.2772	0.278933	0.2806	0.2819	0.283333	0.2844	0.2869	0.286867	0.289033	0.2903	0.292267	0.292933	0.2942	0.295767	0.296433	0.297333	0.2987	0.299	0.2996	0.3001	0.3019	0.302467	0.303133	0.304133	0.304833	0.305367	0.305967	0.306533	0.3075	0.307867	0.308567	0.309067	0.3095	0.310067	0.310633	0.3112	0.311867	0.312333	0.3127	0.313167	0.313533	0.313833
2	I. sakiensis PETase	0	0.1958	0.2702	0.2198	0.168367	0.14	0.121567	0.118367	0.130833	0.134233	0.138233	0.151233	0.154867	0.1557	0.1622	0.1684	0.1712	0.1735	0.175533	0.1773	0.1791	0.180767	0.180967	0.181867	0.181433	0.181667	0.181833	0.182367	0.183733	0.1849	0.186567	0.1859	0.1837	0.180433	0.180967	0.183	0.184733	0.185333	0.185333	0.185867	0.187	0.188333	0.1858	0.187267	0.186333	0.186933	0.187333	0.188
10	Geobacillus stearothermophilis esterase	0	0.0353	0.1627	0.228933	0.263367	0.284067	0.299533	0.311067	0.320567	0.328433	0.335133	0.341133	0.346567	0.3515	0.356333	0.360333	0.364367	0.367833	0.371	0.374067	0.377033	0.3795	0.382067	0.384433	0.3866	0.388333	0.390767	0.392467	0.394033	0.3956	0.397067	0.3983	0.3996	0.400733	0.401967	0.403133	0.404133	0.405	0.4057	0.4065	0.4075	0.408067	0.409	0.4097	0.4101	0.410633	0.4111	0.411533
11	Bacillus subilis esterase	0	0.0448333	0.101133	0.129733	0.156167	0.1763	0.188267	0.196767	0.203067	0.208033	0.212867	0.216767	0.219633	0.223067	0.225667	0.227	0.228333	0.230267	0.231267	0.2324	0.232433	0.232967	0.233833	0.234133	0.234867	0.234767	0.235833	0.2358	0.236533	0.236367	0.2365	0.236667	0.2367	0.2372	0.237367	0.2374	0.237833	0.2379	0.237867	0.238333	0.238367	0.2387	0.239167	0.2392	0.2394	0.239233	0.2395	0.2395
	MasterMix+BHET (G04)	0	7.40149e-17	0.0516667	0.0631333	0.0654667	0.0675	0.0686	0.0671333	0.0680333	0.0667667	0.0665333	0.0647	0.0663	0.0677667	0.0618	0.0625	0.0583	0.0517667	0.0518333	0.0567	0.0585333	0.0608333	0.0610667	0.0636	0.0639333	0.0668	0.0694333	0.0706667	0.0725333	0.0750667	0.0773	0.0793667	0.0807	0.0832333	0.0851	0.0870667	0.0886667	0.0911333	0.0927	0.0938667	0.0958667	0.0982333	0.100333	0.1021	0.103333	0.105433	0.107033	0.108533
	MaserMix No BHET	0	-0.0519	0.00416667	0.0141667	0.0158333	0.0164333	0.0168	0.0169667	0.0172	0.0173	0.0175	0.0173667	0.0174667	0.0176	0.0178	0.0179333	0.0179667	0.0178333	0.0180667	0.0181	0.0182333	0.0182667	0.0184333	0.0183667	0.0182667	0.0184333	0.0189333	0.0189667	0.0187667	0.0190667	0.0191333	0.0190333	0.0190333	0.0193	0.0193333	0.0195	0.0195333	0.0196	0.0195	0.0197333	0.0198333	0.0200333	0.02	0.0202	0.0200333	0.0202	0.0199333	0.0202667
[truncated: 50 more columns]

## Sheet: µmol Indicator Protonated
	Time (min)	0	14.9998	29.9998	44.9998	59.9998	74.9998	89.9998	105	120	135	150	165	180	195	210	225	240	255	270	285	300	315	330	345	360	375	390	405	420	435	450	465	480	495	510	525	540	555	570	585	600	615	630	645	660	675	690	705
1	T. fusca cutinase	0	0.00185206	0.00379266	0.0034938	0.00332046	0.00317369	0.00326136	0.0033643	0.00339418	0.00345927	0.00357682	0.00360936	0.00367179	0.00368707	0.00374418	0.00372027	0.00377274	0.00376145	0.00382388	0.00379134	0.0038531	0.00381259	0.00387103	0.0038272	0.003879	0.00383185	0.00389428	0.00385177	0.00390291	0.00386373	0.00390756	0.00386373	0.00390291	0.00385044	0.00389893	0.00386638	0.00391885	0.00387767	0.00391752	0.00387701	0.00392616	0.00387767	0.00393479	0.00389096	0.00394143	0.00389428	0.00394807	0.00390025
2	I. sakiensis PETase	0	0.00253877	0.00385111	0.00319627	0.00265168	0.00254276	0.002742	0.00287284	0.00303024	0.00311126	0.00330253	0.00342606	0.00347189	0.00354029	0.00360538	0.00361999	0.00366515	0.00365784	0.00369902	0.0036791	0.00372359	0.0036957	0.00372891	0.00369902	0.00373621	0.00369437	0.00374219	0.00370766	0.0037402	0.00370965	0.00373887	0.00368773	0.00370898	0.00365054	0.0036884	0.00364788	0.00368375	0.00364058	0.00366847	0.003616	0.00365386	0.00359807	0.00363659	0.00359608	0.00362929	0.00359143	0.00361866	0.0035828
10	Geobacillus stearothermophilis esterase	0	0.000463125	0.00222796	0.00316173	0.00370854	0.00396357	0.00418141	0.00431379	0.00445415	0.00453694	0.00464409	0.0047074	0.00479418	0.004842	0.00492081	0.00495889	0.0050253	0.0050563	0.00511607	0.00514086	0.00519399	0.00521392	0.00526041	0.00527679	0.00531752	0.00532726	0.0053742	0.00538084	0.0054167	0.00542467	0.00545478	0.00546142	0.00548931	0.00549064	0.00552119	0.00552031	0.00554864	0.0055482	0.00557122	0.00556812	0.00559026	0.00558893	0.00561196	0.00560709	0.00562568	0.00561993	0.00563764	0.00563277
11	Bacillus subilis esterase	0	0.000652182	0.00146022	0.00184984	0.00220892	0.00251265	0.00267957	0.00282302	0.00294567	0.00305503	0.00311879	0.0031821	0.00316749	0.00324364	0.00326401	0.00331006	0.00328305	0.00332954	0.00333707	0.00336762	0.00333751	0.00337603	0.00336762	0.00340348	0.00336762	0.00342075	0.00338887	0.00343492	0.00340038	0.00344554	0.00340879	0.00345883	0.00342119	0.00347034	0.00343624	0.00347432	0.00343802	0.00348096	0.00344554	0.00348141	0.00344466	0.00349026	0.00344953	0.00349735	0.00346015	0.00349513	0.00345661	0.0034938
	MasterMix+BHET (G04)	0	0	0.000686718	0.000859393	0.000917837	0.000950159	0.000959457	0.000960785	0.000945288	0.000940861	0.000942632	0.000914738	0.000903226	0.000842126	0.000895257	0.000788109	0.000866477	0.000640671	0.000603479	0.000657938	0.000653511	0.000668565	0.000633587	0.000705313	0.000645098	0.000767742	0.000764643	0.000758887	0.000819102	0.000753574	0.000740734	0.000824858	0.000769513	0.000860279	0.000869577	0.000930235	0.000931563	0.00100639	0.00101657	0.00107546	0.00108476	0.0011432	0.00115825	0.00122378	0.00123175	0.00128665	0.00129861	0.00134421
	MaserMix No BHET	0	0.000191271	0.000857179	0.00103827	0.00108786	0.00110468	0.00111265	0.00110911	0.00108786	0.00107944	0.00106793	0.00106749	0.00102986	0.00100462	0.00101923	0.000992663	0.000982037	0.000772613	0.000736749	0.000781911	0.000773941	0.00081069	0.000786781	0.000835042	0.00079785	0.000877104	0.000881974	0.000856294	0.000921379	0.000968754	0.00096167	0.00101613	0.000970525	0.00103251	0.00104447	0.00108033	0.00108343	0.00113302	0.00114807	0.00118349	0.00119766	0.00123352	0.00124946	0.00129197	0.00130082	0.00133624	0.00134554	0.00137609
	Time (min)	0	14.9998	29.9998	44.9998	59.9998	74.9998	89.9998	105	120	135	150	165	180	195	210	225	240	255	270	285	300	315	330	345	360	375	390	405	420	435	450	465	480	495	510	525	540	555	570	585	600	615	630	645	660	675	690	705
1	T. fusca cutinase	0	0.00121803	0.00346945	0.00365895	0.0036864	0.00367445	0.00368198	0.003705	0.00372714	0.0037444	0.00376344	0.00377761	0.00381082	0.00381038	0.00383915	0.00385598	0.0038821	0.00389096	0.00390778	0.00392859	0.00393745	0.0039494	0.00396755	0.00397154	0.00397951	0.00398615	0.00401006	0.00401759	0.00402644	0.00403972	0.00404902	0.00405611	0.00406408	0.0040716	0.00408444	0.00408931	0.00409861	0.00410525	0.00411101	0.00411853	0.00412606	0.00413359	0.00414244	0.00414864	0.00415351	0.00415971	0.00416458	0.00416857
2	I. sakiensis PETase	0	0.00260076	0.003589	0.00291955	0.00223637	0.00185958	0.00161474	0.00157223	0.00173783	0.00178299	0.00183612	0.00200879	0.00205705	0.00206812	0.00215446	0.00223681	0.002274	0.00230456	0.00233156	0.00235503	0.00237894	0.00240108	0.00240373	0.00241569	0.00240993	0.00241303	0.00241524	0.00242233	0.00244048	0.00245598	0.00247812	0.00246926	0.00244004	0.00239665	0.00240373	0.00243074	0.00245376	0.00246173	0.00246173	0.00246882	0.00248387	0.00250158	0.00246793	0.00248741	0.00247502	0.00248299	0.0024883	0.00249715
10	Geobacillus stearothermophilis esterase	0	0.000468881	0.0021611	0.00304086	0.00349823	0.00377318	0.00397862	0.00413182	0.004258	0.00436249	0.00445149	0.00453119	0.00460335	0.00466888	0.00473308	0.00478621	0.00483979	0.00488583	0.0049279	0.00496863	0.00500804	0.0050408	0.00507489	0.00510633	0.00513511	0.00515813	0.00519045	0.00521303	0.00523384	0.00525465	0.00527413	0.00529052	0.00530778	0.00532284	0.00533922	0.00535471	0.005368	0.00537951	0.00538881	0.00539943	0.00541272	0.00542024	0.00543264	0.00544194	0.00544725	0.00545434	0.00546053	0.00546629
11	Bacillus subilis esterase	0	0.000595509	0.00134333	0.00172321	0.00207432	0.00234175	0.0025007	0.0026136	0.00269728	0.00276325	0.00282745	0.00287926	0.00291733	0.00296294	0.00299747	0.00301518	0.00303289	0.00305857	0.00307185	0.00308691	0.00308735	0.00309444	0.00310595	0.00310993	0.00311967	0.00311834	0.00313251	0.00313207	0.00314181	0.0031396	0.00314137	0.00314358	0.00314402	0.00315067	0.00315288	0.00315332	0.00315908	0.00315996	0.00315952	0.00316572	0.00316616	0.00317059	0.00317679	0.00317723	0.00317989	0.00317767	0.00318122	0.00318122
	MasterMix+BHET	0	9.8312e-19	0.000686275	0.000838584	0.000869577	0.000896585	0.000911196	0.000891715	0.000903669	0.000886844	0.000883745	0.000859393	0.000880646	0.000900127	0.000820873	0.000830171	0.000774384	0.000687603	0.000688489	0.000753131	0.000777483	0.000808033	0.000811133	0.000844782	0.00084921	0.000887287	0.000922265	0.000938647	0.000963441	0.000997091	0.00102676	0.00105421	0.00107192	0.00110557	0.00113036	0.00115648	0.00117774	0.0012105	0.00123131	0.00124681	0.00127337	0.00130481	0.0013327	0.00135617	0.00137255	0.00140044	0.0014217	0.00144162
	MasterMix No BHET	0	-0.000689374	5.53447e-05	0.000188172	0.00021031	0.00021828	0.00022315	0.000225364	0.000228463	0.000229791	0.000232448	0.000230677	0.000232005	0.000233776	0.000236433	0.000238204	0.000238647	0.000236876	0.000239975	0.000240418	0.000242189	0.000242631	0.000244845	0.00024396	0.000242631	0.000244845	0.000251487	0.000251929	0.000249273	0.000253258	0.000254143	0.000252815	0.000252815	0.000256357	0.0002568	0.000259013	0.000259456	0.000260342	0.000259013	0.000262113	0.000263441	0.000266098	0.000265655	0.000268311	0.000266098	0.000268311	0.000264769	0.000269197
[truncated: 50 more columns]

## Sheet: µmol Buffer Protonated
	µmol buffer protonated
	Time (min)	0	14.9998	29.9998	44.9998	59.9998	74.9998	89.9998	105	120	135	150	165	180	195	210	225	240	255	270	285	300	315	330	345	360	375	390	405	420	435	450	465	480	495	510	525	540	555	570	585	600	615	630	645	660	675	690	705
1	T. fusca cutinase	0	0.0926028	0.189633	0.17469	0.166023	0.158684	0.163068	0.168215	0.169709	0.172963	0.178841	0.180468	0.18359	0.184353	0.187209	0.186014	0.188637	0.188073	0.191194	0.189567	0.192655	0.190629	0.193552	0.19136	0.19395	0.191592	0.194714	0.192589	0.195146	0.193186	0.195378	0.193186	0.195146	0.192522	0.194946	0.193319	0.195943	0.193884	0.195876	0.193851	0.196308	0.193884	0.19674	0.194548	0.197072	0.194714	0.197404	0.195013
2	I. sakiensis PETase	0	0.126939	0.192555	0.159813	0.132584	0.127138	0.1371	0.143642	0.151512	0.155563	0.165127	0.171303	0.173594	0.177015	0.180269	0.180999	0.183258	0.182892	0.184951	0.183955	0.18618	0.184785	0.186445	0.184951	0.186811	0.184719	0.18711	0.185383	0.18701	0.185482	0.186943	0.184387	0.185449	0.182527	0.18442	0.182394	0.184187	0.182029	0.183424	0.1808	0.182693	0.179904	0.18183	0.179804	0.181464	0.179572	0.180933	0.17914
10	Geobacillus stearothermophilis esterase	0	0.0231562	0.111398	0.158087	0.185427	0.198178	0.20907	0.21569	0.222707	0.226847	0.232204	0.23537	0.239709	0.2421	0.246041	0.247944	0.251265	0.252815	0.255803	0.257043	0.2597	0.260696	0.26302	0.263839	0.265876	0.266363	0.26871	0.269042	0.270835	0.271234	0.272739	0.273071	0.274466	0.274532	0.27606	0.276015	0.277432	0.27741	0.278561	0.278406	0.279513	0.279447	0.280598	0.280354	0.281284	0.280996	0.281882	0.281638
11	Bacillus subilis esterase	0	0.0326091	0.0730108	0.0924921	0.110446	0.125633	0.133979	0.141151	0.147283	0.152752	0.155939	0.159105	0.158375	0.162182	0.163201	0.165503	0.164153	0.166477	0.166853	0.168381	0.166875	0.168801	0.168381	0.170174	0.168381	0.171037	0.169443	0.171746	0.170019	0.172277	0.17044	0.172941	0.17106	0.173517	0.171812	0.173716	0.171901	0.174048	0.172277	0.17407	0.172233	0.174513	0.172476	0.174867	0.173008	0.174757	0.172831	0.17469
	MasterMix+BHET (G04)	0	0	0.0343359	0.0429697	0.0458919	0.0475079	0.0479728	0.0480392	0.0472644	0.047043	0.0471316	0.0457369	0.0451613	0.0421063	0.0447628	0.0394055	0.0433239	0.0320335	0.030174	0.0328969	0.0326755	0.0334282	0.0316793	0.0352657	0.0322549	0.0383871	0.0382322	0.0379444	0.0409551	0.0376787	0.0370367	0.0412429	0.0384757	0.0430139	0.0434788	0.0465117	0.0465781	0.0503194	0.0508286	0.053773	0.0542379	0.0571601	0.0579127	0.0611892	0.0615876	0.0643327	0.0649305	0.0672107
	MaserMix No BHET	0	0.00956357	0.042859	0.0519134	0.0543928	0.0552341	0.0556325	0.0554554	0.0543928	0.0539722	0.0533966	0.0533745	0.0514928	0.0502309	0.0509614	0.0496332	0.0491019	0.0386306	0.0368375	0.0390955	0.038697	0.0405345	0.039339	0.0417521	0.0398925	0.0438552	0.0440987	0.0428147	0.046069	0.0484377	0.0480835	0.0508065	0.0485263	0.0516256	0.0522233	0.0540165	0.0541714	0.0566509	0.0574036	0.0591746	0.059883	0.0616762	0.0624732	0.0645984	0.0650411	0.0668122	0.0672771	0.0688046
	µmol buffer protonated
	Time (min)	0	14.9998	29.9998	44.9998	59.9998	74.9998	89.9998	105	120	135	150	165	180	195	210	225	240	255	270	285	300	315	330	345	360	375	390	405	420	435	450	465	480	495	510	525	540	555	570	585	600	615	630	645	660	675	690	705
1	T. fusca cutinase	0	0.0609014	0.173473	0.182948	0.18432	0.183722	0.184099	0.18525	0.186357	0.18722	0.188172	0.188881	0.190541	0.190519	0.191958	0.192799	0.194105	0.194548	0.195389	0.19643	0.196872	0.19747	0.198378	0.198577	0.198975	0.199308	0.200503	0.200879	0.201322	0.201986	0.202451	0.202805	0.203204	0.20358	0.204222	0.204466	0.204931	0.205263	0.20555	0.205927	0.206303	0.206679	0.207122	0.207432	0.207676	0.207986	0.208229	0.208428
2	I. sakiensis PETase	0	0.130038	0.17945	0.145977	0.111819	0.0929792	0.0807369	0.0786117	0.0868913	0.0891493	0.0918059	0.10044	0.102853	0.103406	0.107723	0.111841	0.1137	0.115228	0.116578	0.117751	0.118947	0.120054	0.120187	0.120784	0.120497	0.120652	0.120762	0.121116	0.122024	0.122799	0.123906	0.123463	0.122002	0.119832	0.120187	0.121537	0.122688	0.123087	0.123087	0.123441	0.124194	0.125079	0.123397	0.124371	0.123751	0.124149	0.124415	0.124858
10	Geobacillus stearothermophilis esterase	0	0.023444	0.108055	0.152043	0.174912	0.188659	0.198931	0.206591	0.2129	0.218125	0.222574	0.226559	0.230168	0.233444	0.236654	0.239311	0.241989	0.244292	0.246395	0.248431	0.250402	0.25204	0.253745	0.255316	0.256755	0.257907	0.259523	0.260652	0.261692	0.262733	0.263707	0.264526	0.265389	0.266142	0.266961	0.267736	0.2684	0.268975	0.26944	0.269972	0.270636	0.271012	0.271632	0.272097	0.272363	0.272717	0.273027	0.273314
11	Bacillus subilis esterase	0	0.0297755	0.0671664	0.0861607	0.103716	0.117087	0.125035	0.13068	0.134864	0.138163	0.141373	0.143963	0.145867	0.148147	0.149874	0.150759	0.151645	0.152929	0.153593	0.154345	0.154368	0.154722	0.155297	0.155497	0.155984	0.155917	0.156626	0.156603	0.157091	0.15698	0.157068	0.157179	0.157201	0.157533	0.157644	0.157666	0.157954	0.157998	0.157976	0.158286	0.158308	0.158529	0.158839	0.158862	0.158994	0.158884	0.159061	0.159061
	MasterMix+BHET (G04)	0	4.9156e-17	0.0343137	0.0419292	0.0434788	0.0448292	0.0455598	0.0445857	0.0451835	0.0443422	0.0441872	0.0429697	0.0440323	0.0450063	0.0410437	0.0415086	0.0387192	0.0343802	0.0344244	0.0376566	0.0388742	0.0404017	0.0405566	0.0422391	0.0424605	0.0443643	0.0461132	0.0469323	0.0481721	0.0498545	0.0513378	0.0527103	0.0535959	0.0552783	0.0565181	0.0578242	0.0588868	0.060525	0.0615655	0.0623403	0.0636686	0.0652404	0.0666351	0.0678084	0.0686275	0.0700222	0.0710848	0.072081
	MaserMix No BHET	0	-0.0344687	0.00276724	0.00940861	0.0105155	0.010914	0.0111575	0.0112682	0.0114232	0.0114896	0.0116224	0.0115338	0.0116003	0.0116888	0.0118216	0.0119102	0.0119323	0.0118438	0.0119987	0.0120209	0.0121094	0.0121316	0.0122423	0.012198	0.0121316	0.0122423	0.0125743	0.0125965	0.0124636	0.0126629	0.0127072	0.0126407	0.0126407	0.0128178	0.01284	0.0129507	0.0129728	0.0130171	0.0129507	0.0131056	0.013172	0.0133049	0.0132827	0.0134156	0.0133049	0.0134156	0.0132385	0.0134598
[truncated: 50 more columns]

## Sheet: µmol Ester Cleaved
	Time (min)	0	15	30	45	60	75	90	105	120	135	150	165	180	195	210	225	240	255	270	285	300	315	330	345	360	375	390	405	420	435	450	465	480	495	510	525	540	555	570	585	600	615	630	645	660	675	690	705
1	T. fusca cutinase	0	0.0944549	0.193426	0.178184	0.169344	0.161858	0.166329	0.171579	0.173103	0.176423	0.182418	0.184078	0.187261	0.18804	0.190953	0.189734	0.19241	0.191834	0.195018	0.193358	0.196508	0.194442	0.197423	0.195187	0.197829	0.195424	0.198608	0.19644	0.199048	0.19705	0.199286	0.19705	0.199048	0.196373	0.198845	0.197186	0.199861	0.197761	0.199794	0.197728	0.200234	0.197761	0.200674	0.198439	0.201013	0.198608	0.201352	0.198913
2	I. sakiensis PETase	0	0.129477	0.196407	0.16301	0.135236	0.129681	0.139842	0.146515	0.154542	0.158674	0.168429	0.174729	0.177066	0.180555	0.183874	0.184619	0.186923	0.18655	0.18865	0.187634	0.189903	0.188481	0.190174	0.18865	0.190547	0.188413	0.190852	0.18909	0.19075	0.189192	0.190682	0.188074	0.189158	0.186178	0.188108	0.186042	0.187871	0.185669	0.187092	0.184416	0.186347	0.183502	0.185466	0.1834	0.185094	0.183163	0.184552	0.182723
10	Geobacillus stearothermophilis esterase	0	0.0236194	0.113626	0.161248	0.189136	0.202142	0.213252	0.220003	0.227161	0.231384	0.236849	0.240078	0.244503	0.246942	0.250961	0.252903	0.25629	0.257871	0.260919	0.262184	0.264894	0.26591	0.268281	0.269116	0.271194	0.27169	0.274084	0.274423	0.276252	0.276658	0.278194	0.278532	0.279955	0.280023	0.281581	0.281536	0.282981	0.282958	0.284132	0.283974	0.285103	0.285036	0.28621	0.285961	0.28691	0.286616	0.28752	0.287271
11	Bacillus subilis esterase	0	0.0332613	0.074471	0.094342	0.112655	0.128145	0.136658	0.143974	0.150229	0.155807	0.159058	0.162287	0.161542	0.165426	0.166465	0.168813	0.167436	0.169807	0.17019	0.171748	0.170213	0.172178	0.171748	0.173578	0.171748	0.174458	0.172832	0.175181	0.173419	0.175723	0.173848	0.1764	0.174481	0.176987	0.175248	0.17719	0.175339	0.177529	0.175723	0.177552	0.175678	0.178003	0.175926	0.178365	0.176468	0.178252	0.176287	0.178184
	MasterMix+BHET (G04)	0	0	0.0350226	0.0438291	0.0468097	0.0484581	0.0489323	0.049	0.0482097	0.0479839	0.0480742	0.0466516	0.0460645	0.0429484	0.0456581	0.0401936	0.0441903	0.0326742	0.0307774	0.0335549	0.033329	0.0340968	0.0323129	0.035971	0.0329	0.0391549	0.0389968	0.0387032	0.0417742	0.0384323	0.0377774	0.0420678	0.0392452	0.0438742	0.0443484	0.047442	0.0475097	0.0513258	0.0518452	0.0548484	0.0553226	0.0583033	0.059071	0.0624129	0.0628194	0.0656194	0.0662291	0.0685549
	MaserMix No BHET	0	0.00975484	0.0437162	0.0529516	0.0554807	0.0563387	0.0567452	0.0565645	0.0554807	0.0550516	0.0544645	0.054442	0.0525226	0.0512355	0.0519807	0.0506258	0.0500839	0.0394032	0.0375742	0.0398774	0.039471	0.0413452	0.0401258	0.0425871	0.0406903	0.0447323	0.0449807	0.043671	0.0469903	0.0494065	0.0490452	0.0518226	0.0494968	0.0526581	0.0532678	0.0550968	0.0552549	0.0577839	0.0585516	0.0603581	0.0610807	0.0629097	0.0637226	0.0658904	0.066342	0.0681484	0.0686226	0.0701807
	Time (min)	0	15	30	45	60	75	90	105	120	135	150	165	180	195	210	225	240	255	270	285	300	315	330	345	360	375	390	405	420	435	450	465	480	495	510	525	540	555	570	585	600	615	630	645	660	675	690	705
1	T. fusca cutinase	0	0.0621194	0.176942	0.186607	0.188007	0.187397	0.187781	0.188955	0.190084	0.190965	0.191936	0.192658	0.194352	0.194329	0.195797	0.196655	0.197987	0.198439	0.199297	0.200358	0.20081	0.201419	0.202345	0.202548	0.202955	0.203294	0.204513	0.204897	0.205348	0.206026	0.2065	0.206861	0.207268	0.207652	0.208307	0.208555	0.209029	0.209368	0.209661	0.210045	0.210429	0.210813	0.211265	0.211581	0.211829	0.212145	0.212394	0.212597
2	I. sakiensis PETase	0	0.132639	0.183039	0.148897	0.114055	0.0948388	0.0823517	0.0801839	0.0886291	0.0909323	0.093642	0.102448	0.10491	0.105474	0.109877	0.114077	0.115974	0.117532	0.11891	0.120107	0.121326	0.122455	0.12259	0.1232	0.122907	0.123065	0.123177	0.123539	0.124465	0.125255	0.126384	0.125932	0.124442	0.122229	0.12259	0.123968	0.125142	0.125548	0.125548	0.12591	0.126677	0.127581	0.125865	0.126858	0.126226	0.126632	0.126903	0.127355
10	Geobacillus stearothermophilis esterase	0	0.0239129	0.110216	0.155084	0.17841	0.192432	0.20291	0.210723	0.217158	0.222487	0.227026	0.23109	0.234771	0.238113	0.241387	0.244097	0.246829	0.249178	0.251323	0.2534	0.25541	0.257081	0.258819	0.260423	0.26189	0.263065	0.264713	0.265865	0.266926	0.267987	0.268981	0.269816	0.270697	0.271465	0.2723	0.27309	0.273768	0.274355	0.274829	0.275371	0.276049	0.276432	0.277065	0.277539	0.27781	0.278171	0.278487	0.278781
11	Bacillus subilis esterase	0	0.030371	0.0685097	0.0878839	0.10579	0.119429	0.127536	0.133294	0.137561	0.140926	0.1442	0.146842	0.148784	0.15111	0.152871	0.153774	0.154677	0.155987	0.156665	0.157432	0.157455	0.157816	0.158403	0.158607	0.159103	0.159036	0.159758	0.159736	0.160232	0.160119	0.16021	0.160323	0.160345	0.160684	0.160797	0.160819	0.161113	0.161158	0.161136	0.161452	0.161474	0.1617	0.162016	0.162039	0.162174	0.162061	0.162242	0.162242
	MasterMix+BHET	0	5.01391e-17	0.035	0.0427678	0.0443484	0.0457258	0.046471	0.0454774	0.0460871	0.0452291	0.045071	0.0438291	0.0449129	0.0459065	0.0418645	0.0423387	0.0394936	0.0350678	0.0351129	0.0384097	0.0396516	0.0412097	0.0413678	0.0430839	0.0433097	0.0452516	0.0470355	0.047871	0.0491355	0.0508516	0.0523645	0.0537645	0.0546678	0.0563839	0.0576484	0.0589807	0.0600645	0.0617355	0.0627968	0.0635871	0.064942	0.0665452	0.0679678	0.0691646	0.07	0.0714226	0.0725065	0.0735226
	MaserMix No BHET	0	-0.0351581	0.00282258	0.00959678	0.0107258	0.0111323	0.0113807	0.0114936	0.0116516	0.0117194	0.0118548	0.0117645	0.0118323	0.0119226	0.0120581	0.0121484	0.012171	0.0120807	0.0122387	0.0122613	0.0123516	0.0123742	0.0124871	0.0124419	0.0123742	0.0124871	0.0128258	0.0128484	0.0127129	0.0129161	0.0129613	0.0128936	0.0128936	0.0130742	0.0130968	0.0132097	0.0132323	0.0132774	0.0132097	0.0133677	0.0134355	0.013571	0.0135484	0.0136839	0.013571	0.0136839	0.0135032	0.013729
	AVERAGE
	Time (min)	0	15	30	45	60	75	90	105	120	135	150	165	180	195	210	225	240	255	270	285	300	315	330	345	360	375	390	405	420	435	450	465	480	495	510	525	540	555	570	585	600	615	630	645	660	675	690	705
1	T. fusca cutinase	0	0.0782871	0.185184	0.182395	0.178675	0.174628	0.177055	0.180267	0.181594	0.183694	0.187177	0.188368	0.190807	0.191185	0.193375	0.193194	0.195198	0.195136	0.197157	0.196858	0.198659	0.197931	0.199884	0.198868	0.200392	0.199359	0.201561	0.200669	0.202198	0.201538	0.202893	0.201956	0.203158	0.202012	0.203576	0.20287	0.204445	0.203565	0.204728	0.203886	0.205332	0.204287	0.205969	0.20501	0.206421	0.205377	0.206873	0.205755
2	I. sakiensis PETase	0	0.131058	0.189723	0.155953	0.124645	0.11226	0.111097	0.113349	0.121586	0.124803	0.131036	0.138589	0.140988	0.143015	0.146876	0.149348	0.151448	0.152041	0.15378	0.15387	0.155615	0.155468	0.156382	0.155925	0.156727	0.155739	0.157015	0.156315	0.157607	0.157223	0.158533	0.157003	0.1568	0.154203	0.155349	0.155005	0.156507	0.155609	0.15632	0.155163	0.156512	0.155541	0.155665	0.155129	0.15566	0.154898	0.155727	0.155039
10	Geobacillus stearothermophilis esterase	0	0.0237661	0.111921	0.158166	0.183773	0.197287	0.208081	0.215363	0.22216	0.226936	0.231937	0.235584	0.239637	0.242528	0.246174	0.2485	0.25156	0.253524	0.256121	0.257792	0.260152	0.261495	0.26355	0.264769	0.266542	0.267378	0.269399	0.270144	0.271589	0.272323	0.273587	0.274174	0.275326	0.275744	0.27694	0.277313	0.278374	0.278657	0.279481	0.279673	0.280576	0.280734	0.281637	0.28175	0.28236	0.282394	0.283003	0.283026
11	Bacillus subilis esterase	0	0.0318161	0.0714904	0.0911129	0.109223	0.123787	0.132097	0.138634	0.143895	0.148366	0.151629	0.154565	0.155163	0.158268	0.159668	0.161294	0.161057	0.162897	0.163428	0.16459	0.163834	0.164997	0.165076	0.166092	0.165426	0.166747	0.166295	0.167458	0.166826	0.167921	0.167029	0.168361	0.167413	0.168836	0.168023	0.169005	0.168226	0.169344	0.168429	0.169502	0.168576	0.169852	0.168971	0.170202	0.169321	0.170157	0.169265	0.170213
	MasterMix+BHET	0	2.50696e-17	0.0350113	0.0432984	0.0455791	0.047092	0.0477016	0.0472387	0.0471484	0.0466065	0.0465726	0.0452403	0.0454887	0.0444274	0.0437613	0.0412662	0.041842	0.033871	0.0329452	0.0359823	0.0364903	0.0376532	0.0368403	0.0395274	0.0381049	0.0422032	0.0430162	0.0432871	0.0454549	0.044642	0.045071	0.0479162	0.0469565	0.0501291	0.0509984	0.0532113	0.0537871	0.0565307	0.057321	0.0592178	0.0601323	0.0624242	0.0635194	0.0657887	0.0664097	0.068521	0.0693678	0.0710387
	MaserMix No BHET	0	-0.0127016	0.0232694	0.0312742	0.0331032	0.0337355	0.0340629	0.034029	0.0335661	0.0333855	0.0331597	0.0331032	0.0321774	0.031579	0.0320194	0.0313871	0.0311274	0.0257419	0.0249065	0.0260694	0.0259113	0.0268597	0.0263065	0.0275145	0.0265323	0.0286097	0.0289032	0.0282597	0.0298516	0.0311613	0.0310032	0.0323581	0.0311952	0.0328661	0.0331823	0.0341532	0.0342436	0.0355307	0.0358807	0.0368629	0.0372581	0.0382403	0.0386355	0.0397871	0.0399565	0.0409161	0.0410629	0.0419549
[truncated: 49 more columns]

## Sheet: mM Ester Cleaved
	Time (min)	0	14.9998	29.9998	44.9998	59.9998	74.9998	89.9998	105	120	135	150	165	180	195	210	225	240	255	270	285	300	315	330	345	360	375	390	405	420	435	450	465	480	495	510	525	540	555	570	585	600	615	630	645	660	675	690	705
	Hours	0	0.249997	0.499997	0.749997	0.999997	1.25	1.5	1.75	2	2.25	2.5	2.75	3	3.25	3.5	3.75	4	4.25	4.5	4.75	5	5.25	5.5	5.75	6	6.25	6.5	6.75	7	7.25	7.5	7.75	8	8.25	8.5	8.75	9	9.25	9.5	9.75	10	10.25	10.5	10.75	11	11.25	11.5	11.75
1	T. fusca cutinase	0	0.472274	0.96713	0.89092	0.846718	0.809291	0.831646	0.857896	0.865517	0.882113	0.912089	0.920388	0.936307	0.940202	0.954767	0.94867	0.962049	0.95917	0.975089	0.966791	0.982541	0.97221	0.987113	0.975936	0.989146	0.977121	0.993041	0.982202	0.995242	0.985251	0.996428	0.985251	0.995242	0.981863	0.994226	0.985928	0.999307	0.988807	0.998968	0.988638	1.00117	0.988807	1.00337	0.992194	1.00507	0.993041	1.00676	0.994565
2	I. sakiensis PETase	0	0.647387	0.982033	0.815049	0.676178	0.648404	0.69921	0.732573	0.77271	0.793371	0.842146	0.873646	0.885331	0.902775	0.919371	0.923097	0.934613	0.93275	0.94325	0.93817	0.949517	0.942404	0.950871	0.94325	0.952734	0.942065	0.954259	0.945452	0.95375	0.94596	0.953412	0.940371	0.945791	0.930888	0.940541	0.93021	0.939355	0.928347	0.93546	0.922081	0.931734	0.917509	0.927331	0.917	0.925468	0.915815	0.922759	0.913613
10	Geobacillus stearothermophilis esterase	0	0.118097	0.568129	0.806242	0.945678	1.01071	1.06626	1.10002	1.13581	1.15692	1.18424	1.20039	1.22252	1.23471	1.25481	1.26452	1.28145	1.28936	1.3046	1.31092	1.32447	1.32955	1.3414	1.34558	1.35597	1.35845	1.37042	1.37211	1.38126	1.38329	1.39097	1.39266	1.39977	1.40011	1.4079	1.40768	1.4149	1.41479	1.42066	1.41987	1.42552	1.42518	1.43105	1.42981	1.43455	1.43308	1.4376	1.43636
11	Bacillus subilis esterase	0	0.166307	0.372355	0.47171	0.563274	0.640726	0.683291	0.719871	0.751146	0.779033	0.795291	0.811436	0.80771	0.827129	0.832323	0.844065	0.837178	0.849033	0.850952	0.858742	0.851065	0.860888	0.858742	0.867888	0.858742	0.872291	0.864162	0.875904	0.867097	0.878613	0.869242	0.882	0.872404	0.884936	0.876242	0.885952	0.876694	0.887646	0.878613	0.887759	0.878388	0.890017	0.879629	0.891823	0.882339	0.891259	0.881436	0.89092
	MasterMix+BHET (G04)	0	0	0.175113	0.219145	0.234049	0.24229	0.244661	0.245	0.241049	0.239919	0.240371	0.233258	0.230323	0.214742	0.22829	0.200968	0.220952	0.163371	0.153887	0.167774	0.166645	0.170484	0.161565	0.179855	0.1645	0.195774	0.194984	0.193516	0.208871	0.192161	0.188887	0.210339	0.196226	0.219371	0.221742	0.23721	0.237549	0.256629	0.259226	0.274242	0.276613	0.291516	0.295355	0.312065	0.314097	0.328097	0.331145	0.342774
	MaserMix No BHET	0	0.0487742	0.218581	0.264758	0.277403	0.281694	0.283726	0.282823	0.277403	0.275258	0.272323	0.27221	0.262613	0.256178	0.259903	0.253129	0.250419	0.197016	0.187871	0.199387	0.197355	0.206726	0.200629	0.212936	0.203452	0.223661	0.224903	0.218355	0.234952	0.247032	0.245226	0.259113	0.247484	0.26329	0.266339	0.275484	0.276274	0.28892	0.292758	0.30179	0.305403	0.314549	0.318613	0.329452	0.33171	0.340742	0.343113	0.350903
	Time (min)	0	14.9998	29.9998	44.9998	59.9998	74.9998	89.9998	105	120	135	150	165	180	195	210	225	240	255	270	285	300	315	330	345	360	375	390	405	420	435	450	465	480	495	510	525	540	555	570	585	600	615	630	645	660	675	690	705
1	T. fusca cutinase	0	0.310597	0.88471	0.933033	0.940033	0.936984	0.938904	0.944775	0.95042	0.954823	0.959678	0.963291	0.971759	0.971646	0.978984	0.983275	0.989936	0.992194	0.996484	1.00179	1.00405	1.0071	1.01173	1.01274	1.01477	1.01647	1.02257	1.02448	1.02674	1.03013	1.0325	1.03431	1.03634	1.03826	1.04153	1.04277	1.04515	1.04684	1.04831	1.05023	1.05215	1.05407	1.05632	1.0579	1.05915	1.06073	1.06197	1.06298
2	I. sakiensis PETase	0	0.663194	0.915194	0.744484	0.570274	0.474194	0.411758	0.40092	0.443145	0.454662	0.46821	0.512242	0.524549	0.527371	0.549387	0.570387	0.579871	0.587662	0.594549	0.600533	0.606629	0.612275	0.612952	0.616	0.614533	0.615323	0.615887	0.617694	0.622323	0.626275	0.63192	0.629662	0.62221	0.611145	0.612952	0.619839	0.62571	0.627742	0.627742	0.629549	0.633387	0.637904	0.629323	0.634291	0.631129	0.633162	0.634516	0.636775
10	Geobacillus stearothermophilis esterase	0	0.119565	0.551081	0.77542	0.892049	0.962162	1.01455	1.05361	1.08579	1.11244	1.13513	1.15545	1.17386	1.19057	1.20694	1.22048	1.23415	1.24589	1.25661	1.267	1.27705	1.2854	1.2941	1.30211	1.30945	1.31532	1.32357	1.32932	1.33463	1.33994	1.3449	1.34908	1.35348	1.35732	1.3615	1.36545	1.36884	1.37177	1.37415	1.37686	1.38024	1.38216	1.38532	1.38769	1.38905	1.39086	1.39244	1.3939
11	Bacillus subilis esterase	0	0.151855	0.342549	0.43942	0.528952	0.597145	0.637678	0.666468	0.687807	0.704629	0.721	0.73421	0.74392	0.755549	0.764355	0.768871	0.773387	0.779936	0.783323	0.787162	0.787275	0.789081	0.792017	0.793033	0.795517	0.795178	0.798791	0.798678	0.801162	0.800597	0.801049	0.801613	0.801726	0.80342	0.803984	0.804097	0.805565	0.805791	0.805678	0.807258	0.807371	0.8085	0.810081	0.810194	0.810871	0.810307	0.81121	0.81121
	MasterMix+BHET	0	2.50696e-16	0.175	0.213839	0.221742	0.228629	0.232355	0.227387	0.230436	0.226145	0.225355	0.219145	0.224565	0.229532	0.209323	0.211694	0.197468	0.175339	0.175565	0.192048	0.198258	0.206048	0.206839	0.215419	0.216548	0.226258	0.235178	0.239355	0.245678	0.254258	0.261823	0.268823	0.273339	0.281919	0.288242	0.294903	0.300323	0.308678	0.313984	0.317936	0.32471	0.332726	0.339839	0.345823	0.35	0.357113	0.362532	0.367613
	MaserMix No BHET	0	-0.17579	0.0141129	0.0479839	0.0536291	0.0556613	0.0569033	0.0574678	0.0582581	0.0585968	0.0592742	0.0588226	0.0591613	0.0596129	0.0602904	0.060742	0.0608549	0.0604033	0.0611936	0.0613065	0.0617581	0.061871	0.0624355	0.0622097	0.061871	0.0624355	0.0641291	0.064242	0.0635645	0.0645807	0.0648065	0.0644678	0.0644678	0.065371	0.0654839	0.0660484	0.0661613	0.0663871	0.0660484	0.0668387	0.0671775	0.0678549	0.067742	0.0684194	0.0678549	0.0684194	0.0675162	0.0686452
	Average
	Time (min)	0	14.9998	29.9998	44.9998	59.9998	74.9998	89.9998	105	120	135	150	165	180	195	210	225	240	255	270	285	300	315	330	345	360	375	390	405	420	435	450	465	480	495	510	525	540	555	570	585	600	615	630	645	660	675	690	705
1	T. fusca cutinase	0	0.391436	0.92592	0.911976	0.893375	0.873138	0.885275	0.901335	0.907968	0.918468	0.935884	0.941839	0.954033	0.955924	0.966875	0.965972	0.975992	0.975682	0.985787	0.984291	0.993295	0.989654	0.99942	0.994339	1.00196	0.996795	1.0078	1.00334	1.01099	1.00769	1.01446	1.00978	1.01579	1.01006	1.01788	1.01435	1.02223	1.01782	1.02364	1.01943	1.02666	1.02144	1.02985	1.02505	1.03211	1.02688	1.03436	1.02877
2	I. sakiensis PETase	0	0.655291	0.948613	0.779767	0.623226	0.561299	0.555484	0.566746	0.607928	0.624016	0.655178	0.692944	0.70494	0.715073	0.734379	0.746742	0.757242	0.760206	0.7689	0.769351	0.778073	0.777339	0.781912	0.779625	0.783633	0.778694	0.785073	0.781573	0.788037	0.786117	0.792666	0.785017	0.784	0.771017	0.776746	0.775025	0.782533	0.778045	0.781601	0.775815	0.782561	0.777706	0.778327	0.775646	0.778299	0.774488	0.778637	0.775194
10	Geobacillus stearothermophilis esterase	0	0.118831	0.559605	0.790831	0.918863	0.986436	1.0404	1.07682	1.1108	1.13468	1.15969	1.17792	1.19819	1.21264	1.23087	1.2425	1.2578	1.26762	1.28061	1.28896	1.30076	1.30748	1.31775	1.32385	1.33271	1.33689	1.34699	1.35072	1.35794	1.36161	1.36794	1.37087	1.37663	1.37872	1.3847	1.38657	1.39187	1.39328	1.3974	1.39836	1.40288	1.40367	1.40819	1.40875	1.4118	1.41197	1.41502	1.41513
11	Bacillus subilis esterase	0	0.159081	0.357452	0.455565	0.546113	0.618936	0.660484	0.69317	0.719476	0.741831	0.758146	0.772823	0.775815	0.791339	0.798339	0.806468	0.805283	0.814484	0.817138	0.822952	0.81917	0.824984	0.825379	0.83046	0.827129	0.833734	0.831476	0.837291	0.834129	0.839605	0.835146	0.841807	0.837065	0.844178	0.840113	0.845025	0.841129	0.846718	0.842146	0.847508	0.842879	0.849258	0.844855	0.851008	0.846605	0.850783	0.846323	0.851065
	MasterMix+BHET	0	1.25348e-16	0.175057	0.216492	0.227895	0.23546	0.238508	0.236194	0.235742	0.233032	0.232863	0.226202	0.227444	0.222137	0.218807	0.206331	0.20921	0.169355	0.164726	0.179911	0.182452	0.188266	0.184202	0.197637	0.190524	0.211016	0.215081	0.216436	0.227274	0.22321	0.225355	0.239581	0.234782	0.250645	0.254992	0.266057	0.268936	0.282653	0.286605	0.296089	0.300661	0.312121	0.317597	0.328944	0.332049	0.342605	0.346839	0.355194
	MaserMix No BHET	0	-0.0635081	0.116347	0.156371	0.165516	0.168678	0.170315	0.170145	0.167831	0.166928	0.165798	0.165516	0.160887	0.157895	0.160097	0.156936	0.155637	0.12871	0.124532	0.130347	0.129557	0.134298	0.131532	0.137573	0.132661	0.143048	0.144516	0.141298	0.149258	0.155807	0.155016	0.16179	0.155976	0.164331	0.165911	0.170766	0.171218	0.177653	0.179403	0.184315	0.18629	0.191202	0.193178	0.198936	0.199782	0.204581	0.205315	0.209774
[truncated: 50 more columns]

## Sheet: STDEV
	STDEV of ∆ABS
	Hours	0	0.25	0.5	0.75	1	1.25	1.5	1.75	2	2.25	2.5	2.75	3	3.25	3.5	3.75	4	4.25	4.5	4.75	5	5.25	5.5	5.75	6	6.25	6.5	6.75	7	7.25	7.5	7.75	8	8.25	8.5	8.75	9	9.25	9.5	9.75	10	10.25	10.5	10.75	11	11.25	11.5	11.75
1	T. fusca cutinase	0	0.00223681	0.00112694	0.00119304	0.00259294	0.0031749	0.00360185	0.00479305	0.00455741	0.00725695	0.00754078	0.00705148	0.00754387	0.00825974	0.00821361	0.00849235	0.00759561	0.00837874	0.00752485	0.0084788	0.00727278	0.00819898	0.00735731	0.00852428	0.00720208	0.00823063	0.00737292	0.00832106	0.00727622	0.00814023	0.00738941	0.00816844	0.0072968	0.00800187	0.00727942	0.00824035	0.00740968	0.00828312	0.00724592	0.00803264	0.00714306	0.00814269	0.0072298	0.0081304	0.00732598	0.0081185	0.00724592	0.0081185
2	I. sakiensis PETase	0	0.00141421	0.0173948	0.00381838	0.019799	0.0281428	0.0194454	0.0333754	0.0274357	0.0268701	0.0299813	0.0286378	0.0312541	0.030547	0.033234	0.0301227	0.0335876	0.0293449	0.0333047	0.0291328	0.0330926	0.0292742	0.0328805	0.0290621	0.033234	0.0292742	0.0330926	0.030052	0.032739	0.0301935	0.0321026	0.0299813	0.0326683	0.0296278	0.0304056	0.0274357	0.0287792	0.0269408	0.02786	0.0249609	0.0272236	0.0225567	0.0255973	0.021496	0.0253851	0.0200818	0.0240416	0.0198697
12	Geobacillus stearothermophilis esterase	0	0.00167432	0.00410528	0.00522717	0.00640807	0.00712905	0.00783518	0.00794628	0.0086	0.00857049	0.00894558	0.00919474	0.00950386	0.00954096	0.00967953	0.00991581	0.00997146	0.0101926	0.0101796	0.01025	0.0106641	0.010514	0.0108167	0.0108307	0.0110268	0.0108721	0.0111635	0.0112055	0.0111357	0.0113715	0.0113618	0.0113618	0.0115659	0.0114	0.011582	0.0115396	0.0117772	0.0116372	0.0119056	0.0117529	0.0117529	0.0119056	0.0120239	0.0119605	0.0121014	0.0119976	0.0121445	0.0121562
13	Bacillus subilis esterase	0	0.00539475	0.00416333	0.0043715	0.00543538	0.00762649	0.00869042	0.010981	0.011308	0.0114687	0.00893103	0.0195147	0.0104532	0.0135692	0.00987472	0.0156992	0.0107909	0.0126777	0.00980833	0.0140998	0.00973156	0.0122541	0.00925113	0.0136566	0.00884609	0.013338	0.0090934	0.0134309	0.0093723	0.0142131	0.00931504	0.0135832	0.00947066	0.0139474	0.0101195	0.0146323	0.0105879	0.0154405	0.0101769	0.0154371	0.0101491	0.0150609	0.00963172	0.0150901	0.00982768	0.0152658	0.0100724	0.0154351
	MasterMix+BHET (G04)	0	0.00115326	0.00291033	0.00306431	0.00362261	0.00337095	0.00360046	0.00959653	0.00332916	0.00697161	0.00306159	0.00833547	0.00560268	0.00970773	0.00263502	0.0140319	0.0392332	0.0431528	0.0408071	0.0443805	0.0376321	0.037739	0.0361352	0.0347923	0.0354791	0.0353545	0.0319988	0.0332885	0.024665	0.0269077	0.0244884	0.0231554	0.0226487	0.0252463	0.0225136	0.0221184	0.0199003	0.0210339	0.0180794	0.0194896	0.0175799	0.0169679	0.0153393	0.0153053	0.0132081	0.0136552	0.0114053	0.0106588
	MaserMix No BHET	0	0.00530786	0.00509542	0.00497293	0.0049339	0.004993	0.00495715	0.00497896	0.00501431	0.00509346	0.00520801	0.00511599	0.00490951	0.00499032	0.00516269	0.00517333	0.00508167	0.00499032	0.00507182	0.00492375	0.0049813	0.00485901	0.00501431	0.00486621	0.00500033	0.00494874	0.00496689	0.00488501	0.0049813	0.00492375	0.00500033	0.00482735	0.00475114	0.0049813	0.00503885	0.00491155	0.005058	0.0047655	0.00482113	0.00488092	0.00496622	0.00496924	0.0047697	0.00473427	0.00485901	0.00485386	0.00485077	0.00484974
	Hours	0	0.25	0.5	0.75	1	1.25	1.5	1.75	2	2.25	2.5	2.75	3	3.25	3.5	3.75	4	4.25	4.5	4.75	5	5.25	5.5	5.75	6	6.25	6.5	6.75	7	7.25	7.5	7.75	8	8.25	8.5	8.75	9	9.25	9.5	9.75	10	10.25	10.5	10.75	11	11.25	11.5	11.75
1	T. fusca cutinase	0	0.0063343	0.00892879	0.00803181	0.00882968	0.0115279	0.0121632	0.00902792	0.00923165	0.00915278	0.0103621	0.0103036	0.00938634	0.00872296	0.00906936	0.00843169	0.00864812	0.00882742	0.00862168	0.00864176	0.00784496	0.00794754	0.0078015	0.00783986	0.00760548	0.00665833	0.0072473	0.00735119	0.00739076	0.00724523	0.00722934	0.00721318	0.00709295	0.00722795	0.00706069	0.00695414	0.00701498	0.00699357	0.00690097	0.0069347	0.00704651	0.00704012	0.00695414	0.00698737	0.00690097	0.00669552	0.00678847	0.00673003
2	I. sakiensis PETase	0	0.0189867	0.0176902	0.0314359	0.0312333	0.0273229	0.0364	0.0464685	0.0604277	0.0718042	0.0818642	0.087679	0.0909309	0.0911236	0.0965013	0.0958132	0.092581	0.0915806	0.090661	0.090239	0.0899424	0.0888386	0.0855237	0.0851604	0.083358	0.0818607	0.081057	0.0793227	0.0782285	0.0749876	0.0730351	0.0720201	0.069007	0.0655103	0.0659088	0.0675023	0.0686324	0.0689838	0.0680303	0.068073	0.0685275	0.0695205	0.065367	0.067102	0.065622	0.0648	0.0642106	0.0633491
10	Geobacillus stearothermophilis esterase	0	0.0121706	0.00730502	0.00662143	0.00675352	0.0062554	0.00516172	0.00481352	0.00459021	0.00450814	0.00437531	0.00424774	0.00415812	0.00416813	0.00421228	0.00398288	0.00386264	0.00381881	0.00377536	0.00363456	0.00368963	0.00367741	0.00350286	0.00366106	0.00342685	0.00339755	0.00343948	0.00334215	0.00339755	0.00325935	0.00327414	0.00333067	0.00325935	0.00320364	0.00314802	0.00320364	0.00313422	0.0031628	0.0031628	0.00328684	0.00323471	0.00314802	0.00325935	0.00325935	0.00312143	0.00313422	0.00309246	0.00310698
11	Bacillus subilis esterase	0	0.00699238	0.0108187	0.00904673	0.00793788	0.00540771	0.00693974	0.0110395	0.0142334	0.0184971	0.0182814	0.0197494	0.0213404	0.0209592	0.0200397	0.0202219	0.0208788	0.0200749	0.0204985	0.0217571	0.0210301	0.0208976	0.0212495	0.0216521	0.0210459	0.0219269	0.0211417	0.0216315	0.021258	0.0207198	0.0212825	0.0214077	0.0213629	0.0211027	0.0219105	0.0222282	0.022026	0.0224014	0.0219973	0.0217847	0.0220932	0.0218157	0.0223757	0.0221663	0.0229472	0.022926	0.0226954	0.0226118
	MasterMix+BHET	0	0.00125033	0.00410731	0.00280238	0.00181934	0.00195533	0.00217332	0.00275923	0.00188768	0.0018	0.00234379	0.00276466	0.00396779	0.0051264	0.0101658	0.00996812	0.0174443	0.0288075	0.0293504	0.0271508	0.0266898	0.0256796	0.0280706	0.0261452	0.0243196	0.0252532	0.0246693	0.0237796	0.0233155	0.0226634	0.0224193	0.0226378	0.0204676	0.0207876	0.019679	0.0192102	0.0187385	0.0178623	0.0172082	0.0180602	0.0156751	0.0155455	0.0148075	0.0143605	0.0132398	0.0130726	0.0126508	0.0122153
	MaserMix No BHET	0	0.0122394	0.0100817	0.0106226	0.0110369	0.0110024	0.010681	0.010608	0.01065	0.0107431	0.010681	0.010686	0.0107014	0.0107431	0.0104006	0.0107072	0.0107177	0.0106444	0.0107014	0.01065	0.0106931	0.0106715	0.0107221	0.0107643	0.0106715	0.0107379	0.0107221	0.010624	0.0105655	0.0106715	0.0105216	0.0107072	0.0105358	0.0104006	0.0106143	0.0105571	0.0105083	0.0107431	0.0108076	0.0106289	0.0106289	0.0104429	0.0104644	0.0105874	0.0106006	0.0104787	0.0105216	0.0106715
	Average
	Hours	0	0.25	0.5	0.75	1	1.25	1.5	1.75	2	2.25	2.5	2.75	3	3.25	3.5	3.75	4	4.25	4.5	4.75	5	5.25	5.5	5.75	6	6.25	6.5	6.75	7	7.25	7.5	7.75	8	8.25	8.5	8.75	9	9.25	9.5	9.75	10	10.25	10.5	10.75	11	11.25	11.5	11.75
1	T. fusca cutinase	0	0.00428556	0.00502787	0.00461242	0.00571131	0.00735142	0.00788252	0.00691049	0.00689453	0.00820486	0.00895144	0.00867752	0.0084651	0.00849135	0.00864148	0.00846202	0.00812187	0.00860308	0.00807326	0.00856028	0.00755887	0.00807326	0.0075794	0.00818207	0.00740378	0.00744448	0.00731011	0.00783612	0.00733349	0.00769273	0.00730937	0.00769081	0.00719488	0.00761491	0.00717006	0.00759724	0.00721233	0.00763834	0.00707344	0.00748367	0.00709479	0.0075914	0.00709197	0.00755888	0.00711347	0.00740701	0.00701719	0.00742426
2	I. sakiensis PETase	0	0.0102004	0.0175425	0.0176271	0.0255162	0.0277329	0.0279227	0.039922	0.0439317	0.0493371	0.0559228	0.0581584	0.0610925	0.0608353	0.0648677	0.062968	0.0630843	0.0604628	0.0619829	0.0596859	0.0615175	0.0590564	0.0592021	0.0571112	0.058296	0.0555674	0.0570748	0.0546874	0.0554838	0.0525905	0.0525689	0.0510007	0.0508377	0.0475691	0.0481572	0.047469	0.0487058	0.0479623	0.0479452	0.0465169	0.0478755	0.0460386	0.0454821	0.044299	0.0455036	0.0424409	0.0441261	0.0416094
13	Geobacillus stearothermophilis esterase	0	0.00692245	0.00570515	0.0059243	0.00658079	0.00669222	0.00649845	0.0063799	0.0065951	0.00653932	0.00666044	0.00672124	0.00683099	0.00685455	0.00694591	0.00694935	0.00691705	0.00700573	0.00697746	0.0069423	0.00717687	0.00709568	0.00715975	0.00724586	0.00722682	0.00713484	0.00730148	0.00727383	0.00726661	0.0073154	0.00731796	0.00734622	0.00741262	0.00730182	0.00736502	0.00737164	0.00745573	0.00739998	0.0075342	0.00751986	0.00749379	0.00752681	0.00764161	0.00760992	0.0076114	0.00756593	0.00761851	0.00763159
14	Bacillus subilis esterase	0	0.00619356	0.00749099	0.00670911	0.00668663	0.0065171	0.00781508	0.0110103	0.0127707	0.0149829	0.0136062	0.0196321	0.0158968	0.0172642	0.0149572	0.0179605	0.0158348	0.0163763	0.0151534	0.0179285	0.0153808	0.0165759	0.0152503	0.0176544	0.014946	0.0176325	0.0151176	0.0175312	0.0153152	0.0174665	0.0152988	0.0174955	0.0154168	0.017525	0.016015	0.0184302	0.0163069	0.018921	0.0160871	0.0186109	0.0161211	0.0184383	0.0160037	0.0186282	0.0163874	0.0190959	0.0163839	0.0190235
	MasterMix+BHET	0	0.00120179	0.00350882	0.00293335	0.00272098	0.00266314	0.00288689	0.00617788	0.00260842	0.0043858	0.00270269	0.00555006	0.00478523	0.00741707	0.00640041	0.012	0.0283387	0.0359801	0.0350788	0.0357656	0.0321609	0.0317093	0.0321029	0.0304688	0.0298994	0.0303039	0.028334	0.028534	0.0239903	0.0247855	0.0234538	0.0228966	0.0215582	0.0230169	0.0210963	0.0206643	0.0193194	0.0194481	0.0176438	0.0187749	0.0166275	0.0162567	0.0150734	0.0148329	0.013224	0.0133639	0.012028	0.011437
	MaserMix No BHET	0	0.00877364	0.00758854	0.00779777	0.0079854	0.00799771	0.00781906	0.00779349	0.00783218	0.00791826	0.00794449	0.00790098	0.00780546	0.00786669	0.00778166	0.00794025	0.0078997	0.00781736	0.00788661	0.0077869	0.00783722	0.00776523	0.0078682	0.00781525	0.0078359	0.00784334	0.00784449	0.00775452	0.0077734	0.0077976	0.00776095	0.00776726	0.00764348	0.00769097	0.00782657	0.00773435	0.00778312	0.00775428	0.00781435	0.0077549	0.00779756	0.00770605	0.00761704	0.00766084	0.00772982	0.00766629	0.00768617	0.0077606
[truncated: 78 more columns]

## Sheet: StDev mM
	STDEV of ∆ABS
	Hours	0	0.25	0.5	0.75	1	1.25	1.5	1.75	2	2.25	2.5	2.75	3	3.25	3.5	3.75	4	4.25	4.5	4.75	5	5.25	5.5	5.75	6	6.25	6.5	6.75	7	7.25	7.5	7.75	8	8.25	8.5	8.75	9	9.25	9.5	9.75	10	10.25	10.5	10.75	11	11.25	11.5	11.75
1	T. fusca cutinase	0	0.00745746	0.00375719	0.00397754	0.00864477	0.010585	0.0120085	0.0159799	0.0151943	0.0241944	0.0251407	0.0235094	0.025151	0.0275377	0.0273839	0.0283132	0.0253235	0.0279345	0.0250876	0.028268	0.0242472	0.0273351	0.024529	0.0284197	0.0240115	0.0274407	0.0245811	0.0277421	0.0242587	0.0271393	0.024636	0.0272333	0.0243273	0.026678	0.0242694	0.0274731	0.0247036	0.0276156	0.0241577	0.0267806	0.0238147	0.0271475	0.0241039	0.0271065	0.0244246	0.0270668	0.0241577	0.0270668
2	I. sakiensis PETase	0	0.00471494	0.0579938	0.0127303	0.0660092	0.0938273	0.0648305	0.111273	0.0914699	0.0895839	0.0999568	0.0954776	0.1042	0.101843	0.110801	0.100428	0.11198	0.097835	0.111037	0.0971278	0.11033	0.0975993	0.109622	0.0968921	0.110801	0.0975993	0.11033	0.100193	0.109151	0.100664	0.107029	0.0999568	0.108915	0.098778	0.101371	0.0914699	0.0959491	0.0898196	0.0928844	0.0832187	0.0907626	0.0752033	0.0853405	0.0716671	0.0846332	0.0669522	0.080154	0.0662449
10	Geobacillus stearothermophilis esterase	0	0.00558211	0.0136869	0.0174272	0.0213643	0.023768	0.0261222	0.0264926	0.0286721	0.0285737	0.0298243	0.030655	0.0316856	0.0318093	0.0322712	0.033059	0.0332445	0.0339819	0.0339383	0.0341733	0.0355538	0.0350532	0.0360624	0.0361091	0.0367629	0.0362473	0.0372187	0.0373588	0.037126	0.0379121	0.0378798	0.0378798	0.0385603	0.0380072	0.0386141	0.0384728	0.0392649	0.0387979	0.0396929	0.0391837	0.0391837	0.0396929	0.0400872	0.0398759	0.0403456	0.0399997	0.0404895	0.0405284
11	Bacillus subilis esterase	0	0.0179859	0.0138804	0.0145744	0.0181214	0.0254265	0.0289736	0.0366104	0.0377004	0.0382361	0.0297758	0.0650614	0.0348507	0.0452393	0.032922	0.0523405	0.0359765	0.0422669	0.0327007	0.0470082	0.0324447	0.0408548	0.030843	0.0455307	0.0294926	0.0444686	0.0303171	0.0447783	0.0312469	0.0473861	0.031056	0.0452859	0.0315749	0.0465002	0.0337379	0.0487835	0.0352997	0.0514782	0.0339296	0.0514667	0.0338366	0.0502125	0.0321118	0.0503098	0.0327652	0.0508955	0.0335811	0.0514602
	MasterMix+BHET	0	0.00384492	0.00970293	0.0102163	0.0120777	0.0112387	0.0120038	0.0319945	0.0110993	0.0232431	0.0102072	0.0277902	0.0186791	0.0323653	0.00878507	0.0467818	0.130802	0.14387	0.13605	0.147963	0.125464	0.125821	0.120473	0.115996	0.118286	0.117871	0.106683	0.110983	0.0822324	0.0897093	0.0816434	0.0771994	0.07551	0.0841702	0.0750597	0.073742	0.0663471	0.0701262	0.060276	0.0649776	0.0586109	0.0565705	0.0511406	0.0510275	0.0440353	0.0455259	0.0380248	0.0355361
	MaserMix No BHET	0	0.0176962	0.016988	0.0165796	0.0164495	0.0166465	0.016527	0.0165997	0.0167176	0.0169814	0.0173633	0.0170565	0.0163682	0.0166376	0.0172122	0.0172477	0.0169421	0.0166376	0.0169093	0.0164156	0.0166075	0.0161998	0.0167176	0.0162238	0.0166709	0.0164989	0.0165595	0.0162865	0.0166075	0.0164156	0.0166709	0.0160942	0.0158401	0.0166075	0.0167994	0.016375	0.0168632	0.015888	0.0160735	0.0162728	0.0165572	0.0165673	0.015902	0.0157839	0.0161998	0.0161826	0.0161723	0.0161689
	STDEV of ∆ABS
	Hours	0	0.25	0.5	0.75	1	1.25	1.5	1.75	2	2.25	2.5	2.75	3	3.25	3.5	3.75	4	4.25	4.5	4.75	5	5.25	5.5	5.75	6	6.25	6.5	6.75	7	7.25	7.5	7.75	8	8.25	8.5	8.75	9	9.25	9.5	9.75	10	10.25	10.5	10.75	11	11.25	11.5	11.75
1	T. fusca cutinase	0	0.0211183	0.0297683	0.0267778	0.0294379	0.0384338	0.0405517	0.0300988	0.030778	0.0305151	0.0345469	0.0343517	0.0312937	0.0290821	0.030237	0.028111	0.0288326	0.0294303	0.0287444	0.0288113	0.0261548	0.0264968	0.0260099	0.0261378	0.0253564	0.0221986	0.0241623	0.0245086	0.0246406	0.0241554	0.0241024	0.0240485	0.0236477	0.0240978	0.0235401	0.0231849	0.0233877	0.0233163	0.0230076	0.02312	0.0234928	0.0234715	0.0231849	0.0232957	0.0230076	0.0223226	0.0226325	0.0224377
2	I. sakiensis PETase	0	0.0633009	0.0589786	0.104806	0.104131	0.0910938	0.121356	0.154924	0.201464	0.239393	0.272933	0.292319	0.303161	0.303803	0.321732	0.319438	0.308662	0.305327	0.302261	0.300854	0.299865	0.296185	0.285133	0.283922	0.277913	0.272921	0.270242	0.264459	0.260811	0.250006	0.243497	0.240113	0.230067	0.218409	0.219738	0.225051	0.228818	0.22999	0.226811	0.226953	0.228468	0.231779	0.217931	0.223716	0.218782	0.216041	0.214076	0.211204
10	Geobacillus stearothermophilis esterase	0	0.0405764	0.0243547	0.0220756	0.022516	0.0208553	0.017209	0.0160481	0.0153036	0.01503	0.0145871	0.0141618	0.0138631	0.0138964	0.0140436	0.0132788	0.0128779	0.0127318	0.0125869	0.0121175	0.0123011	0.0122604	0.0116784	0.0122058	0.011425	0.0113273	0.0114671	0.0111426	0.0113273	0.0108666	0.0109159	0.0111043	0.0108666	0.0106808	0.0104954	0.0106808	0.0104494	0.0105447	0.0105447	0.0109582	0.0107844	0.0104954	0.0108666	0.0108666	0.0104068	0.0104494	0.0103102	0.0103586
11	Bacillus subilis esterase	0	0.0233124	0.0360691	0.0301615	0.0264646	0.0180291	0.0231369	0.0368053	0.0474537	0.0616688	0.0609496	0.065844	0.0711483	0.0698774	0.0668117	0.067419	0.0696092	0.0669289	0.0683415	0.0725376	0.0701135	0.0696719	0.0708453	0.0721874	0.0701664	0.0731037	0.0704859	0.0721188	0.0708735	0.0690791	0.070955	0.0713726	0.0712232	0.0703557	0.0730489	0.0741081	0.0734339	0.0746856	0.0733382	0.0726295	0.0736581	0.0727327	0.0745997	0.0739016	0.0765052	0.0764347	0.0756659	0.075387
	MasterMix+BHET	0	0.00416857	0.0136936	0.00934304	0.00606562	0.00651902	0.00724579	0.00919917	0.00629346	0.00600114	0.00781411	0.00921728	0.0132285	0.0170913	0.0338924	0.0332334	0.0581587	0.0960432	0.0978531	0.0905197	0.0889828	0.085615	0.0935866	0.0871674	0.0810808	0.0841933	0.0822466	0.0792805	0.0777332	0.0755591	0.0747451	0.0754737	0.0682384	0.0693051	0.0656092	0.064046	0.0624734	0.0595525	0.0573717	0.060212	0.0522604	0.0518283	0.0493679	0.0478774	0.0441412	0.0435837	0.0421774	0.0407254
	MaserMix No BHET	0	0.0408058	0.0336119	0.0354155	0.0367967	0.0366817	0.03561	0.0353668	0.0355069	0.035817	0.03561	0.0356267	0.0356781	0.035817	0.0346754	0.0356973	0.0357326	0.0354881	0.0356781	0.0355069	0.0356506	0.0355783	0.0357471	0.0358878	0.0355783	0.0357999	0.0357471	0.0354202	0.0352251	0.0355783	0.0350786	0.0356973	0.0351261	0.0346754	0.0353877	0.0351972	0.0350342	0.035817	0.0360321	0.0354364	0.0354364	0.0348162	0.0348879	0.0352981	0.0353422	0.0349357	0.0350786	0.0355783
	Average
	Hours	0	0.25	0.5	0.75	1	1.25	1.5	1.75	2	2.25	2.5	2.75	3	3.25	3.5	3.75	4	4.25	4.5	4.75	5	5.25	5.5	5.75	6	6.25	6.5	6.75	7	7.25	7.5	7.75	8	8.25	8.5	8.75	9	9.25	9.5	9.75	10	10.25	10.5	10.75	11	11.25	11.5	11.75
1	T. fusca cutinase	0	0.0142879	0.0167627	0.0153777	0.0190413	0.0245094	0.0262801	0.0230393	0.0229861	0.0273548	0.0298438	0.0289306	0.0282224	0.0283099	0.0288104	0.0282121	0.027078	0.0286824	0.026916	0.0285397	0.025201	0.026916	0.0252695	0.0272787	0.024684	0.0248197	0.0243717	0.0261254	0.0244496	0.0256473	0.0243692	0.0256409	0.0239875	0.0253879	0.0239047	0.025329	0.0240457	0.025466	0.0235826	0.0249503	0.0236538	0.0253095	0.0236444	0.0252011	0.0237161	0.0246947	0.0233951	0.0247523
2	I. sakiensis PETase	0	0.0340079	0.0584862	0.0587682	0.08507	0.0924606	0.0930934	0.133099	0.146467	0.164488	0.186445	0.193898	0.20368	0.202823	0.216267	0.209933	0.210321	0.201581	0.206649	0.198991	0.205097	0.196892	0.197378	0.190407	0.194357	0.18526	0.190286	0.182326	0.184981	0.175335	0.175263	0.170035	0.169491	0.158594	0.160555	0.15826	0.162384	0.159905	0.159848	0.155086	0.159615	0.153491	0.151636	0.147692	0.151707	0.141497	0.147115	0.138724
10	Geobacillus stearothermophilis esterase	0	0.0230792	0.0190208	0.0197514	0.0219401	0.0223117	0.0216656	0.0212704	0.0219879	0.0218019	0.0222057	0.0224084	0.0227743	0.0228528	0.0231574	0.0231689	0.0230612	0.0233569	0.0232626	0.0231454	0.0239275	0.0236568	0.0238704	0.0241575	0.024094	0.0237873	0.0243429	0.0242507	0.0242267	0.0243893	0.0243978	0.0244921	0.0247134	0.024344	0.0245547	0.0245768	0.0248572	0.0246713	0.0251188	0.025071	0.0249841	0.0250941	0.0254769	0.0253712	0.0253762	0.0252246	0.0253998	0.0254435
11	Bacillus subilis esterase	0	0.0206491	0.0249747	0.022368	0.022293	0.0217278	0.0260552	0.0367078	0.0425771	0.0499525	0.0453627	0.0654527	0.0529995	0.0575584	0.0498669	0.0598797	0.0527928	0.0545979	0.0505211	0.0597729	0.0512791	0.0552634	0.0508441	0.0588591	0.0498295	0.0587861	0.0504015	0.0584486	0.0510602	0.0582326	0.0510055	0.0583293	0.051399	0.0584279	0.0533934	0.0614458	0.0543668	0.0630819	0.0536339	0.0620481	0.0537473	0.0614726	0.0533558	0.0621057	0.0546352	0.0636651	0.0546235	0.0634236
	MasterMix+BHET	0	0.00400674	0.0116983	0.00977968	0.00907165	0.00887884	0.00962481	0.0205968	0.00869639	0.0146221	0.00901067	0.0185037	0.0159538	0.0247283	0.0213387	0.0400076	0.0944804	0.119957	0.116951	0.119241	0.107223	0.105718	0.10703	0.101582	0.0996836	0.101032	0.0944648	0.0951316	0.0799828	0.0826342	0.0781943	0.0763365	0.0718742	0.0767376	0.0703344	0.068894	0.0644102	0.0648393	0.0588239	0.0625948	0.0554356	0.0541994	0.0502543	0.0494524	0.0440882	0.0445548	0.0401011	0.0381307
	MaserMix No BHET	0	0.029251	0.0253	0.0259975	0.0266231	0.0266641	0.0260685	0.0259832	0.0261122	0.0263992	0.0264867	0.0263416	0.0260231	0.0262273	0.0259438	0.0264725	0.0263374	0.0260628	0.0262937	0.0259613	0.026129	0.025889	0.0262323	0.0260558	0.0261246	0.0261494	0.0261533	0.0258533	0.0259163	0.025997	0.0258748	0.0258958	0.0254831	0.0256414	0.0260935	0.0257861	0.0259487	0.0258525	0.0260528	0.0258546	0.0259968	0.0256917	0.025395	0.025541	0.025771	0.0255592	0.0256254	0.0258736
[truncated: 49 more columns]

## Sheet: Specific Activity
		mM/min	µM/min	µM/min/µM enzyme
1	T. fusca cutinase	0.0218	21.8	1.09
2	I. sakiensis PETase	0.0176	17.6	0.88
10	Geobacillus stearothermophilis esterase	0.0188	18.8	0.94
11	Bacillus subilis esterase	0.0104	10.4	0.52
	MasterMix+BHET	0.0055	5.5	0.275

## Sheet: TTON
1	T. fusca cutinase	10.7873			Enzyme
2	I. sakiensis PETase	7.91847			0.0001	mol	0.0002	L	2e-08	mol
10	Geobacillus stearothermophilis esterase	14.411				L			0.02	µmol
11	Bacillus subilis esterase	8.6117
	MasterMix+BHET	4.96718
