# Supplementary material for: A flexible kinetic assay efficiently sorts prospective biocatalysts for PET plastic subunit hydrolysis
Source: RSC Adv. 2022 Mar 14;12(13):8119–30. doi: 10.1039/d2ra00612j (PMC8982334; doi:10.1039/d2ra00612j)
Supplement: RA-012-D2RA00612J-s037 [file RA-012-D2RA00612J-s037.xlsx]

## Sheet: HPLC pH 8, 37°C
Total Concentrations, pH8 37°C triplicate wells in experimental duplicate plates
E1	Tf				E2	Is				E3	501				E4	702				E5	703				E6	705				E7	707				E8	708				E9	715				E10	Geo
Replicate	BHET	MHET	TPA		Replicate	BHET	MHET	TPA		Replicate	BHET	MHET	TPA		Replicate	BHET	MHET	TPA		Replicate	BHET	MHET	TPA		Replicate	BHET	MHET	TPA		Replicate	BHET	MHET	TPA		Replicate	BHET	MHET	TPA		Replicate	BHET	MHET	TPA		Replicate	BHET	MHET	TPA
1	0	53.765	493.865		1	0	0	562.186		1	0	457.292	104.63		1	0	24.783	531.606		1	0	26.735	522.038		1	0	507.87	53.026		1	116.921	435.167	0.329		1	53.899	501.463	26.201		1	0	23.443	548.994		1	0	0	570.897
2	0	50.772	487.569		2	0	0	546.015		2	0	463.948	110.378		2	0	25.265	516.873		2	0	29.999	521.11		2	0	520.232	49.104		2	109.553	451.522	1.422		2	46.993	487.86	26.043		2	0	18.931	529.698		2	0	0	561.563
3	0	55.036	505.169		3	0	0	539.682		3	0	448.964	127.377		3	0	31.796	532.066		3	0	28.953	519.841		3	0.486	510.069	46.035		3	123.991	463.132	1.193		3	55.747	488.33	27.406		3	0	20.842	527.436		3	0	0	541.831
4	0	52.717	540.407		4	0	0	558.492		4	0	510.518	69.713		4	0	53.393	495.278		4	0	43.499	521.64		4	31.554	511.598	16.662		4	90.259	465.508	3.134		4	34.825	512.344	27.797		4	0	29.251	591.166		4	0	0	614.615
5	0	50.365	496.91		5	0	0	564.039		5	0	516.977	59.639		5	0	49.5	505.701		5	0	36.068	521.438		5	33.992	523.373	17.178		5	86.462	479.121	4.079		5	34.705	508.719	27.438		5	0	24.905	597.765		5	0	0	609.455
6	0	48.487	503.836		6	0	0	554.286		6	0	511.638	62.529		6	0	48.421	496.681		6	0	40.022	519.373		6	30.721	515.552	16.88		6	88.013	499.446	4.921		6	36.154	507.735	25.991		6	0	24.833	590.888		6	0	0	630.053
Average	0	51.857	504.626		Average	0	0	554.117		Average	0	484.889	89.0443		Average	0	38.8597	513.034		Average	0	34.2127	520.907		Average	16.1255	514.782	33.1475		Average	102.533	465.649	2.513		Average	43.7205	501.075	26.8127		Average	0	23.7008	564.325		Average	0	0	588.069
Average diluted HPLC vial concentration
Enzyme	BHET	BHET Error	MHET	MHET Error	TPA	TPA Error	Total mM ester cleaved	Total mM ester cleaved (Zeroed)	Total mM ester cleaved ERROR	Total Error
1	0	0	51.857	0.901331	504.626	6.96714	1.06111	1.0299	0.0070252	0.00366808
2	0	0	0	0	554.117	3.5619	1.10823	1.07702	0.0035619	0.00233232
3	0	0	484.889	11.658	89.0443	10.6834	0.662978	0.631767	0.0158128	0.00629998
4	0	0	38.8597	4.85546	513.034	6.14262	1.06493	1.03372	0.00782989	0.00394309
5	0	0	34.2127	2.49867	520.907	0.39543	1.07603	1.04481	0.00252977	0.00185661
6	16.1255	6.52971	514.782	2.26217	33.1475	6.68182	0.581077	0.549866	0.00705437	0.00452091
7	102.533	6.09303	465.649	8.2644	2.513	0.673692	0.470675	0.439464	0.00829181	0.00473082
8	43.7205	3.63856	501.075	3.96862	26.8127	0.305217	0.554701	0.523489	0.00398034	0.00307522
9	0	0	23.7008	1.33881	564.325	12.1782	1.15235	1.12114	0.0122516	0.00531449
10	0	0	0	0	588.069	12.9744	1.17614	1.14493	0.0129744	0.00552153
11	0	0	186.102	5.55729	404.085	11.2833	0.994272	0.963061	0.0125776	0.00540837
12	447.495	2.39238	127.24	2.66335	0	0	0.12724	0.096028	0.00266335	0.00234025
13	483.705	4.21704	73.461	1.53376	0	0	0.073461	0.0422495	0.00153376	0.00272055
14	0	0	449.267	25.7413	86.5	28.8028	0.622267	0.591056	0.0386292	0.0114273
15	508.842	11.9723	80.1518	3.90575	0	0	0.0801518	0.0489403	0.00390575	0.00541284
16	444.99	1.98638	139.952	3.3937	0	0	0.139952	0.10874	0.0033937	0.00249133
17	0	0	0	0	555.345	2.58001	1.11069	1.07948	0.00258001	0.00188111
18	505.634	4.27805	69.0835	1.3229	0	0	0.0690835	0.037872	0.0013229	0.00271676
t=0	516.1	8.66427	31.2115	12.7453	0	0	0.0312115	0	0.0127453	0.00619291
t=24	476.849	7.99915	105.56	20.1502	0	0	0.10556	0.0743488	0.0201502	0.00777508
Lysate	377.132	27.9552	193.142	37.4558	0	0	0.193142	0.16193	0.0374558	0.0129752
Average undiluted well concentration
Enzyme	TPA mM	TPA Error	MHET mM	MHET Error	BHET mM	BHET Error	Total mM ester cleaved	Total mM ester cleaved Zeroed	Total mM ester cleaved ERROR	Total Error
1	1.00925	0.0139343	0.103714	0.00180266	0	0	2.12222	2.0598	0.0140504	0.00733616
2	1.10823	0.00712379	0	0	0	0	2.21647	2.15404	0.00712379	0.00466463
3	0.178089	0.0213668	0.969779	0.023316	0	0	1.32596	1.26353	0.0316256	0.0126
4	1.02607	0.0122852	0.0777193	0.00971091	0	0	2.12986	2.06743	0.0156598	0.00788619
5	1.04181	0.00079086	0.0684253	0.00499735	0	0	2.15205	2.08963	0.00505954	0.00371322
6	0.066295	0.0133636	1.02956	0.00452434	0.032251	0.0130594	1.16215	1.09973	0.0141087	0.00904182
7	0.005026	0.00134738	0.931299	0.0165288	0.205066	0.0121861	0.941351	0.878928	0.0165836	0.00946165
8	0.0536253	0.000610433	1.00215	0.00793724	0.087441	0.00727712	1.1094	1.04698	0.00796068	0.00615044
9	1.12865	0.0243565	0.0474017	0.00267762	0	0	2.3047	2.24228	0.0245032	0.010629
10	1.17614	0.0259489	0	0	0	0	2.35228	2.28985	0.0259489	0.0110431
11	0.808171	0.0225667	0.372204	0.0111146	0	0	1.98854	1.92612	0.0251553	0.0108167
12	0	0	0.254479	0.00532671	0.894989	0.00478476	0.254479	0.192056	0.00532671	0.00468049
13	0	0	0.146922	0.00306751	0.967411	0.00843409	0.146922	0.084499	0.00306751	0.0054411
14	0.173	0.0576055	0.898534	0.0514827	0	0	1.24453	1.18211	0.0772584	0.0228546
15	0	0	0.160304	0.00781151	1.01768	0.0239445	0.160304	0.0978807	0.00781151	0.0108257
16	0	0	0.279904	0.00678741	0.889979	0.00397277	0.279904	0.217481	0.00678741	0.00498265
17	1.11069	0.00516002	0	0	0	0	2.22138	2.15896	0.00516002	0.00376222
18	0	0	0.138167	0.00264581	1.01127	0.0085561	0.138167	0.075744	0.00264581	0.00543352
t=0	0	0	0.062423	0.0254906	1.0322	0.0173285	0.062423	0	0.0254906	0.0123858
t=24	0	0	0.211121	0.0403005	0.953698	0.0159983	0.211121	0.148698	0.0403005	0.0155502
Lysate	0	0	0.386283	0.0749116	0.754263	0.0559104	0.386283	0.32386	0.0749116	0.0259503
[truncated: 44 more columns]

## Sheet: HPLC pH 8, 50°C
Substrate and product concentrations reported by HPLC for pH 8.0 50°C
E1	BHET	MHET	TPA		E2	BHET	MHET	TPA		E10	BHET	MHET	TPA		E11	BHET	MHET	TPA		t=0	BHET	MHET	TPA		t=24	BHET	MHET	TPA
1	0	20.653	497.834		1	0	416.66	87.671		1	0	0	498.608		1	0	391.699	115.958		1	469.886	0	0		1	218.763	273.822	8.254
2	0	14.685	467.849		2	0	416.504	90.953		2	0	0	501.855		2	0	380.424	153.518		2	466.927	0	0		2	222.576	277.006	8.339
3	0	19.269	484.568		3	0	420.699	92.737		3	0	0	510.556		3	0	389.934	138.573		3	477.43	0	0		3	218.43	272.922	8.118
4	0	21.048	500.562		4	0	416.83	81.308		4	0	0	512.051		4	0	380.458	145.845		4	520.214	0	0		4	216.247	267.958	7.697
5	0	20.468	476.02		5	0	423.668	80.238		5	0	0	503.757		5	0	370.042	145.09		5	464.834	0	0		5	201.691	282.507	9.607
6	0	19.14	521.336		6	0	421.761	82.068		6	0	0	503.072		6	0	331.374	190.155		6	457.157	0	0		6	213.873	267.866	8.06
Average	0	19.2105	491.361		Average	0	419.354	85.8292		Average	0	0	504.983		Average	0	373.988	148.19		Average	476.075	0	0		Average	215.263	273.68	8.34583
Average diluted HPLC vial concentrations
	BHET	BHET ERROR	MHET	MHET error	TPA	TPA ERROR	mM ester cleaved	Total ester cleaved error	Total Error
E1	0	0	19.2105	0.874437	491.361	7.18672	1.00193	0.0525234	0.0622684
E2	0	0	419.354	1.15427	85.8292	1.99452	0.591012	0.0051324	0.0194579
E10	0	0	0	0	504.983	1.9479	1.00997	0.0037943	0.063414
E11	0	0	373.988	8.30455	148.19	9.03073	0.670368	0.0898586	0.0280037
t=0	476.075	8.42669	0	0	0	0	0	0	0.00414099
t=24	215.263	2.70216	273.68	2.08245	8.34583	0.244587	0.290372	0.00214227	0.00425504
Average udiluted reaction well concentrations
	TPA mM	TPA ERROR	MHET mM	MHET error	BHET mM	BHET ERROR	mM ester cleaved	Total ester cleaved error	Total Error
E1	0.982723	0.0143734	0.038421	0.00174887	0	0	2.00387	0.105047	0.124537
E2	0.171658	0.00398905	0.838707	0.00230853	0	0	1.18202	0.0102648	0.0389159
E10	1.00997	0.00389579	0	0	0	0	2.01993	0.00758861	0.126828
E11	0.29638	0.0180615	0.747977	0.0166091	0	0	1.34074	0.179717	0.0560074
t=0	0	0	0	0	0.952149	0.0168534	0	0	0.00828199
t=24	0.0166917	0.000489173	0.54736	0.00416489	0.430527	0.00540431	0.580744	0.00428454	0.00851007

## Sheet: HPLC pH 7.1, 37°C
Substrate and product concentrations reported by HPLC for pH 7.1 37°C
E1	BHET	MHET	TPA		E2	BHET	MHET	TPA		E10	BHET	MHET	TPA		E11	BHET	MHET	TPA		T=0	BHET	MHET	TPA		T=24	BHET	MHET	TPA
1	0	341.533	174.766		1	0	257.342	208.31		1	0	0	478.285		1	8.817	480.116	23.059		1	449.442	0	0		1	483.8	82.736	0
2	0	311.168	171.027		2	0	265.671	214.06		2	0	0	485.727		2	10.765	467.25	20.923		2	473.558	0	0		2	484.838	82.481	0
3	0	349.095	180.257		3	0	283.496	220.632		3	0	0	484.307		3	15.685	465.298	19.263		3	487.279	0	0		3	476.397	82.554	0
4	0	330.075	164.769		4	0	282.713	224.373		4	0	0	517.81		4	11.568	460.755	19.322		4	471.495	0	0		4	474.257	81.239	0
5	0	353.43	165.609		5	0	282.278	221.111		5	0	0	512.714		5	12.181	477.833	20.714		5	495.857	0	0		5	476.8	81.432	0
6	0	370.228	174.825		6	0	299.756	221.307		6	0	0	500.705		6	19.433	492.127	19.676		6	475.534	0	0		6	475.135	83.142	0
Average	0	342.588	171.875		Average	0	278.543	218.299		Average	0	0	496.591		Average	13.0748	473.897	20.4928		Average	475.527	0	0		Average	478.538	82.264	0
Average diluted HPLC vial concentrations
	BHETµM	BHET Error µM	MHET µM	MHET Error µM	TPA µM	TPA Error µM	Total mM ester cleaved	Total mM ester cleaved ERROR	Total Error
1	0	0	342.588	7.58061	171.875	2.22233	2.00387	0.00789965	0.00396648
2	0	0	278.543	5.58031	218.299	2.21761	1.18202	0.0060048	0.00330369
10	0	0	0	0	496.591	6.08083	2.01993	0.00608083	0.00333152
11	13.0748	1.43152	473.897	4.33762	20.4928	0.536701	1.34074	0.0043707	0.00276558
t=0	475.527	5.89722	0	0	0	0	0	0	0.00326411
t=24	478.538	1.70693	82.264	0.282238	0	0	0.580744	0.000282238	0.00144117
Average undiluted reaction well concentrations
	TPA mM	TPA Error mM	MHET mM	MHET Error mM	BHET mM	BHET Error mM	Total mM ester cleaved	Total mM ester cleaved Zeroed	Total mM ester cleaved ERROR	Total Error
1	0.343751	0.00444466	0.685176	0.0151612	0	0	4.00773	4.00773	0.0157993	0.00793296
2	0.436598	0.00443523	0.557085	0.0111606	0	0	2.36405	2.36405	0.0120096	0.00660738
10	0.993183	0.0121617	0	0	0	0	4.03987	4.03987	0.0121617	0.00666303
11	0.0409857	0.0010734	0.947793	0.00867524	0.0261497	0.00286304	2.68147	2.68147	0.0087414	0.00553115
t=0	0	0	0	0	0.951055	0.0117944	0	0	0	0.00652822
t=24	0	0	0.164528	0.000564477	0.957076	0.00341387	1.16149	1.16149	0.000564477	0.00288235

## Sheet: Summary HPLC
pH8, 37°C
Enzyme	TPA mM	TPA Error	MHET mM	MHET Error	BHET mM	BHET Error	Total mM ester cleaved	Total mM ester cleaved ERROR	Total Error
1	1.00925	0.0139343	0.103714	0.00180266	0	0	2.12222	0.0140504	0.0140504
2	1.10823	0.00712379	0	0	0	0	2.21647	0.00712379	0.00712379
3	0.178089	0.0213668	0.969779	0.023316	0	0	1.32596	0.0316256	0.0316256
4	1.02607	0.0122852	0.0777193	0.00971091	0	0	2.12986	0.0156598	0.0156598
5	1.04181	0.00079086	0.0684253	0.00499735	0	0	2.15205	0.00505954	0.00505954
6	0.066295	0.0133636	1.02956	0.00452434	0.032251	0.0130594	1.16215	0.0141087	0.0192251
7	0.005026	0.00134738	0.931299	0.0165288	0.205066	0.0121861	0.941351	0.0165836	0.0205795
8	0.0536253	0.000610433	1.00215	0.00793724	0.087441	0.00727712	1.1094	0.00796068	0.0107856
9	1.12865	0.0243565	0.0474017	0.00267762	0	0	2.3047	0.0245032	0.0245032
10	1.17614	0.0259489	0	0	0	0	2.35228	0.0259489	0.0259489
11	0.808171	0.0225667	0.372204	0.0111146	0	0	1.98854	0.0251553	0.0251553
12	0	0	0.254479	0.00532671	0.894989	0.00478476	0.254479	0.00532671	0.00716015
13	0	0	0.146922	0.00306751	0.967411	0.00843409	0.146922	0.00306751	0.0089746
14	0.173	0.0576055	0.898534	0.0514827	0	0	1.24453	0.0772584	0.0772584
15	0	0	0.160304	0.00781151	1.01768	0.0239445	0.160304	0.00781151	0.0251865
16	0	0	0.279904	0.00678741	0.889979	0.00397277	0.279904	0.00678741	0.00786459
17	1.11069	0.00516002	0	0	0	0	2.22138	0.00516002	0.00516002
18	0	0	0.138167	0.00264581	1.01127	0.0085561	0.138167	0.00264581	0.00895585
t=0	0	0	0.062423	0.0254906	1.0322	0.0173285	0	0.0254906	0.0308228
t=24	0	0	0.211121	0.0403005	0.953698	0.0159983	0.148698	0.0403005	0.0433598
Lysate	0	0	0.386283	0.0749116	0.754263	0.0559104	0.386283	0.0749116	0.0934758
pH8, 50°C
Enzyme	TPA	TPA Error	MHET	MHET Error	BHET	BHET Error	Total mM ester cleaved	Total mM ester cleaved ERROR	Total Error
E1	0.982723	0.0143734	0.038421	0.00174887	0	0	2.00387	0.105047	0.0144795
E2	0.171658	0.00398905	0.838707	0.00230853	0	0	1.18202	0.0102648	0.00460889
E10	1.00997	0.00389579	0	0	0	0	2.01993	0.00758861	0.00389579
E11	0.29638	0.0180615	0.747977	0.0166091	0	0	1.34074	0.179717	0.0245373
t=0	0	0	0	0	0.952149	0.0168534	0	0	0.0168534
t=24	0.0166917	0.000489173	0.54736	0.00416489	0.430527	0.00540431	0.580744	0.00428454	0.00684048
pH 7.1, 37°C
Enzyme	TPA	TPA Error	MHET	MHET Error	BHET	BHET Error	Total mM ester cleaved	Total mM ester cleaved ERROR	Total Error
E1	0.343751	0.00444466	0.685176	0.0151612	0	0	1.37268	0.0157993	0.0157993
E2	0.436598	0.00443523	0.557085	0.0111606	0	0	1.43028	0.0120096	0.0120096
E10	0.993183	0.0121617	0	0	0	0	1.98637	0.0121617	0.0121617
E11	0.0409857	0.0010734	0.947793	0.00867524	0.0261497	0.00286304	1.02976	0.0087414	0.00919832
t=0	0	0	0	0	0.951055	0.0117944	0	0	0.0117944
t=24	0	0	0.164528	0.000564477	0.957076	0.00341387	0.164528	0.000564477	0.00346022

## Sheet: Summary pH8 37°C
Table S1. Summary substrate and product analyses determined by HPLC and colorimetric assay after 24h reaction (pH 8.0, 37°C, 1 mM BHET)
Enzyme	Host species, enzyme	Accession/Product number	[TPA] mean (mM)	[TPA] error (mM)	[MHET] mean (mM)	[MHET] error (mM)	[BHET] mean (mM)	[BHET] error (mM)	mM esters cleaved (HPLC)	mM esters cleaved (HPLC) error	mM esters cleaved (colorimetric)	mM esters cleaved (colorimetric) error
1	Thermobifida fusca cutinase	WP_011291330.1	1.00925	0.0139343	0.103714	0.00180266	0	0	2.0598	0.0140504	1.58191	0.0468403
2	Ideonella sakiensis PETase	GAP38373.1	1.10823	0.00712379	0	0	0	0	2.15404	0.00712379	1.75723	0.0597576
3	Uncultured bacterium leaf-branch compost cutinase	AEV21261.1	0.178089	0.0213668	0.969779	0.023316	0	0	1.26353	0.0316256	1.07897	0.0502318
4	Thermomonospora curvata cutinase	CDN67545.1	1.02607	0.0122852	0.0777193	0.00971091	0	0	2.06743	0.0156598	1.64461	0.0776647
5	Thermobifida halotolerans DSM4493 1 esterase	AFA45122.1	1.04181	0.00079086	0.0684253	0.00499735	0	0	2.08963	0.00505954	1.56726	0.0194692
6	Thermobifida fusca cutinase	ALF04778.1	0.066295	0.0133636	1.02956	0.00452434	0.032251	0.0130594	1.09973	0.0141087	1.08719	0.098744
7	Thermobifida fusca DSM4434 2 cutinase	ADV92528.1	0.005026	0.00134738	0.931299	0.0165288	0.205066	0.0121861	0.878928	0.0165836	0.852601	0.0632834
8	Thermobifida cellulosilytica DSM4453 5 cutinase	ADV92527.1	0.0536253	0.000610433	1.00215	0.00793724	0.087441	0.00727712	1.04698	0.00796068	1.0241	0.399383
9	Thermobifida alba esterase	BAI99230.2	1.12865	0.0243565	0.0474017	0.00267762	0	0	2.24228	0.0245032	1.41751	0.109082
10	Geobacillus stearothermophilis esterase	OAO77298	1.17614	0.0259489	0	0	0	0	2.28985	0.0259489	2.013	0.115488
11	Bacillus subtilis carboxylesterase	WP_169507057	0.808171	0.0225667	0.372204	0.0111146	0	0	1.92612	0.0251553	1.52341	0.0884149
12	Aspergilis oryzae lipase		0	0	0.254479	0.00532671	0.894989	0.00478476	0.192056	0.00532671	0.599545	0.117371
13	Candida antarctica lipase A		0	0	0.146922	0.00306751	0.967411	0.00843409	0.084499	0.00306751	0.546387	0.011817
14	Candida antarctica lipase B		0.173	0.0576055	0.898534	0.0514827	0	0	1.18211	0.0772584	1.12577	0.0217034
15	Rhizopus oryzae lipase		0	0	0.160304	0.00781151	1.01768	0.0239445	0.0978807	0.00781151	0	0.0414692
16	Aspergilis oryzae phospholipase A1		0	0	0.279904	0.00678741	0.889979	0.00397277	0.217481	0.00678741	0.399415	0.0282275
17	Pseudomonas sp. lipoprotein lipase		1.11069	0.00516002	0	0	0	0	2.15896	0.00516002	1.31552	0.0622279
18	Bovine pancreas phospholipase A2		0	0	0.138167	0.00264581	1.01127	0.0085561	0.075744	0.00264581	0.588413	0.0383447
t=0	no enzyme control (0 h)		0	0	0.211121	0.0403005	0.953698	0.0159983	0.148698	0.0254906	0.454147	0
t=24	no enzyme control (24 h)		0	0	0.386283	0.0749116	0.754263	0.0559104	0.32386	0.0403005	0.433872	0.027493
Lysate	E. coli lysate		0	0	0.062423	0.0254906	1.0322	0.0173285	0	0.0749116	0.679341	0.0149313

## Sheet: Summary pH8 50°C
Table S1. Summary substrate and product analyses determined by HPLC and colorimetric assay after 24h reaction (pH 8.0, 50°C, 1mM BHET)
Enzyme	Host species, enzyme	Accession/Product number	[TPA] mean (mM)	[TPA] error (mM)	[MHET] mean (mM)	[MHET] error (mM)	[BHET] mean (mM)	[BHET] error (mM)	mM esters cleaved (HPLC)	mM esters cleaved (HPLC) error	mM esters cleaved (colorimetric)	mM esters cleaved (colorimetric) error
1	Thermobifida fusca cutinase	WP_011291330.1	0.982723	0.0143734	0.038421	0.00174887	0	0	2.00387	0.105047	1.79467	0.0465792
2	Ideonella sakiensis PETase	GAP38373.1	0.171658	0.00398905	0.838707	0.00230853	0	0	1.18202	0.0102648	1.36364	0.0845604
10	Geobacillus stearothermophilis esterase	OAO77298	1.00997	0.00389579	0	0	0	0	2.01993	0.00758861	2.25485	0.0524572
11	Bacillus subtilis carboxylesterase	WP_169507057	0.29638	0.0180615	0.747977	0.0166091	0	0	1.34074	0.179717	1.47759	0.0873064
	no enzyme control (0 h)		0	0	0	0	0.952149	0.0168534	0	0	0	0.0316953
	no enzyme control (24 h)		0.0166917	0.000489173	0.54736	0.00416489	0.430527	0.00540431	0.580744	0.00428454	1.00429	0.081337

## Sheet: Summary pH7.1 37°C
Table S1. Summary substrate and product analyses determined by HPLC and colorimetric assay after 24h reaction (pH 7.1, 37°C, 1 mM BHET)
Enzyme	Host species, enzyme	Accession/Product number	[TPA] mean (mM)	[TPA] error (mM)	[MHET] mean (mM)	[MHET] error (mM)	[BHET] mean (mM)	[BHET] error (mM)	mM esters cleaved (HPLC)	mM esters cleaved (HPLC) error	mM esters cleaved (colorimetric)	mM esters cleaved (colorimetric) error
1	Thermobifida fusca cutinase	WP_011291330.1	0.343751	0.00444466	0.685176	0.0151612	0	0	1.37268	0.0157993	1.07873	0.0226858
2	Ideonella sakiensis PETase	GAP38373.1	0.436598	0.00443523	0.557085	0.0111606	0	0	1.43028	0.0120096	0.791847	0.106359
10	Geobacillus stearothermophilis esterase	OAO77298	0.993183	0.0121617	0	0	0	0	1.98637	0.0121617	1.4411	0.0260971
11	Bacillus subtilis carboxylesterase	WP_169507057	0.0409857	0.0010734	0.947793	0.00867524	0.0261497	0.00286304	1.02976	0.0087414	0.86117	0.0550784
	no enzyme control (0 h)		0	0	0	0	0.951055	0.0117944	0	0	0	0
	no enzyme control (24 h)		0	0	0.164528	0.000564477	0.957076	0.00341387	0.164528	0.000564477	0.496718	0.00988957
